# Supplementary material for: Tau protein profiling in tauopathies: a human brain study
Source: Mol Neurodegener. 2024 Jul 19;19:54. doi: 10.1186/s13024-024-00741-9 (PMC11264707; doi:10.1186/s13024-024-00741-9)
Supplement: Supplementary file 1 — Supplementary Material 1: Figure 10 [file 13024_2024_741_MOESM1_ESM.xlsx]

## Sheet: a) Ctrl
a)
			TBS																																												SI
			6-23				25-44				45-68 0N				68-97 1N				68-87 2N				212-221				243-254				275-286 3R				299-317 4R				354-369				407-438				6-23
		Ctrl	Tau12	HT7	77G7	TauAB	Tau12	HT7	77G7	TauAB	Tau12	HT7	77G7	TauAB	Tau12	HT7	77G7	TauAB	Tau12	HT7	77G7	TauAB	Tau12	HT7	77G7	TauAB	Tau12	HT7	77G7	TauAB	Tau12	HT7	77G7	TauAB	Tau12	HT7	77G7	TauAB	Tau12	HT7	77G7	TauAB	Tau12	HT7	77G7	TauAB	HT7	77G7	TauAB
TBS	6-23	Tau12	1	0.950945	0.531282	0.317134	0.930248	0.712847	0.627507	0.184837	0.888965	0.891234	0.549276	0.244917	0.878671	0.920582	0.554882	0.17954	0.707125	0.700878	0.505679	-0.0269295	0.86723	0.697985	0.633945	0.265737	0.746107	0.951913	0.676815	0.274502	0.50048	0.517247	0.676814	0.252853	0.549636	0.488231	0.884204	0.235689	0.480489	0.467597	0.777703	0.291666	0.462718	0.450972	0.363911	0.261738	0.851667	0.276471	-0.0263704
		HT7	0.950945	1	0.710381	0.49529	0.937463	0.637936	0.770889	0.362587	0.890115	0.80623	0.690656	0.40727	0.953436	0.861267	0.732482	0.398203	0.745638	0.729026	0.707914	0.166537	0.950363	0.502893	0.770561	0.457634	0.873837	0.967002	0.803323	0.460869	0.675157	0.678198	0.803323	0.448737	0.715672	0.670374	0.895161	0.425885	0.663705	0.654832	0.889951	0.502103	0.660066	0.639193	0.591052	0.488719	0.901439	0.416009	0.188428
		77G7	0.531282	0.710381	1	0.947173	0.609996	0.153912	0.91806	0.849316	0.698585	0.418153	0.974683	0.853983	0.709314	0.370429	0.969396	0.880533	0.520416	0.388349	0.940726	0.699731	0.866732	-0.0370485	0.976721	0.934026	0.950204	0.741623	0.959917	0.935574	0.974395	0.949512	0.959917	0.92793	0.970258	0.962635	0.79042	0.928598	0.993659	0.981109	0.932725	0.960823	0.989571	0.973481	0.863972	0.953135	0.81685	0.896031	0.824001
		TauAB	0.317134	0.49529	0.947173	1	0.393438	-0.0429995	0.822233	0.950362	0.567991	0.269841	0.947314	0.958518	0.495104	0.152546	0.896948	0.953647	0.325502	0.16128	0.841436	0.793018	0.694079	-0.182736	0.914313	0.995117	0.819292	0.560557	0.858413	0.997599	0.918629	0.902745	0.858413	0.989541	0.891171	0.900648	0.667963	0.986314	0.961314	0.973324	0.798717	0.977809	0.960974	0.968169	0.73551	0.964363	0.631547	0.921959	0.911426
	25-44	Tau12	0.930248	0.937463	0.609996	0.393438	1	0.68316	0.64591	0.278758	0.825454	0.780424	0.559717	0.309799	0.891331	0.891137	0.63497	0.281086	0.746028	0.774262	0.657037	0.139415	0.891336	0.611866	0.68551	0.362763	0.771146	0.910833	0.698131	0.362567	0.555337	0.594248	0.698131	0.345741	0.59055	0.628316	0.834583	0.323699	0.546549	0.54166	0.795153	0.388502	0.538645	0.530611	0.473775	0.391069	0.859247	0.387276	0.178424
		HT7	0.712847	0.637936	0.153912	-0.0429995	0.68316	1	0.263699	-0.0341747	0.679777	0.688524	0.136243	-0.0233416	0.622635	0.83445	0.156514	-0.114515	0.693316	0.838719	0.167151	-0.0885168	0.511798	0.804432	0.19471	-0.0576481	0.350532	0.663984	0.237167	-0.047506	0.181734	0.270441	0.237167	-0.0346618	0.145435	0.0455036	0.45469	-0.104084	0.10601	0.111558	0.377608	-0.0292959	0.0739023	0.079137	0.0228644	-0.0659554	0.412557	-0.110042	-0.292415
		77G7	0.627507	0.770889	0.91806	0.822233	0.64591	0.263699	1	0.734843	0.697444	0.407628	0.88295	0.699933	0.850087	0.548102	0.968429	0.766058	0.716609	0.546118	0.919141	0.567664	0.899096	0.105373	0.909545	0.81012	0.941243	0.797634	0.94109	0.803452	0.960435	0.934031	0.94109	0.821179	0.956279	0.850909	0.85595	0.810375	0.931933	0.904544	0.911749	0.864802	0.924275	0.916455	0.768136	0.842708	0.848478	0.778437	0.691046
		TauAB	0.184837	0.362587	0.849316	0.950362	0.278758	-0.0341747	0.734843	1	0.467444	0.165542	0.839234	0.977946	0.388517	0.0853651	0.790931	0.91514	0.246372	0.11547	0.75226	0.762724	0.561086	-0.176165	0.780219	0.954229	0.698342	0.447661	0.702265	0.957372	0.844546	0.878471	0.702265	0.969663	0.797425	0.774129	0.537473	0.923086	0.874258	0.912876	0.647484	0.927497	0.876958	0.916431	0.58419	0.907505	0.470863	0.828907	0.913924
	45-68 0N	Tau12	0.888965	0.890115	0.698585	0.567991	0.825454	0.679777	0.697444	0.467444	1	0.916664	0.748084	0.54688	0.801198	0.796801	0.660227	0.463084	0.61939	0.599269	0.588759	0.243378	0.886412	0.613956	0.776543	0.524456	0.819021	0.946257	0.77245	0.541956	0.657011	0.700569	0.77245	0.522302	0.663967	0.610699	0.902709	0.501508	0.664475	0.67096	0.866819	0.521277	0.638431	0.623704	0.450221	0.479943	0.797321	0.464601	0.332437
		HT7	0.891234	0.80623	0.418153	0.269841	0.780424	0.688524	0.407628	0.165542	0.916664	1	0.500816	0.284471	0.642274	0.783274	0.359471	0.137379	0.409938	0.458018	0.295636	-0.117228	0.715279	0.758355	0.533431	0.206203	0.602727	0.846107	0.528019	0.231835	0.340328	0.40081	0.528019	0.195211	0.390868	0.360685	0.772864	0.178068	0.362947	0.375241	0.666656	0.192634	0.337579	0.319869	0.204057	0.153272	0.668157	0.178394	-0.160503
		77G7	0.549276	0.690656	0.974683	0.947314	0.559717	0.136243	0.88295	0.839234	0.748084	0.500816	1	0.873338	0.650455	0.343725	0.92	0.855951	0.434989	0.28464	0.84863	0.641981	0.84277	0.00473241	0.971601	0.919943	0.9338	0.753769	0.954029	0.929883	0.944049	0.913677	0.954029	0.911075	0.946762	0.911186	0.820409	0.919618	0.97232	0.960283	0.9275	0.930574	0.960059	0.94354	0.795971	0.904504	0.805106	0.882861	0.783409
		TauAB	0.244917	0.40727	0.853983	0.958518	0.309799	-0.0233416	0.699933	0.977946	0.54688	0.284471	0.873338	1	0.380146	0.101555	0.77306	0.919495	0.190969	0.0683512	0.711945	0.735361	0.580408	-0.143559	0.812291	0.953512	0.709046	0.487246	0.720126	0.961525	0.813422	0.840614	0.720126	0.956933	0.774988	0.780792	0.577915	0.919942	0.869589	0.918494	0.682926	0.904864	0.874619	0.907194	0.568107	0.883674	0.483332	0.807781	0.862952
	68-97 1N	Tau12	0.878671	0.953436	0.709314	0.495104	0.891331	0.622635	0.850087	0.388517	0.801198	0.642274	0.650455	0.380146	1	0.871752	0.788829	0.439767	0.876174	0.823919	0.77539	0.254109	0.936071	0.451282	0.749415	0.477245	0.858573	0.915406	0.799845	0.468803	0.726086	0.72827	0.799845	0.482526	0.741155	0.664382	0.865414	0.453447	0.684798	0.667521	0.859215	0.539557	0.682679	0.668888	0.59814	0.529574	0.867078	0.433943	0.273233
		HT7	0.920582	0.861267	0.370429	0.152546	0.891137	0.83445	0.548102	0.0853651	0.796801	0.783274	0.343725	0.101555	0.871752	1	0.448966	0.0831016	0.809142	0.839048	0.435427	-0.0603032	0.764471	0.810913	0.467013	0.125941	0.591332	0.849808	0.507041	0.124045	0.378841	0.444876	0.507041	0.133995	0.392878	0.329897	0.766204	0.0918541	0.333063	0.333293	0.626541	0.153079	0.317495	0.319585	0.187694	0.131957	0.687565	0.105386	-0.125295
		77G7	0.554882	0.732482	0.969396	0.896948	0.63497	0.156514	0.968429	0.790931	0.660227	0.359471	0.92	0.77306	0.788829	0.448966	1	0.862214	0.639049	0.476518	0.969923	0.689491	0.881682	-0.0204676	0.959829	0.893483	0.9386	0.739383	0.959732	0.884375	0.96888	0.934983	0.959732	0.889582	0.960455	0.945031	0.813082	0.893077	0.974396	0.957389	0.923245	0.927488	0.97634	0.962721	0.836827	0.926023	0.822832	0.856919	0.785754
		TauAB	0.17954	0.398203	0.880533	0.953647	0.281086	-0.114515	0.766058	0.91514	0.463084	0.137379	0.855951	0.919495	0.439767	0.0831016	0.862214	1	0.299879	0.138474	0.818934	0.853242	0.594012	-0.292182	0.842807	0.971618	0.713221	0.421482	0.770273	0.964379	0.851518	0.836756	0.770273	0.970215	0.801608	0.849766	0.544105	0.968501	0.908893	0.937001	0.711075	0.945188	0.924281	0.924972	0.698039	0.950777	0.470562	0.832886	0.894781
	68-87 2N	Tau12	0.707125	0.745638	0.520416	0.325502	0.746028	0.693316	0.716609	0.246372	0.61939	0.409938	0.434989	0.190969	0.876174	0.809142	0.639049	0.299879	1	0.946983	0.62716	0.359019	0.748224	0.433807	0.552275	0.338394	0.643446	0.736464	0.628149	0.320281	0.59611	0.584488	0.628149	0.346279	0.542784	0.458902	0.672647	0.324489	0.510221	0.478186	0.651012	0.390586	0.493482	0.491479	0.417635	0.375293	0.673707	0.335955	0.243911
		HT7	0.700878	0.729026	0.388349	0.16128	0.774262	0.838719	0.546118	0.11547	0.599269	0.458018	0.28464	0.0683512	0.823919	0.839048	0.476518	0.138474	0.946983	1	0.51379	0.222397	0.672047	0.53383	0.407457	0.175315	0.535875	0.696319	0.471872	0.161461	0.440412	0.466203	0.471872	0.187409	0.390029	0.335169	0.54647	0.14269	0.353913	0.336015	0.545066	0.232405	0.339857	0.337019	0.330275	0.227655	0.57998	0.151306	0.0640862
		77G7	0.505679	0.707914	0.940726	0.841436	0.657037	0.167151	0.919141	0.75226	0.588759	0.295636	0.84863	0.711945	0.77539	0.435427	0.969923	0.818934	0.62716	0.51379	1	0.66443	0.857211	-0.0322743	0.907921	0.845445	0.906309	0.68935	0.903482	0.833376	0.932493	0.919866	0.903482	0.846031	0.931212	0.953537	0.730644	0.843403	0.934185	0.913704	0.880857	0.900754	0.940005	0.920113	0.876066	0.919443	0.798527	0.829745	0.780295
		TauAB	-0.0269295	0.166537	0.699731	0.793018	0.139415	-0.0885168	0.567664	0.762724	0.243378	-0.117228	0.641981	0.735361	0.254109	-0.0603032	0.689491	0.853242	0.359019	0.222397	0.66443	1	0.37916	-0.394945	0.647871	0.842441	0.483259	0.207144	0.589883	0.827127	0.696447	0.651453	0.589883	0.828351	0.580764	0.677384	0.296068	0.84377	0.725151	0.739025	0.490443	0.797377	0.729143	0.737309	0.563678	0.808692	0.272574	0.762643	0.884562
	212-221	Tau12	0.86723	0.950363	0.866732	0.694079	0.891336	0.511798	0.899096	0.561086	0.886412	0.715279	0.84277	0.580408	0.936071	0.764471	0.881682	0.594012	0.748224	0.672047	0.857211	0.37916	1	0.392256	0.907711	0.662383	0.967676	0.959343	0.932101	0.664754	0.846887	0.847419	0.932101	0.656976	0.872579	0.833491	0.946845	0.650955	0.8365	0.812199	0.97599	0.709349	0.822801	0.798899	0.725994	0.694614	0.957238	0.663795	0.512877
		HT7	0.697985	0.502893	-0.0370485	-0.182736	0.611866	0.804432	0.105373	-0.176165	0.613956	0.758355	0.00473241	-0.143559	0.451282	0.810913	-0.0204676	-0.292182	0.433807	0.53383	-0.0322743	-0.394945	0.392256	1	0.0777345	-0.226112	0.195622	0.573342	0.0982508	-0.21011	-0.0300148	0.102744	0.0982507	-0.207248	-0.00728901	-0.0795689	0.486089	-0.249529	-0.0743136	-0.0708843	0.244065	-0.228896	-0.116404	-0.10294	-0.25553	-0.271244	0.354274	-0.17302	-0.487146
		77G7	0.633945	0.770561	0.976721	0.914313	0.68551	0.19471	0.909545	0.780219	0.776543	0.533431	0.971601	0.812291	0.749415	0.467013	0.959829	0.842807	0.552275	0.407457	0.907921	0.647871	0.907711	0.0777345	1	0.894172	0.954533	0.802147	0.98092	0.895712	0.933447	0.906107	0.98092	0.876853	0.936964	0.955115	0.875182	0.893046	0.966221	0.955044	0.966046	0.900923	0.960004	0.940595	0.801098	0.89166	0.859225	0.872468	0.772407
		TauAB	0.265737	0.457634	0.934026	0.995117	0.362763	-0.0576481	0.81012	0.954229	0.524456	0.206203	0.919943	0.953512	0.477245	0.125941	0.893483	0.971618	0.338394	0.175315	0.845445	0.842441	0.662383	-0.226112	0.894172	1	0.787908	0.514885	0.833971	0.998649	0.909677	0.893345	0.833971	0.995267	0.868732	0.891636	0.623384	0.990618	0.95184	0.967735	0.768265	0.979334	0.954999	0.964253	0.728278	0.971539	0.585146	0.913912	0.931601
	243-254	Tau12	0.746107	0.873837	0.950204	0.819292	0.771146	0.350532	0.941243	0.698342	0.819021	0.602727	0.9338	0.709046	0.858573	0.591332	0.9386	0.713221	0.643446	0.535875	0.906309	0.483259	0.967676	0.195622	0.954533	0.787908	1	0.896691	0.974187	0.792861	0.936116	0.917082	0.974187	0.785127	0.961082	0.900761	0.903526	0.780034	0.930487	0.903345	0.984356	0.840959	0.918827	0.895866	0.826924	0.822552	0.939891	0.778876	0.636661
		HT7	0.951913	0.967002	0.741623	0.560557	0.910833	0.663984	0.797634	0.447661	0.946257	0.846107	0.753769	0.487246	0.915406	0.849808	0.739383	0.421482	0.736464	0.696319	0.68935	0.207144	0.959343	0.573342	0.802147	0.514885	0.896691	1	0.834812	0.525668	0.726187	0.743967	0.834811	0.512195	0.754681	0.66924	0.947239	0.488649	0.703236	0.687369	0.907914	0.549949	0.680639	0.669691	0.551689	0.513705	0.92456	0.506693	0.301413
		77G7	0.676815	0.803323	0.959917	0.858413	0.698131	0.237167	0.94109	0.702265	0.77245	0.528019	0.954029	0.720126	0.799845	0.507041	0.959732	0.770273	0.628149	0.471872	0.903482	0.589883	0.932101	0.0982508	0.98092	0.833971	0.974187	0.834812	1	0.835311	0.944599	0.894299	1	0.819524	0.955562	0.924748	0.89171	0.844283	0.950614	0.914583	0.978316	0.869992	0.936856	0.906231	0.834796	0.853594	0.911014	0.849337	0.700321
		TauAB	0.274502	0.460869	0.935574	0.997599	0.362567	-0.047506	0.803452	0.957372	0.541956	0.231835	0.929883	0.961525	0.468803	0.124045	0.884375	0.964379	0.320281	0.161461	0.833376	0.827127	0.664754	-0.21011	0.895712	0.998649	0.792861	0.525668	0.835311	1	0.909088	0.895273	0.835311	0.99444	0.871001	0.887386	0.629578	0.989257	0.951733	0.966948	0.773062	0.978142	0.952285	0.960695	0.726235	0.966789	0.591109	0.915074	0.926569
	275-286 3R	Tau12	0.50048	0.675157	0.974395	0.918629	0.555337	0.181734	0.960435	0.844546	0.657011	0.340328	0.944049	0.813422	0.726086	0.378841	0.96888	0.851518	0.59611	0.440412	0.932493	0.696447	0.846887	-0.0300148	0.933447	0.909677	0.936116	0.726187	0.944599	0.909088	1	0.972497	0.944599	0.918336	0.982832	0.904143	0.774644	0.911279	0.984225	0.957394	0.899676	0.95777	0.972047	0.961138	0.841617	0.937043	0.801386	0.882925	0.824113
		HT7	0.517247	0.678198	0.949512	0.902745	0.594248	0.270441	0.934031	0.878471	0.700569	0.40081	0.913677	0.840614	0.72827	0.444876	0.934983	0.836756	0.584488	0.466203	0.919866	0.651453	0.847419	0.102744	0.906107	0.893345	0.917082	0.743967	0.894299	0.895273	0.972497	1	0.894299	0.914581	0.952569	0.878063	0.780333	0.88281	0.95737	0.948077	0.877849	0.933746	0.943154	0.94581	0.762208	0.912218	0.772602	0.847294	0.857099
		77G7	0.676814	0.803323	0.959917	0.858413	0.698131	0.237167	0.94109	0.702265	0.77245	0.528019	0.954029	0.720126	0.799845	0.507041	0.959732	0.770273	0.628149	0.471872	0.903482	0.589883	0.932101	0.0982507	0.98092	0.833971	0.974187	0.834811	1	0.835311	0.944599	0.894299	1	0.819524	0.955562	0.924748	0.89171	0.844283	0.950614	0.914583	0.978316	0.869992	0.936856	0.906231	0.834796	0.853594	0.911014	0.849337	0.700321
		TauAB	0.252853	0.448737	0.92793	0.989541	0.345741	-0.0346618	0.821179	0.969663	0.522302	0.195211	0.911075	0.956933	0.482526	0.133995	0.889582	0.970215	0.346279	0.187409	0.846031	0.828351	0.656976	-0.207248	0.876853	0.995267	0.785127	0.512195	0.819524	0.99444	0.918336	0.914581	0.819524	1	0.874743	0.872063	0.614032	0.985449	0.95082	0.966995	0.757096	0.983233	0.952221	0.964003	0.718978	0.971701	0.570288	0.899368	0.93622
	299-317 4R	Tau12	0.549636	0.715672	0.970258	0.891171	0.59055	0.145435	0.956279	0.797425	0.663967	0.390868	0.946762	0.774988	0.741155	0.392878	0.960455	0.801608	0.542784	0.390029	0.931212	0.580764	0.872579	-0.00728901	0.936964	0.868732	0.961082	0.754681	0.955562	0.871001	0.982832	0.952569	0.955562	0.874743	1	0.919091	0.805298	0.874124	0.972555	0.937268	0.920246	0.931617	0.96172	0.942033	0.870378	0.913901	0.857716	0.869945	0.758012
		HT7	0.488231	0.670374	0.962635	0.900648	0.628316	0.0455036	0.850909	0.774129	0.610699	0.360685	0.911186	0.780792	0.664382	0.329897	0.945031	0.849766	0.458902	0.335169	0.953537	0.677384	0.833491	-0.0795689	0.955115	0.891636	0.900761	0.66924	0.924748	0.887386	0.904143	0.878063	0.924748	0.872063	0.919091	1	0.744162	0.895101	0.946077	0.929355	0.896907	0.915292	0.949847	0.923171	0.876846	0.9344	0.803203	0.902624	0.809644
		77G7	0.884204	0.895161	0.79042	0.667963	0.834583	0.45469	0.85595	0.537473	0.902709	0.772864	0.820409	0.577915	0.865414	0.766204	0.813082	0.544105	0.672647	0.54647	0.730644	0.296068	0.946845	0.486089	0.875182	0.623384	0.903526	0.947239	0.89171	0.629578	0.774644	0.780333	0.89171	0.614032	0.805298	0.744162	1	0.615249	0.774318	0.758036	0.925232	0.633688	0.753449	0.746961	0.542484	0.598153	0.921354	0.63873	0.458075
		TauAB	0.235689	0.425885	0.928598	0.986314	0.323699	-0.104084	0.810375	0.923086	0.501508	0.178068	0.919618	0.919942	0.453447	0.0918541	0.893077	0.968501	0.324489	0.14269	0.843403	0.84377	0.650955	-0.249529	0.893046	0.990618	0.780034	0.488649	0.844283	0.989257	0.911279	0.88281	0.844283	0.985449	0.874124	0.895101	0.615249	1	0.951603	0.950913	0.768477	0.980249	0.949057	0.94376	0.755433	0.973154	0.584998	0.938182	0.938989
	354-369	Tau12	0.480489	0.663705	0.993659	0.961314	0.546549	0.10601	0.931933	0.874258	0.664475	0.362947	0.97232	0.869589	0.684798	0.333063	0.974396	0.908893	0.510221	0.353913	0.934185	0.725151	0.8365	-0.0743136	0.966221	0.95184	0.930487	0.703236	0.950614	0.951733	0.984225	0.95737	0.950614	0.95082	0.972555	0.946077	0.774318	0.951603	1	0.987468	0.909927	0.977289	0.995772	0.98288	0.84462	0.965653	0.779567	0.904849	0.850433
		HT7	0.467597	0.654832	0.981109	0.973324	0.54166	0.111558	0.904544	0.912876	0.67096	0.375241	0.960283	0.918494	0.667521	0.333293	0.957389	0.937001	0.478186	0.336015	0.913704	0.739025	0.812199	-0.0708843	0.955044	0.967735	0.903345	0.687369	0.914583	0.966948	0.957394	0.948077	0.914583	0.966995	0.937268	0.929355	0.758036	0.950913	0.987468	1	0.884501	0.970319	0.992085	0.993904	0.784475	0.960672	0.726653	0.868368	0.849584
		77G7	0.777703	0.889951	0.932725	0.798717	0.795153	0.377608	0.911749	0.647484	0.866819	0.666656	0.9275	0.682926	0.859215	0.626541	0.923245	0.711075	0.651012	0.545066	0.880857	0.490443	0.97599	0.244065	0.966046	0.768265	0.984356	0.907914	0.978316	0.773062	0.899676	0.877849	0.978316	0.757096	0.920246	0.896907	0.925232	0.768477	0.909927	0.884501	1	0.805348	0.897125	0.863161	0.800751	0.790811	0.931097	0.759328	0.623924
		TauAB	0.291666	0.502103	0.960823	0.977809	0.388502	-0.0292959	0.864802	0.927497	0.521277	0.192634	0.930574	0.904864	0.539557	0.153079	0.927488	0.945188	0.390586	0.232405	0.900754	0.797377	0.709349	-0.228896	0.900923	0.979334	0.840959	0.549949	0.869992	0.978142	0.95777	0.933746	0.869992	0.983233	0.931617	0.915292	0.633688	0.980249	0.977289	0.970319	0.805348	1	0.976213	0.970347	0.827214	0.993137	0.650146	0.922511	0.913488
	407-438	Tau12	0.462718	0.660066	0.989571	0.960974	0.538645	0.0739023	0.924275	0.876958	0.638431	0.337579	0.960059	0.874619	0.682679	0.317495	0.97634	0.924281	0.493482	0.339857	0.940005	0.729143	0.822801	-0.116404	0.960004	0.954999	0.918827	0.680639	0.936856	0.952285	0.972047	0.943154	0.936856	0.952221	0.96172	0.949847	0.753449	0.949057	0.995772	0.992085	0.897125	0.976213	1	0.989796	0.845292	0.971245	0.757043	0.884379	0.835422
		HT7	0.450972	0.639193	0.973481	0.968169	0.530611	0.079137	0.916455	0.916431	0.623704	0.319869	0.94354	0.907194	0.668888	0.319585	0.962721	0.924972	0.491479	0.337019	0.920113	0.737309	0.798899	-0.10294	0.940595	0.964253	0.895866	0.669691	0.906231	0.960695	0.961138	0.94581	0.906231	0.964003	0.942033	0.923171	0.746961	0.94376	0.98288	0.993904	0.863161	0.970347	0.989796	1	0.777358	0.960619	0.728095	0.872817	0.848609
		77G7	0.363911	0.591052	0.863972	0.73551	0.473775	0.0228644	0.768136	0.58419	0.450221	0.204057	0.795971	0.568107	0.59814	0.187694	0.836827	0.698039	0.417635	0.330275	0.876066	0.563678	0.725994	-0.25553	0.801098	0.728278	0.826924	0.551689	0.834796	0.726235	0.841617	0.762208	0.834796	0.718978	0.870378	0.876846	0.542484	0.755433	0.84462	0.784475	0.800751	0.827214	0.845292	0.777358	1	0.849558	0.730455	0.762178	0.614373
		TauAB	0.261738	0.488719	0.953135	0.964363	0.391069	-0.0659554	0.842708	0.907505	0.479943	0.153272	0.904504	0.883674	0.529574	0.131957	0.926023	0.950777	0.375293	0.227655	0.919443	0.808692	0.694614	-0.271244	0.89166	0.971539	0.822552	0.513705	0.853594	0.966789	0.937043	0.912218	0.853594	0.971701	0.913901	0.9344	0.598153	0.973154	0.965653	0.960672	0.790811	0.993137	0.971245	0.960619	0.849558	1	0.63109	0.915127	0.912514
SI	6-23	HT7	0.851667	0.901439	0.81685	0.631547	0.859247	0.412557	0.848478	0.470863	0.797321	0.668157	0.805106	0.483332	0.867078	0.687565	0.822832	0.470562	0.673707	0.57998	0.798527	0.272574	0.957238	0.354274	0.859225	0.585146	0.939891	0.92456	0.911014	0.591109	0.801386	0.772602	0.911014	0.570288	0.857716	0.803203	0.921354	0.584998	0.779567	0.726653	0.931097	0.650146	0.757043	0.728095	0.730455	0.63109	1	0.681702	0.425527
		77G7	0.276471	0.416009	0.896031	0.921959	0.387276	-0.110042	0.778437	0.828907	0.464601	0.178394	0.882861	0.807781	0.433943	0.105386	0.856919	0.832886	0.335955	0.151306	0.829745	0.762643	0.663795	-0.17302	0.872468	0.913912	0.778876	0.506693	0.849337	0.915074	0.882925	0.847294	0.849337	0.899368	0.869945	0.902624	0.63873	0.938182	0.904849	0.868368	0.759328	0.922511	0.884379	0.872817	0.762178	0.915127	0.681702	1	0.923363
		TauAB	-0.0263704	0.188428	0.824001	0.911426	0.178424	-0.292415	0.691046	0.913924	0.332437	-0.160503	0.783409	0.862952	0.273233	-0.125295	0.785754	0.894781	0.243911	0.0640862	0.780295	0.884562	0.512877	-0.487146	0.772407	0.931601	0.636661	0.301413	0.700321	0.926569	0.824113	0.857099	0.700321	0.93622	0.758012	0.809644	0.458075	0.938989	0.850433	0.849584	0.623924	0.913488	0.835422	0.848609	0.614373	0.912514	0.425527	0.923363	1
	25-44	HT7	0.73411	0.686598	0.372162	0.255505	0.797081	0.689591	0.466922	0.219877	0.735098	0.684393	0.33514	0.245937	0.709976	0.874313	0.445856	0.256396	0.687958	0.707286	0.446097	0.162838	0.661665	0.750517	0.487187	0.253161	0.484499	0.692956	0.449287	0.244933	0.340201	0.451717	0.449287	0.254261	0.314079	0.387895	0.692443	0.222481	0.347004	0.382912	0.557961	0.212856	0.337929	0.353757	0.0878514	0.213549	0.519177	0.207493	0.150642
		77G7	0.424365	0.544322	0.903212	0.881388	0.530111	0.141533	0.8585	0.793034	0.584772	0.270597	0.871666	0.755433	0.602667	0.324358	0.898857	0.796688	0.587023	0.417113	0.868427	0.782183	0.766364	0.00840543	0.891273	0.880804	0.831505	0.637982	0.890333	0.877765	0.921679	0.897715	0.890333	0.873813	0.88137	0.879253	0.730227	0.897373	0.910556	0.871783	0.819407	0.896391	0.882636	0.876762	0.734464	0.880076	0.751314	0.953905	0.90181
		TauAB	0.127168	0.397156	0.875286	0.90333	0.347198	-0.0930193	0.778938	0.8972	0.457957	-0.0709101	0.792696	0.854004	0.49723	0.0870664	0.873532	0.940898	0.445336	0.30939	0.878651	0.917343	0.640889	-0.473804	0.823635	0.937337	0.720344	0.429168	0.75414	0.922832	0.865527	0.890158	0.75414	0.941067	0.786358	0.848357	0.512682	0.919222	0.891263	0.913822	0.719917	0.924335	0.898836	0.910956	0.684876	0.937977	0.473632	0.822392	0.92643
	45-68 0N	HT7	0.690043	0.521521	0.217619	0.0878889	0.572407	0.676955	0.242133	0.0178236	0.721658	0.809345	0.31356	0.0726157	0.403781	0.631052	0.145044	-0.107023	0.349154	0.390596	0.10058	-0.195981	0.510745	0.830472	0.309847	0.0226481	0.403979	0.664995	0.351893	0.0556787	0.215806	0.289021	0.351893	0.0285444	0.249461	0.149222	0.5959	0.035892	0.176175	0.129732	0.449082	0.0423146	0.105462	0.0825317	0.0522427	-0.021105	0.547202	0.176604	-0.186927
		77G7	0.404841	0.533805	0.914118	0.914374	0.448699	0.0233431	0.779245	0.7827	0.659272	0.41325	0.942722	0.817996	0.497684	0.217746	0.851659	0.849262	0.330397	0.171178	0.797834	0.692994	0.742455	-0.0335994	0.924335	0.894471	0.830436	0.617389	0.89568	0.904249	0.872834	0.845903	0.89568	0.880326	0.867745	0.897043	0.727839	0.927921	0.917057	0.886996	0.855171	0.897494	0.893386	0.854598	0.771979	0.883323	0.709819	0.928327	0.867361
		TauAB	0.0240721	0.228879	0.854739	0.954656	0.135199	-0.338609	0.726404	0.917932	0.429241	-0.0620445	0.86224	0.903527	0.282091	-0.142979	0.811085	0.939599	0.21918	-0.00657191	0.745348	0.890192	0.537742	-0.537522	0.828465	0.965852	0.674469	0.348519	0.764608	0.964593	0.849406	0.844158	0.764608	0.962665	0.785485	0.806967	0.529779	0.980214	0.889131	0.888641	0.684366	0.934186	0.874297	0.878742	0.62196	0.918847	0.445509	0.924857	0.964141
	68-97 1N	HT7	0.788593	0.762987	0.467389	0.205711	0.775972	0.691374	0.615294	0.0612117	0.662763	0.575174	0.429596	0.0285947	0.799155	0.782114	0.518849	0.0745201	0.826633	0.808218	0.530496	0.0641489	0.768088	0.572243	0.511419	0.175979	0.665969	0.791734	0.629164	0.178359	0.524474	0.507538	0.629164	0.179923	0.546223	0.433644	0.697973	0.200008	0.430438	0.339195	0.675375	0.282939	0.382873	0.334238	0.492425	0.25771	0.805965	0.342566	0.0503049
		77G7	0.424969	0.583586	0.91357	0.878721	0.522359	0.116354	0.936761	0.801228	0.548605	0.202672	0.85742	0.745518	0.691765	0.363981	0.957981	0.842028	0.660239	0.469078	0.92563	0.778287	0.784585	-0.0555334	0.891341	0.887797	0.850076	0.633771	0.899722	0.875412	0.953442	0.920282	0.899722	0.88969	0.912985	0.881056	0.733447	0.898545	0.934751	0.905095	0.825803	0.917163	0.923588	0.921915	0.759842	0.907537	0.739172	0.898661	0.865054
		TauAB	0.081444	0.312603	0.868434	0.8974	0.282404	-0.219821	0.803675	0.871015	0.363937	-0.166911	0.800163	0.798835	0.438125	0.00925647	0.873285	0.886137	0.41813	0.224127	0.874991	0.878521	0.624902	-0.473979	0.817779	0.920458	0.723864	0.397417	0.783178	0.908563	0.893169	0.9031	0.783178	0.926328	0.833262	0.855351	0.536327	0.933579	0.894922	0.874325	0.708423	0.93364	0.881301	0.883627	0.708724	0.936551	0.537948	0.927949	0.97293
	68-87 2N	HT7	0.365817	0.345135	0.260494	0.107222	0.428375	0.482103	0.412565	0.0289799	0.238646	0.0560656	0.180332	-0.0681182	0.484101	0.439425	0.346433	0.0206989	0.793759	0.73906	0.354925	0.327813	0.40439	0.233871	0.260385	0.125897	0.338918	0.395987	0.374816	0.111351	0.371361	0.311947	0.374816	0.122038	0.303765	0.223015	0.330643	0.143089	0.249994	0.16577	0.324999	0.190476	0.206011	0.199378	0.280877	0.16974	0.456131	0.302814	0.205549
		77G7	0.227039	0.3766	0.770699	0.793323	0.422593	0.139854	0.711163	0.775786	0.394212	0.0445486	0.684313	0.712183	0.485811	0.22879	0.787687	0.77962	0.593273	0.471076	0.791038	0.909446	0.58112	-0.111139	0.730952	0.829726	0.635024	0.437207	0.695639	0.813742	0.7901	0.784261	0.695639	0.823318	0.693899	0.757295	0.501678	0.816836	0.78066	0.780666	0.6181	0.810213	0.771852	0.797038	0.584634	0.814306	0.508451	0.823458	0.894848
		TauAB	0.0270268	0.242668	0.738505	0.753639	0.304392	-0.0283877	0.672411	0.7579	0.270192	-0.255714	0.625348	0.66437	0.400183	0.0608545	0.754116	0.764101	0.515159	0.396341	0.798263	0.899917	0.526736	-0.378801	0.675601	0.797534	0.584983	0.313018	0.638594	0.779834	0.770636	0.798259	0.638594	0.803473	0.672752	0.738669	0.386806	0.798515	0.753423	0.739796	0.570792	0.803455	0.739207	0.751456	0.601475	0.817832	0.421077	0.809692	0.912924
	212-221	HT7	0.26205	0.039492	-0.316964	-0.414015	0.185948	0.523763	-0.209266	-0.376408	0.20814	0.385951	-0.266289	-0.394656	0.00942761	0.384937	-0.337977	-0.536171	0.0945774	0.203904	-0.3039	-0.520631	0.00736707	0.800075	-0.254951	-0.454469	-0.134173	0.165158	-0.2041	-0.431266	-0.265239	-0.140506	-0.2041	-0.422055	-0.23588	-0.334376	0.0906325	-0.426047	-0.338381	-0.389105	-0.108458	-0.415055	-0.407059	-0.418705	-0.368749	-0.457824	0.0584199	-0.247895	-0.499878
		77G7	0.581414	0.663518	0.911702	0.869905	0.630752	0.225613	0.864267	0.740912	0.741508	0.483034	0.918703	0.750744	0.669227	0.446641	0.897571	0.771685	0.589891	0.423196	0.836097	0.686774	0.84846	0.156272	0.945374	0.852684	0.882711	0.756918	0.940871	0.855765	0.901252	0.879053	0.940871	0.837089	0.879995	0.884457	0.852457	0.870629	0.909847	0.875984	0.901731	0.853258	0.879459	0.863246	0.704984	0.829534	0.826084	0.916125	0.835796
		TauAB	0.0724378	0.294669	0.888156	0.941002	0.241432	-0.249375	0.780823	0.912591	0.414093	-0.100623	0.852371	0.863312	0.377357	-0.058526	0.857304	0.909378	0.33146	0.133637	0.836408	0.88654	0.609912	-0.49724	0.839391	0.955563	0.731662	0.403977	0.794429	0.950804	0.898641	0.904778	0.79443	0.958051	0.840282	0.855746	0.543813	0.966769	0.912701	0.897122	0.719833	0.955525	0.895249	0.898372	0.702626	0.94842	0.530705	0.952856	0.986354
	243-254	HT7	0.859946	0.770553	0.532625	0.373658	0.867586	0.604035	0.55265	0.22634	0.8179	0.794912	0.553108	0.272036	0.702262	0.785207	0.530932	0.208246	0.638909	0.606288	0.501048	0.143371	0.797536	0.695305	0.650712	0.329335	0.678824	0.845453	0.672863	0.339656	0.492856	0.522499	0.672863	0.303821	0.51863	0.547256	0.8441	0.331093	0.482715	0.444591	0.734138	0.329219	0.438605	0.421588	0.337878	0.304307	0.821902	0.482929	0.234104
		77G7	0.550261	0.661934	0.950192	0.931921	0.621588	0.14943	0.868909	0.819172	0.721596	0.461211	0.950627	0.837534	0.653773	0.396982	0.926788	0.845655	0.521324	0.358781	0.870107	0.72024	0.84173	0.0728422	0.973985	0.916694	0.894998	0.735361	0.943977	0.918476	0.916829	0.899603	0.943977	0.89827	0.900556	0.932388	0.838487	0.919251	0.946675	0.934309	0.905482	0.903393	0.930499	0.924784	0.726166	0.888286	0.806372	0.933506	0.860101
		TauAB	0.123817	0.364298	0.92332	0.963304	0.294518	-0.194969	0.790046	0.928139	0.485121	-0.0257698	0.886439	0.895723	0.419535	-0.0269743	0.878593	0.935077	0.344109	0.169995	0.858069	0.901688	0.651976	-0.510563	0.87343	0.977419	0.770784	0.454727	0.821184	0.973801	0.914716	0.91695	0.821184	0.975848	0.856089	0.883794	0.561095	0.977485	0.938074	0.932902	0.765021	0.973452	0.926847	0.928149	0.741267	0.969285	0.553232	0.937963	0.970293
	275-286 3R	HT7	0.299459	0.478759	0.917431	0.911404	0.421047	0.108252	0.845424	0.886439	0.515051	0.17616	0.870999	0.82745	0.543179	0.207574	0.881926	0.843511	0.487334	0.355257	0.880671	0.786801	0.704357	-0.110409	0.843112	0.915186	0.817487	0.564864	0.833952	0.915805	0.948814	0.945687	0.833952	0.928987	0.906835	0.860999	0.612793	0.919736	0.929578	0.902192	0.769062	0.955242	0.908815	0.907104	0.790704	0.939384	0.665582	0.924909	0.92832
		77G7	0.378198	0.524219	0.917071	0.906236	0.517235	0.165079	0.820004	0.867847	0.59123	0.28786	0.877329	0.827832	0.559176	0.285037	0.872184	0.820987	0.490637	0.375008	0.876544	0.762331	0.746608	0.0145615	0.872873	0.904094	0.828981	0.620139	0.846617	0.906957	0.920721	0.938797	0.846617	0.909432	0.885288	0.887902	0.676038	0.906846	0.917013	0.894532	0.800855	0.925191	0.89178	0.890744	0.750019	0.912869	0.709513	0.941996	0.945521
		TauAB	0.0804102	0.297782	0.871785	0.918535	0.246853	-0.117129	0.752355	0.918652	0.444791	-0.0708916	0.836364	0.863563	0.369391	-0.0447965	0.815251	0.864911	0.353705	0.19648	0.800339	0.879728	0.596095	-0.446726	0.7997	0.932573	0.722963	0.426669	0.760367	0.932522	0.893163	0.910557	0.760367	0.941495	0.821938	0.805288	0.505243	0.931042	0.889293	0.87637	0.694915	0.938045	0.865984	0.876992	0.684265	0.92106	0.515466	0.916709	0.965756
	299-317 4R	HT7	0.401705	0.576337	0.948185	0.909631	0.485561	0.0242016	0.911322	0.807646	0.575311	0.268027	0.915351	0.777332	0.632816	0.284886	0.950775	0.868581	0.491138	0.312619	0.932321	0.702125	0.792367	-0.0828675	0.923065	0.903149	0.881569	0.625531	0.923102	0.900013	0.958018	0.931567	0.923102	0.906462	0.954159	0.935288	0.732133	0.933197	0.963941	0.923501	0.866109	0.950263	0.949984	0.919704	0.852971	0.946091	0.758182	0.93413	0.880348
		77G7	0.401945	0.54347	0.913113	0.876093	0.492949	0.159426	0.815521	0.770995	0.637141	0.344703	0.898335	0.758466	0.561902	0.282356	0.867843	0.810184	0.488087	0.355779	0.85227	0.741781	0.764894	0.0110371	0.892685	0.869084	0.839674	0.632717	0.888032	0.874583	0.911499	0.8968	0.888032	0.867932	0.883367	0.885402	0.696042	0.902253	0.914584	0.868426	0.845904	0.902652	0.881931	0.844469	0.80889	0.889618	0.727612	0.930403	0.9162
		TauAB	0.119887	0.340299	0.897874	0.909991	0.311259	-0.26006	0.790713	0.850459	0.392372	-0.0976628	0.845867	0.793706	0.416772	-0.0318778	0.872099	0.857811	0.356079	0.164848	0.875678	0.839558	0.655881	-0.492584	0.851463	0.919717	0.766508	0.434299	0.825814	0.913927	0.902924	0.894885	0.825814	0.916096	0.867043	0.897362	0.563149	0.939767	0.910896	0.874111	0.75306	0.942494	0.891051	0.880278	0.776468	0.944541	0.613675	0.975567	0.959891
	354-369	HT7	0.295572	0.447904	0.899692	0.906854	0.405842	0.0485278	0.796839	0.813422	0.521241	0.191339	0.875613	0.789715	0.490566	0.171657	0.867539	0.849854	0.478398	0.314135	0.835731	0.860722	0.683981	-0.141819	0.870197	0.913281	0.781004	0.536455	0.857981	0.912153	0.904758	0.863561	0.857981	0.90299	0.852304	0.871436	0.624941	0.936819	0.909647	0.873549	0.776797	0.922753	0.884991	0.867489	0.770961	0.911344	0.655142	0.96018	0.92631
		77G7	0.644606	0.733769	0.892479	0.780634	0.710495	0.381884	0.841034	0.639081	0.776739	0.537367	0.877978	0.641594	0.729418	0.520642	0.864225	0.669361	0.663548	0.558817	0.841982	0.613784	0.88872	0.228087	0.909024	0.761307	0.904177	0.810077	0.931053	0.767491	0.885502	0.865056	0.931053	0.750271	0.871433	0.862835	0.82683	0.781539	0.871474	0.818377	0.92035	0.800204	0.834125	0.797395	0.778043	0.781064	0.873312	0.850068	0.761579
		TauAB	0.0753343	0.313847	0.891203	0.902275	0.245748	-0.23287	0.797219	0.858325	0.369975	-0.146676	0.840929	0.791412	0.405473	-0.0689393	0.860098	0.856871	0.36201	0.17569	0.860595	0.844097	0.628498	-0.536507	0.8211	0.914225	0.758289	0.412441	0.808947	0.910064	0.918466	0.906882	0.808947	0.920273	0.873614	0.858661	0.516132	0.935797	0.910771	0.869695	0.731966	0.951863	0.888396	0.875039	0.792235	0.946502	0.578586	0.9496	0.94923
	407-438	HT7	0.246915	0.407012	0.84707	0.888607	0.415664	-0.222215	0.741274	0.818839	0.364622	0.103525	0.795017	0.796201	0.441992	0.114857	0.851131	0.847124	0.29095	0.112602	0.849192	0.723955	0.62148	-0.226967	0.835532	0.891668	0.716622	0.434152	0.775228	0.880328	0.802125	0.784734	0.775228	0.870364	0.802739	0.911902	0.599553	0.89181	0.854624	0.854857	0.693595	0.874896	0.864558	0.875291	0.687297	0.896038	0.616224	0.922454	0.894266
		77G7	0.0895844	0.30336	0.836398	0.884992	0.248288	-0.276467	0.761692	0.824539	0.236348	-0.105195	0.766139	0.769535	0.399375	-0.016503	0.858336	0.889391	0.335527	0.13449	0.85054	0.843893	0.536665	-0.432911	0.779761	0.907791	0.67063	0.320009	0.749102	0.890691	0.839638	0.781462	0.749102	0.896865	0.806609	0.86014	0.467278	0.919552	0.863828	0.849877	0.631626	0.916491	0.875494	0.877497	0.753081	0.934822	0.514809	0.905271	0.934016
		TauAB	0.115486	0.349924	0.910037	0.91932	0.298965	-0.257626	0.806158	0.867747	0.396601	-0.0999648	0.857895	0.808744	0.427281	-0.0388659	0.88081	0.869874	0.348622	0.161037	0.885529	0.830557	0.661313	-0.513114	0.85292	0.928131	0.781132	0.439982	0.829517	0.923245	0.919565	0.913729	0.829517	0.929188	0.886196	0.898226	0.558047	0.946232	0.924644	0.88909	0.760254	0.958512	0.906356	0.894802	0.796774	0.958948	0.61293	0.967428	0.956679
			Tau12	HT7	77G7	TauAB	Tau12	HT7	77G7	TauAB	Tau12	HT7	77G7	TauAB	Tau12	HT7	77G7	TauAB	Tau12	HT7	77G7	TauAB	Tau12	HT7	77G7	TauAB	Tau12	HT7	77G7	TauAB	Tau12	HT7	77G7	TauAB	Tau12	HT7	77G7	TauAB	Tau12	HT7	77G7	TauAB	Tau12	HT7	77G7	TauAB	HT7	77G7	TauAB
			6-23				25-44				45-68 0N				68-97 1N				68-87 2N				212-221				243-254				275-286 3R				299-317 4R				354-369				407-438				6-23
			TBS																																												SI
[truncated: 33 more columns]

## Sheet: b) AD
b)
			TBS																																												SI
			6-23				25-44				45-68 0N				68-97 1N				68-87 2N				212-221				243-254				275-286 3R				299-317 4R				354-369				407-438				6-23
		AD	Tau12	HT7	77G7	TauAB	Tau12	HT7	77G7	TauAB	Tau12	HT7	77G7	TauAB	Tau12	HT7	77G7	TauAB	Tau12	HT7	77G7	TauAB	Tau12	HT7	77G7	TauAB	Tau12	HT7	77G7	TauAB	Tau12	HT7	77G7	TauAB	Tau12	HT7	77G7	TauAB	Tau12	HT7	77G7	TauAB	Tau12	HT7	77G7	TauAB	HT7	77G7	TauAB
TBS	6-23	Tau12	1	0.924862	0.673988	0.371733	0.791652	0.787262	0.712161	0.205485	0.952619	0.906055	0.686583	0.46364	0.946053	0.914922	0.666162	0.394667	0.761205	0.749433	0.687454	0.770966	0.912756	0.894305	0.719408	0.3628	0.920725	0.74313	0.792183	0.182088	0.779509	0.557614	0.792183	0.1526	0.596111	-0.0381435	0.822582	0.124121	0.342093	0.0673711	0.42749	0.101488	0.539876	0.433237	0.608442	0.401812	-0.25186	-0.178741	-0.196712
		HT7	0.924862	1	0.859303	0.593817	0.745162	0.69916	0.872976	0.420346	0.915467	0.866284	0.84441	0.68386	0.917848	0.886829	0.873023	0.616913	0.658143	0.676101	0.840562	0.847604	0.985703	0.901775	0.896667	0.626839	0.910439	0.723657	0.860276	0.154436	0.755816	0.509234	0.860276	0.10019	0.679575	-0.0218879	0.75991	0.0804578	0.330993	-0.00549048	0.357219	0.0254362	0.765992	0.684433	0.819195	0.671359	-0.230499	-0.124577	-0.0569416
		77G7	0.673988	0.859303	1	0.836428	0.44228	0.375746	0.970233	0.505375	0.756287	0.756295	0.978987	0.920645	0.625114	0.597334	0.979978	0.828441	0.328966	0.384499	0.818969	0.843889	0.879003	0.71206	0.990612	0.91029	0.728042	0.629307	0.857881	0.17037	0.607961	0.394655	0.857881	0.0822479	0.732129	0.0606124	0.614389	0.12488	0.322689	0.01862	0.306336	-0.0121948	0.975259	0.947673	0.987859	0.90959	-0.246905	-0.067147	-0.0389887
		TauAB	0.371733	0.593817	0.836428	1	0.0650655	0.200116	0.827489	0.748168	0.478851	0.441178	0.772473	0.945862	0.275797	0.221984	0.798098	0.952025	0.128517	0.151689	0.663589	0.758653	0.562485	0.335922	0.778827	0.863877	0.606293	0.639817	0.814357	0.574229	0.646453	0.602131	0.814357	0.50032	0.864585	0.428648	0.458239	0.534064	0.646519	0.429138	0.561637	0.406241	0.807454	0.833389	0.815244	0.815426	0.124478	0.393391	0.225115
	25-44	Tau12	0.791652	0.745162	0.44228	0.0650655	1	0.832537	0.526142	-0.0772099	0.684874	0.680218	0.444686	0.234152	0.905833	0.910754	0.534988	0.199095	0.810202	0.82504	0.554954	0.615225	0.777001	0.810331	0.538408	0.243965	0.604621	0.266591	0.410858	-0.244221	0.478752	0.16379	0.410858	-0.202887	0.19773	-0.510475	0.398477	-0.315289	-0.0469423	-0.354568	-0.0362489	-0.294606	0.38919	0.305453	0.41734	0.325366	-0.309347	-0.579794	-0.388313
		HT7	0.787262	0.69916	0.375746	0.200116	0.832537	1	0.515805	0.107282	0.695987	0.693387	0.377103	0.310951	0.810847	0.847124	0.425652	0.271094	0.978971	0.967065	0.679163	0.724597	0.666254	0.718674	0.454509	0.164578	0.706306	0.40883	0.565006	0.174097	0.614755	0.43611	0.565006	0.243453	0.434857	-0.167868	0.554143	0.115256	0.346054	0.0236228	0.389643	0.146498	0.238913	0.198374	0.324764	0.210476	0.0176414	-0.129521	-0.090848
		77G7	0.712161	0.872976	0.970233	0.827489	0.526142	0.515805	1	0.443772	0.742434	0.75966	0.929294	0.903225	0.686208	0.666637	0.966864	0.865513	0.455887	0.503992	0.865162	0.918826	0.887269	0.778747	0.97387	0.904232	0.740233	0.610319	0.866979	0.206298	0.645967	0.426255	0.866979	0.146154	0.737095	0.0139597	0.640158	0.165371	0.364037	0.0251167	0.362725	0.0397215	0.936717	0.921184	0.936466	0.909292	-0.253434	-0.0957146	-0.121233
		TauAB	0.205485	0.420346	0.505375	0.748168	-0.0772099	0.107282	0.443772	1	0.305927	0.135827	0.425005	0.632218	0.111358	0.0342651	0.488309	0.646291	0.102927	0.0895857	0.499573	0.456031	0.31407	0.0510571	0.458506	0.473977	0.524992	0.554516	0.590911	0.627479	0.595687	0.660816	0.59091	0.584199	0.766456	0.701335	0.265652	0.53855	0.687965	0.526296	0.53829	0.524406	0.444743	0.434392	0.503001	0.461027	0.43294	0.761801	0.785346
	45-68 0N	Tau12	0.952619	0.915467	0.756287	0.478851	0.684874	0.695987	0.742434	0.305927	1	0.964398	0.805928	0.600417	0.853698	0.835365	0.716487	0.423999	0.670609	0.675986	0.707297	0.769355	0.90881	0.806994	0.778468	0.431532	0.934133	0.785252	0.86022	0.230789	0.763141	0.562268	0.86022	0.17724	0.680885	0.0394913	0.826264	0.177483	0.398796	0.136383	0.46122	0.118487	0.620973	0.527468	0.721811	0.444142	-0.170314	-0.0907849	-0.08171
		HT7	0.906055	0.866284	0.756295	0.441178	0.680218	0.693387	0.75966	0.135827	0.964398	1	0.829767	0.611501	0.820944	0.842768	0.710798	0.393392	0.661083	0.688755	0.719553	0.761139	0.88714	0.830254	0.782857	0.46482	0.835819	0.672328	0.815791	0.116702	0.622357	0.402002	0.815791	0.0653702	0.589018	-0.109479	0.808101	0.0914854	0.285369	0.0170323	0.382796	0.00235936	0.63705	0.571573	0.731297	0.469059	-0.238962	-0.202366	-0.195198
		77G7	0.686583	0.84441	0.978987	0.772473	0.444686	0.377103	0.929294	0.425005	0.805928	0.829767	1	0.896993	0.621501	0.615897	0.942334	0.726092	0.333476	0.395692	0.791502	0.799775	0.875128	0.702113	0.969639	0.845421	0.724587	0.62279	0.848249	0.124109	0.556305	0.340141	0.848249	0.0284685	0.690489	0.0055246	0.637207	0.0883686	0.277853	-0.00557374	0.282511	-0.0588766	0.941833	0.913587	0.982632	0.835805	-0.229194	-0.0979499	-0.0490497
		TauAB	0.46364	0.68386	0.920645	0.945862	0.234152	0.310951	0.903225	0.632218	0.600417	0.611501	0.896993	1	0.384346	0.370633	0.884805	0.891716	0.251553	0.306798	0.774876	0.817932	0.683539	0.46873	0.883089	0.910854	0.625141	0.569976	0.836992	0.373765	0.576458	0.456533	0.836992	0.306798	0.816489	0.231065	0.49307	0.339609	0.510092	0.226397	0.441281	0.191342	0.897221	0.921464	0.922908	0.873853	-0.0134864	0.170809	0.133818
	68-97 1N	Tau12	0.946053	0.917848	0.625114	0.275797	0.905833	0.810847	0.686208	0.111358	0.853698	0.820944	0.621501	0.384346	1	0.979704	0.671551	0.358679	0.767065	0.767058	0.678533	0.714659	0.916326	0.939179	0.696716	0.361965	0.821451	0.585259	0.665076	-0.014631	0.664399	0.387152	0.665076	-0.0324494	0.430862	-0.260831	0.696824	-0.0814327	0.151757	-0.150443	0.217945	-0.0873235	0.526964	0.426914	0.571087	0.431661	-0.308342	-0.343373	-0.27485
		HT7	0.914922	0.886829	0.597334	0.221984	0.910754	0.847124	0.666637	0.0342651	0.835365	0.842768	0.615897	0.370633	0.979704	1	0.646442	0.299468	0.814614	0.829632	0.722141	0.703113	0.893208	0.939361	0.68044	0.339767	0.762381	0.48745	0.620723	-0.0957682	0.556161	0.272144	0.620723	-0.104473	0.357921	-0.351387	0.66724	-0.154124	0.0741863	-0.24336	0.160555	-0.165915	0.497082	0.416884	0.558345	0.409193	-0.275469	-0.365626	-0.246622
		77G7	0.666162	0.873023	0.979978	0.798098	0.534988	0.425652	0.966864	0.488309	0.716487	0.710798	0.942334	0.884805	0.671551	0.646442	1	0.836279	0.381621	0.439618	0.839391	0.857765	0.897173	0.732929	0.99025	0.916025	0.699299	0.541858	0.792271	0.0792161	0.583945	0.332957	0.792271	0.00684118	0.657099	-0.0585263	0.518002	0.0149407	0.235732	-0.0932208	0.194078	-0.103579	0.971175	0.944355	0.974209	0.9331	-0.221134	-0.144173	-0.0519962
		TauAB	0.394667	0.616913	0.828441	0.952025	0.199095	0.271094	0.865513	0.646291	0.423999	0.393392	0.726092	0.891716	0.358679	0.299468	0.836279	1	0.202191	0.225841	0.686596	0.816134	0.60245	0.423883	0.796227	0.908678	0.561708	0.531841	0.738888	0.44917	0.628619	0.525481	0.738888	0.399257	0.765163	0.258958	0.375407	0.398132	0.523864	0.27229	0.434507	0.286875	0.827545	0.852293	0.792538	0.883309	0.0346592	0.217543	0.0661508
	68-87 2N	Tau12	0.761205	0.658143	0.328966	0.128517	0.810202	0.978971	0.455887	0.102927	0.670609	0.661083	0.333476	0.251553	0.767065	0.814614	0.381621	0.202191	1	0.991003	0.680351	0.694439	0.627567	0.674499	0.41712	0.111794	0.6595	0.329138	0.494993	0.109701	0.552555	0.376591	0.494993	0.190503	0.373124	-0.167554	0.486121	0.0419673	0.281788	-0.0373289	0.326401	0.0885138	0.191876	0.147255	0.28671	0.163165	0.0543033	-0.115215	-0.005938
		HT7	0.749433	0.676101	0.384499	0.151689	0.82504	0.967065	0.503992	0.0895857	0.675986	0.688755	0.395692	0.306798	0.767058	0.829632	0.439618	0.225841	0.991003	1	0.732049	0.714776	0.658653	0.70146	0.475406	0.184001	0.633204	0.280933	0.49717	0.0303313	0.49707	0.296705	0.49717	0.107282	0.35647	-0.230205	0.468728	-0.0339207	0.219049	-0.124976	0.261456	-0.00450073	0.262769	0.227153	0.354748	0.237337	0.00983469	-0.171507	-0.0144056
		77G7	0.687454	0.840562	0.818969	0.663589	0.554954	0.679163	0.865162	0.499573	0.707297	0.719553	0.791502	0.774876	0.678533	0.722141	0.839391	0.686596	0.680351	0.732049	1	0.875708	0.815932	0.748896	0.860967	0.715492	0.702859	0.461239	0.770753	0.147563	0.530491	0.340174	0.770753	0.130833	0.646375	0.0242259	0.58376	0.0851411	0.324384	-0.071581	0.33857	0.0163866	0.742634	0.740312	0.80489	0.748386	-0.0364083	0.070062	0.222886
		TauAB	0.770966	0.847604	0.843889	0.758653	0.615225	0.724597	0.918826	0.456031	0.769355	0.761139	0.799775	0.817932	0.714659	0.703113	0.857765	0.816134	0.694439	0.714776	0.875708	1	0.842526	0.724822	0.86562	0.745517	0.805703	0.602833	0.848525	0.338543	0.761532	0.564968	0.848525	0.33267	0.76458	0.0502547	0.596373	0.272576	0.495443	0.146716	0.477963	0.195165	0.764945	0.748141	0.799532	0.745764	-0.0161819	0.00246911	-0.0406593
	212-221	Tau12	0.912756	0.985703	0.879003	0.562485	0.777001	0.666254	0.887269	0.31407	0.90881	0.88714	0.875128	0.683539	0.916326	0.893208	0.897173	0.60245	0.627567	0.658653	0.815932	0.842526	1	0.916263	0.920055	0.662565	0.857146	0.652475	0.815764	0.0378295	0.688195	0.405051	0.815764	-0.0185086	0.60543	-0.147887	0.709516	-0.0295368	0.218213	-0.113375	0.246971	-0.100802	0.808489	0.729186	0.848311	0.705407	-0.303954	-0.260831	-0.171366
		HT7	0.894305	0.901775	0.71206	0.335922	0.810331	0.718674	0.778747	0.0510571	0.806994	0.830254	0.702113	0.46873	0.939179	0.939361	0.732929	0.423883	0.674499	0.70146	0.748896	0.724822	0.916263	1	0.774173	0.506187	0.733095	0.531394	0.686669	-0.0892755	0.541014	0.264189	0.68667	-0.122745	0.426102	-0.260881	0.755391	-0.119268	0.0863552	-0.240927	0.199608	-0.168367	0.64082	0.564737	0.650813	0.573124	-0.506718	-0.389404	-0.339959
		77G7	0.719408	0.896667	0.990612	0.778827	0.538408	0.454509	0.97387	0.458506	0.778468	0.782857	0.969639	0.883089	0.696716	0.68044	0.99025	0.796227	0.41712	0.475406	0.860967	0.86562	0.920055	0.774173	1	0.889402	0.736398	0.585742	0.8329	0.0902543	0.592938	0.347673	0.8329	0.0138508	0.67963	-0.0329797	0.603682	0.0360454	0.254562	-0.0759379	0.244789	-0.0876988	0.963863	0.931271	0.979867	0.903633	-0.257237	-0.135192	-0.0558447
		TauAB	0.3628	0.626839	0.91029	0.863877	0.243965	0.164578	0.904232	0.473977	0.431532	0.46482	0.845421	0.910854	0.361965	0.339767	0.916025	0.908678	0.111794	0.184001	0.715492	0.745517	0.662565	0.506187	0.889402	1	0.436203	0.365065	0.659265	0.104419	0.393738	0.212047	0.659265	0.0332193	0.597984	0.0176467	0.329417	0.074524	0.219716	-0.0572141	0.155149	-0.076676	0.958424	0.98497	0.909172	0.989751	-0.229271	-0.0741864	-0.0598625
	243-254	Tau12	0.920725	0.910439	0.728042	0.606293	0.604621	0.706306	0.740233	0.524992	0.934133	0.835819	0.724587	0.625141	0.821451	0.762381	0.699299	0.561708	0.6595	0.633204	0.702859	0.805703	0.857146	0.733095	0.736398	0.436203	1	0.901632	0.918424	0.488264	0.924902	0.788208	0.918424	0.44119	0.824392	0.264717	0.83168	0.415294	0.625962	0.370433	0.647873	0.384144	0.576189	0.485943	0.668177	0.445938	-0.00944224	0.148769	0.0584836
		HT7	0.74313	0.723657	0.629307	0.639817	0.266591	0.40883	0.610319	0.554516	0.785252	0.672328	0.62279	0.569976	0.585259	0.48745	0.541858	0.531841	0.329138	0.280933	0.461239	0.602833	0.652475	0.531394	0.585742	0.365065	0.901632	1	0.892316	0.68643	0.892311	0.874084	0.892316	0.598454	0.860788	0.527473	0.864229	0.652379	0.751056	0.62687	0.793667	0.601613	0.481627	0.397621	0.551056	0.340456	-0.0257866	0.3412	0.0616841
		77G7	0.792183	0.860276	0.857881	0.814357	0.410858	0.565006	0.866979	0.590911	0.86022	0.815791	0.848249	0.836992	0.665076	0.620723	0.792271	0.738888	0.494993	0.49717	0.770753	0.848525	0.815764	0.686669	0.8329	0.659265	0.918424	0.892316	1	0.558294	0.849511	0.7493	1	0.48955	0.932362	0.368287	0.857969	0.522472	0.698443	0.426466	0.722921	0.426101	0.736495	0.693624	0.802229	0.640357	-0.0817806	0.22775	0.0678161
		TauAB	0.182088	0.154436	0.17037	0.574229	-0.244221	0.174097	0.206298	0.627479	0.230789	0.116702	0.124109	0.373765	-0.014631	-0.0957682	0.0792161	0.44917	0.109701	0.0303313	0.147563	0.338543	0.0378295	-0.0892755	0.0902543	0.104419	0.488264	0.68643	0.558294	1	0.67522	0.884242	0.558294	0.983438	0.757164	0.829116	0.434502	0.987256	0.958147	0.96712	0.926664	0.978513	0.0368276	0.0458158	0.0971793	0.0264341	0.477222	0.817154	0.374308
	275-286 3R	Tau12	0.779509	0.755816	0.607961	0.646453	0.478752	0.614755	0.645967	0.595687	0.763141	0.622357	0.556305	0.576458	0.664399	0.556161	0.583945	0.628619	0.552555	0.49707	0.530491	0.761532	0.688195	0.541014	0.592938	0.393738	0.924902	0.892311	0.849511	0.67522	1	0.929543	0.849511	0.652528	0.868275	0.421874	0.6991	0.600066	0.780848	0.580616	0.744594	0.589455	0.473427	0.391049	0.526195	0.386079	0.0812595	0.271308	0.0298287
		HT7	0.557614	0.509234	0.394655	0.602131	0.16379	0.43611	0.426255	0.660816	0.562268	0.402002	0.340141	0.456533	0.387152	0.272144	0.332957	0.525481	0.376591	0.296705	0.340174	0.564968	0.405051	0.264189	0.347673	0.212047	0.788208	0.874084	0.7493	0.884242	0.929543	1	0.7493	0.865138	0.867026	0.69113	0.631954	0.831003	0.92923	0.828719	0.894646	0.837471	0.244096	0.183908	0.305816	0.176848	0.264214	0.583545	0.225334
		77G7	0.792183	0.860276	0.857881	0.814357	0.410858	0.565006	0.866979	0.59091	0.86022	0.815791	0.848249	0.836992	0.665076	0.620723	0.792271	0.738888	0.494993	0.49717	0.770753	0.848525	0.815764	0.68667	0.8329	0.659265	0.918424	0.892316	1	0.558294	0.849511	0.7493	1	0.48955	0.932362	0.368287	0.857969	0.522472	0.698443	0.426466	0.722921	0.426101	0.736495	0.693624	0.802229	0.640357	-0.0817808	0.22775	0.0678158
		TauAB	0.1526	0.10019	0.0822479	0.50032	-0.202887	0.243453	0.146154	0.584199	0.17724	0.0653702	0.0284685	0.306798	-0.0324494	-0.104473	0.00684118	0.399257	0.190503	0.107282	0.130833	0.33267	-0.0185086	-0.122745	0.0138508	0.0332193	0.44119	0.598454	0.48955	0.983438	0.652528	0.865138	0.48955	1	0.709643	0.794061	0.363372	0.96769	0.953115	0.948501	0.910555	0.980999	-0.0518495	-0.0364821	0.00697662	-0.0389664	0.522945	0.810321	0.377045
	299-317 4R	Tau12	0.596111	0.679575	0.732129	0.864585	0.19773	0.434857	0.737095	0.766456	0.680885	0.589018	0.690489	0.816489	0.430862	0.357921	0.657099	0.765163	0.373124	0.35647	0.646375	0.76458	0.60543	0.426102	0.67963	0.597984	0.824392	0.860788	0.932362	0.757164	0.868275	0.867026	0.932362	0.709643	1	0.619081	0.71265	0.716467	0.876057	0.649893	0.834969	0.641011	0.617679	0.591512	0.674978	0.5597	0.0950887	0.496529	0.264568
		HT7	-0.0381435	-0.0218879	0.0606124	0.428648	-0.510475	-0.167868	0.0139597	0.701335	0.0394913	-0.109479	0.0055246	0.231065	-0.260831	-0.351387	-0.0585263	0.258958	-0.167554	-0.230205	0.0242259	0.0502547	-0.147887	-0.260881	-0.0329797	0.0176467	0.264717	0.527473	0.368287	0.829116	0.421874	0.69113	0.368287	0.794061	0.619081	1	0.311171	0.828683	0.791983	0.848668	0.761401	0.835451	-0.033053	-0.0402386	0.00575476	-0.038694	0.304165	0.883868	0.597988
		77G7	0.822582	0.75991	0.614389	0.458239	0.398477	0.554143	0.640158	0.265652	0.826264	0.808101	0.637207	0.49307	0.696824	0.66724	0.518002	0.375407	0.486121	0.468728	0.58376	0.596373	0.709516	0.755391	0.603682	0.329417	0.83168	0.864229	0.857969	0.434502	0.6991	0.631954	0.857969	0.363372	0.71265	0.311171	1	0.444869	0.548653	0.351929	0.702416	0.381768	0.461979	0.389421	0.526443	0.332156	-0.312777	0.119924	-0.0954905
		TauAB	0.124121	0.0804578	0.12488	0.534064	-0.315289	0.115256	0.165371	0.53855	0.177483	0.0914854	0.0883686	0.339609	-0.0814327	-0.154124	0.0149407	0.398132	0.0419673	-0.0339207	0.0851411	0.272576	-0.0295368	-0.119268	0.0360454	0.074524	0.415294	0.652379	0.522472	0.987256	0.600066	0.831003	0.522472	0.96769	0.716467	0.828683	0.444869	1	0.936611	0.971207	0.931537	0.978396	-0.00239507	0.0171177	0.0476089	-0.0117248	0.39829	0.782319	0.300911
	354-369	Tau12	0.342093	0.330993	0.322689	0.646519	-0.0469423	0.346054	0.364037	0.687965	0.398796	0.285369	0.277853	0.510092	0.151757	0.0741863	0.235732	0.523864	0.281788	0.219049	0.324384	0.495443	0.218213	0.0863552	0.254562	0.219716	0.625962	0.751056	0.698443	0.958147	0.780848	0.92923	0.698443	0.953115	0.876057	0.791983	0.548653	0.936611	1	0.90558	0.956407	0.91929	0.182975	0.178018	0.250039	0.158742	0.362181	0.746074	0.360866
		HT7	0.0673711	-0.00549048	0.01862	0.429138	-0.354568	0.0236228	0.0251167	0.526296	0.136383	0.0170323	-0.00557374	0.226397	-0.150443	-0.24336	-0.0932208	0.27229	-0.0373289	-0.124976	-0.071581	0.146716	-0.113375	-0.240927	-0.0759379	-0.0572141	0.370433	0.62687	0.426466	0.96712	0.580616	0.828719	0.426466	0.948501	0.649893	0.848668	0.351929	0.971207	0.90558	1	0.873008	0.970596	-0.104472	-0.105309	-0.0473852	-0.145493	0.444643	0.787438	0.320502
		77G7	0.42749	0.357219	0.306336	0.561637	-0.0362489	0.389643	0.362725	0.53829	0.46122	0.382796	0.282511	0.441281	0.217945	0.160555	0.194078	0.434507	0.326401	0.261456	0.33857	0.477963	0.246971	0.199608	0.244789	0.155149	0.647873	0.793667	0.722921	0.926664	0.744594	0.894646	0.722921	0.910555	0.834969	0.761401	0.702416	0.931537	0.956407	0.873008	1	0.907594	0.141139	0.12977	0.213816	0.0965607	0.219358	0.653154	0.245346
		TauAB	0.101488	0.0254362	-0.0121948	0.406241	-0.294606	0.146498	0.0397215	0.524406	0.118487	0.00235936	-0.0588766	0.191342	-0.0873235	-0.165915	-0.103579	0.286875	0.0885138	-0.00450073	0.0163866	0.195165	-0.100802	-0.168367	-0.0876988	-0.076676	0.384144	0.601613	0.426101	0.978513	0.589455	0.837471	0.426101	0.980999	0.641011	0.835451	0.381768	0.978396	0.91929	0.970596	0.907594	1	-0.149818	-0.142585	-0.0946277	-0.14783	0.458435	0.808646	0.353655
	407-438	Tau12	0.539876	0.765992	0.975259	0.807454	0.38919	0.238913	0.936717	0.444743	0.620973	0.63705	0.941833	0.897221	0.526964	0.497082	0.971175	0.827545	0.191876	0.262769	0.742634	0.764945	0.808489	0.64082	0.963863	0.958424	0.576189	0.481627	0.736495	0.0368276	0.473427	0.244096	0.736495	-0.0518495	0.617679	-0.033053	0.461979	-0.00239507	0.182975	-0.104472	0.141139	-0.149818	1	0.984755	0.976513	0.961046	-0.326262	-0.178102	-0.111328
		HT7	0.433237	0.684433	0.947673	0.833389	0.305453	0.198374	0.921184	0.434392	0.527468	0.571573	0.913587	0.921464	0.426914	0.416884	0.944355	0.852293	0.147255	0.227153	0.740312	0.748141	0.729186	0.564737	0.931271	0.98497	0.485943	0.397621	0.693624	0.0458158	0.391049	0.183908	0.693624	-0.0364821	0.591512	-0.0402386	0.389421	0.0171177	0.178018	-0.105309	0.12977	-0.142585	0.984755	1	0.957688	0.976219	-0.259814	-0.132147	-0.0771504
		77G7	0.608442	0.819195	0.987859	0.815244	0.41734	0.324764	0.936466	0.503001	0.721811	0.731297	0.982632	0.922908	0.571087	0.558345	0.974209	0.792538	0.28671	0.354748	0.80489	0.799532	0.848311	0.650813	0.979867	0.909172	0.668177	0.551056	0.802229	0.0971793	0.526195	0.305816	0.802229	0.00697662	0.674978	0.00575476	0.526443	0.0476089	0.250039	-0.0473852	0.213816	-0.0946277	0.976513	0.957688	1	0.9064	-0.195728	-0.0827645	0.0127428
		TauAB	0.401812	0.671359	0.90959	0.815426	0.325366	0.210476	0.909292	0.461027	0.444142	0.469059	0.835805	0.873853	0.431661	0.409193	0.9331	0.883309	0.163165	0.237337	0.748386	0.745764	0.705407	0.573124	0.903633	0.989751	0.445938	0.340456	0.640357	0.0264341	0.386079	0.176848	0.640357	-0.0389664	0.5597	-0.038694	0.332156	-0.0117248	0.158742	-0.145493	0.0965607	-0.14783	0.961046	0.976219	0.9064	1	-0.289789	-0.138571	-0.0692922
SI	6-23	HT7	-0.25186	-0.230499	-0.246905	0.124478	-0.309347	0.0176414	-0.253434	0.43294	-0.170314	-0.238962	-0.229194	-0.0134864	-0.308342	-0.275469	-0.221134	0.0346592	0.0543033	0.00983469	-0.0364083	-0.0161819	-0.303954	-0.506718	-0.257237	-0.229271	-0.00944224	-0.0257866	-0.0817806	0.477222	0.0812595	0.264214	-0.0817808	0.522945	0.0950887	0.304165	-0.312777	0.39829	0.362181	0.444643	0.219358	0.458435	-0.326262	-0.259814	-0.195728	-0.289789	1	0.687909	0.675771
		77G7	-0.178741	-0.124577	-0.067147	0.393391	-0.579794	-0.129521	-0.0957146	0.761801	-0.0907849	-0.202366	-0.0979499	0.170809	-0.343373	-0.365626	-0.144173	0.217543	-0.115215	-0.171507	0.070062	0.00246911	-0.260831	-0.389404	-0.135192	-0.0741864	0.148769	0.3412	0.22775	0.817154	0.271308	0.583545	0.22775	0.810321	0.496529	0.883868	0.119924	0.782319	0.746074	0.787438	0.653154	0.808646	-0.178102	-0.132147	-0.0827645	-0.138571	0.687909	1	0.807656
		TauAB	-0.196712	-0.0569416	-0.0389887	0.225115	-0.388313	-0.090848	-0.121233	0.785346	-0.08171	-0.195198	-0.0490497	0.133818	-0.27485	-0.246622	-0.0519962	0.0661508	-0.005938	-0.0144056	0.222886	-0.0406593	-0.171366	-0.339959	-0.0558447	-0.0598625	0.0584836	0.0616841	0.0678161	0.374308	0.0298287	0.225334	0.0678158	0.377045	0.264568	0.597988	-0.0954905	0.300911	0.360866	0.320502	0.245346	0.353655	-0.111328	-0.0771504	0.0127428	-0.0692922	0.675771	0.807656	1
	25-44	HT7	0.343127	0.234621	0.00445207	0.159994	0.105043	0.460156	0.01992	0.495658	0.360189	0.238645	0.0223358	0.0704385	0.20277	0.212464	0.000231169	0.0800544	0.527895	0.458166	0.281046	0.339098	0.138019	-0.00434238	0.0240905	-0.21263	0.50014	0.395439	0.310811	0.579089	0.55042	0.635911	0.310811	0.628109	0.417218	0.406914	0.218555	0.475966	0.577433	0.511354	0.519757	0.56198	-0.17682	-0.203877	-0.00920211	-0.235473	0.750068	0.615331	0.591715
		77G7	0.0117492	-0.0403781	-0.0983828	0.208364	-0.370712	0.125987	-0.100962	0.617576	0.0755428	-0.0178463	-0.10062	0.0863883	-0.195036	-0.180027	-0.188264	0.0357206	0.19628	0.144426	0.193385	0.0894475	-0.172649	-0.226305	-0.132719	-0.206201	0.233855	0.313699	0.255679	0.709875	0.291371	0.563987	0.255679	0.749466	0.48213	0.821741	0.248453	0.680927	0.718322	0.679907	0.686625	0.734668	-0.253798	-0.232627	-0.125876	-0.247607	0.561779	0.88026	0.77897
		TauAB	-0.350637	-0.354582	-0.295102	0.0913057	-0.667907	-0.257931	-0.344614	0.5658	-0.267344	-0.365768	-0.307072	-0.0825724	-0.533382	-0.530392	-0.370484	-0.0739627	-0.166564	-0.213018	-0.0861462	-0.208157	-0.467147	-0.564822	-0.345855	-0.283295	-0.105992	0.0439473	-0.061932	0.578331	-0.0179404	0.314277	-0.061932	0.604967	0.207038	0.798059	-0.117868	0.554335	0.491969	0.596396	0.423841	0.612551	-0.380652	-0.334595	-0.289118	-0.337427	0.657938	0.904284	0.839702
	45-68 0N	HT7	-0.16001	-0.179135	-0.245439	0.0411968	-0.201547	0.162578	-0.253027	0.382796	-0.0524033	-0.100139	-0.190381	-0.0112763	-0.240533	-0.173349	-0.23651	-0.0876797	0.221698	0.189517	0.0514873	0.0179313	-0.251981	-0.431867	-0.242285	-0.297839	0.0449675	-0.0339605	-0.0387596	0.41906	0.0710741	0.237681	-0.0387597	0.485172	0.115294	0.274716	-0.225488	0.348227	0.367437	0.394267	0.248897	0.411871	-0.353474	-0.293486	-0.184915	-0.350876	0.949361	0.63837	0.705513
		77G7	-0.149619	-0.222021	-0.262432	0.0778995	-0.448977	0.00980472	-0.299902	0.505035	-0.0291111	-0.113246	-0.215553	-0.0316212	-0.348277	-0.321767	-0.344585	-0.136201	0.0765538	0.0223326	-0.0239283	-0.0834196	-0.333131	-0.462436	-0.302702	-0.369803	0.09831	0.185126	0.0798299	0.659065	0.159168	0.452374	0.0798298	0.700152	0.309945	0.702737	0.025477	0.625745	0.61744	0.68581	0.54655	0.683483	-0.406238	-0.371664	-0.246964	-0.436867	0.769144	0.857551	0.779646
		TauAB	-0.348275	-0.26834	-0.270796	-0.011953	-0.430246	-0.152803	-0.365151	0.564568	-0.19818	-0.285182	-0.227222	-0.0605457	-0.418069	-0.368667	-0.286552	-0.209419	-0.0697981	-0.0797867	-0.0123345	-0.253917	-0.362909	-0.537537	-0.28707	-0.3032	-0.111211	-0.106666	-0.137313	0.281555	-0.146532	0.0773543	-0.137314	0.305841	0.0545755	0.466754	-0.272257	0.225049	0.247498	0.296963	0.123794	0.291298	-0.337343	-0.292039	-0.188952	-0.327802	0.755509	0.717764	0.929405
	68-97 1N	HT7	0.0212975	0.0466167	-0.129469	0.0854477	-0.00176567	0.258151	-0.12394	0.533365	0.0266758	-0.0974372	-0.145001	-0.0284192	0.0101553	0.0326942	-0.0574902	0.0618132	0.328381	0.279917	0.191079	0.142963	-0.0449754	-0.214576	-0.0938564	-0.19637	0.199578	0.0576519	0.014152	0.351379	0.243448	0.323205	0.0141519	0.405866	0.133847	0.232627	-0.179837	0.227444	0.295284	0.261446	0.170449	0.335465	-0.232315	-0.219939	-0.0964174	-0.19571	0.887938	0.594442	0.730337
		77G7	-0.198363	-0.193308	-0.222267	0.278541	-0.468005	-0.0242622	-0.195663	0.587306	-0.165197	-0.272562	-0.255441	0.0229622	-0.302074	-0.328612	-0.253987	0.1637	-0.0450867	-0.125933	-0.0648233	-0.020692	-0.322526	-0.43588	-0.272918	-0.211336	0.113474	0.27585	0.113831	0.830381	0.300839	0.594914	0.113831	0.854925	0.365052	0.697336	-0.00213201	0.784026	0.715433	0.80117	0.603284	0.841128	-0.335698	-0.282022	-0.243961	-0.277813	0.825771	0.910277	0.644751
		TauAB	-0.446429	-0.385116	-0.356555	0.0585907	-0.617452	-0.295997	-0.409272	0.593857	-0.38142	-0.504769	-0.383785	-0.148614	-0.530865	-0.536046	-0.365523	-0.0610886	-0.22455	-0.274203	-0.153921	-0.275133	-0.495484	-0.645143	-0.390699	-0.297625	-0.175845	-0.0663297	-0.196829	0.483211	-0.0711595	0.223024	-0.196829	0.507321	0.0587914	0.625992	-0.335195	0.423398	0.350391	0.484863	0.223642	0.506689	-0.411135	-0.359162	-0.323433	-0.336979	0.828404	0.865775	0.873393
	68-87 2N	HT7	0.225214	0.234999	0.00192064	0.0221251	0.350493	0.638059	0.0854317	0.328778	0.195152	0.16514	-0.00177462	0.0819732	0.25596	0.35474	0.0866026	0.0511418	0.722526	0.720676	0.523029	0.37473	0.165795	0.137721	0.0843634	-0.0779439	0.254781	-0.0638857	0.11641	0.100192	0.181697	0.14536	0.11641	0.20864	0.141225	-0.0253235	-0.00814393	0.00690154	0.188133	-0.0532362	0.134427	0.0988819	-0.105677	-0.0787911	0.0269643	-0.0373146	0.565609	0.295463	0.568086
		77G7	0.228917	0.263308	0.117502	0.275487	0.176875	0.592573	0.195397	0.528354	0.246173	0.214794	0.109769	0.279463	0.189163	0.277105	0.15352	0.242024	0.650411	0.641175	0.586499	0.467249	0.169479	0.103248	0.16142	0.0450289	0.357899	0.137186	0.310386	0.393783	0.323244	0.363628	0.310385	0.477999	0.398742	0.241365	0.146527	0.311691	0.472555	0.229627	0.40703	0.365618	-0.0168301	0.0303616	0.127949	0.0479016	0.659876	0.544515	0.674422
		TauAB	0.00898558	0.132364	0.0470777	0.132392	0.0377451	0.298683	0.0511271	0.576046	0.0408522	-0.0158309	0.0247802	0.156086	0.0158387	0.101169	0.106404	0.103666	0.410649	0.429319	0.501554	0.221942	0.0497753	-0.0346589	0.0983005	0.034495	0.113135	-0.114927	0.0663057	0.0853696	0.0150482	0.0487255	0.0663054	0.148373	0.154423	0.198743	-0.105319	-0.00440945	0.148404	-0.0549966	0.0676936	0.0655361	-0.0190301	0.0197688	0.0968261	0.0711298	0.560335	0.484946	0.83346
	212-221	HT7	0.207405	0.254482	0.138555	0.481188	-0.0481258	0.400187	0.188276	0.742569	0.237994	0.138317	0.108171	0.327241	0.127618	0.136257	0.136808	0.392289	0.386893	0.331909	0.409614	0.40053	0.122892	-0.0058976	0.128383	0.0518093	0.480097	0.461101	0.448119	0.773161	0.565075	0.705763	0.448119	0.800052	0.612441	0.559132	0.277368	0.687967	0.77447	0.642682	0.672977	0.730445	-0.0170617	0.0142749	0.117727	0.0192212	0.770812	0.81038	0.690569
		77G7	-0.207635	-0.257775	-0.287979	0.19419	-0.561246	-0.0787352	-0.273869	0.533995	-0.159626	-0.262032	-0.303285	-0.0433262	-0.36928	-0.399759	-0.372937	0.024083	-0.0923438	-0.176707	-0.139431	-0.124708	-0.395896	-0.454932	-0.355501	-0.31878	0.0904378	0.319994	0.124348	0.872736	0.269648	0.622664	0.124348	0.897201	0.396575	0.847372	0.114666	0.86133	0.784463	0.891117	0.712873	0.915833	-0.418238	-0.376088	-0.326004	-0.389872	0.665393	0.93426	0.622571
		TauAB	-0.461136	-0.551715	-0.493625	-0.0985031	-0.737329	-0.300358	-0.506834	0.254508	-0.383358	-0.423115	-0.475344	-0.241356	-0.651171	-0.642196	-0.612877	-0.292818	-0.254692	-0.305637	-0.318342	-0.400772	-0.652073	-0.636174	-0.562657	-0.470295	-0.26223	-0.023915	-0.162091	0.580284	-0.147582	0.245234	-0.162091	0.628057	0.107222	0.775555	-0.0791619	0.624794	0.506741	0.670691	0.485649	0.67171	-0.574153	-0.512859	-0.507515	-0.540201	0.438015	0.770137	0.565411
	243-254	HT7	-0.0155959	-0.294637	-0.473853	-0.297627	-0.278355	0.0771268	-0.481452	0.0202149	0.0292663	-0.0417633	-0.394622	-0.37024	-0.241064	-0.243491	-0.580726	-0.474695	0.139091	0.0536111	-0.314967	-0.224343	-0.368772	-0.379003	-0.502092	-0.682644	0.0805996	0.19112	-0.0433136	0.53435	0.176743	0.438045	-0.0433135	0.599759	0.114471	0.532922	0.113549	0.539965	0.495269	0.65599	0.5132	0.627411	-0.63276	-0.655269	-0.501917	-0.741571	0.447375	0.508765	0.309808
		77G7	-0.124326	-0.377184	-0.481605	-0.299202	-0.409049	-0.0520452	-0.477486	-0.0447503	-0.086924	-0.121078	-0.419797	-0.360844	-0.346422	-0.351854	-0.625577	-0.487625	-0.0150791	-0.0837448	-0.353385	-0.331925	-0.452938	-0.362222	-0.531064	-0.627506	-0.0498951	0.149381	-0.054677	0.501092	0.0411921	0.347134	-0.0546769	0.557909	0.11735	0.625304	0.191761	0.561976	0.491616	0.64076	0.549311	0.621313	-0.608591	-0.615301	-0.530538	-0.681203	0.141393	0.462739	0.207231
		TauAB	-0.209614	-0.453207	-0.503442	-0.43307	-0.387558	-0.125567	-0.51373	-0.230149	-0.159293	-0.144423	-0.424049	-0.407406	-0.409176	-0.384884	-0.642464	-0.604219	-0.0604653	-0.0951428	-0.375284	-0.411917	-0.489357	-0.3666	-0.540553	-0.610705	-0.220696	-0.0699434	-0.19442	0.219997	-0.196507	0.0622656	-0.19442	0.28341	-0.0692522	0.437431	0.071104	0.303635	0.234854	0.377834	0.318224	0.346963	-0.584307	-0.582618	-0.528603	-0.652197	-0.0384156	0.245269	0.109178
	275-286 3R	HT7	-0.0720101	-0.331671	-0.459831	-0.240982	-0.376127	-0.0250399	-0.486111	0.0671854	-0.00755439	-0.0836912	-0.38281	-0.340085	-0.311658	-0.324687	-0.576587	-0.433318	0.032226	-0.0540319	-0.357158	-0.253719	-0.404904	-0.444944	-0.502979	-0.648341	0.0555356	0.209681	-0.0440815	0.578447	0.166866	0.450872	-0.0440814	0.627195	0.132684	0.590198	0.0875706	0.585546	0.515145	0.709152	0.521514	0.660206	-0.609383	-0.626686	-0.484052	-0.720249	0.482179	0.565184	0.335679
		77G7	-0.131842	-0.403268	-0.506402	-0.322966	-0.368223	0.00599987	-0.476483	-0.137713	-0.10318	-0.110601	-0.439351	-0.368066	-0.345899	-0.335358	-0.641633	-0.489707	0.0407671	-0.0250104	-0.351256	-0.298208	-0.467022	-0.362364	-0.54863	-0.632919	-0.0805094	0.0891327	-0.0825981	0.478343	0.0149917	0.307581	-0.082598	0.552987	0.0773571	0.5375	0.153647	0.544322	0.467967	0.610481	0.529939	0.600564	-0.6311	-0.623583	-0.55438	-0.692204	0.164725	0.408145	0.139386
		TauAB	-0.250023	-0.502853	-0.556054	-0.369374	-0.503873	-0.181374	-0.573699	-0.104584	-0.196795	-0.223231	-0.48677	-0.428876	-0.478879	-0.477729	-0.695318	-0.553338	-0.117166	-0.179404	-0.448208	-0.423625	-0.559848	-0.496756	-0.606577	-0.664683	-0.186748	0.0112197	-0.192215	0.411801	-0.0982129	0.217337	-0.192215	0.470145	-0.0138565	0.57556	0.0261113	0.472467	0.367845	0.571772	0.417418	0.53172	-0.657922	-0.65485	-0.585425	-0.727017	0.198895	0.443257	0.227778
	299-317 4R	HT7	0.0645072	-0.21983	-0.359462	-0.158179	-0.287547	0.0521475	-0.366009	0.0265506	0.110215	0.0401487	-0.287247	-0.266972	-0.184337	-0.215798	-0.487034	-0.335311	0.0769465	-0.0175492	-0.324758	-0.144646	-0.287033	-0.310113	-0.408684	-0.573523	0.180512	0.357514	0.0865457	0.650661	0.315028	0.569468	0.0865459	0.686833	0.238027	0.580258	0.24015	0.665316	0.596842	0.7751	0.622968	0.721435	-0.520263	-0.550897	-0.408788	-0.65104	0.381416	0.501521	0.172105
		77G7	-0.199738	-0.447619	-0.482722	-0.219764	-0.523161	-0.174506	-0.478708	-0.0692381	-0.156594	-0.184454	-0.428568	-0.335928	-0.431183	-0.458494	-0.635715	-0.403458	-0.167402	-0.245233	-0.463899	-0.356962	-0.51339	-0.447649	-0.554886	-0.582001	-0.0916979	0.183145	-0.0626542	0.59254	0.0553304	0.387263	-0.062654	0.630791	0.127332	0.650966	0.15304	0.662863	0.531812	0.746275	0.577632	0.699704	-0.593012	-0.587124	-0.538096	-0.662018	0.181088	0.490518	0.115454
		TauAB	-0.304094	-0.489879	-0.492529	-0.124047	-0.660371	-0.267509	-0.507917	0.143741	-0.245831	-0.310047	-0.45981	-0.30295	-0.533037	-0.567159	-0.631051	-0.318518	-0.248492	-0.332299	-0.448837	-0.377718	-0.579989	-0.576553	-0.571879	-0.553024	-0.116819	0.175081	-0.085834	0.68918	0.0530142	0.430749	-0.0858339	0.71948	0.159009	0.775545	0.0497925	0.732483	0.588558	0.820753	0.58756	0.781199	-0.60113	-0.580606	-0.534323	-0.63848	0.399649	0.700102	0.349578
	354-369	HT7	-0.0282551	-0.316143	-0.459145	-0.27635	-0.331328	-0.00636967	-0.476222	-0.0260246	0.0230059	-0.0425326	-0.377957	-0.363236	-0.267613	-0.287948	-0.58542	-0.463033	0.0358354	-0.052413	-0.391021	-0.260872	-0.381221	-0.387657	-0.503842	-0.663	0.0699351	0.239995	-0.0280186	0.559063	0.184777	0.455792	-0.0280184	0.605865	0.12813	0.557438	0.150382	0.58113	0.507127	0.704565	0.535434	0.650131	-0.608097	-0.635189	-0.495891	-0.733003	0.361674	0.476554	0.206872
		77G7	-0.154105	-0.423824	-0.527017	-0.368658	-0.38995	-0.0583346	-0.513878	-0.154793	-0.125096	-0.140678	-0.459336	-0.411787	-0.363935	-0.362976	-0.666441	-0.541726	-0.0220788	-0.0869473	-0.40225	-0.367458	-0.485476	-0.373974	-0.571907	-0.658874	-0.111741	0.0776067	-0.117706	0.429951	-0.0230076	0.271074	-0.117706	0.495339	0.0380808	0.542153	0.14473	0.50066	0.418816	0.580579	0.486122	0.559457	-0.641766	-0.64474	-0.573959	-0.71171	0.0947839	0.375291	0.122418
		TauAB	-0.236335	-0.493359	-0.559167	-0.339608	-0.503154	-0.160266	-0.563495	-0.0927304	-0.193435	-0.224473	-0.496197	-0.422603	-0.461445	-0.46907	-0.698826	-0.520898	-0.114879	-0.186102	-0.46038	-0.409676	-0.558019	-0.489021	-0.613937	-0.667314	-0.156449	0.0619175	-0.161896	0.482284	-0.0431813	0.283253	-0.161896	0.540219	0.0244455	0.602748	0.0598828	0.543577	0.431433	0.639051	0.477412	0.603895	-0.668482	-0.664281	-0.59843	-0.733373	0.216541	0.471718	0.203358
	407-438	HT7	0.32666	0.613114	0.78592	0.805572	0.183001	0.294514	0.791651	0.679987	0.392233	0.416561	0.72257	0.850991	0.343206	0.390884	0.806608	0.815007	0.286234	0.357364	0.88181	0.704623	0.584356	0.484625	0.789952	0.845383	0.433286	0.29671	0.626902	0.13476	0.309838	0.180847	0.626902	0.0821172	0.610954	0.131416	0.36275	0.0867076	0.261529	-0.0900294	0.218402	-0.0146742	0.780255	0.824072	0.798267	0.859382	0.0396313	0.23743	0.392186
		77G7	0.17879	0.506332	0.763075	0.83489	0.0413632	0.111025	0.748256	0.654182	0.274868	0.315461	0.703411	0.86323	0.211533	0.248	0.770743	0.81965	0.0679428	0.146501	0.75446	0.579171	0.486922	0.376637	0.742572	0.877068	0.317189	0.262609	0.572613	0.130504	0.20847	0.110296	0.572612	0.0531003	0.570229	0.141754	0.298894	0.105304	0.231082	-0.0639367	0.174215	-0.023128	0.791487	0.852121	0.785616	0.875718	-0.00798769	0.227362	0.332765
		TauAB	0.0583359	0.385042	0.714095	0.773725	-0.0172412	-0.00291275	0.710246	0.488396	0.136186	0.213437	0.644441	0.808686	0.105265	0.147376	0.730352	0.806973	-0.0361658	0.0547438	0.668728	0.521598	0.398101	0.314577	0.694336	0.908254	0.144434	0.0929176	0.43458	-0.00481587	0.0454911	-0.0659361	0.434579	-0.0761011	0.417201	0.0209433	0.156233	-0.0111647	0.0674253	-0.190971	0.0253726	-0.153698	0.787586	0.865997	0.739117	0.902359	-0.0930638	0.0990891	0.197598
			Tau12	HT7	77G7	TauAB	Tau12	HT7	77G7	TauAB	Tau12	HT7	77G7	TauAB	Tau12	HT7	77G7	TauAB	Tau12	HT7	77G7	TauAB	Tau12	HT7	77G7	TauAB	Tau12	HT7	77G7	TauAB	Tau12	HT7	77G7	TauAB	Tau12	HT7	77G7	TauAB	Tau12	HT7	77G7	TauAB	Tau12	HT7	77G7	TauAB	HT7	77G7	TauAB
			6-23				25-44				45-68 0N				68-97 1N				68-87 2N				212-221				243-254				275-286 3R				299-317 4R				354-369				407-438				6-23
			TBS																																												SI
[truncated: 33 more columns]

## Sheet: c) PSP
c)
			TBS																																												SI
			6-23				25-44				45-68 0N				68-97 1N				68-87 2N				212-221				243-254				275-286 3R				299-317 4R				354-369				407-438				6-23
		PSP	Tau12	HT7	77G7	TauAB	Tau12	HT7	77G7	TauAB	Tau12	HT7	77G7	TauAB	Tau12	HT7	77G7	TauAB	Tau12	HT7	77G7	TauAB	Tau12	HT7	77G7	TauAB	Tau12	HT7	77G7	TauAB	Tau12	HT7	77G7	TauAB	Tau12	HT7	77G7	TauAB	Tau12	HT7	77G7	TauAB	Tau12	HT7	77G7	TauAB	HT7	77G7	TauAB
TBS	6-23	Tau12	1	0.875275	0.464931	0.401797	0.952388	0.869517	0.575908	0.307358	0.899681	0.817023	0.517265	0.389806	0.960259	0.875858	0.456829	0.309439	0.811244	0.799841	0.372202	0.355283	0.927637	0.925206	0.534428	0.351125	0.78338	0.836797	0.567667	0.368856	0.686829	0.593442	0.567667	0.344233	0.658512	0.656019	0.804011	0.325034	0.426853	0.373792	0.699322	0.408707	0.410501	0.360937	0.407313	0.370175	0.37609	0.231688	0.19833
		HT7	0.875275	1	0.747587	0.682194	0.795865	0.774126	0.768329	0.658105	0.923428	0.934129	0.807783	0.655668	0.880612	0.891124	0.74869	0.611979	0.644838	0.790627	0.595373	0.650388	0.938192	0.818127	0.788188	0.656344	0.88016	0.966232	0.790466	0.668677	0.857884	0.810761	0.790466	0.644437	0.85358	0.83925	0.915607	0.593339	0.701323	0.69973	0.868609	0.679878	0.684894	0.675629	0.706925	0.662937	0.563672	0.510255	0.40078
		77G7	0.464931	0.747587	1	0.984529	0.317188	0.266385	0.922536	0.911127	0.689462	0.614058	0.949835	0.963633	0.455257	0.424564	0.994828	0.961114	0.171988	0.436852	0.839455	0.897727	0.71211	0.31401	0.989731	0.982145	0.85957	0.827539	0.978938	0.985039	0.833174	0.930995	0.978938	0.980764	0.957733	0.714371	0.855861	0.943696	0.975308	0.963738	0.918387	0.952812	0.970198	0.954361	0.973597	0.937341	0.65465	0.790439	0.614824
		TauAB	0.401797	0.682194	0.984529	1	0.262063	0.180868	0.889881	0.911087	0.653051	0.56083	0.936918	0.982517	0.395147	0.349001	0.98386	0.978657	0.0525365	0.304056	0.784322	0.879234	0.655895	0.210247	0.970014	0.995096	0.823414	0.780537	0.955968	0.997038	0.781029	0.884754	0.955968	0.991464	0.934383	0.687746	0.800356	0.971519	0.986568	0.968121	0.871083	0.95322	0.988791	0.966278	0.979364	0.931918	0.675462	0.82123	0.643331
	25-44	Tau12	0.952388	0.795865	0.317188	0.262063	1	0.867046	0.474603	0.23463	0.778015	0.723712	0.362629	0.237706	0.952984	0.85327	0.312019	0.169041	0.810933	0.734483	0.252879	0.225413	0.84572	0.929535	0.374132	0.211001	0.677303	0.701343	0.401456	0.225984	0.566713	0.418414	0.401456	0.206521	0.518253	0.552451	0.675982	0.179458	0.275721	0.218804	0.531341	0.278573	0.268486	0.204113	0.247004	0.23956	0.150338	0.0236146	0.0164513
		HT7	0.869517	0.774126	0.266385	0.180868	0.867046	1	0.422434	0.296321	0.73683	0.783841	0.349345	0.190663	0.883578	0.954827	0.281658	0.094803	0.845451	0.849196	0.267329	0.241177	0.712068	0.9281	0.331223	0.150989	0.534327	0.676077	0.358615	0.157582	0.420187	0.345151	0.358615	0.143166	0.408001	0.522527	0.683539	0.104031	0.19812	0.177058	0.495038	0.16614	0.222169	0.1854	0.24517	0.110209	0.131178	-0.0451023	-0.060566
		77G7	0.575908	0.768329	0.922536	0.889881	0.474603	0.422434	1	0.733812	0.73072	0.631749	0.863628	0.907752	0.528681	0.511181	0.899208	0.865547	0.268191	0.501138	0.761328	0.732493	0.76384	0.459082	0.932894	0.894108	0.886176	0.82017	0.948245	0.877231	0.734829	0.88304	0.948245	0.90907	0.906505	0.565093	0.917468	0.855908	0.84585	0.795021	0.896996	0.903535	0.869419	0.797469	0.859389	0.887219	0.428286	0.543208	0.320231
		TauAB	0.307358	0.658105	0.911127	0.911087	0.23463	0.296321	0.733812	1	0.564929	0.6127	0.884256	0.85172	0.423038	0.493743	0.940299	0.909984	0.113843	0.354931	0.846963	0.942363	0.518221	0.222935	0.873006	0.919621	0.631761	0.672162	0.827367	0.92197	0.672166	0.732389	0.827367	0.896805	0.792542	0.775766	0.684946	0.845391	0.914905	0.946699	0.745079	0.799126	0.925383	0.955809	0.941491	0.777974	0.592685	0.77051	0.584345
	45-68 0N	Tau12	0.899681	0.923428	0.689462	0.653051	0.778015	0.73683	0.73072	0.564929	1	0.917589	0.785291	0.652503	0.859126	0.822076	0.691305	0.606639	0.584878	0.693491	0.5325	0.564134	0.934739	0.743994	0.761599	0.620653	0.868028	0.94857	0.788951	0.621416	0.766185	0.762793	0.788951	0.601058	0.817068	0.796878	0.903057	0.55719	0.674179	0.629248	0.849307	0.606234	0.678736	0.649377	0.680585	0.590613	0.646358	0.547713	0.357816
		HT7	0.817023	0.934129	0.614058	0.56083	0.723712	0.783841	0.631749	0.6127	0.917589	1	0.773898	0.568317	0.804046	0.91625	0.630613	0.496298	0.560696	0.695523	0.430221	0.535367	0.813707	0.764041	0.677492	0.542977	0.721191	0.906391	0.682887	0.539838	0.686267	0.707125	0.682887	0.515848	0.70396	0.765688	0.836941	0.465317	0.577575	0.599421	0.763696	0.528243	0.59097	0.607163	0.633267	0.518789	0.63677	0.509588	0.355579
		77G7	0.517265	0.807783	0.949835	0.936918	0.362629	0.349345	0.863628	0.884256	0.785291	0.773898	1	0.927889	0.503539	0.544381	0.958697	0.915351	0.188262	0.444081	0.750798	0.851561	0.721121	0.372238	0.966144	0.938534	0.813113	0.872486	0.951847	0.927896	0.795396	0.91755	0.951847	0.917915	0.915536	0.773054	0.867664	0.869878	0.929979	0.943452	0.915919	0.880195	0.942668	0.954457	0.967489	0.878614	0.775802	0.843677	0.608766
		TauAB	0.389806	0.655668	0.963633	0.982517	0.237706	0.190663	0.907752	0.85172	0.652503	0.568317	0.927889	1	0.345578	0.346823	0.957148	0.954739	-0.00504932	0.256513	0.715909	0.816169	0.618951	0.193224	0.95832	0.983535	0.797393	0.770288	0.953834	0.976313	0.706838	0.883755	0.953834	0.986009	0.904064	0.592963	0.813039	0.977398	0.95186	0.929689	0.862569	0.954469	0.970084	0.934105	0.966035	0.929322	0.66695	0.791656	0.601222
	68-97 1N	Tau12	0.960259	0.880612	0.455257	0.395147	0.952984	0.883578	0.528681	0.423038	0.859126	0.804046	0.503539	0.345578	1	0.897581	0.465803	0.319845	0.844213	0.834139	0.439551	0.434811	0.906571	0.910033	0.50486	0.341882	0.758964	0.810805	0.525616	0.369014	0.700216	0.513021	0.525616	0.327192	0.638562	0.753091	0.751766	0.282805	0.440257	0.392983	0.637799	0.354739	0.422943	0.387834	0.406509	0.313704	0.31721	0.205515	0.176829
		HT7	0.875858	0.891124	0.424564	0.349001	0.85327	0.954827	0.511181	0.493743	0.822076	0.91625	0.544381	0.346823	0.897581	1	0.444789	0.258265	0.767228	0.822975	0.336028	0.386934	0.778804	0.912999	0.484366	0.322918	0.621595	0.797684	0.491545	0.328606	0.566224	0.50616	0.491545	0.304393	0.548045	0.673067	0.762407	0.263235	0.366985	0.379811	0.62132	0.332798	0.382168	0.37578	0.420968	0.292202	0.344363	0.187005	0.139579
		77G7	0.456829	0.74869	0.994828	0.98386	0.312019	0.281658	0.899208	0.940299	0.691305	0.630613	0.958697	0.957148	0.465803	0.444789	1	0.961296	0.180327	0.442069	0.85237	0.924975	0.696294	0.309175	0.983495	0.980795	0.836318	0.823788	0.967931	0.983709	0.818011	0.90586	0.967931	0.97267	0.943934	0.746108	0.848237	0.933442	0.979638	0.974492	0.905648	0.926809	0.981258	0.974284	0.986465	0.905929	0.672049	0.804153	0.626173
		TauAB	0.309439	0.611979	0.961114	0.978657	0.169041	0.094803	0.865547	0.909984	0.606639	0.496298	0.915351	0.954739	0.319845	0.258265	0.961296	1	-0.0172046	0.254167	0.813204	0.870447	0.599433	0.109988	0.945516	0.982702	0.784404	0.718959	0.936313	0.977427	0.736503	0.832772	0.936313	0.977072	0.893674	0.671668	0.738788	0.926361	0.969222	0.938835	0.818988	0.908072	0.977181	0.956647	0.956376	0.907733	0.635319	0.809785	0.560245
	68-87 2N	Tau12	0.811244	0.644838	0.171988	0.0525365	0.810933	0.845451	0.268191	0.113843	0.584878	0.560696	0.188262	-0.00504932	0.844213	0.767228	0.180327	-0.0172046	1	0.926385	0.371002	0.23002	0.677829	0.909682	0.222931	0.0118028	0.465382	0.528126	0.24403	0.0351996	0.469482	0.281654	0.24403	-0.00162277	0.331791	0.500993	0.540735	-0.0564854	0.102593	0.0816548	0.423933	0.0309151	0.0780982	0.071429	0.0993851	-0.00684274	0.036711	-0.0974739	-0.0454353
		HT7	0.799841	0.790627	0.436852	0.304056	0.734483	0.849196	0.501138	0.354931	0.693491	0.695523	0.444081	0.256513	0.834139	0.822975	0.442069	0.254167	0.926385	1	0.590582	0.473141	0.765711	0.879933	0.477196	0.279462	0.631802	0.709516	0.496304	0.301069	0.642623	0.517008	0.496304	0.272098	0.54749	0.647455	0.72047	0.190473	0.352557	0.34387	0.629076	0.282416	0.328319	0.331578	0.362304	0.256395	0.204005	0.120039	0.0963169
		77G7	0.372202	0.595373	0.839455	0.784322	0.252879	0.267329	0.761328	0.846963	0.5325	0.430221	0.750798	0.715909	0.439551	0.336028	0.85237	0.813204	0.371002	0.590582	1	0.91462	0.596852	0.297455	0.813349	0.781204	0.714943	0.643476	0.81458	0.791146	0.718953	0.713586	0.81458	0.772074	0.774542	0.665837	0.712525	0.668942	0.811628	0.779581	0.740872	0.665469	0.811007	0.812282	0.79544	0.652806	0.40057	0.574212	0.390194
		TauAB	0.355283	0.650388	0.897727	0.879234	0.225413	0.241177	0.732493	0.942363	0.564134	0.535367	0.851561	0.816169	0.434811	0.386934	0.924975	0.870447	0.23002	0.473141	0.91462	1	0.579328	0.232888	0.855768	0.864096	0.723662	0.720485	0.840206	0.892907	0.776011	0.765001	0.840206	0.849369	0.82992	0.754942	0.705392	0.788562	0.919812	0.922207	0.74837	0.752007	0.909716	0.93746	0.898998	0.722276	0.613869	0.761874	0.655478
	212-221	Tau12	0.927637	0.938192	0.71211	0.655895	0.84572	0.712068	0.76384	0.518221	0.934739	0.813707	0.721121	0.618951	0.906571	0.778804	0.696294	0.599433	0.677829	0.765711	0.596852	0.579328	1	0.803383	0.760264	0.615099	0.942313	0.934019	0.783074	0.633556	0.879275	0.787176	0.783074	0.611209	0.867496	0.799475	0.891177	0.566323	0.681955	0.625651	0.858233	0.658344	0.648977	0.604337	0.635177	0.643973	0.504933	0.462121	0.350204
		HT7	0.925206	0.818127	0.31401	0.210247	0.929535	0.9281	0.459082	0.222935	0.743994	0.764041	0.372238	0.193224	0.910033	0.912999	0.309175	0.109988	0.909682	0.879933	0.297455	0.232888	0.803383	1	0.379905	0.177674	0.605548	0.699181	0.396228	0.184468	0.554827	0.461656	0.396228	0.170276	0.481652	0.539396	0.707709	0.13472	0.220825	0.211865	0.579868	0.252324	0.210663	0.182767	0.244831	0.219526	0.160506	0.00836763	0.0139167
		77G7	0.534428	0.788188	0.989731	0.970014	0.374132	0.331223	0.932894	0.873006	0.761599	0.677492	0.966144	0.95832	0.50486	0.484366	0.983495	0.945516	0.222931	0.477196	0.813349	0.855768	0.760264	0.379905	1	0.968873	0.875997	0.865237	0.992838	0.962884	0.830906	0.947045	0.992838	0.962762	0.964395	0.735352	0.899976	0.925698	0.956247	0.942512	0.957515	0.940847	0.957712	0.939322	0.970493	0.928617	0.68876	0.789952	0.582455
		TauAB	0.351125	0.656344	0.982145	0.995096	0.211001	0.150989	0.894108	0.919621	0.620653	0.542977	0.938534	0.983535	0.341882	0.322918	0.980795	0.982702	0.0118028	0.279462	0.781204	0.864096	0.615099	0.177674	0.968873	1	0.788563	0.750371	0.951249	0.992839	0.743755	0.877116	0.951249	0.996002	0.911771	0.655874	0.787698	0.96977	0.971493	0.960686	0.863475	0.953943	0.98148	0.961417	0.980658	0.93947	0.654213	0.810383	0.605228
	243-254	Tau12	0.78338	0.88016	0.85957	0.823414	0.677303	0.534327	0.886176	0.631761	0.868028	0.721191	0.813113	0.797393	0.758964	0.621595	0.836318	0.784404	0.465382	0.631802	0.714943	0.723662	0.942313	0.605548	0.875997	0.788563	1	0.933277	0.903314	0.812544	0.916455	0.877763	0.903314	0.799321	0.959829	0.756427	0.902474	0.753773	0.842089	0.771111	0.891674	0.823235	0.809996	0.751948	0.773498	0.808274	0.539734	0.583722	0.45525
		HT7	0.836797	0.966232	0.827539	0.780537	0.701343	0.676077	0.82017	0.672162	0.94857	0.906391	0.872486	0.770288	0.810805	0.797684	0.823788	0.718959	0.528126	0.709516	0.643476	0.720485	0.934019	0.699181	0.865237	0.750371	0.933277	1	0.880561	0.768821	0.888774	0.884525	0.880561	0.743442	0.922404	0.833752	0.940572	0.705789	0.80618	0.784783	0.915929	0.763117	0.786963	0.77088	0.795329	0.742901	0.687137	0.645501	0.522692
		77G7	0.567667	0.790466	0.978938	0.955968	0.401456	0.358615	0.948245	0.827367	0.788951	0.682887	0.951847	0.953834	0.525616	0.491545	0.967931	0.936313	0.24403	0.496304	0.81458	0.840206	0.783074	0.396228	0.992838	0.951249	0.903314	0.880561	1	0.94738	0.828461	0.947705	1	0.950224	0.966544	0.711902	0.915775	0.906967	0.945499	0.913199	0.953917	0.925832	0.948408	0.917903	0.949676	0.913923	0.670583	0.762664	0.546532
		TauAB	0.368856	0.668677	0.985039	0.997038	0.225984	0.157582	0.877231	0.92197	0.621416	0.539838	0.927896	0.976313	0.369014	0.328606	0.983709	0.977427	0.0351996	0.301069	0.791146	0.892907	0.633556	0.184468	0.962884	0.992839	0.812544	0.768821	0.94738	1	0.788035	0.882121	0.94738	0.991999	0.929364	0.684325	0.779126	0.971143	0.988799	0.975468	0.856414	0.954375	0.98394	0.967187	0.975405	0.934463	0.669696	0.82384	0.663091
	275-286 3R	Tau12	0.686829	0.857884	0.833174	0.781029	0.566713	0.420187	0.734829	0.672166	0.766185	0.686267	0.795396	0.706838	0.700216	0.566224	0.818011	0.736503	0.469482	0.642623	0.718953	0.776011	0.879275	0.554827	0.830906	0.743755	0.916455	0.888774	0.828461	0.788035	1	0.877353	0.828461	0.742545	0.92911	0.848639	0.785033	0.700998	0.833854	0.82103	0.853653	0.784399	0.755752	0.764548	0.749243	0.787017	0.644279	0.692338	0.648069
		HT7	0.593442	0.810761	0.930995	0.884754	0.418414	0.345151	0.88304	0.732389	0.762793	0.707125	0.91755	0.883755	0.513021	0.50616	0.90586	0.832772	0.281654	0.517008	0.713586	0.765001	0.787176	0.461656	0.947045	0.877116	0.877763	0.884525	0.947705	0.882121	0.877353	1	0.947705	0.879549	0.944059	0.668212	0.885883	0.855938	0.877569	0.880626	0.954395	0.919707	0.848148	0.84403	0.877502	0.921576	0.72062	0.775363	0.639483
		77G7	0.567667	0.790466	0.978938	0.955968	0.401456	0.358615	0.948245	0.827367	0.788951	0.682887	0.951847	0.953834	0.525616	0.491545	0.967931	0.936313	0.24403	0.496304	0.81458	0.840206	0.783074	0.396228	0.992838	0.951249	0.903314	0.880561	1	0.94738	0.828461	0.947705	1	0.950224	0.966544	0.711902	0.915775	0.906967	0.945499	0.913199	0.953917	0.925832	0.948408	0.917903	0.949676	0.913923	0.670583	0.762664	0.546532
		TauAB	0.344233	0.644437	0.980764	0.991464	0.206521	0.143166	0.90907	0.896805	0.601058	0.515848	0.917915	0.986009	0.327192	0.304393	0.97267	0.977072	-0.00162277	0.272098	0.772074	0.849369	0.611209	0.170276	0.962762	0.996002	0.799321	0.743442	0.950224	0.991999	0.742545	0.879549	0.950224	1	0.913114	0.618222	0.784516	0.976588	0.965263	0.947109	0.854697	0.967347	0.971422	0.941259	0.965029	0.951609	0.616149	0.779723	0.589852
	299-317 4R	Tau12	0.658512	0.85358	0.957733	0.934383	0.518253	0.408001	0.906505	0.792542	0.817068	0.70396	0.915536	0.904064	0.638562	0.548045	0.943934	0.893674	0.331791	0.54749	0.774542	0.82992	0.867496	0.481652	0.964395	0.911771	0.959829	0.922404	0.966544	0.929364	0.92911	0.944059	0.966544	0.913114	1	0.795969	0.901003	0.883532	0.944792	0.911599	0.947635	0.92311	0.91546	0.88657	0.905872	0.907006	0.67144	0.748671	0.612367
		HT7	0.656019	0.83925	0.714371	0.687746	0.552451	0.522527	0.565093	0.775766	0.796878	0.765688	0.773054	0.592963	0.753091	0.673067	0.746108	0.671668	0.500993	0.647455	0.665837	0.754942	0.799475	0.539396	0.735352	0.655874	0.756427	0.833752	0.711902	0.684325	0.848639	0.668212	0.711902	0.618222	0.795969	1	0.708388	0.560845	0.757685	0.765671	0.754999	0.578654	0.719741	0.760451	0.727585	0.570815	0.682732	0.675009	0.552804
		77G7	0.804011	0.915607	0.855861	0.800356	0.675982	0.683539	0.917468	0.684946	0.903057	0.836941	0.867664	0.813039	0.751766	0.762407	0.848237	0.738788	0.540735	0.72047	0.712525	0.705392	0.891177	0.707709	0.899976	0.787698	0.902474	0.940572	0.915775	0.779126	0.785033	0.885883	0.915775	0.784516	0.901003	0.708388	1	0.745133	0.783926	0.753449	0.953438	0.79094	0.801427	0.756961	0.821058	0.757316	0.554518	0.548381	0.37615
		TauAB	0.325034	0.593339	0.943696	0.971519	0.179458	0.104031	0.855908	0.845391	0.55719	0.465317	0.869878	0.977398	0.282805	0.263235	0.933442	0.926361	-0.0564854	0.190473	0.668942	0.788562	0.566323	0.13472	0.925698	0.96977	0.753773	0.705789	0.906967	0.971143	0.700998	0.855938	0.906967	0.976588	0.883532	0.560845	0.745133	1	0.93924	0.928568	0.830471	0.970174	0.93919	0.90511	0.940255	0.93538	0.643391	0.784591	0.667785
	354-369	Tau12	0.426853	0.701323	0.975308	0.986568	0.275721	0.19812	0.84585	0.914905	0.674179	0.577575	0.929979	0.95186	0.440257	0.366985	0.979638	0.969222	0.102593	0.352557	0.811628	0.919812	0.681955	0.220825	0.956247	0.971493	0.842089	0.80618	0.945499	0.988799	0.833854	0.877569	0.945499	0.965263	0.944792	0.757685	0.783926	0.93924	1	0.979518	0.85936	0.918092	0.985775	0.977075	0.968975	0.897231	0.719079	0.852898	0.701591
		HT7	0.373792	0.69973	0.963738	0.968121	0.218804	0.177058	0.795021	0.946699	0.629248	0.599421	0.943452	0.929689	0.392983	0.379811	0.974492	0.938835	0.0816548	0.34387	0.779581	0.922207	0.625651	0.211865	0.942512	0.960686	0.771111	0.784783	0.913199	0.975468	0.82103	0.880626	0.913199	0.947109	0.911599	0.765671	0.753449	0.928568	0.979518	1	0.8518	0.909841	0.961798	0.983809	0.974565	0.892837	0.766164	0.890185	0.762469
		77G7	0.699322	0.868609	0.918387	0.871083	0.531341	0.495038	0.896996	0.745079	0.849307	0.763696	0.915919	0.862569	0.637799	0.62132	0.905648	0.818988	0.423933	0.629076	0.740872	0.74837	0.858233	0.579868	0.957515	0.863475	0.891674	0.915929	0.953917	0.856414	0.853653	0.954395	0.953917	0.854697	0.947635	0.754999	0.953438	0.830471	0.85936	0.8518	1	0.875276	0.850083	0.832725	0.886394	0.859732	0.685374	0.710622	0.538868
		TauAB	0.408707	0.679878	0.952812	0.95322	0.278573	0.16614	0.903535	0.799126	0.606234	0.528243	0.880195	0.954469	0.354739	0.332798	0.926809	0.908072	0.0309151	0.282416	0.665469	0.752007	0.658344	0.252324	0.940847	0.953943	0.823235	0.763117	0.925832	0.954375	0.784399	0.919707	0.925832	0.967347	0.92311	0.578654	0.79094	0.970174	0.918092	0.909841	0.875276	1	0.901315	0.865334	0.907482	0.987837	0.605772	0.742123	0.613904
	407-438	Tau12	0.410501	0.684894	0.970198	0.988791	0.268486	0.222169	0.869419	0.925383	0.678736	0.59097	0.942668	0.970084	0.422943	0.382168	0.981258	0.977181	0.0780982	0.328319	0.811007	0.909716	0.648977	0.210663	0.957712	0.98148	0.809996	0.786963	0.948408	0.98394	0.755752	0.848148	0.948408	0.971422	0.91546	0.719741	0.801427	0.93919	0.985775	0.961798	0.850083	0.901315	1	0.981981	0.984275	0.874919	0.687676	0.822408	0.62396
		HT7	0.360937	0.675629	0.954361	0.966278	0.204113	0.1854	0.797469	0.955809	0.649377	0.607163	0.954457	0.934105	0.387834	0.37578	0.974284	0.956647	0.071429	0.331578	0.812282	0.93746	0.604337	0.182767	0.939322	0.961417	0.751948	0.77088	0.917903	0.967187	0.764548	0.84403	0.917903	0.941259	0.88657	0.760451	0.756961	0.90511	0.977075	0.983809	0.832725	0.865334	0.981981	1	0.985282	0.848055	0.762077	0.886968	0.700522
		77G7	0.407313	0.706925	0.973597	0.979364	0.247004	0.24517	0.859389	0.941491	0.680585	0.633267	0.967489	0.966035	0.406509	0.420968	0.986465	0.956376	0.0993851	0.362304	0.79544	0.898998	0.635177	0.244831	0.970493	0.980658	0.773498	0.795329	0.949676	0.975405	0.749243	0.877502	0.949676	0.965029	0.905872	0.727585	0.821058	0.940255	0.968975	0.974565	0.886394	0.907482	0.984275	0.985282	1	0.883103	0.73387	0.847133	0.651883
		TauAB	0.370175	0.662937	0.937341	0.931918	0.23956	0.110209	0.887219	0.777974	0.590613	0.518789	0.878614	0.929322	0.313704	0.292202	0.905929	0.907733	-0.00684274	0.256395	0.652806	0.722276	0.643973	0.219526	0.928617	0.93947	0.808274	0.742901	0.913923	0.934463	0.787017	0.921576	0.913923	0.951609	0.907006	0.570815	0.757316	0.93538	0.897231	0.892837	0.859732	0.987837	0.874919	0.848055	0.883103	1	0.607923	0.752257	0.582176
SI	6-23	HT7	0.37609	0.563672	0.65465	0.675462	0.150338	0.131178	0.428286	0.592685	0.646358	0.63677	0.775802	0.66695	0.31721	0.344363	0.672049	0.635319	0.036711	0.204005	0.40057	0.613869	0.504933	0.160506	0.68876	0.654213	0.539734	0.687137	0.670583	0.669696	0.644279	0.72062	0.670583	0.616149	0.67144	0.682732	0.554518	0.643391	0.719079	0.766164	0.685374	0.605772	0.687676	0.762077	0.73387	0.607923	1	0.939844	0.842952
		77G7	0.231688	0.510255	0.790439	0.82123	0.0236146	-0.0451023	0.543208	0.77051	0.547713	0.509588	0.843677	0.791656	0.205515	0.187005	0.804153	0.809785	-0.0974739	0.120039	0.574212	0.761874	0.462121	0.00836763	0.789952	0.810383	0.583722	0.645501	0.762664	0.82384	0.692338	0.775363	0.762664	0.779723	0.748671	0.675009	0.548381	0.784591	0.852898	0.890185	0.710622	0.742123	0.822408	0.886968	0.847133	0.752257	0.939844	1	0.863739
		TauAB	0.19833	0.40078	0.614824	0.643331	0.0164513	-0.060566	0.320231	0.584345	0.357816	0.355579	0.608766	0.601222	0.176829	0.139579	0.626173	0.560245	-0.0454353	0.0963169	0.390194	0.655478	0.350204	0.0139167	0.582455	0.605228	0.45525	0.522692	0.546532	0.663091	0.648069	0.639483	0.546532	0.589852	0.612367	0.552804	0.37615	0.667785	0.701591	0.762469	0.538868	0.613904	0.62396	0.700522	0.651883	0.582176	0.842952	0.863739	1
	25-44	HT7	0.368825	0.371819	0.260527	0.247379	0.118845	0.241169	0.147891	0.164433	0.574893	0.527381	0.429053	0.280179	0.255963	0.323912	0.267881	0.245751	0.158096	0.257563	0.104017	0.172026	0.370223	0.208432	0.357703	0.238763	0.285054	0.480501	0.372203	0.231671	0.322417	0.410614	0.372203	0.201632	0.335673	0.461364	0.377453	0.21972	0.293203	0.314622	0.465339	0.198339	0.276847	0.337015	0.345793	0.218787	0.770502	0.572155	0.426016
		77G7	0.173632	0.506061	0.748103	0.766784	-0.00498007	-0.00713468	0.455366	0.820206	0.469306	0.503766	0.801157	0.708688	0.220201	0.229784	0.780857	0.757915	-0.0437431	0.18638	0.616624	0.8348	0.397787	0.00670056	0.722183	0.75361	0.515024	0.607887	0.683359	0.78384	0.686216	0.688501	0.683359	0.718812	0.688669	0.730327	0.477461	0.704228	0.824552	0.885751	0.62074	0.652749	0.787493	0.880976	0.81287	0.655478	0.878293	0.951583	0.870635
		TauAB	0.0730053	0.349365	0.639205	0.674788	-0.0814778	-0.161031	0.324285	0.675853	0.256802	0.271975	0.607462	0.615131	0.091022	0.05675	0.653751	0.610889	-0.141814	0.0284482	0.428443	0.691951	0.277842	-0.0864296	0.587255	0.648039	0.414622	0.454965	0.535158	0.702108	0.630245	0.605339	0.535158	0.633506	0.600298	0.551633	0.31757	0.699343	0.725408	0.796643	0.501929	0.643963	0.64895	0.7292	0.674495	0.619751	0.772832	0.854883	0.973479
	45-68 0N	HT7	0.386653	0.585748	0.675809	0.676883	0.142694	0.24567	0.455219	0.66913	0.667743	0.663596	0.789291	0.665891	0.362725	0.417856	0.70878	0.653607	0.148331	0.349109	0.537212	0.706835	0.502741	0.200871	0.70936	0.660344	0.535403	0.706182	0.697337	0.675241	0.619741	0.690346	0.697336	0.619018	0.666137	0.73547	0.607656	0.619604	0.732354	0.773151	0.701449	0.554476	0.720195	0.796911	0.76957	0.540625	0.951224	0.892805	0.770438
		77G7	0.25672	0.506295	0.735259	0.761367	0.0254216	0.0199044	0.509093	0.680111	0.573847	0.562457	0.820955	0.763004	0.200178	0.237809	0.749282	0.738783	-0.0921113	0.128607	0.495723	0.704908	0.436183	0.0314568	0.746593	0.749555	0.547556	0.657282	0.732649	0.763072	0.630325	0.758378	0.732649	0.721141	0.699311	0.615903	0.554144	0.734942	0.79445	0.833871	0.684969	0.685422	0.773382	0.839361	0.806658	0.689312	0.96913	0.975653	0.852223
		TauAB	0.182435	0.336171	0.517325	0.553878	-0.0111318	-0.0600552	0.232141	0.456296	0.335952	0.337218	0.53361	0.533785	0.137822	0.121266	0.529475	0.464621	-0.0797818	0.0405563	0.275662	0.562095	0.287725	-0.0188835	0.493436	0.511334	0.383063	0.476782	0.468609	0.571544	0.555591	0.566956	0.468609	0.497127	0.526257	0.471721	0.31696	0.591338	0.616377	0.672657	0.461039	0.522093	0.54373	0.619093	0.570574	0.4843	0.847035	0.822929	0.982677
	68-97 1N	HT7	0.389169	0.584956	0.619952	0.603594	0.182193	0.245703	0.433074	0.649153	0.676093	0.683195	0.781364	0.573879	0.377143	0.427623	0.655902	0.615419	0.2211	0.385601	0.554333	0.634522	0.508232	0.261024	0.676284	0.604165	0.479255	0.650927	0.655273	0.587731	0.57141	0.648744	0.655272	0.544444	0.601533	0.740074	0.590518	0.496018	0.641849	0.692602	0.691374	0.468355	0.648699	0.738568	0.712517	0.491313	0.879888	0.830719	0.583581
		77G7	0.237897	0.537181	0.82313	0.846568	0.0390015	-0.0168354	0.586086	0.831625	0.570052	0.525162	0.875753	0.80497	0.236074	0.210618	0.841777	0.855968	-0.054683	0.175445	0.65847	0.805632	0.488256	0.0308973	0.824788	0.842566	0.604555	0.656707	0.79518	0.847251	0.704429	0.77662	0.79518	0.807078	0.768967	0.725825	0.580766	0.785177	0.875992	0.908439	0.738079	0.745833	0.855928	0.919077	0.879149	0.762434	0.903722	0.986644	0.793482
		TauAB	0.16565	0.491291	0.799233	0.824654	-0.0150731	-0.0691736	0.518919	0.851627	0.453443	0.452364	0.822361	0.77107	0.181364	0.170878	0.821083	0.803418	-0.0837418	0.137176	0.62091	0.817755	0.410387	-0.00620708	0.77661	0.816496	0.538166	0.596127	0.729402	0.836164	0.696083	0.744349	0.729402	0.78497	0.730925	0.68945	0.509212	0.7926	0.857227	0.917845	0.682787	0.744451	0.820569	0.898697	0.853842	0.744173	0.87433	0.972123	0.889109
	68-87 2N	HT7	0.452648	0.534545	0.390639	0.271694	0.273038	0.465302	0.319958	0.355433	0.55168	0.56374	0.481831	0.228809	0.457248	0.49991	0.410492	0.300789	0.620167	0.753647	0.606728	0.478309	0.490126	0.493697	0.448272	0.276521	0.386937	0.528942	0.457332	0.271051	0.487078	0.479221	0.457332	0.238202	0.406658	0.586367	0.530025	0.1307	0.332359	0.365097	0.555257	0.174271	0.319981	0.401763	0.392802	0.202845	0.459847	0.385037	0.206229
		77G7	0.327379	0.61127	0.781701	0.770491	0.130318	0.161051	0.555406	0.822559	0.616974	0.637497	0.875728	0.726713	0.336736	0.374909	0.814857	0.762927	0.148607	0.359945	0.695146	0.817171	0.511021	0.2003	0.797123	0.769604	0.560731	0.6862	0.762675	0.767878	0.682791	0.763075	0.762674	0.72151	0.721945	0.761162	0.636769	0.683975	0.803421	0.864334	0.757894	0.649819	0.79752	0.885358	0.8526	0.657563	0.888802	0.924308	0.740002
		TauAB	0.18498	0.509433	0.809118	0.823493	0.0151443	-0.0387039	0.523074	0.884709	0.44427	0.43405	0.807	0.749987	0.226291	0.187622	0.833227	0.804006	-0.00558035	0.211123	0.68637	0.858409	0.437118	0.0324756	0.778648	0.812175	0.558685	0.598895	0.728796	0.838638	0.734173	0.735913	0.728796	0.781293	0.745219	0.731134	0.515733	0.779704	0.865314	0.923005	0.688287	0.735419	0.820593	0.89934	0.849884	0.730734	0.825025	0.939462	0.87607
	212-221	HT7	0.390522	0.494354	0.508819	0.495669	0.206067	0.125932	0.324138	0.46851	0.594325	0.550242	0.649417	0.449743	0.335673	0.3041	0.526288	0.48641	0.231799	0.299413	0.412486	0.456024	0.494304	0.268512	0.576136	0.489554	0.418103	0.541571	0.544902	0.470284	0.550789	0.607734	0.544902	0.428976	0.532108	0.640198	0.488065	0.415817	0.521792	0.576317	0.645228	0.419506	0.500903	0.588433	0.572653	0.454121	0.83408	0.774479	0.583304
		77G7	0.28909	0.556495	0.80998	0.832757	0.0782059	0.000604158	0.588475	0.767661	0.610042	0.548838	0.86899	0.801585	0.257252	0.225914	0.819507	0.833211	-0.044961	0.174269	0.600749	0.748826	0.527245	0.0657703	0.823412	0.825524	0.630321	0.683732	0.799454	0.83021	0.720749	0.802692	0.799454	0.793146	0.781775	0.713843	0.598193	0.783739	0.859839	0.887322	0.76074	0.757397	0.832278	0.888719	0.858218	0.777298	0.934305	0.989893	0.803659
		TauAB	0.171326	0.488862	0.810558	0.839849	-0.0182687	-0.0814339	0.545272	0.842986	0.476147	0.454397	0.837688	0.794537	0.170245	0.156835	0.82825	0.825119	-0.107548	0.115922	0.612774	0.794444	0.422597	-0.0149542	0.79733	0.83537	0.550941	0.60194	0.752853	0.846872	0.686865	0.760453	0.752853	0.803718	0.743124	0.679222	0.527611	0.811747	0.863658	0.916991	0.706905	0.764959	0.83264	0.902518	0.866543	0.76955	0.886743	0.982803	0.865528
	243-254	HT7	0.299298	0.420075	0.540916	0.55127	0.0378398	0.0699392	0.300809	0.427039	0.513291	0.477357	0.610079	0.554776	0.21467	0.224938	0.550011	0.497758	0.0317778	0.186705	0.338623	0.544513	0.392487	0.0795025	0.561915	0.518896	0.448581	0.582358	0.560493	0.558779	0.569243	0.634608	0.560492	0.496799	0.566657	0.539216	0.442093	0.554218	0.616939	0.653933	0.572975	0.496911	0.562076	0.636056	0.60387	0.480376	0.936318	0.854358	0.878816
		77G7	0.267574	0.4864	0.729785	0.753472	0.0376217	0.0425018	0.465245	0.706178	0.517545	0.483598	0.755595	0.731515	0.23955	0.228607	0.749939	0.704907	-0.00420241	0.193538	0.548249	0.767301	0.433139	0.0475958	0.719772	0.7253	0.549215	0.638271	0.701146	0.764211	0.665789	0.722196	0.701146	0.702105	0.703656	0.643033	0.531085	0.742384	0.808083	0.844444	0.663448	0.665966	0.766672	0.83231	0.792283	0.636497	0.926066	0.942192	0.93894
		TauAB	0.218882	0.34333	0.495878	0.518883	0.0387773	-0.0104921	0.2277	0.408166	0.310913	0.303995	0.472887	0.493035	0.181351	0.140738	0.502339	0.416048	-0.000757732	0.108572	0.286423	0.559398	0.309145	0.0347313	0.460335	0.467749	0.406373	0.475986	0.442266	0.542884	0.5809	0.550897	0.442266	0.464664	0.523726	0.449888	0.314276	0.562996	0.590533	0.636809	0.439159	0.504273	0.503589	0.568275	0.520711	0.454733	0.762018	0.740514	0.967013
	275-286 3R	HT7	0.404521	0.56623	0.730729	0.74717	0.193518	0.0231157	0.562057	0.553402	0.659666	0.533074	0.775084	0.724805	0.320862	0.218971	0.713727	0.738398	0.010903	0.181711	0.472291	0.590878	0.618971	0.144303	0.760865	0.725567	0.694796	0.704026	0.758863	0.73992	0.762557	0.808345	0.758863	0.707229	0.782191	0.658407	0.585626	0.712485	0.779781	0.775079	0.749292	0.731545	0.722937	0.753098	0.731922	0.764177	0.902102	0.914135	0.761666
		77G7	0.3297	0.587166	0.858707	0.878424	0.128095	0.0171887	0.64208	0.804842	0.619366	0.525069	0.871268	0.834764	0.310495	0.227231	0.862709	0.873797	0.000415672	0.221301	0.671084	0.80994	0.58589	0.0921586	0.857093	0.861487	0.711805	0.719414	0.839151	0.880579	0.797414	0.83528	0.839151	0.838908	0.845001	0.741452	0.629499	0.828899	0.914459	0.922655	0.78527	0.807761	0.873001	0.913932	0.878716	0.818483	0.894517	0.977673	0.829264
		TauAB	0.350264	0.594356	0.790687	0.802425	0.19937	0.0196906	0.538496	0.760516	0.550385	0.481742	0.780884	0.716714	0.372567	0.239735	0.796222	0.774828	0.0927598	0.260319	0.630876	0.79128	0.596062	0.15372	0.769594	0.771165	0.688549	0.680809	0.736004	0.811828	0.856162	0.778422	0.736003	0.748174	0.81081	0.779078	0.545694	0.746881	0.858327	0.884085	0.715486	0.749982	0.782907	0.840633	0.785181	0.758258	0.827748	0.916353	0.875253
	299-317 4R	HT7	-0.110473	-0.0187949	0.201197	0.240282	-0.277985	-0.103956	0.00503043	0.158748	-0.0158028	0.0421119	0.173779	0.291515	-0.161062	-0.0509363	0.218086	0.152505	-0.246337	-0.125603	0.0428116	0.316296	-0.118036	-0.239829	0.154069	0.211157	0.02908	0.141093	0.15627	0.273158	0.098739	0.19842	0.15627	0.225204	0.144474	0.0274751	0.0532036	0.342673	0.287023	0.328552	0.0878314	0.210951	0.25793	0.301568	0.275467	0.131276	0.46467	0.421416	0.681915
		77G7	-0.087819	0.00181952	0.313631	0.35054	-0.270794	-0.126107	0.0919791	0.29599	0.0137594	0.0189371	0.256182	0.378654	-0.131847	-0.0762152	0.3374	0.26394	-0.172148	-0.0626967	0.226849	0.447168	-0.06618	-0.221335	0.266239	0.322314	0.0833465	0.163983	0.257957	0.375842	0.159468	0.274549	0.257957	0.325654	0.228973	0.0966802	0.136275	0.439867	0.390564	0.428855	0.19925	0.285914	0.369625	0.41433	0.392064	0.195354	0.502627	0.503542	0.734456
		TauAB	-0.156739	-0.119255	0.0834689	0.121892	-0.304982	-0.176326	-0.125768	0.025713	-0.126874	-0.0722023	0.0435329	0.161617	-0.217217	-0.135465	0.0972614	0.0170493	-0.234198	-0.177829	-0.0571199	0.205134	-0.194798	-0.258532	0.0349346	0.0882368	-0.078568	0.0231448	0.0282457	0.153376	0.0317064	0.110837	0.0282457	0.100431	0.0381263	-0.064803	-0.0602125	0.241773	0.167904	0.221986	-0.00287287	0.11415	0.124693	0.177441	0.151007	0.0323734	0.401232	0.347186	0.676625
	354-369	HT7	-0.00386616	0.113138	0.335417	0.367193	-0.202997	-0.0791974	0.0909593	0.287578	0.122766	0.156542	0.321973	0.391399	-0.0511555	0.0146113	0.354117	0.281902	-0.160309	-0.0268915	0.180137	0.452941	0.0302871	-0.163257	0.295707	0.331951	0.164027	0.278471	0.291431	0.397055	0.278988	0.349295	0.291431	0.334251	0.295085	0.209166	0.165618	0.439155	0.428972	0.475969	0.240891	0.319555	0.383322	0.44599	0.406523	0.25157	0.63624	0.597748	0.823841
		77G7	0.135243	0.197309	0.371089	0.405649	-0.0867902	-0.0133685	0.119263	0.302285	0.268654	0.245644	0.383852	0.417548	0.0741379	0.0832157	0.391803	0.321497	-0.0538553	0.045324	0.217654	0.46813	0.162341	-0.0679604	0.356959	0.36096	0.250995	0.368889	0.355742	0.421916	0.360633	0.408413	0.355742	0.350342	0.36998	0.328724	0.24706	0.45497	0.47597	0.508942	0.338198	0.335288	0.427504	0.489828	0.450235	0.27053	0.750425	0.678478	0.861865
		TauAB	-0.007661	0.0847523	0.300375	0.335864	-0.180098	-0.152831	0.0457113	0.213106	0.0614144	0.0808927	0.257893	0.343308	-0.0638482	-0.0483453	0.307054	0.230472	-0.170161	-0.0797335	0.106878	0.387074	0.033623	-0.161371	0.252603	0.293325	0.158018	0.234428	0.238397	0.366727	0.312711	0.343786	0.238397	0.300602	0.286317	0.173939	0.105637	0.429246	0.39483	0.447665	0.214201	0.333892	0.322565	0.383502	0.34406	0.269518	0.601962	0.574611	0.8679
	407-438	HT7	0.201297	0.508427	0.792689	0.826315	0.00949951	-0.027656	0.54413	0.822402	0.529997	0.522857	0.861756	0.794832	0.194652	0.212293	0.817465	0.815987	-0.100933	0.117744	0.587928	0.775513	0.42625	0.0094315	0.793549	0.824446	0.536587	0.621193	0.75358	0.825736	0.643314	0.746307	0.75358	0.785438	0.723021	0.684291	0.551364	0.785642	0.845684	0.898397	0.707122	0.730387	0.834371	0.90505	0.871405	0.735957	0.917235	0.985833	0.823289
		77G7	0.131568	0.471205	0.769179	0.79905	-0.0522248	-0.0624783	0.488979	0.849456	0.450688	0.444529	0.807658	0.742184	0.16438	0.171072	0.797639	0.799888	-0.101806	0.130029	0.598865	0.773778	0.384703	-0.0310761	0.76018	0.801211	0.491114	0.564954	0.705351	0.808339	0.641764	0.683168	0.705351	0.762392	0.695485	0.725749	0.486147	0.762974	0.827761	0.890523	0.670195	0.704786	0.801983	0.881168	0.844836	0.710121	0.855344	0.945398	0.808249
		TauAB	0.189516	0.534845	0.828029	0.843219	0.0187743	-0.0462717	0.57323	0.870623	0.480913	0.478727	0.852429	0.785569	0.204122	0.199936	0.844131	0.831622	-0.0565133	0.174771	0.640204	0.798602	0.454779	0.0436143	0.815332	0.84554	0.566348	0.615531	0.761553	0.851572	0.719745	0.77656	0.761553	0.812844	0.760078	0.716398	0.550228	0.806763	0.860873	0.925183	0.734594	0.784157	0.827218	0.90043	0.870997	0.797565	0.843417	0.952429	0.819355
			Tau12	HT7	77G7	TauAB	Tau12	HT7	77G7	TauAB	Tau12	HT7	77G7	TauAB	Tau12	HT7	77G7	TauAB	Tau12	HT7	77G7	TauAB	Tau12	HT7	77G7	TauAB	Tau12	HT7	77G7	TauAB	Tau12	HT7	77G7	TauAB	Tau12	HT7	77G7	TauAB	Tau12	HT7	77G7	TauAB	Tau12	HT7	77G7	TauAB	HT7	77G7	TauAB
			6-23				25-44				45-68 0N				68-97 1N				68-87 2N				212-221				243-254				275-286 3R				299-317 4R				354-369				407-438				6-23
			TBS																																												SI
[truncated: 33 more columns]

## Sheet: d) CBD
d)
			TBS																																												SI
			6-23				25-44				45-68 0N				68-97 1N				68-87 2N				212-221				243-254				275-286 3R				299-317 4R				354-369				407-438				6-23
		CBD	Tau12	HT7	77G7	TauAB	Tau12	HT7	77G7	TauAB	Tau12	HT7	77G7	TauAB	Tau12	HT7	77G7	TauAB	Tau12	HT7	77G7	TauAB	Tau12	HT7	77G7	TauAB	Tau12	HT7	77G7	TauAB	Tau12	HT7	77G7	TauAB	Tau12	HT7	77G7	TauAB	Tau12	HT7	77G7	TauAB	Tau12	HT7	77G7	TauAB	HT7	77G7	TauAB
TBS	6-23	Tau12	1	0.883408	0.71391	0.525379	0.976143	0.840035	0.799713	0.445932	0.956228	0.791978	0.644457	0.444664	0.96348	0.911089	0.718018	0.409625	0.97401	0.918129	0.33951	0.684768	0.96671	0.932372	0.720292	0.444636	0.934934	0.885711	0.768356	0.581844	0.892022	0.785722	0.768356	0.409631	0.913687	0.620684	0.683338	0.304845	0.888514	0.818772	0.863558	0.556145	0.644448	0.59642	0.671026	0.586068	0.84756	0.751546	0.271097
		HT7	0.883408	1	0.928603	0.708355	0.858059	0.985679	0.930164	0.637634	0.946429	0.967988	0.902808	0.68767	0.841398	0.964964	0.897332	0.611562	0.830847	0.924428	0.422395	0.763105	0.949545	0.960971	0.925551	0.713342	0.934458	0.98869	0.933662	0.699349	0.897858	0.934536	0.933662	0.67305	0.88238	0.73583	0.829604	0.289365	0.886274	0.929821	0.952653	0.693757	0.849511	0.853489	0.893183	0.799154	0.728806	0.587025	0.0462511
		77G7	0.71391	0.928603	1	0.848102	0.682659	0.92256	0.965696	0.817592	0.854917	0.95217	0.983884	0.828381	0.707299	0.872656	0.978636	0.774303	0.67805	0.809943	0.631057	0.821912	0.852332	0.842547	0.995165	0.879608	0.885469	0.948334	0.982622	0.764274	0.871431	0.94387	0.982622	0.841673	0.856479	0.767916	0.885946	0.311543	0.874083	0.876142	0.947631	0.747739	0.954485	0.956808	0.968447	0.911273	0.683788	0.569859	0.0670484
		TauAB	0.525379	0.708355	0.848102	1	0.429488	0.744383	0.764605	0.925032	0.630457	0.705627	0.811873	0.951466	0.509774	0.625052	0.834495	0.960062	0.470211	0.581121	0.726956	0.614739	0.646964	0.605481	0.819853	0.974772	0.695216	0.75823	0.790085	0.869464	0.760937	0.850477	0.790085	0.975397	0.769817	0.6707	0.608189	0.457845	0.816098	0.760856	0.756992	0.850013	0.906304	0.90056	0.847705	0.952434	0.668186	0.681048	0.320836
	25-44	Tau12	0.976143	0.858059	0.682659	0.429488	1	0.796985	0.788408	0.402023	0.954805	0.79088	0.62859	0.350383	0.96717	0.92789	0.70724	0.326895	0.987787	0.94253	0.302922	0.728692	0.947364	0.940552	0.706321	0.359727	0.90668	0.851703	0.765254	0.510434	0.828412	0.720459	0.765255	0.321647	0.866149	0.646678	0.72968	0.283313	0.823221	0.761697	0.861969	0.473323	0.589222	0.528787	0.65475	0.502163	0.822914	0.681757	0.241354
		HT7	0.840035	0.985679	0.92256	0.744383	0.796985	1	0.893823	0.636053	0.908027	0.952766	0.907976	0.750771	0.794254	0.924251	0.87383	0.64724	0.759356	0.877059	0.397698	0.668101	0.91856	0.911987	0.907993	0.749569	0.896837	0.966841	0.910143	0.737496	0.871236	0.934396	0.910143	0.721201	0.855566	0.752347	0.7855	0.319764	0.87006	0.944837	0.924892	0.750295	0.838952	0.865846	0.884238	0.841455	0.699483	0.567756	0.0674437
		77G7	0.799713	0.930164	0.965696	0.764605	0.788408	0.893823	1	0.745728	0.910063	0.923147	0.925495	0.685294	0.823109	0.927388	0.983244	0.710872	0.797283	0.890171	0.602055	0.900783	0.912024	0.892817	0.96975	0.780235	0.929583	0.94822	0.974388	0.64508	0.929246	0.941125	0.974388	0.740576	0.892943	0.708801	0.88202	0.183618	0.885433	0.813818	0.969781	0.612749	0.935264	0.903996	0.91434	0.849004	0.71551	0.601874	0.0925489
		TauAB	0.445932	0.637634	0.817592	0.925032	0.402023	0.636053	0.745728	1	0.603853	0.695074	0.791325	0.880901	0.440285	0.597817	0.825442	0.870639	0.455239	0.544979	0.765621	0.714769	0.580966	0.584386	0.822981	0.90172	0.667345	0.713084	0.801306	0.863343	0.646145	0.726203	0.801306	0.884953	0.726954	0.722177	0.704684	0.526783	0.761582	0.66278	0.754833	0.809497	0.852592	0.800974	0.850724	0.845394	0.715958	0.650042	0.265584
	45-68 0N	Tau12	0.956228	0.946429	0.854917	0.630457	0.954805	0.908027	0.910063	0.603853	1	0.915687	0.818408	0.579814	0.953065	0.964578	0.859842	0.512834	0.940999	0.951286	0.449728	0.792116	0.993324	0.959586	0.869428	0.582007	0.980962	0.953153	0.91096	0.668629	0.915996	0.853319	0.91096	0.541958	0.946753	0.782937	0.847739	0.354723	0.925132	0.877824	0.96732	0.634702	0.759559	0.723277	0.831331	0.697668	0.854887	0.709004	0.201981
		HT7	0.791978	0.967988	0.95217	0.705627	0.79088	0.952766	0.923147	0.695074	0.915687	1	0.95762	0.731121	0.76145	0.923545	0.911968	0.587277	0.753199	0.864053	0.476732	0.781426	0.895711	0.912628	0.962023	0.729423	0.90856	0.968045	0.968706	0.740979	0.822853	0.877691	0.968706	0.679479	0.845279	0.827849	0.920217	0.385494	0.85308	0.922376	0.955787	0.726194	0.835848	0.846741	0.944824	0.780188	0.71207	0.528986	0.00116439
		77G7	0.644457	0.902808	0.983884	0.811873	0.62859	0.907976	0.925495	0.791325	0.818408	0.95762	1	0.832357	0.647451	0.837566	0.952645	0.728926	0.602798	0.769415	0.567262	0.766911	0.80476	0.799262	0.983859	0.856391	0.834272	0.91225	0.971817	0.753752	0.796246	0.894028	0.971817	0.819362	0.792268	0.822169	0.891358	0.336696	0.812522	0.861988	0.923768	0.73964	0.90681	0.928616	0.976976	0.87723	0.623629	0.469508	-0.0181641
		TauAB	0.444664	0.68767	0.828381	0.951466	0.350383	0.750771	0.685294	0.880901	0.579814	0.731121	0.832357	1	0.398028	0.555963	0.763108	0.862541	0.355595	0.481648	0.645854	0.480958	0.58237	0.540479	0.800494	0.943865	0.642514	0.730146	0.766345	0.926044	0.643867	0.768845	0.766345	0.93869	0.694853	0.741639	0.631141	0.590782	0.757534	0.797035	0.710706	0.930026	0.816668	0.850627	0.842937	0.911222	0.622229	0.586221	0.26049
	68-97 1N	Tau12	0.96348	0.841398	0.707299	0.509774	0.96717	0.794254	0.823109	0.440285	0.953065	0.76145	0.647451	0.398028	1	0.911122	0.754426	0.42977	0.967493	0.937892	0.373098	0.723025	0.962153	0.897102	0.719793	0.426261	0.91684	0.840145	0.780721	0.5047	0.898029	0.773101	0.780721	0.403816	0.905756	0.6563	0.697818	0.214936	0.86033	0.743924	0.880635	0.464541	0.645144	0.58594	0.668341	0.58527	0.819513	0.722702	0.286239
		HT7	0.911089	0.964964	0.872656	0.625052	0.92789	0.924251	0.927388	0.597817	0.964578	0.923545	0.837566	0.555963	0.911122	1	0.888301	0.563068	0.909629	0.988277	0.413882	0.833954	0.959845	0.98736	0.884644	0.61611	0.924519	0.948897	0.911023	0.604268	0.885545	0.888441	0.911023	0.581178	0.87544	0.719977	0.8308	0.227917	0.851689	0.848055	0.955441	0.578232	0.804755	0.773989	0.84306	0.71952	0.748813	0.598657	0.108867
		77G7	0.718018	0.897332	0.978636	0.834495	0.70724	0.87383	0.983244	0.825442	0.859842	0.911968	0.952645	0.763108	0.754426	0.888301	1	0.796063	0.718186	0.849495	0.664799	0.889515	0.85671	0.845651	0.98107	0.855125	0.879172	0.918994	0.978115	0.698218	0.890009	0.938583	0.978115	0.824146	0.863089	0.751863	0.875294	0.237401	0.863104	0.808849	0.956108	0.66131	0.962362	0.938385	0.952522	0.89179	0.688752	0.5866	0.102726
		TauAB	0.409625	0.611562	0.774303	0.960062	0.326895	0.64724	0.710872	0.870639	0.512834	0.587277	0.728926	0.862541	0.42977	0.563068	0.796063	1	0.380316	0.53693	0.702968	0.596952	0.540007	0.523351	0.740345	0.955485	0.565187	0.647377	0.700554	0.728651	0.690696	0.813603	0.700554	0.974378	0.651278	0.531568	0.492618	0.271844	0.688276	0.615738	0.664841	0.711555	0.890685	0.877046	0.760085	0.929355	0.523453	0.575667	0.305085
	68-87 2N	Tau12	0.97401	0.830847	0.67805	0.470211	0.987787	0.759356	0.797283	0.455239	0.940999	0.753199	0.602798	0.355595	0.967493	0.909629	0.718186	0.380316	1	0.92997	0.381237	0.771441	0.937842	0.926818	0.700901	0.389258	0.910725	0.841366	0.756997	0.517738	0.854829	0.729282	0.756997	0.351741	0.889419	0.602618	0.70993	0.276739	0.846605	0.731889	0.85455	0.46908	0.621764	0.540542	0.644876	0.519525	0.852459	0.746718	0.307806
		HT7	0.918129	0.924428	0.809943	0.581121	0.94253	0.877059	0.890171	0.544979	0.951286	0.864053	0.769415	0.481648	0.937892	0.988277	0.849495	0.53693	0.92997	1	0.374536	0.817517	0.949205	0.974584	0.824478	0.553358	0.895396	0.90331	0.860902	0.541989	0.875523	0.856258	0.860902	0.52652	0.85872	0.68797	0.765603	0.183847	0.823956	0.795862	0.925891	0.505357	0.759179	0.716169	0.791314	0.665524	0.739381	0.601848	0.126935
		77G7	0.33951	0.422395	0.631057	0.726956	0.302922	0.397698	0.602055	0.765621	0.449728	0.476732	0.567262	0.645854	0.373098	0.413882	0.664799	0.702968	0.381237	0.374536	1	0.649457	0.442247	0.396917	0.626264	0.703168	0.542199	0.522038	0.619482	0.662339	0.575841	0.561346	0.619482	0.682982	0.648441	0.465572	0.616069	0.433619	0.656624	0.526795	0.574	0.608589	0.684603	0.632664	0.620534	0.639405	0.57722	0.718387	0.475069
		TauAB	0.684768	0.763105	0.821912	0.614739	0.728692	0.668101	0.900783	0.714769	0.792116	0.781426	0.766911	0.480958	0.723025	0.833954	0.889515	0.596952	0.771441	0.817517	0.649457	1	0.766512	0.820767	0.855667	0.632755	0.806765	0.804557	0.865226	0.50164	0.78126	0.765288	0.865226	0.57917	0.772478	0.576068	0.844155	0.149668	0.745078	0.614168	0.854913	0.42289	0.830956	0.742057	0.807238	0.638426	0.659527	0.552647	0.0919206
	212-221	Tau12	0.96671	0.949545	0.852332	0.646964	0.947364	0.91856	0.912024	0.580966	0.993324	0.895711	0.80476	0.58237	0.962153	0.959845	0.85671	0.540007	0.937842	0.949205	0.442247	0.766512	1	0.951831	0.856997	0.596481	0.980328	0.95299	0.895016	0.651533	0.945777	0.881648	0.895016	0.562044	0.953102	0.736644	0.803607	0.299348	0.933638	0.87636	0.956859	0.626312	0.774798	0.743151	0.810503	0.725716	0.838091	0.719789	0.211545
		HT7	0.932372	0.960971	0.842547	0.605481	0.940552	0.911987	0.892817	0.584386	0.959586	0.912628	0.799262	0.540479	0.897102	0.98736	0.845651	0.523351	0.926818	0.974584	0.396917	0.820767	0.951831	1	0.856457	0.587228	0.924029	0.951217	0.881673	0.624529	0.870265	0.865168	0.881673	0.54388	0.87515	0.688683	0.805617	0.283128	0.85749	0.864111	0.93045	0.594613	0.775889	0.740681	0.823889	0.673785	0.771603	0.626896	0.106118
		77G7	0.720292	0.925551	0.995165	0.819853	0.706321	0.907993	0.96975	0.822981	0.869428	0.962023	0.983859	0.800494	0.719793	0.884644	0.98107	0.740345	0.700901	0.824478	0.626264	0.855667	0.856997	0.856457	1	0.849855	0.893687	0.947797	0.993129	0.755134	0.857731	0.919947	0.993129	0.806913	0.856844	0.793805	0.918247	0.33115	0.868675	0.863662	0.959052	0.728349	0.938601	0.930866	0.975175	0.877054	0.702397	0.563995	0.059267
		TauAB	0.444636	0.713342	0.879608	0.974772	0.359727	0.749569	0.780235	0.90172	0.582007	0.729423	0.856391	0.943865	0.426261	0.61611	0.855125	0.955485	0.389258	0.553358	0.703168	0.632755	0.596481	0.587228	0.849855	1	0.648012	0.751715	0.802927	0.809778	0.715761	0.857859	0.802927	0.993654	0.692228	0.623133	0.633192	0.351765	0.743634	0.734794	0.73832	0.802209	0.934352	0.946997	0.866278	0.960792	0.545128	0.539757	0.17327
	243-254	Tau12	0.934934	0.934458	0.885469	0.695216	0.90668	0.896837	0.929583	0.667345	0.980962	0.90856	0.834272	0.642514	0.91684	0.924519	0.879172	0.565187	0.910725	0.895396	0.542199	0.806765	0.980328	0.924029	0.893687	0.648012	1	0.963852	0.924435	0.715226	0.945782	0.87385	0.924435	0.601781	0.975159	0.752195	0.857964	0.375957	0.965811	0.882572	0.963976	0.682209	0.80822	0.76846	0.843768	0.74896	0.876044	0.761205	0.238567
		HT7	0.885711	0.98869	0.948334	0.75823	0.851703	0.966841	0.94822	0.713084	0.953153	0.968045	0.91225	0.730146	0.840145	0.948897	0.918994	0.647377	0.841366	0.90331	0.522038	0.804557	0.95299	0.951217	0.947797	0.751715	0.963852	1	0.955395	0.755903	0.921855	0.937547	0.955395	0.705876	0.926116	0.751969	0.861952	0.357581	0.933771	0.938546	0.967848	0.738872	0.879082	0.868843	0.915299	0.820726	0.789558	0.665577	0.113327
		77G7	0.768356	0.933662	0.982622	0.790085	0.765254	0.910143	0.974388	0.801306	0.91096	0.968706	0.971817	0.766345	0.780721	0.911023	0.978115	0.700554	0.756997	0.860902	0.619482	0.865226	0.895016	0.881673	0.993129	0.802927	0.924435	0.955395	1	0.749877	0.87561	0.907897	1	0.760239	0.889702	0.831178	0.937685	0.355502	0.891341	0.872815	0.982259	0.716205	0.910274	0.894687	0.968483	0.84696	0.749534	0.602551	0.097145
		TauAB	0.581844	0.699349	0.764274	0.869464	0.510434	0.737496	0.64508	0.863343	0.668629	0.740979	0.753752	0.926044	0.5047	0.604268	0.698218	0.728651	0.517738	0.541989	0.662339	0.50164	0.651533	0.624529	0.755134	0.809778	0.715226	0.755903	0.749877	1	0.637846	0.691653	0.749877	0.793548	0.777439	0.806472	0.683592	0.811101	0.825196	0.853599	0.735285	0.987904	0.709778	0.711	0.800566	0.789733	0.811092	0.762266	0.452191
	275-286 3R	Tau12	0.892022	0.897858	0.871431	0.760937	0.828412	0.871236	0.929246	0.646145	0.915996	0.822853	0.796246	0.643867	0.898029	0.885545	0.890009	0.690696	0.854829	0.875523	0.575841	0.78126	0.945777	0.870265	0.857731	0.715761	0.945782	0.921855	0.87561	0.637846	1	0.941614	0.87561	0.688076	0.953914	0.618582	0.720932	0.186232	0.947205	0.827722	0.917688	0.608161	0.8731	0.838594	0.809173	0.817311	0.774887	0.750187	0.212463
		HT7	0.785722	0.934536	0.94387	0.850477	0.720459	0.934396	0.941125	0.726203	0.853319	0.877691	0.894028	0.768845	0.773101	0.888441	0.938583	0.813603	0.729282	0.856258	0.561346	0.765288	0.881648	0.865168	0.919947	0.857859	0.87385	0.937547	0.907897	0.691653	0.941614	1	0.907897	0.836847	0.870332	0.635101	0.725546	0.171807	0.884548	0.865013	0.91047	0.683294	0.956561	0.957602	0.891732	0.920111	0.657131	0.614649	0.0895186
		77G7	0.768356	0.933662	0.982622	0.790085	0.765255	0.910143	0.974388	0.801306	0.91096	0.968706	0.971817	0.766345	0.780721	0.911023	0.978115	0.700554	0.756997	0.860902	0.619482	0.865226	0.895016	0.881673	0.993129	0.802927	0.924435	0.955395	1	0.749877	0.87561	0.907897	1	0.760239	0.889702	0.831178	0.937685	0.355502	0.891341	0.872815	0.982259	0.716205	0.910274	0.894687	0.968483	0.84696	0.749534	0.602551	0.0971449
		TauAB	0.409631	0.67305	0.841673	0.975397	0.321647	0.721201	0.740576	0.884953	0.541958	0.679479	0.819362	0.93869	0.403816	0.581178	0.824146	0.974378	0.351741	0.52652	0.682982	0.57917	0.562044	0.54388	0.806913	0.993654	0.601781	0.705876	0.760239	0.793548	0.688076	0.836847	0.760239	1	0.660376	0.605402	0.574364	0.336761	0.710892	0.698911	0.701963	0.791166	0.909318	0.924394	0.827634	0.961992	0.519295	0.529586	0.21472
	299-317 4R	Tau12	0.913687	0.88238	0.856479	0.769817	0.866149	0.855566	0.892943	0.726954	0.946753	0.845279	0.792268	0.694853	0.905756	0.87544	0.863089	0.651278	0.889419	0.85872	0.648441	0.772478	0.953102	0.87515	0.856844	0.692228	0.975159	0.926116	0.889702	0.777439	0.953914	0.870332	0.889702	0.660376	1	0.752161	0.798759	0.450952	0.993281	0.880112	0.938228	0.737799	0.81322	0.765979	0.826015	0.781239	0.917758	0.869629	0.382581
		HT7	0.620684	0.73583	0.767916	0.6707	0.646678	0.752347	0.708801	0.722177	0.782937	0.827849	0.822169	0.741639	0.6563	0.719977	0.751863	0.531568	0.602618	0.68797	0.465572	0.576068	0.736644	0.688683	0.793805	0.623133	0.752195	0.751969	0.831178	0.806472	0.618582	0.635101	0.831178	0.605402	0.752161	1	0.822158	0.668278	0.753006	0.791804	0.835439	0.768248	0.618621	0.620378	0.843969	0.660464	0.762534	0.559078	0.23424
		77G7	0.683338	0.829604	0.885946	0.608189	0.72968	0.7855	0.88202	0.704684	0.847739	0.920217	0.891358	0.631141	0.697818	0.8308	0.875294	0.492618	0.70993	0.765603	0.616069	0.844155	0.803607	0.805617	0.918247	0.633192	0.857964	0.861952	0.937685	0.683592	0.720932	0.725546	0.937685	0.574364	0.798759	0.822158	1	0.430956	0.786711	0.78355	0.909172	0.646487	0.752241	0.725712	0.875093	0.669457	0.724934	0.542038	0.128979
		TauAB	0.304845	0.289365	0.311543	0.457845	0.283313	0.319764	0.183618	0.526783	0.354723	0.385494	0.336696	0.590782	0.214936	0.227917	0.237401	0.271844	0.276739	0.183847	0.433619	0.149668	0.299348	0.283128	0.33115	0.351765	0.375957	0.357581	0.355502	0.811101	0.186232	0.171807	0.355502	0.336761	0.450952	0.668278	0.430956	1	0.487197	0.543343	0.360694	0.785997	0.194001	0.182606	0.418119	0.296482	0.674244	0.610299	0.537981
	354-369	Tau12	0.888514	0.886274	0.874083	0.816098	0.823221	0.87006	0.885433	0.761582	0.925132	0.85308	0.812522	0.757534	0.86033	0.851689	0.863104	0.688276	0.846605	0.823956	0.656624	0.745078	0.933638	0.85749	0.868675	0.743634	0.965811	0.933771	0.891341	0.825196	0.947205	0.884548	0.891341	0.710892	0.993281	0.753006	0.786711	0.487197	1	0.904071	0.927599	0.79186	0.83536	0.799005	0.845977	0.816804	0.908922	0.865502	0.366128
		HT7	0.818772	0.929821	0.876142	0.760856	0.761697	0.944837	0.813818	0.66278	0.877824	0.922376	0.861988	0.797035	0.743924	0.848055	0.808849	0.615738	0.731889	0.795862	0.526795	0.614168	0.87636	0.864111	0.863662	0.734794	0.882572	0.938546	0.872815	0.853599	0.827722	0.865013	0.872815	0.698911	0.880112	0.791804	0.78355	0.543343	0.904071	1	0.885435	0.853773	0.776065	0.805492	0.877027	0.782814	0.768473	0.690858	0.169937
		77G7	0.863558	0.952653	0.947631	0.756992	0.861969	0.924892	0.969781	0.754833	0.96732	0.955787	0.923768	0.710706	0.880635	0.955441	0.956108	0.664841	0.85455	0.925891	0.574	0.854913	0.956859	0.93045	0.959052	0.73832	0.963976	0.967848	0.982259	0.735285	0.917688	0.91047	0.982259	0.701963	0.938228	0.835439	0.909172	0.360694	0.927599	0.885435	1	0.69919	0.873686	0.845095	0.930072	0.817301	0.818581	0.676479	0.178285
		TauAB	0.556145	0.693757	0.747739	0.850013	0.473323	0.750295	0.612749	0.809497	0.634702	0.726194	0.73964	0.930026	0.464541	0.578232	0.66131	0.711555	0.46908	0.505357	0.608589	0.42289	0.626312	0.594613	0.728349	0.802209	0.682209	0.738872	0.716205	0.987904	0.608161	0.683294	0.716205	0.791166	0.737799	0.768248	0.646487	0.785997	0.79186	0.853773	0.69919	1	0.68407	0.70471	0.761185	0.798914	0.762806	0.720137	0.450548
	407-438	Tau12	0.644448	0.849511	0.954485	0.906304	0.589222	0.838952	0.935264	0.852592	0.759559	0.835848	0.90681	0.816668	0.645144	0.804755	0.962362	0.890685	0.621764	0.759179	0.684603	0.830956	0.774798	0.775889	0.938601	0.934352	0.80822	0.879082	0.910274	0.709778	0.8731	0.956561	0.910274	0.909318	0.81322	0.618621	0.752241	0.194001	0.83536	0.776065	0.873686	0.68407	1	0.982197	0.914108	0.940831	0.620733	0.581132	0.100674
		HT7	0.59642	0.853489	0.956808	0.90056	0.528787	0.865846	0.903996	0.800974	0.723277	0.846741	0.928616	0.850627	0.58594	0.773989	0.938385	0.877046	0.540542	0.716169	0.632664	0.742057	0.743151	0.740681	0.930866	0.946997	0.76846	0.868843	0.894687	0.711	0.838594	0.957602	0.894687	0.924394	0.765979	0.620378	0.725712	0.182606	0.799005	0.805492	0.845095	0.70471	0.982197	1	0.917346	0.951413	0.540457	0.501906	0.0112571
		77G7	0.671026	0.893183	0.968447	0.847705	0.65475	0.884238	0.91434	0.850724	0.831331	0.944824	0.976976	0.842937	0.668341	0.84306	0.952522	0.760085	0.644876	0.791314	0.620534	0.807238	0.810503	0.823889	0.975175	0.866278	0.843768	0.915299	0.968483	0.800566	0.809173	0.891732	0.968483	0.827634	0.826015	0.843969	0.875093	0.418119	0.845977	0.877027	0.930072	0.761185	0.914108	0.917346	1	0.855488	0.683642	0.546996	0.016117
		TauAB	0.586068	0.799154	0.911273	0.952434	0.502163	0.841455	0.849004	0.845394	0.697668	0.780188	0.87723	0.911222	0.58527	0.71952	0.89179	0.929355	0.519525	0.665524	0.639405	0.638426	0.725716	0.673785	0.877054	0.960792	0.74896	0.820726	0.84696	0.789733	0.817311	0.920111	0.84696	0.961992	0.781239	0.660464	0.669457	0.296482	0.816804	0.782814	0.817301	0.798914	0.940831	0.951413	0.855488	1	0.6252	0.601527	0.253967
SI	6-23	HT7	0.84756	0.728806	0.683788	0.668186	0.822914	0.699483	0.71551	0.715958	0.854887	0.71207	0.623629	0.622229	0.819513	0.748813	0.688752	0.523453	0.852459	0.739381	0.57722	0.659527	0.838091	0.771603	0.702397	0.545128	0.876044	0.789558	0.749534	0.811092	0.774887	0.657131	0.749534	0.519295	0.917758	0.762534	0.724934	0.674244	0.908922	0.768473	0.818581	0.762806	0.620733	0.540457	0.683642	0.6252	1	0.916289	0.598987
		77G7	0.751546	0.587025	0.569859	0.681048	0.681757	0.567756	0.601874	0.650042	0.709004	0.528986	0.469508	0.586221	0.722702	0.598657	0.5866	0.575667	0.746718	0.601848	0.718387	0.552647	0.719789	0.626896	0.563995	0.539757	0.761205	0.665577	0.602551	0.762266	0.750187	0.614649	0.602551	0.529586	0.869629	0.559078	0.542038	0.610299	0.865502	0.690858	0.676479	0.720137	0.581132	0.501906	0.546996	0.601527	0.916289	1	0.728173
		TauAB	0.271097	0.0462511	0.0670484	0.320836	0.241354	0.0674437	0.0925489	0.265584	0.201981	0.00116439	-0.0181641	0.26049	0.286239	0.108867	0.102726	0.305085	0.307806	0.126935	0.475069	0.0919206	0.211545	0.106118	0.059267	0.17327	0.238567	0.113327	0.097145	0.452191	0.212463	0.0895186	0.0971449	0.21472	0.382581	0.23424	0.128979	0.537981	0.366128	0.169937	0.178285	0.450548	0.100674	0.0112571	0.016117	0.253967	0.598987	0.728173	1
	25-44	HT7	0.897892	0.718318	0.600162	0.379699	0.922741	0.644051	0.704542	0.393062	0.892756	0.701234	0.547742	0.318318	0.905714	0.785734	0.628464	0.227473	0.928905	0.795967	0.448677	0.693547	0.869582	0.804931	0.635835	0.276859	0.87992	0.756731	0.711059	0.531838	0.764384	0.57672	0.71106	0.227443	0.869143	0.666828	0.747591	0.433064	0.823286	0.699039	0.799252	0.469357	0.483594	0.406001	0.594373	0.391236	0.87508	0.772341	0.354157
		77G7	0.639248	0.385765	0.329342	0.500552	0.594955	0.384355	0.371199	0.442102	0.578276	0.331826	0.259922	0.425032	0.653568	0.434837	0.367272	0.396261	0.642753	0.475844	0.523941	0.319917	0.580597	0.453433	0.332503	0.310156	0.587629	0.449058	0.399583	0.644811	0.558351	0.382481	0.399583	0.326032	0.720861	0.557059	0.354362	0.657704	0.700767	0.524475	0.510884	0.596482	0.31585	0.236525	0.35339	0.393925	0.851698	0.918451	0.798647
		TauAB	0.138672	-0.144892	-0.162913	0.147291	0.122239	-0.131966	-0.153291	0.0870256	0.0462549	-0.170685	-0.21962	0.105481	0.148292	-0.071575	-0.121201	0.108628	0.181283	-0.0212214	0.37339	-0.0855108	0.0368921	-0.0406526	-0.158532	-0.0338226	0.0518129	-0.0778729	-0.103767	0.358939	0.0142452	-0.131109	-0.103767	0.00705992	0.225437	0.17808	-0.0571965	0.626055	0.20726	0.0694513	-0.0103511	0.326074	-0.138408	-0.217547	-0.116271	-0.0180419	0.480777	0.64121	0.88633
	45-68 0N	HT7	0.652056	0.606982	0.658218	0.700156	0.643408	0.592642	0.648803	0.815912	0.722457	0.649895	0.624045	0.690351	0.644194	0.618527	0.661793	0.568668	0.676523	0.58993	0.629899	0.619356	0.688725	0.623113	0.683426	0.59554	0.759658	0.683544	0.71719	0.848173	0.630603	0.55508	0.71719	0.577137	0.808896	0.79971	0.731396	0.759223	0.810868	0.664047	0.74712	0.799071	0.596079	0.514282	0.673837	0.635865	0.944972	0.835063	0.649137
		77G7	0.323098	0.366385	0.548985	0.819017	0.250128	0.399988	0.469069	0.852499	0.408864	0.411322	0.510093	0.802822	0.318489	0.317051	0.545072	0.74754	0.316712	0.277804	0.744888	0.410843	0.400516	0.308219	0.541144	0.729029	0.499241	0.464269	0.534141	0.843645	0.477885	0.473833	0.534141	0.739921	0.619562	0.608234	0.476418	0.71063	0.657623	0.500867	0.51568	0.811177	0.587936	0.53354	0.563167	0.69754	0.724159	0.754832	0.688923
		TauAB	-0.0122773	-0.122773	-0.0189267	0.307017	-0.0490913	-0.0643564	-0.0904129	0.348187	-0.00887484	-0.0792152	-0.0368151	0.361269	-0.0215687	-0.134739	-0.0348678	0.242981	-0.005914	-0.151675	0.341067	-0.119138	-0.0250105	-0.134202	-0.0199076	0.179809	0.0474181	-0.0446079	-0.00346317	0.50691	-0.0437393	-0.101673	-0.0034632	0.219857	0.175505	0.299255	0.054551	0.709661	0.197191	0.0650232	0.0197197	0.510662	-0.0251762	-0.0781005	-0.00873361	0.188004	0.464538	0.506178	0.85597
	68-97 1N	HT7	0.854202	0.746853	0.717489	0.62676	0.87054	0.686706	0.796608	0.71759	0.889385	0.736286	0.657465	0.532573	0.875398	0.81823	0.766295	0.523906	0.905909	0.82358	0.57632	0.80514	0.865571	0.821211	0.750573	0.526488	0.89362	0.800429	0.80225	0.693171	0.804736	0.682595	0.80225	0.496081	0.911198	0.7525	0.786192	0.509943	0.880977	0.699461	0.86825	0.623116	0.670051	0.565983	0.716129	0.610042	0.959156	0.840299	0.500315
		77G7	0.528398	0.480256	0.625064	0.776304	0.495932	0.451265	0.674566	0.806879	0.600264	0.474513	0.552727	0.61851	0.617607	0.533337	0.716517	0.763525	0.585588	0.550918	0.787045	0.694139	0.602331	0.498786	0.632257	0.676084	0.658555	0.567017	0.654998	0.640945	0.71255	0.622637	0.654998	0.681608	0.76712	0.585429	0.556036	0.385929	0.754861	0.477147	0.679095	0.559614	0.709047	0.604894	0.627863	0.692922	0.763678	0.802785	0.579614
		TauAB	0.15567	-0.0433662	0.0704855	0.453701	0.100924	-0.0276709	0.105143	0.445731	0.125302	-0.0836426	-0.00487972	0.319663	0.234319	0.0184984	0.158972	0.473361	0.202824	0.0702594	0.504998	0.133995	0.141712	-0.000767467	0.0635162	0.28914	0.180107	0.0431721	0.0928163	0.399831	0.251997	0.123627	0.0928162	0.341816	0.359091	0.232413	0.0116233	0.41073	0.351685	0.052398	0.155238	0.346806	0.195639	0.0909828	0.081944	0.309083	0.518928	0.663416	0.829461
	68-87 2N	HT7	0.750318	0.523304	0.476179	0.510701	0.73746	0.479694	0.549372	0.574928	0.728611	0.502456	0.410891	0.434037	0.757673	0.582541	0.515846	0.372877	0.785224	0.604325	0.494891	0.549966	0.709358	0.605712	0.505513	0.347264	0.749037	0.59745	0.571692	0.655206	0.652743	0.459752	0.571692	0.330032	0.811794	0.654172	0.565279	0.63069	0.787377	0.561695	0.66469	0.584495	0.43156	0.321332	0.493114	0.431792	0.951365	0.886339	0.660446
		77G7	0.460748	0.315461	0.417125	0.567443	0.461323	0.267117	0.497362	0.620473	0.511851	0.319989	0.363612	0.401908	0.583374	0.414319	0.539166	0.544731	0.545471	0.471557	0.674103	0.583323	0.498435	0.390149	0.442265	0.429857	0.535031	0.399283	0.494915	0.484993	0.574049	0.42115	0.494915	0.437227	0.657978	0.543748	0.427594	0.385195	0.624216	0.341725	0.547678	0.372158	0.482967	0.368454	0.481721	0.433872	0.692233	0.736112	0.525925
		TauAB	0.192857	-0.0696483	-0.0204105	0.315247	0.131561	-0.0426983	0.00985085	0.279927	0.14741	-0.0990725	-0.063293	0.23657	0.273915	-0.0315161	0.0446476	0.260496	0.199036	0.0310873	0.365664	-0.0302033	0.160354	-0.0427706	-0.0247995	0.116517	0.183321	0.00705775	0.0331128	0.355821	0.224444	0.0321108	0.0331127	0.16312	0.356314	0.297518	-0.0335702	0.472273	0.344468	0.0915289	0.119809	0.301415	0.0277746	-0.0429946	0.0272152	0.161228	0.507075	0.634785	0.723318
	212-221	HT7	0.918939	0.848381	0.762675	0.617723	0.90818	0.774332	0.824627	0.655084	0.915732	0.809993	0.688001	0.528094	0.862552	0.877802	0.774008	0.497795	0.938283	0.868414	0.542484	0.835456	0.899694	0.922691	0.786135	0.550115	0.925604	0.891716	0.81839	0.687582	0.851974	0.767516	0.81839	0.495316	0.916658	0.644874	0.775078	0.446576	0.90347	0.808353	0.872123	0.626313	0.723967	0.6446	0.759989	0.598465	0.893769	0.801576	0.288398
		77G7	0.563643	0.614669	0.754951	0.857405	0.493219	0.582497	0.744496	0.853127	0.628509	0.61308	0.668706	0.739875	0.555928	0.592167	0.782345	0.811534	0.578095	0.56357	0.927922	0.754315	0.634325	0.599621	0.745883	0.810162	0.718725	0.707502	0.736988	0.75939	0.772174	0.749479	0.736988	0.783851	0.811569	0.524634	0.644936	0.434843	0.82925	0.675065	0.718354	0.698858	0.832537	0.769194	0.744693	0.766361	0.725359	0.826638	0.429032
		TauAB	-0.0397538	-0.148499	0.0185963	0.440247	-0.134236	-0.146324	0.0226267	0.346262	-0.0936682	-0.207782	-0.0937663	0.271621	-0.0183211	-0.13015	0.0900747	0.51839	0.000228086	-0.100561	0.645082	0.120345	-0.0573631	-0.120445	-0.0123995	0.344216	0.00706215	-0.0502792	-0.030221	0.283076	0.170212	0.116102	-0.0302211	0.382051	0.200447	-0.110923	-0.133119	0.204907	0.216834	-0.0259263	-0.0222093	0.241211	0.235871	0.153044	0.00438279	0.270416	0.247515	0.549737	0.646978
	243-254	HT7	0.492157	0.299923	0.288848	0.386649	0.498423	0.293918	0.293604	0.463441	0.485908	0.329334	0.248859	0.401917	0.479867	0.345019	0.29218	0.25359	0.528228	0.339705	0.498395	0.300242	0.450982	0.365936	0.314714	0.236259	0.505142	0.375341	0.373414	0.669088	0.346707	0.204201	0.373414	0.235273	0.591645	0.593484	0.469272	0.813153	0.576562	0.440004	0.444367	0.635552	0.204564	0.118708	0.304596	0.298304	0.835118	0.804419	0.851501
		77G7	0.387881	0.162741	0.172993	0.378697	0.362021	0.175394	0.16982	0.355775	0.36213	0.174415	0.129634	0.370929	0.403277	0.197739	0.191105	0.263858	0.404618	0.215756	0.549756	0.153707	0.345033	0.212946	0.182126	0.201385	0.388418	0.243972	0.244692	0.610847	0.306255	0.142567	0.244692	0.218698	0.53282	0.502248	0.29419	0.771055	0.519667	0.373268	0.323139	0.572082	0.128305	0.0598025	0.208978	0.246159	0.734231	0.816787	0.86835
		TauAB	0.0799696	-0.147296	-0.163627	0.014592	0.082393	-0.111245	-0.178143	0.0143369	0.0238665	-0.126507	-0.187635	0.0846898	0.0634983	-0.115265	-0.182667	-0.0735324	0.0985794	-0.119667	0.163377	-0.194123	0.00373263	-0.103848	-0.153137	-0.123217	0.0435545	-0.0927493	-0.105283	0.32805	-0.105631	-0.2361	-0.105283	-0.0935722	0.133663	0.211653	0.035983	0.640042	0.123888	0.0179169	-0.0361586	0.346193	-0.240499	-0.297676	-0.183829	-0.044919	0.450402	0.470383	0.865879
	275-286 3R	HT7	0.807905	0.785741	0.791984	0.769754	0.789856	0.731679	0.871217	0.760214	0.839519	0.721384	0.708568	0.590934	0.847489	0.85096	0.870348	0.761637	0.848207	0.873406	0.66083	0.872767	0.848182	0.840154	0.798304	0.706954	0.845738	0.822076	0.819836	0.62627	0.90277	0.857513	0.819836	0.692043	0.891518	0.607073	0.678937	0.241754	0.869697	0.700714	0.868008	0.556301	0.854607	0.767663	0.781462	0.755661	0.793612	0.779329	0.340704
		77G7	0.50605	0.636643	0.778026	0.824602	0.507387	0.606326	0.802408	0.841324	0.629467	0.633319	0.72986	0.664274	0.594185	0.694452	0.869852	0.885416	0.567576	0.701536	0.753449	0.832242	0.628843	0.645628	0.780907	0.816538	0.642036	0.673609	0.774606	0.594848	0.731014	0.786597	0.774606	0.81892	0.704906	0.584633	0.64096	0.187129	0.694491	0.560766	0.761185	0.527463	0.875823	0.808988	0.788437	0.799146	0.583609	0.587881	0.273448
		TauAB	0.339854	0.355341	0.412518	0.550933	0.386254	0.297215	0.451525	0.665368	0.38422	0.338612	0.36299	0.378375	0.382851	0.479688	0.524754	0.637881	0.458981	0.527213	0.498218	0.652198	0.356003	0.487624	0.440938	0.506638	0.350453	0.38674	0.442262	0.436474	0.385253	0.439732	0.442262	0.516831	0.426	0.382447	0.353412	0.27463	0.408301	0.291733	0.462049	0.344889	0.543271	0.431898	0.49666	0.431834	0.484455	0.468198	0.330053
	299-317 4R	HT7	-0.075143	-0.228351	-0.130175	0.146557	-0.0865995	-0.183141	-0.184958	0.199938	-0.0683012	-0.159497	-0.135804	0.216872	-0.0628032	-0.221411	-0.138763	0.0659864	-0.0511501	-0.232282	0.312942	-0.179818	-0.0957159	-0.222259	-0.11998	0.0141988	-0.0188812	-0.146216	-0.0865672	0.396933	-0.138656	-0.242135	-0.0865672	0.0473552	0.104132	0.262722	0.0327583	0.696947	0.111153	-0.0218133	-0.0595056	0.391555	-0.171591	-0.225366	-0.108307	0.0236754	0.405586	0.451248	0.82871
		77G7	-0.330786	-0.474627	-0.341892	0.0145343	-0.359103	-0.415757	-0.416466	0.0319244	-0.329251	-0.400517	-0.332211	0.0843112	-0.298191	-0.485021	-0.343731	-0.0367603	-0.319253	-0.480111	0.252895	-0.399932	-0.347293	-0.487693	-0.343005	-0.111648	-0.274966	-0.393684	-0.317058	0.211452	-0.330112	-0.425315	-0.317058	-0.0667854	-0.120204	0.0649924	-0.219431	0.566176	-0.106574	-0.214069	-0.306646	0.202792	-0.346363	-0.371963	-0.288442	-0.150909	0.137157	0.27323	0.684172
		TauAB	-0.285295	-0.428647	-0.337488	-0.000411632	-0.295586	-0.363147	-0.411638	0.057613	-0.290665	-0.362302	-0.319159	0.0873024	-0.266863	-0.425831	-0.346571	-0.0498141	-0.271373	-0.42143	0.120481	-0.407422	-0.315107	-0.427872	-0.332445	-0.126814	-0.261168	-0.366429	-0.305409	0.235353	-0.355807	-0.427098	-0.305409	-0.0760001	-0.130754	0.117213	-0.203891	0.604849	-0.118381	-0.20666	-0.281277	0.239008	-0.361424	-0.39307	-0.287921	-0.139058	0.183431	0.243192	0.720401
	354-369	HT7	-0.122671	-0.278556	-0.177102	0.123313	-0.136961	-0.230549	-0.231642	0.166129	-0.124859	-0.217462	-0.186671	0.185762	-0.109351	-0.268961	-0.181935	0.0594007	-0.0970694	-0.276073	0.297755	-0.219487	-0.148125	-0.270217	-0.170392	-0.00730826	-0.0749169	-0.198073	-0.14061	0.357813	-0.179019	-0.2761	-0.14061	0.0311485	0.0554473	0.203073	-0.0274014	0.66129	0.0630177	-0.0714533	-0.11369	0.355612	-0.201896	-0.255575	-0.158602	-0.00207811	0.357473	0.424013	0.835121
		77G7	-0.22904	-0.371289	-0.244203	0.0986202	-0.259395	-0.320492	-0.321441	0.114398	-0.22878	-0.29768	-0.24726	0.166989	-0.218798	-0.383721	-0.253867	0.0310656	-0.214337	-0.389099	0.34323	-0.29629	-0.25088	-0.37552	-0.243111	-0.0300697	-0.16739	-0.281511	-0.218286	0.323968	-0.24346	-0.337388	-0.218286	0.00601706	-0.0140733	0.134803	-0.11172	0.65671	0.0020158	-0.106561	-0.207278	0.313508	-0.254558	-0.290428	-0.197621	-0.0701646	0.255148	0.38371	0.753385
		TauAB	-0.227579	-0.390945	-0.302626	0.0224933	-0.234897	-0.337085	-0.363862	0.0865322	-0.237014	-0.326559	-0.294912	0.0967598	-0.210581	-0.378181	-0.305697	-0.0335628	-0.203104	-0.373086	0.172805	-0.340932	-0.263747	-0.375828	-0.293613	-0.110971	-0.203217	-0.320735	-0.262493	0.265562	-0.305632	-0.394965	-0.262493	-0.0655994	-0.0718774	0.140883	-0.152338	0.630661	-0.0636327	-0.174449	-0.233298	0.261556	-0.326035	-0.371171	-0.256845	-0.120279	0.248567	0.308611	0.762233
	407-438	HT7	0.654055	0.515677	0.52671	0.687367	0.592568	0.469808	0.602686	0.619477	0.603899	0.415038	0.404274	0.477377	0.670511	0.578009	0.610704	0.693288	0.691685	0.62137	0.722191	0.646884	0.629737	0.596201	0.517144	0.572255	0.641088	0.581708	0.538826	0.565088	0.749529	0.65386	0.538826	0.574581	0.7668	0.36273	0.391336	0.296262	0.752083	0.533964	0.606853	0.494133	0.656479	0.555494	0.519001	0.58982	0.726126	0.873203	0.557827
		77G7	0.776823	0.733492	0.752703	0.824944	0.707124	0.696515	0.787968	0.793717	0.771375	0.663842	0.646706	0.676243	0.752415	0.743272	0.787948	0.777053	0.782103	0.742614	0.768158	0.766343	0.788769	0.763563	0.743202	0.742658	0.822866	0.798553	0.752593	0.749218	0.875804	0.821976	0.752593	0.723772	0.90396	0.542156	0.619276	0.408495	0.907182	0.747297	0.792433	0.695596	0.824756	0.747507	0.728872	0.765398	0.840025	0.907193	0.486265
		TauAB	0.426417	0.389481	0.493435	0.667978	0.33559	0.355406	0.562848	0.584717	0.388334	0.278352	0.348129	0.445123	0.429739	0.411258	0.562318	0.741033	0.457477	0.416049	0.659821	0.591592	0.44	0.406163	0.464075	0.627301	0.485492	0.459561	0.436928	0.396786	0.648045	0.614178	0.436928	0.632356	0.575683	0.0769122	0.272723	-0.00231818	0.582336	0.311675	0.450813	0.365396	0.69231	0.594403	0.389107	0.64343	0.490568	0.653927	0.471497
			Tau12	HT7	77G7	TauAB	Tau12	HT7	77G7	TauAB	Tau12	HT7	77G7	TauAB	Tau12	HT7	77G7	TauAB	Tau12	HT7	77G7	TauAB	Tau12	HT7	77G7	TauAB	Tau12	HT7	77G7	TauAB	Tau12	HT7	77G7	TauAB	Tau12	HT7	77G7	TauAB	Tau12	HT7	77G7	TauAB	Tau12	HT7	77G7	TauAB	HT7	77G7	TauAB
			6-23				25-44				45-68 0N				68-97 1N				68-87 2N				212-221				243-254				275-286 3R				299-317 4R				354-369				407-438				6-23
			TBS																																												SI
[truncated: 33 more columns]

## Sheet: e) PiD
e)
			TBS																																												SI
			6-23				25-44				45-68 0N				68-97 1N				68-87 2N				212-221				243-254				275-286 3R				299-317 4R				354-369				407-438				6-23
		PiD	Tau12	HT7	77G7	TauAB	Tau12	HT7	77G7	TauAB	Tau12	HT7	77G7	TauAB	Tau12	HT7	77G7	TauAB	Tau12	HT7	77G7	TauAB	Tau12	HT7	77G7	TauAB	Tau12	HT7	77G7	TauAB	Tau12	HT7	77G7	TauAB	Tau12	HT7	77G7	TauAB	Tau12	HT7	77G7	TauAB	Tau12	HT7	77G7	TauAB	HT7	77G7	TauAB
TBS	6-23	Tau12	1	0.928141	0.941533	0.866372	0.979594	0.645017	0.951534	0.809712	0.923543	0.616519	0.566666	0.866838	0.977639	0.938042	0.824338	0.897215	0.947546	0.892142	0.829379	0.730732	0.910126	0.710042	0.779975	0.888326	0.895445	0.790474	0.775555	0.914129	0.901426	0.798486	0.775555	0.860928	0.885966	0.648409	0.649033	0.959646	0.968899	0.960622	0.764156	0.939676	0.896205	0.909629	0.939618	0.925126	0.525517	0.622004	0.404585
		HT7	0.928141	1	0.90272	0.704932	0.861671	0.683667	0.852909	0.635325	0.925302	0.842657	0.6555	0.727297	0.914041	0.979291	0.821571	0.732811	0.847631	0.899649	0.855221	0.57917	0.913708	0.894045	0.822885	0.741164	0.899143	0.905331	0.826082	0.772189	0.832296	0.870605	0.826082	0.704855	0.866532	0.848804	0.740345	0.858388	0.841131	0.930101	0.828892	0.829049	0.740285	0.800558	0.838707	0.793839	0.539517	0.546212	0.363024
		77G7	0.941533	0.90272	1	0.798956	0.886034	0.622323	0.987925	0.720712	0.922666	0.604317	0.792345	0.821013	0.96568	0.924865	0.957297	0.846163	0.870687	0.804005	0.931588	0.618204	0.937378	0.688651	0.932434	0.849788	0.937752	0.846919	0.927061	0.850219	0.882899	0.772857	0.927061	0.761253	0.939137	0.686198	0.834795	0.932844	0.927686	0.876386	0.915429	0.876143	0.861232	0.879645	0.96147	0.879277	0.405808	0.471121	0.167967
		TauAB	0.866372	0.704932	0.798956	1	0.919576	0.460136	0.863305	0.980976	0.686355	0.343929	0.367552	0.980295	0.84689	0.742705	0.672202	0.992349	0.823178	0.660868	0.618347	0.951048	0.625803	0.374588	0.547449	0.993195	0.6023	0.432966	0.528765	0.989108	0.760816	0.559042	0.528765	0.978911	0.61249	0.273676	0.355337	0.953494	0.947787	0.866462	0.508215	0.933209	0.989862	0.972075	0.898986	0.962958	0.206201	0.438988	0.361816
	25-44	Tau12	0.979594	0.861671	0.886034	0.919576	1	0.547527	0.940497	0.869156	0.843249	0.512201	0.44033	0.899586	0.952982	0.892311	0.750338	0.940464	0.947983	0.873304	0.764063	0.82407	0.82964	0.621955	0.675623	0.930233	0.799941	0.67103	0.665702	0.946982	0.859665	0.71383	0.665702	0.907344	0.803973	0.516766	0.516032	0.965446	0.972302	0.954651	0.649627	0.94505	0.933486	0.941062	0.932978	0.944649	0.461905	0.612906	0.43871
		HT7	0.645017	0.683667	0.622323	0.460136	0.547527	1	0.619312	0.425489	0.790514	0.689507	0.429232	0.58725	0.559382	0.603571	0.503959	0.462073	0.482582	0.525657	0.505977	0.362704	0.654428	0.617077	0.545649	0.466962	0.690091	0.708369	0.562014	0.537348	0.599293	0.675747	0.562014	0.505621	0.629177	0.674316	0.50304	0.544947	0.621226	0.645312	0.584412	0.57646	0.484016	0.499562	0.53587	0.513121	0.51272	0.348237	0.225306
		77G7	0.951534	0.852909	0.987925	0.863305	0.940497	0.619312	1	0.779552	0.920316	0.496135	0.905275	0.894922	0.943368	0.872348	0.966622	0.870847	0.892908	0.833783	0.88292	0.815775	0.876749	0.549117	0.952582	0.880087	0.873642	0.734989	0.928344	0.878312	0.783483	0.573829	0.928344	0.816258	0.864516	0.43024	0.719518	0.925662	0.947218	0.891235	0.911078	0.850812	0.900872	0.920188	0.973684	0.878566	0.360116	0.447827	0.308171
		TauAB	0.809712	0.635325	0.720712	0.980976	0.869156	0.425489	0.779552	1	0.598431	0.267148	0.296692	0.944446	0.786087	0.668574	0.59801	0.969035	0.779307	0.58206	0.51155	0.932901	0.543573	0.289747	0.453484	0.960561	0.521986	0.324969	0.431162	0.969403	0.754309	0.561276	0.431162	0.990813	0.528233	0.201478	0.255979	0.905928	0.90389	0.816356	0.417616	0.929551	0.951172	0.913433	0.816171	0.947106	0.203454	0.469828	0.443976
	45-68 0N	Tau12	0.923543	0.925302	0.922666	0.686355	0.843249	0.790514	0.920316	0.598431	1	0.73693	0.664248	0.749831	0.889164	0.886747	0.815888	0.71744	0.817353	0.814952	0.841898	0.526652	0.925302	0.760271	0.844047	0.721804	0.943583	0.910579	0.855585	0.750286	0.79529	0.750832	0.855585	0.665965	0.901525	0.765393	0.776985	0.837368	0.859024	0.855661	0.842509	0.778306	0.748231	0.777311	0.869541	0.75925	0.509636	0.464708	0.216287
		HT7	0.616519	0.842657	0.604317	0.343929	0.512201	0.689507	0.496135	0.267148	0.73693	1	0.507794	0.424301	0.559409	0.755519	0.525657	0.34331	0.452127	0.658753	0.602297	0.30036	0.652303	0.917923	0.603331	0.369814	0.655476	0.829551	0.628247	0.426589	0.464796	0.712893	0.628247	0.362512	0.596394	0.909016	0.607441	0.523559	0.490559	0.708508	0.645228	0.473011	0.365088	0.471421	0.488507	0.399032	0.529523	0.371651	0.330819
		77G7	0.566666	0.6555	0.792345	0.367552	0.44033	0.429232	0.905275	0.296692	0.664248	0.507794	1	0.407721	0.658473	0.673552	0.912508	0.438528	0.471986	0.435295	0.855629	0.135734	0.740612	0.567284	0.943166	0.453511	0.767553	0.753645	0.94083	0.436501	0.630809	0.630741	0.94083	0.324107	0.766367	0.696965	0.962401	0.5741	0.53656	0.482055	0.947788	0.503198	0.460988	0.490764	0.643871	0.499639	0.183016	0.148397	-0.161545
		TauAB	0.866838	0.727297	0.821013	0.980295	0.899586	0.58725	0.894922	0.944446	0.749831	0.424301	0.407721	1	0.832028	0.744064	0.683104	0.966742	0.781494	0.643478	0.636543	0.933771	0.644707	0.410076	0.583565	0.976062	0.635157	0.497467	0.57193	0.975368	0.732965	0.554089	0.57193	0.951691	0.634368	0.331609	0.406216	0.945786	0.950622	0.870093	0.551647	0.906174	0.979919	0.969968	0.909372	0.933673	0.21067	0.380271	0.295503
	68-97 1N	Tau12	0.977639	0.914041	0.96568	0.84689	0.952982	0.559382	0.943368	0.786087	0.889164	0.559409	0.658473	0.832028	1	0.952448	0.899643	0.891273	0.963867	0.894968	0.891084	0.687491	0.934326	0.695236	0.845953	0.88721	0.910889	0.794501	0.832928	0.889227	0.933546	0.801393	0.832928	0.823416	0.914357	0.634161	0.714312	0.951137	0.950541	0.91825	0.823373	0.931093	0.890311	0.90637	0.956517	0.935094	0.439046	0.558732	0.280855
		HT7	0.938042	0.979291	0.924865	0.742705	0.892311	0.603571	0.872348	0.668574	0.886747	0.755519	0.673552	0.744064	0.952448	1	0.869005	0.781483	0.892279	0.931327	0.906196	0.614838	0.931344	0.871398	0.845817	0.789102	0.898393	0.878715	0.839186	0.802165	0.872583	0.86476	0.839186	0.727822	0.890668	0.800571	0.743653	0.885494	0.866739	0.934446	0.843986	0.859204	0.781475	0.841395	0.878487	0.839377	0.494654	0.541742	0.314654
		77G7	0.824338	0.821571	0.957297	0.672202	0.750338	0.503959	0.966622	0.59801	0.815888	0.525657	0.912508	0.683104	0.899643	0.869005	1	0.737508	0.774901	0.704834	0.95777	0.46042	0.8985	0.646566	0.977336	0.745203	0.896352	0.813375	0.964996	0.726355	0.848216	0.750166	0.964996	0.625438	0.909322	0.679748	0.908929	0.831006	0.810457	0.743124	0.963204	0.778288	0.749346	0.771468	0.881871	0.7891	0.290994	0.352271	0.012317
		TauAB	0.897215	0.732811	0.846163	0.992349	0.940464	0.462073	0.870847	0.969035	0.71744	0.34331	0.438528	0.966742	0.891273	0.781483	0.737508	1	0.864026	0.700558	0.68179	0.912179	0.692512	0.410935	0.617312	0.99558	0.668315	0.488537	0.597356	0.992212	0.817685	0.610467	0.597356	0.971871	0.68635	0.322068	0.431778	0.971393	0.968548	0.88002	0.578991	0.955758	0.992908	0.973498	0.926908	0.981038	0.257498	0.486547	0.353877
	68-87 2N	Tau12	0.947546	0.847631	0.870687	0.823178	0.947983	0.482582	0.892908	0.779307	0.817353	0.452127	0.471986	0.781494	0.963867	0.892279	0.774901	0.864026	1	0.922424	0.772703	0.682101	0.883468	0.622138	0.706796	0.850472	0.847143	0.701377	0.689421	0.853919	0.921358	0.752495	0.689421	0.811764	0.851467	0.516382	0.552504	0.893964	0.910925	0.877266	0.676755	0.910758	0.852985	0.856278	0.892356	0.919105	0.463857	0.616542	0.338112
		HT7	0.892142	0.899649	0.804005	0.660868	0.873304	0.525657	0.833783	0.58206	0.814952	0.658753	0.435295	0.643478	0.894968	0.931327	0.704834	0.700558	0.922424	1	0.780621	0.562891	0.894345	0.831771	0.686739	0.698706	0.84259	0.81776	0.679216	0.712905	0.821134	0.782727	0.679216	0.648157	0.845293	0.696074	0.569342	0.784878	0.794409	0.880541	0.679204	0.78483	0.693699	0.75296	0.792219	0.768079	0.579221	0.620364	0.347722
		77G7	0.829379	0.855221	0.931588	0.618347	0.764063	0.505977	0.88292	0.51155	0.841898	0.602297	0.855629	0.636543	0.891084	0.906196	0.95777	0.68179	0.772703	0.780621	1	0.441341	0.914306	0.75425	0.957119	0.696421	0.896009	0.86852	0.949383	0.673374	0.785362	0.717096	0.949383	0.553375	0.90401	0.746149	0.90051	0.796649	0.774689	0.759533	0.947933	0.712172	0.701478	0.755963	0.866735	0.72439	0.302248	0.310728	-0.00392002
		TauAB	0.730732	0.57917	0.618204	0.951048	0.82407	0.362704	0.815775	0.932901	0.526652	0.30036	0.135734	0.933771	0.687491	0.614838	0.46042	0.912179	0.682101	0.562891	0.441341	1	0.422172	0.287059	0.324428	0.92498	0.383287	0.258472	0.306482	0.913628	0.563398	0.386315	0.306482	0.921842	0.394644	0.12981	0.120599	0.844476	0.829103	0.790528	0.284803	0.810822	0.913526	0.912757	0.771749	0.851054	0.0866473	0.322812	0.369703
	212-221	Tau12	0.910126	0.913708	0.937378	0.625803	0.82964	0.654428	0.876749	0.543573	0.925302	0.652303	0.740612	0.644707	0.934326	0.931344	0.8985	0.692512	0.883468	0.894345	0.914306	0.422172	1	0.802978	0.911061	0.685698	0.991661	0.93533	0.908972	0.704107	0.898152	0.845266	0.908972	0.61114	0.98844	0.794534	0.84169	0.809796	0.829603	0.830926	0.909696	0.793928	0.697236	0.729141	0.853184	0.770132	0.580931	0.570437	0.196509
		HT7	0.710042	0.894045	0.688651	0.374588	0.621955	0.617077	0.549117	0.289747	0.760271	0.917923	0.567284	0.410076	0.695236	0.871398	0.646566	0.410935	0.622138	0.831771	0.75425	0.287059	0.802978	1	0.701926	0.422772	0.773044	0.901488	0.713008	0.468637	0.630456	0.824126	0.713008	0.389283	0.747756	0.953209	0.685763	0.581189	0.560537	0.767137	0.738936	0.560879	0.409816	0.516935	0.567269	0.489591	0.62175	0.501822	0.338433
		77G7	0.779975	0.822885	0.932434	0.547449	0.675623	0.545649	0.952582	0.453484	0.844047	0.603331	0.943166	0.583565	0.845953	0.845817	0.977336	0.617312	0.706796	0.686739	0.957119	0.324428	0.911061	0.701926	1	0.627703	0.922535	0.887876	0.998143	0.616458	0.780052	0.731625	0.998143	0.497183	0.92424	0.763194	0.972384	0.750802	0.733073	0.691607	0.995399	0.677049	0.640477	0.676273	0.823985	0.676403	0.343389	0.325809	-0.0388264
		TauAB	0.888326	0.741164	0.849788	0.993195	0.930233	0.466962	0.880087	0.960561	0.721804	0.369814	0.453511	0.976062	0.88721	0.789102	0.745203	0.99558	0.850472	0.698706	0.696421	0.92498	0.685698	0.422772	0.627703	1	0.660027	0.497926	0.607606	0.98686	0.795653	0.590762	0.607606	0.95981	0.674855	0.326971	0.441852	0.970397	0.96185	0.876842	0.588196	0.940146	0.996846	0.987199	0.936483	0.97511	0.201378	0.421457	0.295876
	243-254	Tau12	0.895445	0.899143	0.937752	0.6023	0.799941	0.690091	0.873642	0.521986	0.943583	0.655476	0.767553	0.635157	0.910889	0.898393	0.896352	0.668315	0.847143	0.84259	0.896009	0.383287	0.991661	0.773044	0.922535	0.660027	1	0.941511	0.92545	0.684911	0.878122	0.8293	0.92545	0.591081	0.987954	0.797443	0.868382	0.794416	0.817844	0.803495	0.922872	0.772109	0.678747	0.701513	0.84067	0.744019	0.586623	0.556789	0.182045
		HT7	0.790474	0.905331	0.846919	0.432966	0.67103	0.708369	0.734989	0.324969	0.910579	0.829551	0.753645	0.497467	0.794501	0.878715	0.813375	0.488537	0.701377	0.81776	0.86852	0.258472	0.93533	0.901488	0.887876	0.497926	0.941511	1	0.901729	0.526006	0.72219	0.794726	0.901728	0.413725	0.916286	0.921632	0.878692	0.664481	0.669937	0.749626	0.906922	0.609923	0.512498	0.583116	0.720041	0.567709	0.587589	0.455714	0.130227
		77G7	0.775555	0.826082	0.927061	0.528765	0.665702	0.562014	0.928344	0.431162	0.855585	0.628247	0.94083	0.57193	0.832928	0.839186	0.964996	0.597356	0.689421	0.679216	0.949383	0.306482	0.908972	0.713008	0.998143	0.607606	0.92545	0.901729	1	0.601317	0.759692	0.725252	1	0.479749	0.923208	0.781509	0.979472	0.7401	0.722423	0.688978	0.995918	0.659356	0.623104	0.66093	0.813226	0.653863	0.364888	0.330357	-0.0287875
		TauAB	0.914129	0.772189	0.850219	0.989108	0.946982	0.537348	0.878312	0.969403	0.750286	0.426589	0.436501	0.975368	0.889227	0.802165	0.726355	0.992212	0.853919	0.712905	0.673374	0.913628	0.704107	0.468637	0.616458	0.98686	0.684911	0.526006	0.601317	1	0.822658	0.660389	0.601317	0.98454	0.694023	0.388955	0.438005	0.977061	0.975959	0.916263	0.587578	0.968454	0.983382	0.969174	0.915061	0.97581	0.328741	0.531919	0.425449
	275-286 3R	Tau12	0.901426	0.832296	0.882899	0.760816	0.859665	0.599293	0.783483	0.754309	0.79529	0.464796	0.630809	0.732965	0.933546	0.872583	0.848216	0.817685	0.921358	0.821134	0.785362	0.563398	0.898152	0.630456	0.780052	0.795653	0.878122	0.72219	0.759692	0.822658	1	0.895432	0.759692	0.793506	0.882236	0.61107	0.651542	0.853729	0.881705	0.835311	0.772858	0.929471	0.789199	0.775491	0.827159	0.902916	0.523311	0.646288	0.351746
		HT7	0.798486	0.870605	0.772857	0.559042	0.71383	0.675747	0.573829	0.561276	0.750832	0.712893	0.630741	0.554089	0.801393	0.86476	0.750166	0.610467	0.752495	0.782727	0.717096	0.386315	0.845266	0.824126	0.731625	0.590762	0.8293	0.794726	0.725252	0.660389	0.895432	1	0.725252	0.638698	0.813806	0.837024	0.663988	0.710168	0.719393	0.81305	0.762918	0.805617	0.570939	0.598087	0.635317	0.717686	0.690443	0.704873	0.503886
		77G7	0.775555	0.826082	0.927061	0.528765	0.665702	0.562014	0.928344	0.431162	0.855585	0.628247	0.94083	0.57193	0.832928	0.839186	0.964996	0.597356	0.689421	0.679216	0.949383	0.306482	0.908972	0.713008	0.998143	0.607606	0.92545	0.901728	1	0.601317	0.759692	0.725252	1	0.479749	0.923208	0.781509	0.979472	0.7401	0.722423	0.688978	0.995918	0.659356	0.623104	0.66093	0.813226	0.653863	0.364888	0.330357	-0.0287876
		TauAB	0.860928	0.704855	0.761253	0.978911	0.907344	0.505621	0.816258	0.990813	0.665965	0.362512	0.324107	0.951691	0.823416	0.727822	0.625438	0.971871	0.811764	0.648157	0.553375	0.921842	0.61114	0.389283	0.497183	0.95981	0.591081	0.413725	0.479749	0.98454	0.793506	0.638698	0.479749	1	0.594994	0.305898	0.30853	0.931042	0.934157	0.877123	0.470282	0.957826	0.95117	0.922139	0.835245	0.95629	0.322156	0.554857	0.512414
	299-317 4R	Tau12	0.885966	0.866532	0.939137	0.61249	0.803973	0.629177	0.864516	0.528233	0.901525	0.596394	0.766367	0.634368	0.914357	0.890668	0.909322	0.68635	0.851467	0.845293	0.90401	0.394644	0.98844	0.747756	0.92424	0.674855	0.987954	0.916286	0.923208	0.694023	0.882236	0.813806	0.923208	0.594994	1	0.760908	0.862062	0.800791	0.823274	0.800922	0.921051	0.778503	0.689542	0.710775	0.850648	0.753526	0.597882	0.589507	0.176307
		HT7	0.648409	0.848804	0.686198	0.273676	0.516766	0.674316	0.43024	0.201478	0.765393	0.909016	0.696965	0.331609	0.634161	0.800571	0.679748	0.322068	0.516382	0.696074	0.746149	0.12981	0.794534	0.953209	0.763194	0.326971	0.797443	0.921632	0.781509	0.388955	0.61107	0.837024	0.781509	0.305898	0.760908	1	0.793981	0.516591	0.500887	0.676713	0.811459	0.499954	0.323042	0.410959	0.506026	0.409122	0.643826	0.47676	0.294904
		77G7	0.649033	0.740345	0.834795	0.355337	0.516032	0.50304	0.719518	0.255979	0.776985	0.607441	0.962401	0.406216	0.714312	0.743653	0.908929	0.431778	0.552504	0.569342	0.90051	0.120599	0.84169	0.685763	0.972384	0.441852	0.868382	0.878692	0.979472	0.438005	0.651542	0.663988	0.979472	0.30853	0.862062	0.793981	1	0.598074	0.575088	0.554728	0.979442	0.510074	0.459741	0.502834	0.684235	0.495061	0.342909	0.256884	-0.100715
		TauAB	0.959646	0.858388	0.932844	0.953494	0.965446	0.544947	0.925662	0.905928	0.837368	0.523559	0.5741	0.945786	0.951137	0.885494	0.831006	0.971393	0.893964	0.784878	0.796649	0.844476	0.809796	0.581189	0.750802	0.970397	0.794416	0.664481	0.7401	0.977061	0.853729	0.710168	0.7401	0.931042	0.800791	0.516591	0.598074	1	0.986593	0.94184	0.722754	0.959718	0.972164	0.976038	0.967365	0.967697	0.364678	0.531462	0.36165
	354-369	Tau12	0.968899	0.841131	0.927686	0.947787	0.972302	0.621226	0.947218	0.90389	0.859024	0.490559	0.53656	0.950622	0.950541	0.866739	0.810457	0.968548	0.910925	0.794409	0.774689	0.829103	0.829603	0.560537	0.733073	0.96185	0.817844	0.669937	0.722423	0.975959	0.881705	0.719393	0.722423	0.934157	0.823274	0.500887	0.575088	0.986593	1	0.935245	0.707607	0.967568	0.968238	0.960175	0.961929	0.971404	0.41346	0.559804	0.358103
		HT7	0.960622	0.930101	0.876386	0.866462	0.954651	0.645312	0.891235	0.816356	0.855661	0.708508	0.482055	0.870093	0.91825	0.934446	0.743124	0.88002	0.877266	0.880541	0.759533	0.790528	0.830926	0.767137	0.691607	0.876842	0.803495	0.749626	0.688978	0.916263	0.835311	0.81305	0.688978	0.877123	0.800922	0.676713	0.554728	0.94184	0.935245	1	0.687758	0.928685	0.869723	0.905667	0.879314	0.894678	0.56476	0.656994	0.52393
		77G7	0.764156	0.828892	0.915429	0.508215	0.649627	0.584412	0.911078	0.417616	0.842509	0.645228	0.947788	0.551647	0.823373	0.843986	0.963204	0.578991	0.676755	0.679204	0.947933	0.284803	0.909696	0.738936	0.995399	0.588196	0.922872	0.906922	0.995918	0.587578	0.772858	0.762918	0.995918	0.470282	0.921051	0.811459	0.979442	0.722754	0.707607	0.687758	1	0.658996	0.598834	0.63959	0.787577	0.644111	0.387728	0.343336	-0.0102351
		TauAB	0.939676	0.829049	0.876143	0.933209	0.94505	0.57646	0.850812	0.929551	0.778306	0.473011	0.503198	0.906174	0.931093	0.859204	0.778288	0.955758	0.910758	0.78483	0.712172	0.810822	0.793928	0.560879	0.677049	0.940146	0.772109	0.609923	0.659356	0.968454	0.929471	0.805617	0.659356	0.957826	0.778503	0.499954	0.510074	0.959718	0.967568	0.928685	0.658996	1	0.93142	0.91609	0.890029	0.983676	0.457057	0.644853	0.479591
	407-438	Tau12	0.896205	0.740285	0.861232	0.989862	0.933486	0.484016	0.900872	0.951172	0.748231	0.365088	0.460988	0.979919	0.890311	0.781475	0.749346	0.992908	0.852985	0.693699	0.701478	0.913526	0.697236	0.409816	0.640477	0.996846	0.678747	0.512498	0.623104	0.983382	0.789199	0.570939	0.623104	0.95117	0.689542	0.323042	0.459741	0.972164	0.968238	0.869723	0.598834	0.93142	1	0.986292	0.948932	0.969423	0.202472	0.411649	0.272913
		HT7	0.909629	0.800558	0.879645	0.972075	0.941062	0.499562	0.920188	0.913433	0.777311	0.471421	0.490764	0.969968	0.90637	0.841395	0.771468	0.973498	0.856278	0.75296	0.755963	0.912757	0.729141	0.516935	0.676273	0.987199	0.701513	0.583116	0.66093	0.969174	0.775491	0.598087	0.66093	0.922139	0.710775	0.410959	0.502834	0.976038	0.960175	0.905667	0.63959	0.91609	0.986292	1	0.960535	0.953243	0.209835	0.388771	0.253745
		77G7	0.939618	0.838707	0.96147	0.898986	0.932978	0.53587	0.973684	0.816171	0.869541	0.488507	0.643871	0.909372	0.956517	0.878487	0.881871	0.926908	0.892356	0.792219	0.866735	0.771749	0.853184	0.567269	0.823985	0.936483	0.84067	0.720041	0.813226	0.915061	0.827159	0.635317	0.813226	0.835245	0.850648	0.506026	0.684235	0.967365	0.961929	0.879314	0.787577	0.890029	0.948932	0.960535	1	0.926915	0.274648	0.401773	0.14126
		TauAB	0.925126	0.793839	0.879277	0.962958	0.944649	0.513121	0.878566	0.947106	0.75925	0.399032	0.499639	0.933673	0.935094	0.839377	0.7891	0.981038	0.919105	0.768079	0.72439	0.851054	0.770132	0.489591	0.676403	0.97511	0.744019	0.567709	0.653863	0.97581	0.902916	0.717686	0.653863	0.95629	0.753526	0.409122	0.495061	0.967697	0.971404	0.894678	0.644111	0.983676	0.969423	0.953243	0.926915	1	0.314897	0.528149	0.349611
SI	6-23	HT7	0.525517	0.539517	0.405808	0.206201	0.461905	0.51272	0.360116	0.203454	0.509636	0.529523	0.183016	0.21067	0.439046	0.494654	0.290994	0.257498	0.463857	0.579221	0.302248	0.0866473	0.580931	0.62175	0.343389	0.201378	0.586623	0.587589	0.364888	0.328741	0.523311	0.690443	0.364888	0.322156	0.597882	0.643826	0.342909	0.364678	0.41346	0.56476	0.387728	0.457057	0.202472	0.209835	0.274648	0.314897	1	0.913397	0.713609
		77G7	0.622004	0.546212	0.471121	0.438988	0.612906	0.348237	0.447827	0.469828	0.464708	0.371651	0.148397	0.380271	0.558732	0.541742	0.352271	0.486547	0.616542	0.620364	0.310728	0.322812	0.570437	0.501822	0.325809	0.421457	0.556789	0.455714	0.330357	0.531919	0.646288	0.704873	0.330357	0.554857	0.589507	0.47676	0.256884	0.531462	0.559804	0.656994	0.343336	0.644853	0.411649	0.388771	0.401773	0.528149	0.913397	1	0.827484
		TauAB	0.404585	0.363024	0.167967	0.361816	0.43871	0.225306	0.308171	0.443976	0.216287	0.330819	-0.161545	0.295503	0.280855	0.314654	0.012317	0.353877	0.338112	0.347722	-0.00392002	0.369703	0.196509	0.338433	-0.0388264	0.295876	0.182045	0.130227	-0.0287875	0.425449	0.351746	0.503886	-0.0287876	0.512414	0.176307	0.294904	-0.100715	0.36165	0.358103	0.52393	-0.0102351	0.479591	0.272913	0.253745	0.14126	0.349611	0.713609	0.827484	1
	25-44	HT7	0.573817	0.579404	0.433974	0.250646	0.536114	0.373945	0.477926	0.216686	0.524257	0.512111	0.127974	0.228571	0.510687	0.558038	0.304437	0.301639	0.581696	0.715533	0.349279	0.152464	0.625795	0.647143	0.350722	0.254658	0.608578	0.610695	0.367412	0.348927	0.526479	0.629131	0.367412	0.324235	0.62988	0.592078	0.323667	0.407066	0.441691	0.59807	0.3728	0.465666	0.257274	0.282983	0.352644	0.360407	0.939523	0.895305	0.639781
		77G7	0.653718	0.558916	0.421577	0.616968	0.704859	0.301482	0.618235	0.655622	0.430051	0.38488	-0.0569686	0.546617	0.558176	0.546883	0.236039	0.617233	0.641582	0.629933	0.22165	0.605866	0.440727	0.448188	0.162227	0.56936	0.407507	0.311119	0.162774	0.664062	0.572891	0.600769	0.162774	0.717319	0.421586	0.334076	0.0347855	0.616073	0.621697	0.740569	0.164329	0.705785	0.551795	0.539877	0.447372	0.619232	0.729379	0.896463	0.909067
		TauAB	0.470579	0.419556	0.218744	0.394076	0.507655	0.245133	0.393961	0.460529	0.283939	0.355368	-0.15537	0.325216	0.346982	0.376703	0.0497179	0.39074	0.419216	0.438381	0.0592961	0.395859	0.268467	0.392077	0.00280975	0.332825	0.247897	0.193066	0.0128105	0.457195	0.396467	0.524804	0.0128104	0.533115	0.240471	0.327335	-0.0665629	0.40503	0.40688	0.572261	0.026842	0.51259	0.313999	0.300542	0.201599	0.389813	0.739982	0.849784	0.990296
	45-68 0N	HT7	-0.00899996	0.0828719	-0.0777577	-0.331794	-0.117261	0.466192	-0.0537469	-0.313763	0.154034	0.327913	-0.0725378	-0.255372	-0.113876	-0.0233825	-0.155637	-0.305148	-0.0894827	0.0778093	-0.151749	-0.403266	0.150979	0.289346	-0.0278644	-0.347797	0.198618	0.291116	0.00813153	-0.21821	0.042377	0.299741	0.00813139	-0.204444	0.174075	0.402724	0.0697974	-0.201788	-0.115773	0.0238756	0.0413105	-0.0914558	-0.333185	-0.335565	-0.247447	-0.236455	0.762218	0.495676	0.380435
		77G7	0.21761	0.20526	0.0657766	0.0513125	0.17398	0.446562	0.200103	0.0930416	0.245067	0.351311	-0.14306	0.0920484	0.0581551	0.0926776	-0.104612	0.0506491	0.0797309	0.149463	-0.136709	0.021081	0.157447	0.255213	-0.0447555	-0.00511841	0.204518	0.218342	-0.00797686	0.145792	0.145706	0.346346	-0.00797696	0.193495	0.188744	0.326884	-0.0172909	0.112938	0.167372	0.298588	0.00427905	0.198886	0.00669341	-0.0218852	-0.0255163	0.0491868	0.831049	0.725151	0.749541
		TauAB	-0.00907223	0.0463138	-0.224815	-0.0436072	-0.0060629	0.134087	-0.0544791	0.0623106	-0.0715055	0.257234	-0.366161	-0.0659323	-0.163189	-0.0699946	-0.359099	-0.0826798	-0.123918	-0.0623305	-0.370539	0.0238873	-0.184116	0.122385	-0.351993	-0.12835	-0.164958	-0.117875	-0.32569	0.0126205	-0.0698512	0.206315	-0.32569	0.12501	-0.212951	0.148775	-0.326717	-0.0607345	-0.0680798	0.135759	-0.301252	0.0521562	-0.145344	-0.160155	-0.28438	-0.0914475	0.519059	0.512342	0.856667
	68-97 1N	HT7	0.687631	0.673623	0.653199	0.346361	0.631391	0.446511	0.552589	0.282482	0.651209	0.450004	0.435098	0.328094	0.713352	0.721457	0.615796	0.431468	0.755338	0.842853	0.655049	0.170195	0.847927	0.703197	0.639843	0.399785	0.81402	0.767169	0.635436	0.437994	0.753532	0.737528	0.635436	0.366971	0.852756	0.65321	0.58733	0.525908	0.576931	0.631611	0.648997	0.582018	0.401201	0.42908	0.561891	0.528126	0.763255	0.728627	0.28618
		77G7	0.833429	0.723703	0.741864	0.621192	0.82493	0.441317	0.724161	0.584141	0.699568	0.389245	0.369021	0.575688	0.832517	0.774974	0.646881	0.687701	0.890154	0.876603	0.646781	0.464369	0.844671	0.615587	0.611027	0.646855	0.809766	0.678509	0.601406	0.690802	0.852703	0.754839	0.601406	0.651049	0.851322	0.535971	0.496331	0.731666	0.775256	0.78645	0.601372	0.790939	0.647509	0.643586	0.714872	0.746732	0.750069	0.841449	0.478575
		TauAB	0.757536	0.574238	0.552465	0.842185	0.835313	0.333416	0.753073	0.887194	0.494007	0.225168	0.0243036	0.764378	0.701098	0.601588	0.383038	0.837981	0.789798	0.652261	0.331862	0.81223	0.495581	0.315135	0.248428	0.801239	0.455845	0.261632	0.229797	0.850105	0.720592	0.582013	0.229797	0.90515	0.468552	0.181751	0.0559138	0.772691	0.792095	0.782902	0.223317	0.86364	0.786516	0.745052	0.639788	0.837628	0.467992	0.729218	0.711097
	68-87 2N	HT7	0.581846	0.565502	0.470475	0.211861	0.533077	0.368052	0.452662	0.180038	0.540028	0.382317	0.218151	0.173879	0.572258	0.582987	0.399412	0.288535	0.669504	0.763886	0.451423	0.054723	0.716408	0.622991	0.434469	0.240443	0.687381	0.640848	0.436581	0.306462	0.643663	0.665615	0.436581	0.271504	0.70625	0.57186	0.400646	0.377052	0.437454	0.525556	0.449976	0.46937	0.244602	0.258055	0.376717	0.390996	0.834851	0.794202	0.437774
		77G7	0.662398	0.558888	0.513601	0.384497	0.656979	0.318743	0.550531	0.366586	0.540302	0.284217	0.158982	0.321912	0.636502	0.593785	0.409557	0.454336	0.742554	0.766697	0.446779	0.242082	0.696454	0.534092	0.400677	0.395884	0.662688	0.550641	0.398409	0.463989	0.688009	0.640625	0.398409	0.445783	0.695861	0.460814	0.327365	0.501767	0.558425	0.609261	0.402238	0.589382	0.399618	0.389089	0.469734	0.518435	0.824174	0.87362	0.564747
		TauAB	0.685796	0.539211	0.455206	0.61904	0.735281	0.324835	0.645805	0.665532	0.453444	0.25034	-0.0353957	0.535131	0.620467	0.557303	0.291872	0.640212	0.743969	0.686088	0.269884	0.558347	0.523626	0.401174	0.20388	0.583495	0.483354	0.323792	0.193269	0.665262	0.694078	0.637655	0.193269	0.718193	0.502043	0.286189	0.058498	0.61313	0.654215	0.706411	0.199021	0.744951	0.569814	0.534912	0.480325	0.67409	0.716768	0.896915	0.805824
	212-221	HT7	0.404702	0.362343	0.335881	0.0510237	0.357818	0.295828	0.264097	0.0248394	0.3712	0.202841	0.179204	0.0212875	0.409285	0.406486	0.308521	0.141572	0.49317	0.590145	0.350829	-0.1093	0.595383	0.478367	0.348727	0.0861656	0.568727	0.516875	0.348571	0.151639	0.527988	0.549436	0.348571	0.11399	0.617526	0.462523	0.341095	0.209156	0.289051	0.347264	0.372559	0.317503	0.0884614	0.0885297	0.226383	0.233184	0.805746	0.730869	0.333701
		77G7	0.777721	0.633885	0.697463	0.573011	0.779248	0.371236	0.71105	0.515001	0.660517	0.305284	0.315228	0.536317	0.769211	0.687544	0.589226	0.640316	0.828171	0.813662	0.598674	0.425758	0.791523	0.524388	0.568846	0.598238	0.764686	0.631991	0.564793	0.634946	0.748764	0.616025	0.564793	0.580284	0.819818	0.446862	0.466552	0.682528	0.730102	0.717808	0.551126	0.704474	0.609815	0.600697	0.69199	0.671727	0.730632	0.807932	0.413874
		TauAB	0.717715	0.475675	0.556853	0.892853	0.822192	0.23389	0.752142	0.924351	0.431366	0.0534351	0.0389465	0.812337	0.692108	0.541653	0.41218	0.888847	0.771489	0.5801	0.348791	0.871218	0.443999	0.163697	0.251155	0.860881	0.398938	0.16504	0.223278	0.871948	0.683934	0.444092	0.223278	0.913348	0.434038	0.01774	0.0371315	0.784835	0.803747	0.718338	0.206966	0.845536	0.848646	0.795771	0.691062	0.862935	0.269764	0.576108	0.521384
	243-254	HT7	0.129912	0.26829	-0.00290506	-0.209898	0.0468398	0.335058	0.00257433	-0.185247	0.190858	0.495229	-0.0628647	-0.19442	0.024582	0.170842	-0.0910922	-0.184649	0.0602932	0.267852	-0.0518434	-0.257345	0.22316	0.494857	0.0104468	-0.231343	0.238729	0.354488	0.0437716	-0.091318	0.133693	0.455559	0.0437714	-0.0667464	0.215213	0.542633	0.0883152	-0.0572371	-0.0267872	0.217092	0.0781903	0.0488793	-0.236365	-0.206976	-0.168876	-0.1151	0.866593	0.685691	0.662625
		77G7	0.0828793	0.200484	-0.0718725	-0.217169	0.0184887	0.267316	-0.0137279	-0.181555	0.1168	0.428366	-0.158333	-0.212372	-0.0315144	0.104274	-0.172687	-0.199316	0.0194975	0.215735	-0.137991	-0.241714	0.142165	0.419699	-0.0823976	-0.249604	0.155442	0.261041	-0.0495241	-0.107301	0.076879	0.390803	-0.0495243	-0.0687302	0.136794	0.455338	-0.0111909	-0.0905192	-0.0618936	0.181949	-0.0178239	0.0204359	-0.256316	-0.234455	-0.217827	-0.143104	0.847553	0.6917	0.706589
		TauAB	0.0376087	0.134153	-0.142522	-0.221533	-0.0178291	0.200764	-0.0639475	-0.156044	0.0594113	0.344236	-0.22426	-0.233126	-0.090331	0.0195164	-0.249794	-0.214604	-0.029491	0.108308	-0.230984	-0.244129	0.0421143	0.303079	-0.173106	-0.271183	0.0664977	0.141154	-0.139575	-0.123168	0.0269481	0.325827	-0.139575	-0.05787	0.0262285	0.35771	-0.0985846	-0.12339	-0.10228	0.118877	-0.113101	-0.00480638	-0.27447	-0.274875	-0.277765	-0.167096	0.764222	0.648285	0.761617
	275-286 3R	HT7	-0.0199584	0.131682	-0.185227	-0.319057	-0.0875565	0.212471	-0.126909	-0.26113	0.019889	0.383459	-0.216875	-0.325178	-0.123308	0.0313614	-0.259877	-0.306712	-0.0561522	0.143189	-0.217589	-0.332987	0.051389	0.377293	-0.173385	-0.35369	0.0591043	0.177096	-0.144821	-0.215965	0.0201817	0.358164	-0.144821	-0.158629	0.0214789	0.413246	-0.0921186	-0.206676	-0.180226	0.0747276	-0.103798	-0.0675769	-0.366647	-0.343102	-0.340448	-0.228951	0.744804	0.585159	0.664115
		77G7	-0.0402328	0.10864	-0.185337	-0.346878	-0.120646	0.279283	-0.12613	-0.300854	0.0475544	0.398377	-0.199615	-0.323904	-0.159421	-0.00869696	-0.27095	-0.337453	-0.113975	0.0883463	-0.230511	-0.36336	0.0400575	0.353507	-0.163329	-0.382255	0.0646826	0.19486	-0.127481	-0.239885	-0.0295872	0.313019	-0.127481	-0.192758	0.0229929	0.418186	-0.0650464	-0.227071	-0.191549	0.0492826	-0.0905849	-0.109416	-0.385825	-0.365325	-0.346455	-0.272806	0.750471	0.547339	0.617209
		TauAB	-0.0475481	0.11064	-0.211579	-0.308089	-0.111487	0.194197	-0.155857	-0.245693	-0.00143915	0.400376	-0.228547	-0.307841	-0.168552	-0.00790269	-0.295571	-0.309036	-0.125791	0.0624255	-0.257814	-0.302199	-0.0203394	0.339595	-0.208771	-0.35293	-0.00234571	0.127246	-0.175138	-0.210514	-0.0518133	0.306157	-0.175138	-0.146995	-0.0493421	0.390522	-0.118441	-0.206769	-0.196801	0.0645281	-0.138741	-0.0907224	-0.364441	-0.341551	-0.360099	-0.254312	0.694569	0.541335	0.6997
	299-317 4R	HT7	0.459721	0.332614	0.361435	0.212214	0.44642	0.187829	0.276227	0.216304	0.350091	0.130002	0.147596	0.154496	0.418104	0.357406	0.29033	0.291112	0.473162	0.469468	0.281899	0.0557143	0.504134	0.338869	0.299264	0.213952	0.500926	0.382747	0.30738	0.309113	0.496617	0.497197	0.30738	0.29876	0.557935	0.358783	0.285269	0.34002	0.387925	0.421696	0.312333	0.418744	0.221565	0.182724	0.27947	0.314777	0.86072	0.892838	0.620291
		77G7	0.51063	0.369506	0.378058	0.286493	0.504911	0.296085	0.363975	0.299473	0.39515	0.167743	0.0964382	0.239906	0.44578	0.38414	0.2734	0.353527	0.50924	0.500702	0.26636	0.147788	0.513783	0.356567	0.271351	0.276493	0.510053	0.385122	0.27945	0.382069	0.535345	0.536323	0.27945	0.385688	0.557438	0.363992	0.236291	0.388128	0.450154	0.486578	0.2878	0.483667	0.283277	0.240475	0.310042	0.37433	0.88881	0.920562	0.685457
		TauAB	0.515655	0.278189	0.316256	0.525626	0.598247	0.0820643	0.449356	0.583979	0.242511	-0.055867	-0.098602	0.418196	0.455916	0.32893	0.188251	0.55875	0.559681	0.431406	0.151814	0.461804	0.331812	0.126571	0.0844219	0.484565	0.300758	0.086139	0.0730457	0.561516	0.524491	0.408673	0.0730456	0.61729	0.354412	0.0534647	-0.0357959	0.494297	0.529531	0.513887	0.0706529	0.601996	0.475961	0.405851	0.360634	0.537173	0.611989	0.837245	0.773063
	354-369	HT7	-0.0214349	0.127722	-0.189238	-0.300019	-0.0841036	0.218862	-0.112322	-0.24418	0.0165237	0.39779	-0.235645	-0.300228	-0.134897	0.0223431	-0.276293	-0.293959	-0.0748562	0.127725	-0.236394	-0.299457	0.0296765	0.369232	-0.190242	-0.339408	0.0396786	0.164092	-0.15945	-0.198952	-0.00500079	0.339462	-0.15945	-0.140641	0.00419974	0.402973	-0.111188	-0.195252	-0.172115	0.0886203	-0.120657	-0.0655615	-0.352238	-0.327389	-0.336285	-0.228388	0.748463	0.589735	0.686831
		77G7	0.0373888	0.147934	-0.105114	-0.274959	-0.0376344	0.278535	-0.0650674	-0.233409	0.0965718	0.377778	-0.15569	-0.262835	-0.0763954	0.0461626	-0.195814	-0.253151	-0.0263073	0.154617	-0.169803	-0.316247	0.118625	0.366617	-0.0968069	-0.306721	0.141813	0.238096	-0.0627583	-0.162139	0.0540181	0.361514	-0.0627585	-0.122026	0.11814	0.429318	-0.0115772	-0.145844	-0.105909	0.115162	-0.0299551	-0.0270854	-0.308484	-0.297871	-0.263457	-0.192055	0.832344	0.656974	0.66116
		TauAB	-0.0116989	0.126286	-0.184429	-0.274834	-0.0702054	0.193018	-0.122669	-0.210981	0.0154714	0.383083	-0.228294	-0.282959	-0.131277	0.0159847	-0.27327	-0.270692	-0.0785832	0.0993077	-0.238951	-0.277902	0.0121887	0.344163	-0.193586	-0.319666	0.0269584	0.137911	-0.161766	-0.175387	-0.00853255	0.331714	-0.161766	-0.111088	-0.0132601	0.388587	-0.112627	-0.173908	-0.159437	0.0943662	-0.126071	-0.0503313	-0.331257	-0.31383	-0.32923	-0.215091	0.733443	0.596351	0.731083
	407-438	HT7	0.332703	0.157007	0.259798	0.490175	0.345543	0.688123	0.469029	0.535367	0.331942	0.0609794	-0.0307262	0.579882	0.227051	0.116725	0.110996	0.45499	0.212068	0.0669429	0.0166095	0.485967	0.15578	-0.053142	0.0511163	0.441514	0.194163	0.0615778	0.0513426	0.498275	0.326823	0.227943	0.0513427	0.548832	0.175025	-0.0130924	-0.0555893	0.366428	0.470306	0.343767	0.060915	0.446246	0.455387	0.380062	0.307961	0.421535	0.19567	0.202671	0.229582
		77G7	0.8596	0.67195	0.777514	0.918971	0.913737	0.381899	0.82598	0.902796	0.635366	0.267889	0.322508	0.869067	0.858134	0.740412	0.660051	0.942166	0.8846	0.750671	0.59653	0.835211	0.692007	0.398225	0.540621	0.921004	0.654282	0.460722	0.518452	0.930864	0.826951	0.622764	0.518452	0.918376	0.703501	0.28281	0.349444	0.904282	0.919267	0.852854	0.503819	0.931253	0.91333	0.887765	0.853747	0.93848	0.429773	0.666702	0.444405
		TauAB	0.718067	0.480944	0.577726	0.912514	0.816818	0.278057	0.730935	0.948896	0.439327	0.0567087	0.0921069	0.84049	0.699698	0.549739	0.449538	0.907511	0.759528	0.55464	0.375816	0.885357	0.446853	0.159788	0.281431	0.883765	0.403787	0.166736	0.250754	0.891083	0.706077	0.465831	0.250754	0.932976	0.43562	0.0283006	0.065293	0.7982	0.818263	0.718256	0.239907	0.863754	0.869176	0.814633	0.705394	0.884118	0.21938	0.523587	0.478757
			Tau12	HT7	77G7	TauAB	Tau12	HT7	77G7	TauAB	Tau12	HT7	77G7	TauAB	Tau12	HT7	77G7	TauAB	Tau12	HT7	77G7	TauAB	Tau12	HT7	77G7	TauAB	Tau12	HT7	77G7	TauAB	Tau12	HT7	77G7	TauAB	Tau12	HT7	77G7	TauAB	Tau12	HT7	77G7	TauAB	Tau12	HT7	77G7	TauAB	HT7	77G7	TauAB
			6-23				25-44				45-68 0N				68-97 1N				68-87 2N				212-221				243-254				275-286 3R				299-317 4R				354-369				407-438				6-23
			TBS																																												SI
[truncated: 33 more columns]
