# Supplementary material for: Tau protein profiling in tauopathies: a human brain study
Source: Mol Neurodegener. 2024 Jul 19;19:54. doi: 10.1186/s13024-024-00741-9 (PMC11264707; doi:10.1186/s13024-024-00741-9)
Supplement: Supplementary file 2 — Supplementary Material 2: Figure 11 [file 13024_2024_741_MOESM2_ESM.xlsx]

## Sheet: a) Ctrl
a)
			TBS
			175-190 p1				210-224 p1				210-224 p2				210-224 p3				212-224 p1				225-240 p1				225-240 p2				225-240p3				386-406 p1				386-406 p2				386-406 p3				407-438 p1
		Ctrl	Tau12	HT7	77G7	TauAB	Tau12	HT7	77G7	TauAB	Tau12	HT7	77G7	TauAB	Tau12	HT7	77G7	TauAB	Tau12	HT7	77G7	TauAB	Tau12	HT7	77G7	TauAB	Tau12	HT7	77G7	TauAB	Tau12	HT7	77G7	TauAB	Tau12	HT7	77G7	TauAB	Tau12	HT7	77G7	TauAB	Tau12	HT7	77G7	TauAB	Tau12	HT7	77G7
TBS	175-190 p1	Tau12	1	0.824734	0.953397	0.814629	0.469433	0.825347	0.587506	0.55196	0.305443	0.776631	-0.192905	0.238002					0.877018	0.865111	0.902848	-0.116107	0.961526	0.899057	0.929848	0.852139	0.889711	0.922655	0.889445	0.798636	-0.0223675	-0.0980673	0.00556874	-0.397503	0.124637	0.600317	0.290171	0.106008	0.281535	0.466189	0.676612	-0.0838089					0.265061		0.17136
		HT7	0.824734	1	0.717708	0.532282	0.527321	0.682777	0.387399	0.230381	0.129283	0.682992	0.15706	0.31638					0.656968	0.739761	0.682661	0.264082	0.804954	0.934022	0.756212	0.668909	0.640543	0.77357	0.664047	0.73261	0.109025	-0.320131	-0.0226382	-0.324848	0.0103754	0.289128	0.564603	0.146158	0.149692	0.206928	0.390613	0.310613					-0.0267682		0.101513
		77G7	0.953397	0.717708	1	0.915122	0.504468	0.698488	0.460131	0.475985	0.248333	0.704024	-0.361504	0.338594					0.790525	0.737685	0.849671	-0.274532	0.965398	0.867716	0.979428	0.934293	0.847923	0.861054	0.894268	0.845742	-0.239672	-0.113171	0.16449	-0.450469	0.18656	0.741774	0.191978	0.190498	0.242252	0.477051	0.611043	-0.249847					0.492244		0.135837
		TauAB	0.814629	0.532282	0.915122	1	0.579491	0.464636	0.221833	0.349565	0.348594	0.597928	-0.571465	0.301415					0.606139	0.522994	0.683863	-0.531957	0.873939	0.755374	0.881989	0.956084	0.641967	0.626295	0.687182	0.781835	-0.415335	0.00574699	0.147754	-0.465312	0.431793	0.734571	0.0994532	0.256367	0.171863	0.632606	0.450523	-0.517284					0.568486		0.294367
	210-224 p1	Tau12	0.469433	0.527321	0.504468	0.579491	1	0.288533	-0.0545997	-0.0970181	-0.264625	0.197312	-0.0102517	0.210355					0.188106	0.316708	0.285617	0.101789	0.450197	0.515088	0.45377	0.497415	0.194286	0.28481	0.220078	0.344315	0.000239374	-0.125457	-0.0989292	-0.0338164	0.5687	0.374875	0.0462533	0.57418	0.243307	0.614091	-0.0312616	0.0684609					0.433107		0.538966
		HT7	0.825347	0.682777	0.698488	0.464636	0.288533	1	0.736877	0.688489	0.235058	0.748722	0.0888619	0.203161					0.943465	0.991806	0.936095	0.0823271	0.702375	0.673326	0.638104	0.488861	0.892811	0.929605	0.808896	0.554585	0.163724	-0.174061	-0.200432	-0.296564	-0.251961	0.205733	0.320319	-0.253592	0.519651	0.195085	0.677793	0.15958					-0.0734852		0.237936
		77G7	0.587506	0.387399	0.460131	0.221833	-0.0545997	0.736877	1	0.401371	0.174218	0.616583	0.0744215	-0.328108					0.743023	0.687672	0.649106	0.249145	0.488444	0.339899	0.441286	0.266258	0.747651	0.696233	0.681993	0.209024	0.281831	-0.199382	-0.433212	0.247599	-0.115482	0.341793	0.362145	-0.0845898	0.0648375	0.234848	0.826389	0.319217					0.0137785		-0.290336
		TauAB	0.55196	0.230381	0.475985	0.349565	-0.0970181	0.688489	0.401371	1	0.442431	0.347491	-0.218321	0.244553					0.662582	0.691606	0.670666	-0.331144	0.432992	0.33724	0.386153	0.310325	0.594522	0.606448	0.503379	0.396038	0.149534	0.222056	0.0486783	-0.472279	-0.29133	0.0463917	-0.0840563	-0.424225	0.667953	0.0796182	0.358893	-0.322782					-0.154049		0.427474
	210-224 p2	Tau12	0.305443	0.129283	0.248333	0.348594	-0.264625	0.235058	0.174218	0.442431	1	0.602798	-0.62121	-0.130759					0.438701	0.289687	0.379768	-0.60231	0.401767	0.329349	0.291665	0.412172	0.342543	0.285625	0.272752	0.494103	-0.391417	0.416704	0.121498	-0.520508	-0.153607	-0.0822757	0.405925	-0.581032	-0.152479	-0.025987	0.404963	-0.554526					-0.28561		0.14864
		HT7	0.776631	0.682992	0.704024	0.597928	0.197312	0.748722	0.616583	0.347491	0.602798	1	-0.261765	0.0529344					0.884248	0.778525	0.848337	-0.171353	0.819756	0.778284	0.74044	0.705139	0.855577	0.835228	0.818255	0.765306	-0.320369	-0.0720814	-0.0109821	-0.436229	-0.181305	0.291332	0.626551	-0.327992	-0.0426332	0.128218	0.807625	-0.0662697					-0.00538775		-0.0306816
		77G7	-0.192905	0.15706	-0.361504	-0.571465	-0.0102517	0.0888619	0.0744215	-0.218321	-0.62121	-0.261765	1	0.099479					-0.130555	0.0645278	-0.150705	0.769912	-0.370593	-0.174632	-0.395828	-0.550441	-0.186002	-0.0927121	-0.239675	-0.474491	0.688169	-0.494073	-0.463052	0.365543	-0.204736	-0.402093	-0.0218059	0.0705429	0.254952	-0.179937	-0.204736	0.813881					-0.470184		-0.115406
		TauAB	0.238002	0.31638	0.338594	0.301415	0.210355	0.203161	-0.328108	0.244553	-0.130759	0.0529344	0.099479	1					0.179943	0.256218	0.325114	-0.262744	0.249148	0.398376	0.30267	0.317928	0.16354	0.272796	0.227309	0.442888	-0.301734	-0.475257	0.308062	-0.667725	-0.263924	-0.0101567	-0.0347698	-0.126381	0.588871	-0.182343	-0.263924	-0.183017					0.00707636		0.278568
	210-224 p3	Tau12
		HT7
		77G7
		TauAB
	212-224 p1	Tau12	0.877018	0.656968	0.790525	0.606139	0.188106	0.943465	0.743023	0.662582	0.438701	0.884248	-0.130555	0.179943					1	0.95209	0.984067	-0.145637	0.815812	0.731473	0.754396	0.646825	0.970472	0.956581	0.905765	0.685664	-0.0751248	-0.104956	-0.0878828	-0.422844	-0.224308	0.345212	0.35737	-0.311345	0.340583	0.215342	0.82297	-0.0542458					0.0236666		0.104599
		HT7	0.865111	0.739761	0.737685	0.522994	0.316708	0.991806	0.687672	0.691606	0.289687	0.778525	0.0645278	0.256218					0.95209	1	0.952424	0.0316753	0.753298	0.741069	0.682142	0.554024	0.89275	0.938911	0.813395	0.6188	0.133089	-0.172794	-0.177559	-0.371799	-0.217528	0.213329	0.345299	-0.246251	0.516397	0.220498	0.659891	0.111374					-0.0906708		0.272236
		77G7	0.902848	0.682661	0.849671	0.683863	0.285617	0.936095	0.649106	0.670666	0.379768	0.848337	-0.150705	0.325114					0.984067	0.952424	1	-0.201155	0.84765	0.778567	0.802989	0.709958	0.960685	0.963504	0.913554	0.742094	-0.132554	-0.152756	-0.0273191	-0.500882	-0.18828	0.384945	0.305285	-0.256332	0.429208	0.24381	0.7425	-0.111388					0.096815		0.187073
		TauAB	-0.116107	0.264082	-0.274532	-0.531957	0.101789	0.0823271	0.249145	-0.331144	-0.60231	-0.171353	0.769912	-0.262744					-0.145637	0.0316753	-0.201155	1	-0.226509	-0.0676048	-0.230844	-0.428178	-0.126841	-0.0136789	-0.125063	-0.34305	0.687506	-0.327878	-0.313937	0.603357	-0.127569	-0.214444	0.234254	0.287795	-0.105937	-0.188053	-0.092481	0.97593					-0.2486		-0.28806
	225-240 p1	Tau12	0.961526	0.804954	0.965398	0.873939	0.450197	0.702375	0.488444	0.432992	0.401767	0.819756	-0.370593	0.249148					0.815812	0.753298	0.84765	-0.226509	1	0.937954	0.982588	0.94768	0.851163	0.876698	0.88955	0.907326	-0.250219	-0.0793394	0.158019	-0.472798	0.127219	0.644404	0.393445	0.100692	0.0981069	0.394655	0.654001	-0.191501					0.344679		0.0833261
		HT7	0.899057	0.934022	0.867716	0.755374	0.515088	0.673326	0.339899	0.33724	0.329349	0.778284	-0.174632	0.398376					0.731473	0.741069	0.778567	-0.0676048	0.937954	1	0.905518	0.874384	0.731834	0.828028	0.774921	0.916039	-0.184843	-0.216862	0.150266	-0.525031	0.0369972	0.430152	0.533911	0.0751369	0.140904	0.249114	0.457203	-0.0173866					0.141253		0.151199
		77G7	0.929848	0.756212	0.979428	0.881989	0.45377	0.638104	0.441286	0.386153	0.291665	0.74044	-0.395828	0.30267					0.754396	0.682142	0.802989	-0.230844	0.982588	0.905518	1	0.953926	0.827681	0.849734	0.898673	0.902822	-0.303385	-0.112844	0.254013	-0.458548	0.134057	0.733024	0.315036	0.181598	0.0830037	0.372284	0.612677	-0.207753					0.477415		0.0149004
		TauAB	0.852139	0.668909	0.934293	0.956084	0.497415	0.488861	0.266258	0.310325	0.412172	0.705139	-0.550441	0.317928					0.646825	0.554024	0.709958	-0.428178	0.94768	0.874384	0.953926	1	0.693961	0.706698	0.765372	0.907278	-0.452081	-0.0598543	0.247216	-0.517682	0.277038	0.697425	0.316314	0.19016	0.0362457	0.452036	0.492685	-0.400923					0.48193		0.132833
	225-240 p2	Tau12	0.889711	0.640543	0.847923	0.641967	0.194286	0.892811	0.747651	0.594522	0.342543	0.855577	-0.186002	0.16354					0.970472	0.89275	0.960685	-0.126841	0.851163	0.731834	0.827681	0.693961	1	0.970458	0.975648	0.715848	-0.138716	-0.0873808	0.0509057	-0.394486	-0.203301	0.511286	0.289761	-0.199334	0.23763	0.209148	0.867521	-0.0584602					0.216579		-0.0344729
		HT7	0.922655	0.77357	0.861054	0.626295	0.28481	0.929605	0.696233	0.606448	0.285625	0.835228	-0.0927121	0.272796					0.956581	0.938911	0.963504	-0.0136789	0.876698	0.828028	0.849734	0.706698	0.970458	1	0.956408	0.771932	-0.0573815	-0.176955	0.0539549	-0.421546	-0.230386	0.4342	0.381781	-0.159387	0.317403	0.163276	0.749167	0.0533182					0.133505		0.0452194
		77G7	0.889445	0.664047	0.894268	0.687182	0.220078	0.808896	0.681993	0.503379	0.272752	0.818255	-0.239675	0.227309					0.905765	0.813395	0.913554	-0.125063	0.88955	0.774921	0.898673	0.765372	0.975648	0.956408	1	0.783074	-0.227587	-0.143178	0.177773	-0.405679	-0.174629	0.619284	0.30133	-0.0875148	0.150996	0.180624	0.819453	-0.0670392					0.34628		-0.134553
		TauAB	0.798636	0.73261	0.845742	0.781835	0.344315	0.554585	0.209024	0.396038	0.494103	0.765306	-0.474491	0.442888					0.685664	0.6188	0.742094	-0.34305	0.907326	0.916039	0.902822	0.907278	0.715848	0.771932	0.783074	1	-0.491034	-0.0406361	0.442382	-0.71501	-0.107051	0.434046	0.467155	-0.107765	0.0605271	0.0716353	0.445465	-0.302456					0.239342		0.114968
	225-240p3	Tau12	-0.0223675	0.109025	-0.239672	-0.415335	0.000239374	0.163724	0.281831	0.149534	-0.391417	-0.320369	0.688169	-0.301734					-0.0751248	0.133089	-0.132554	0.687506	-0.250219	-0.184843	-0.303385	-0.452081	-0.138716	-0.0573815	-0.227587	-0.491034	1	-0.0584805	-0.557601	0.551531	0.113666	-0.223235	-0.152499	0.257036	0.293954	0.180319	-0.113666	0.630262					-0.380004		0.100251
		HT7	-0.0980673	-0.320131	-0.113171	0.00574699	-0.125457	-0.174061	-0.199382	0.222056	0.416704	-0.0720814	-0.494073	-0.475257					-0.104956	-0.172794	-0.152756	-0.327878	-0.0793394	-0.216862	-0.112844	-0.0598543	-0.0873808	-0.176955	-0.143178	-0.0406361	-0.0584805	1	0.407967	-0.173371	0.0857493	-0.018712	-0.383482	-0.168053	-0.229972	0.0479601	0.0857493	-0.480245					0.0889613		0.263285
		77G7	0.00556874	-0.0226382	0.16449	0.147754	-0.0989292	-0.200432	-0.433212	0.0486783	0.121498	-0.0109821	-0.463052	0.308062					-0.0878828	-0.177559	-0.0273191	-0.313937	0.158019	0.150266	0.254013	0.247216	0.0509057	0.0539549	0.177773	0.442382	-0.557601	0.407967	1	-0.601168	-0.322116	0.178422	-0.166224	-0.134517	-0.227851	-0.445965	-0.074259	-0.403008					0.350356		-0.11388
		TauAB	-0.397503	-0.324848	-0.450469	-0.465312	-0.0338164	-0.296564	0.247599	-0.472279	-0.520508	-0.436229	0.365543	-0.667725					-0.422844	-0.371799	-0.500882	0.603357	-0.472798	-0.525031	-0.458548	-0.517682	-0.394486	-0.421546	-0.405679	-0.71501	0.551531	-0.173371	-0.601168	1	0.367607	7.24276e-06	-0.0547963	0.498755	-0.281704	0.224301	-0.122506	0.563402					0.0555394		-0.325615
	386-406 p1	Tau12	0.124637	0.0103754	0.18656	0.431793	0.5687	-0.251961	-0.115482	-0.29133	-0.153607	-0.181305	-0.204736	-0.263924					-0.224308	-0.217528	-0.18828	-0.127569	0.127219	0.0369972	0.134057	0.277038	-0.203301	-0.230386	-0.174629	-0.107051	0.113666	0.0857493	-0.322116	0.367607	1	0.509175	-0.248452	0.80403	-0.12771	0.881331	-0.111111	-0.204803					0.499074		0.242055
		HT7	0.600317	0.289128	0.741774	0.734571	0.374875	0.205733	0.341793	0.0463917	-0.0822757	0.291332	-0.402093	-0.0101567					0.345212	0.213329	0.384945	-0.214444	0.644404	0.430152	0.733024	0.697425	0.511286	0.4342	0.619284	0.434046	-0.223235	-0.018712	0.178422	7.24276e-06	0.509175	1	-0.16265	0.592157	-0.14631	0.610253	0.509175	-0.258573					0.869506		-0.235911
		77G7	0.290171	0.564603	0.191978	0.0994532	0.0462533	0.320319	0.362145	-0.0840563	0.405925	0.626551	-0.0218059	-0.0347698					0.35737	0.345299	0.305285	0.234254	0.393445	0.533911	0.315036	0.316314	0.289761	0.381781	0.30133	0.467155	-0.152499	-0.383482	-0.166224	-0.0547963	-0.248452	-0.16265	1	-0.224733	-0.285569	-0.22739	0.248452	0.349756					-0.364074		-0.202944
		TauAB	0.106008	0.146158	0.190498	0.256367	0.57418	-0.253592	-0.0845898	-0.424225	-0.581032	-0.327992	0.0705429	-0.126381					-0.311345	-0.246251	-0.256332	0.287795	0.100692	0.0751369	0.181598	0.19016	-0.199334	-0.159387	-0.0875148	-0.107765	0.257036	-0.168053	-0.134517	0.498755	0.80403	0.592157	-0.224733	1	-0.158838	0.628556	-0.201008	0.186778					0.617572		-0.0535056
	386-406 p2	Tau12	0.281535	0.149692	0.242252	0.171863	0.243307	0.519651	0.0648375	0.667953	-0.152479	-0.0426332	0.254952	0.588871					0.340583	0.516397	0.429208	-0.105937	0.0981069	0.140904	0.0830037	0.0362457	0.23763	0.317403	0.150996	0.0605271	0.293954	-0.229972	-0.227851	-0.281704	-0.12771	-0.14631	-0.285569	-0.158838	1	0.160715	-0.12771	-0.0640233					-0.167189		0.661501
		HT7	0.466189	0.206928	0.477051	0.632606	0.614091	0.195085	0.234848	0.0796182	-0.025987	0.128218	-0.179937	-0.182343					0.215342	0.220498	0.24381	-0.188053	0.394655	0.249114	0.372284	0.452036	0.209148	0.163276	0.180624	0.0716353	0.180319	0.0479601	-0.445965	0.224301	0.881331	0.610253	-0.22739	0.628556	0.160715	1	0.237281	-0.224518					0.472756		0.352915
		77G7	0.676612	0.390613	0.611043	0.450523	-0.0312616	0.677793	0.826389	0.358893	0.404963	0.807625	-0.204736	-0.263924					0.82297	0.659891	0.7425	-0.092481	0.654001	0.457203	0.612677	0.492685	0.867521	0.749167	0.819453	0.445465	-0.113666	0.0857493	-0.074259	-0.122506	-0.111111	0.509175	0.248452	-0.201008	-0.12771	0.237281	1	-0.0360093					0.206591		-0.301208
		TauAB	-0.0838089	0.310613	-0.249847	-0.517284	0.0684609	0.15958	0.319217	-0.322782	-0.554526	-0.0662697	0.813881	-0.183017					-0.0542458	0.111374	-0.111388	0.97593	-0.191501	-0.0173866	-0.207753	-0.400923	-0.0584602	0.0533182	-0.0670392	-0.302456	0.630262	-0.480245	-0.403008	0.563402	-0.204803	-0.258573	0.349756	0.186778	-0.0640233	-0.224518	-0.0360093	1					-0.330039		-0.321667
	386-406 p3	Tau12
		HT7
		77G7
		TauAB
	407-438 p1	Tau12	0.265061	-0.0267682	0.492244	0.568486	0.433107	-0.0734852	0.0137785	-0.154049	-0.28561	-0.00538775	-0.470184	0.00707636					0.0236666	-0.0906708	0.096815	-0.2486	0.344679	0.141253	0.477415	0.48193	0.216579	0.133505	0.34628	0.239342	-0.380004	0.0889613	0.350356	0.0555394	0.499074	0.869506	-0.364074	0.617572	-0.167189	0.472756	0.206591	-0.330039					1		-0.129538
		HT7
		77G7	0.17136	0.101513	0.135837	0.294367	0.538966	0.237936	-0.290336	0.427474	0.14864	-0.0306816	-0.115406	0.278568					0.104599	0.272236	0.187073	-0.28806	0.0833261	0.151199	0.0149004	0.132833	-0.0344729	0.0452194	-0.134553	0.114968	0.100251	0.263285	-0.11388	-0.325615	0.242055	-0.235911	-0.202944	-0.0535056	0.661501	0.352915	-0.301208	-0.321667					-0.129538		1
		TauAB	-0.262548	-0.413606	-0.145117	0.13226	0.479828	-0.363383	-0.273815	-0.414717	-0.209133	-0.271921	-0.307063	-0.395834					-0.368286	-0.391876	-0.343349	-0.165589	-0.226968	-0.346424	-0.20144	-0.0617394	-0.331475	-0.42047	-0.338747	-0.318173	-0.175407	0.346052	-0.106147	0.364912	0.65453	0.210301	-0.372629	0.441309	-0.19154	0.509524	-0.166645	-0.25152					0.523149		0.306716
	407-438 p2	Tau12
		HT7
		77G7
		TauAB
	407-438 p3	Tau12
		HT7
		77G7
		TauAB
SI	175-190 p1	HT7	0.762877	0.920967	0.62246	0.370221	0.247338	0.77059	0.560295	0.314202	0.17406	0.737493	0.290043	0.336169					0.753423	0.80988	0.748854	0.286297	0.715852	0.835417	0.654171	0.526983	0.710453	0.81858	0.702451	0.639653	0.141424	-0.483504	-0.159267	-0.300472	-0.241812	0.149115	0.636951	-0.103677	0.21383	0.0302221	0.497952	0.394257					-0.228016		-0.0638011
		77G7	0.950184	0.762994	0.973381	0.846349	0.404821	0.75024	0.534813	0.451974	0.32726	0.825958	-0.3286	0.315544					0.860392	0.785878	0.897307	-0.222729	0.979603	0.901195	0.980411	0.914991	0.912266	0.922538	0.952893	0.89147	-0.294154	-0.150796	0.183015	-0.486538	0.0187599	0.660785	0.346676	0.0402769	0.154468	0.324034	0.703386	-0.170843					0.385455		0.0200744
		TauAB	0.760985	0.482012	0.906439	0.938793	0.331776	0.395667	0.290844	0.302353	0.446803	0.650148	-0.667921	0.347589					0.60633	0.449514	0.676964	-0.593425	0.877465	0.758289	0.914569	0.962402	0.678183	0.645263	0.765137	0.855439	-0.610502	-0.144368	0.265808	-0.524114	0.188587	0.728903	0.268974	0.0840912	0.00915829	0.362892	0.507462	-0.530391					0.548786		-0.0326333
	210-224 p1	HT7	0.273097	0.401707	0.116688	-0.229551	-0.0312535	0.401503	0.493701	0.214586	-0.225128	0.114416	0.370317	-0.278894					0.247447	0.353759	0.17871	0.733686	0.166066	0.197546	0.166311	-0.0941079	0.312502	0.394432	0.315094	0.0565696	0.59664	0.0718774	0.0630523	0.251682	-0.303388	0.0508476	0.171736	0.0924177	-0.0370231	-0.199916	0.284795	0.657794					-0.0975695		-0.256987
		77G7	0.309328	0.439954	0.319186	0.0744155	0.14126	0.33315	0.474867	-0.270607	-0.467135	0.310837	0.457846	0.199846					0.322915	0.304321	0.325507	0.480055	0.291481	0.320546	0.351932	0.177142	0.421167	0.434863	0.496425	0.15951	0.0256073	-0.735099	-0.154288	0.196627	-0.146588	0.378197	0.289927	0.234889	-0.0761189	-0.0327714	0.39186	0.579638					0.231373		-0.586777
		TauAB	0.789014	0.574951	0.738414	0.626866	0.241525	0.891687	0.567427	0.72484	0.530629	0.799393	-0.263337	0.365261					0.919179	0.913042	0.952776	-0.339941	0.73967	0.708646	0.674301	0.632728	0.846193	0.867565	0.773263	0.707739	-0.222753	-0.171477	-0.107525	-0.556897	-0.268084	0.150705	0.405582	-0.45013	0.519242	0.142045	0.579635	-0.219947					-0.0727172		0.349535
	210-224 p2	HT7	-0.26609	-0.287207	-0.137888	-0.0392345	0.24003	-0.147644	-0.290054	-0.257283	-0.0570929	-0.000743292	-0.3377	-0.0885992					-0.154613	-0.195475	-0.126604	-0.113487	-0.158211	-0.182159	-0.114021	-0.0706965	-0.0941979	-0.137093	-0.0754958	0.0266068	-0.525979	0.334521	0.425169	-0.0963317	-0.154752	-0.091503	-0.0558161	-0.155779	-0.192209	-0.247857	-0.0798724	-0.155433					0.315292		0.163543
		77G7	0.443512	0.238489	0.414194	0.311478	-0.144757	0.607523	0.300905	0.837433	0.351903	0.320946	-0.0893212	0.571269					0.592433	0.624134	0.636835	-0.368037	0.36396	0.352709	0.333008	0.301558	0.493795	0.539152	0.435067	0.402215	-0.0162671	-0.257827	-0.0780544	-0.508806	-0.381818	-0.0729089	0.10672	-0.474884	0.749718	-0.0546003	0.175001	-0.264722					-0.268449		0.330205
		TauAB	0.220963	0.541556	0.177292	0.239993	0.421	0.252823	-0.134493	0.0193739	0.386641	0.447129	-0.0729168	0.425267					0.233063	0.317573	0.283658	-0.0871756	0.312201	0.564944	0.227013	0.346667	0.0940862	0.239503	0.0818469	0.519738	-0.309923	-0.336352	-0.0705471	-0.442438	-0.159941	-0.376348	0.755487	-0.293561	0.144945	-0.156484	-0.159941	0.0263273					-0.410434		0.409521
	210-224 p3	HT7
		77G7
		TauAB	0.151035	0.204176	0.00772415	-0.15465	0.221394	0.514239	0.22503	0.489838	-0.329514	-0.125557	0.590031	0.348755					0.236389	0.489323	0.277288	0.333787	-0.0888241	0.0232219	-0.131841	-0.242262	0.111116	0.233853	0.0011084	-0.192487	0.626818	-0.381599	-0.529377	0.0963912	-0.173949	-0.347897	-0.0945982	-0.0945982	0.883907	0.0699866	-0.173949	0.378484					-0.410599		0.519736
	212-224 p1	HT7	0.38184	0.36798	0.256621	0.12266	-0.234376	0.566059	0.657205	0.434889	0.556744	0.619874	-0.0960745	-0.0481227					0.594134	0.562778	0.522456	0.0147719	0.385558	0.393136	0.293685	0.254316	0.487905	0.523361	0.425886	0.367957	0.0156162	-0.31078	-0.348765	-0.0650456	-0.366384	-0.156266	0.769606	-0.461961	0.0973043	-0.140459	0.431613	0.148557					-0.446144		-0.0943211
		77G7	0.660258	0.640962	0.579234	0.403374	0.282489	0.779546	0.638023	0.227821	0.326189	0.912191	-0.054177	0.00799539					0.823942	0.770411	0.786546	0.101422	0.670047	0.658274	0.609856	0.506773	0.8173	0.811176	0.774722	0.61465	-0.224012	-0.127208	-0.0247955	-0.275125	-0.303337	0.197407	0.589984	-0.309285	-0.0121179	0.00369774	0.764626	0.196584					0.0160033		-0.0526609
		TauAB	0.0270201	0.390122	0.0226035	0.133673	0.091922	-0.0724284	-0.320716	-0.253447	0.433349	0.374941	-0.0843766	0.401964					0.0353081	0.0148908	0.0654474	-0.195539	0.192999	0.436614	0.125764	0.284022	-0.0659655	0.0223517	-0.0364472	0.449794	-0.488795	-0.31046	0.0966226	-0.506509	-0.169974	-0.339947	0.690775	-0.311957	-0.195759	-0.288494	-0.169974	-0.074572					-0.401216		0.0590185
	225-240 p1	HT7	0.863274	0.907408	0.830119	0.648407	0.339759	0.673054	0.481006	0.254148	0.289933	0.830152	-0.106499	0.319689					0.76137	0.723004	0.77874	0.0333523	0.913635	0.95216	0.895653	0.812572	0.796086	0.863153	0.853496	0.878011	-0.205732	-0.303239	0.16133	-0.440895	-0.104375	0.468302	0.600461	0.0193541	-0.00992012	0.114081	0.598651	0.104413					0.146489		-0.137129
		77G7	0.93479	0.823336	0.943531	0.806722	0.370398	0.687477	0.476801	0.39574	0.354888	0.817127	-0.306407	0.312204					0.805925	0.7367	0.837489	-0.16975	0.983493	0.942375	0.980127	0.916717	0.859735	0.891743	0.916612	0.924316	-0.276206	-0.140615	0.243286	-0.509849	0.00264607	0.625109	0.418832	0.0565037	0.0587104	0.257547	0.654725	-0.126686					0.323		-0.0370695
		TauAB	0.782576	0.62685	0.887911	0.856052	0.2415	0.427555	0.303487	0.304584	0.511464	0.720227	-0.60986	0.361977					0.630247	0.490002	0.686374	-0.47127	0.916425	0.862315	0.941145	0.959661	0.697635	0.705213	0.795854	0.949797	-0.579694	-0.161279	0.353926	-0.588431	0.0295376	0.623889	0.454343	-0.00278704	-0.0700656	0.180054	0.50408	-0.406249					0.398166		-0.116767
	225-240 p2	HT7	0.705524	0.817374	0.636558	0.508659	0.161911	0.589576	0.348699	0.242656	0.543547	0.878962	-0.144148	0.308164					0.711222	0.65549	0.706596	-0.0846994	0.788198	0.877769	0.723124	0.699344	0.681236	0.744636	0.699704	0.855785	-0.321014	-0.21012	0.170846	-0.586267	-0.276881	0.157092	0.734698	-0.292192	-0.0755831	-0.0902415	0.526075	0.0176188					-0.151618		-0.0760762
		77G7	0.58551	0.661596	0.609076	0.52223	0.16276	0.391398	0.0160743	0.185215	0.435742	0.701008	-0.251102	0.496623					0.544376	0.464789	0.586707	-0.261338	0.704876	0.784888	0.694761	0.687166	0.574339	0.618354	0.637354	0.876017	-0.537424	-0.030763	0.560934	-0.813102	-0.321642	0.221359	0.420463	-0.283476	-0.0841296	-0.205938	0.37937	-0.205469					0.0554376		-0.0476917
		TauAB	0.287925	0.593018	0.260402	0.263612	0.300107	0.293059	-0.13286	0.142776	0.42684	0.466954	-0.135727	0.528799					0.286898	0.361027	0.346164	-0.118897	0.392293	0.644054	0.328985	0.411972	0.17721	0.336799	0.192556	0.650841	-0.351962	-0.300374	0.138651	-0.589562	-0.304722	-0.332937	0.749566	-0.357307	0.162068	-0.290991	-0.135432	-0.0175849					-0.386704		0.340558
	225-240p3	HT7	0.0773078	0.430059	0.03496	0.114961	0.148859	0.0185067	-0.304413	-0.204553	0.409947	0.405648	-1.1939e-05	0.382022					0.0893449	0.104132	0.115417	-0.117805	0.205466	0.448622	0.123962	0.257901	-0.0231012	0.0776783	-0.0168184	0.441996	-0.399632	-0.238667	0.0871046	-0.506188	-0.195317	-0.383595	0.655125	-0.331264	-0.133304	-0.276334	-0.146483	-0.00964992					-0.446704		0.15243
		77G7	-0.413374	-0.208174	-0.415991	-0.334502	-0.464573	-0.438423	-0.461461	-0.377095	0.160611	-0.082391	0.192573	0.202701					-0.291907	-0.383804	-0.307448	-0.198227	-0.333411	-0.218586	-0.358745	-0.269086	-0.331438	-0.377347	-0.33115	-0.148409	-0.303401	-0.0499448	0.169608	-0.321105	-0.285798	-0.38479	-0.012066	-0.395089	-0.305251	-0.438418	-0.177951	-0.125117					-0.394829		-0.293701
		TauAB	0.0972247	0.539728	-0.0899338	-0.255877	0.318791	0.378885	0.111434	0.101787	-0.160174	0.0862002	0.582624	0.244917					0.12606	0.384787	0.136118	0.597341	-0.00473957	0.289536	-0.0843725	-0.15612	-0.0133096	0.198142	-0.0689711	0.0410896	0.469211	-0.47504	-0.404369	0.0872097	-0.272497	-0.557864	0.554261	-0.110262	0.403411	-0.219964	-0.272497	0.658032					-0.634346		0.330973
	386-406 p1	HT7	-0.262838	-0.384827	-0.0273917	-0.00440043	0.0850803	-0.258344	-0.327412	-0.194114	-0.377035	-0.271957	-0.307104	0.186307					-0.253156	-0.315218	-0.17597	-0.15094	-0.164114	-0.246336	-0.0165362	-0.041014	-0.0910781	-0.138314	0.0191371	0.0077724	-0.511496	0.128624	0.631741	-0.0919045	-0.166667	0.218218	-0.372678	0.0753778	-0.071837	-0.279653	-0.166667	-0.214368					0.619022		-0.0998877
		77G7	0.676612	0.390613	0.611043	0.450523	-0.0312616	0.677793	0.826389	0.358893	0.404963	0.807625	-0.204736	-0.263924					0.82297	0.659891	0.7425	-0.092481	0.654001	0.457203	0.612677	0.492685	0.867521	0.749167	0.819453	0.445465	-0.113666	0.0857493	-0.074259	-0.122506	-0.111111	0.509175	0.248452	-0.201008	-0.12771	0.237281	1	-0.0360093					0.206591		-0.301208
		TauAB
	386-406 p2	HT7	0.713193	0.586942	0.610452	0.502071	0.183237	0.842189	0.505269	0.568559	0.432916	0.80112	0.0448242	0.378044					0.889435	0.874835	0.895074	-0.233757	0.637662	0.638132	0.545998	0.506353	0.787436	0.784683	0.685961	0.562969	-0.111162	-0.226423	-0.215609	-0.539247	-0.249926	0.0782507	0.315873	-0.452133	0.477731	0.167411	0.619382	-0.0936529					-0.212693		0.265683
		77G7	-0.373351	-0.293056	-0.429318	-0.374482	-0.523846	-0.422661	-0.430724	-0.122888	0.143851	-0.266813	0.205077	0.0148188					-0.319988	-0.373606	-0.354226	-0.174066	-0.38276	-0.336907	-0.41552	-0.370765	-0.350906	-0.411286	-0.386759	-0.294296	0.0393586	0.311767	0.190985	-0.254565	-0.163514	-0.321136	-0.365629	-0.295809	-0.187942	-0.274364	-0.163514	-0.192292					-0.375518		-0.157563
		TauAB	0.51546	0.391931	0.361557	0.1939	0.141693	0.802676	0.439525	0.827161	0.1563	0.299804	0.233874	0.362157					0.6405	0.804221	0.670295	-0.00729197	0.305873	0.342737	0.226732	0.129168	0.506785	0.588899	0.373467	0.209161	0.390778	-0.17939	-0.380386	-0.27623	-0.265625	-0.1875	0.0501847	-0.358462	0.881774	0.127779	0.203125	0.0621688					-0.388711		0.570225
	386-406 p3	HT7
		77G7
		TauAB	0.241086	0.104916	0.166152	0.110015	0.214278	0.524455	0.11635	0.674111	-0.0739309	-0.0374846	0.267284	0.503883					0.335766	0.52279	0.409594	-0.105661	0.0364838	0.0806692	-0.00570945	-0.0362971	0.199966	0.276566	0.0827881	-0.0191542	0.343122	-0.228315	-0.380412	-0.220991	-0.125	-0.25	-0.229416	-0.229416	0.989747	0.169729	-0.125	-0.0491677					-0.295058		0.704162
	407-438 p1	HT7
		77G7
		TauAB	0.685545	0.383665	0.613122	0.439745	-0.123859	0.674926	0.870697	0.367051	0.4468	0.805741	-0.233855	-0.305923					0.821952	0.658593	0.743346	-0.108204	0.655311	0.45191	0.612148	0.483269	0.871584	0.752594	0.822365	0.434455	-0.114374	0.0652328	-0.11697	-0.0883563	-0.125	0.5	0.28677	-0.229416	-0.143963	0.221804	1	-0.0434945					0.18549		-0.353162
	407-438 p2	HT7
		77G7
		TauAB	-0.18274	0.238587	-0.347362	-0.59709	0.037833	0.0291056	0.261377	-0.35582	-0.594662	-0.206121	0.768368	-0.305923					-0.194677	-0.0244859	-0.262935	0.999121	-0.284261	-0.123909	-0.290385	-0.476882	-0.184103	-0.0704167	-0.179375	-0.400185	0.686244	-0.375089	-0.380412	0.70709	-0.125	-0.25	0.28677	0.28677	-0.143963	-0.212161	-0.125	0.977681					-0.295058		-0.353162
	407-438 p3	HT7
		77G7
		TauAB
			Tau12	HT7	77G7	TauAB	Tau12	HT7	77G7	TauAB	Tau12	HT7	77G7	TauAB	Tau12	HT7	77G7	TauAB	Tau12	HT7	77G7	TauAB	Tau12	HT7	77G7	TauAB	Tau12	HT7	77G7	TauAB	Tau12	HT7	77G7	TauAB	Tau12	HT7	77G7	TauAB	Tau12	HT7	77G7	TauAB	Tau12	HT7	77G7	TauAB	Tau12	HT7	77G7
			175-190 p1				210-224 p1				210-224 p2				210-224 p3				212-224 p1				225-240 p1				225-240 p2				225-240p3				386-406 p1				386-406 p2				386-406 p3				407-438 p1
			TBS
[truncated: 51 more columns]

## Sheet: b) AD
b)
			TBS
			175-190 p1				210-224 p1				210-224 p2				210-224 p3				212-224 p1				225-240 p1				225-240 p2				225-240p3				386-406 p1				386-406 p2				386-406 p3				407-438 p1
		AD	Tau12	HT7	77G7	TauAB	Tau12	HT7	77G7	TauAB	Tau12	HT7	77G7	TauAB	Tau12	HT7	77G7	TauAB	Tau12	HT7	77G7	TauAB	Tau12	HT7	77G7	TauAB	Tau12	HT7	77G7	TauAB	Tau12	HT7	77G7	TauAB	Tau12	HT7	77G7	TauAB	Tau12	HT7	77G7	TauAB	Tau12	HT7	77G7	TauAB	Tau12	HT7	77G7
TBS	175-190 p1	Tau12	1	0.588379	0.866695	0.618359	0.339924	0.218827	-0.506694	0.262936	0.304738	0.208868	0.176848	0.363348	0.228342	-0.0894207	0.215793	0.352624	0.386626	0.280621	0.32519	0.383531	0.863998	0.934756	0.744927	0.52337	0.510505	0.599366	0.320732	0.458641	0.41977	0.560814	0.050733	0.429882	0.558273	0.114571	0.102631	0.224378	0.454429	0.431627	-0.127487	0.341839					0.559028	0.0744725	0.514127
		HT7	0.588379	1	0.462661	0.189978	0.207871	0.676693	-0.626873	0.181904	0.179498	0.562028	0.126469	0.15102	0.330322	0.488012	0.281999	0.175412	0.222352	0.556497	0.270006	0.162885	0.254266	0.413667	0.320667	0.158305	0.206135	0.376506	0.26119	0.172305	0.202493	0.362022	0.0588297	0.215545	0.157733	0.235105	0.178993	0.413888	0.183377	0.356416	0.164226	0.263269					-0.0153159	0.0720041	0.279962
		77G7	0.866695	0.462661	1	0.654154	-0.0285322	-0.0236531	-0.445431	0.225332	0.149107	0.0592742	0.117887	0.231221	0.0858273	-0.0929214	0.221129	0.3314	0.191193	0.104915	0.243479	0.289137	0.795736	0.778123	0.868319	0.472679	0.228245	0.352573	0.178353	0.278545	0.234918	0.396671	-0.0347253	0.276096	0.394461	0.0612664	-0.00875842	0.0674215	0.318421	0.271318	-0.204911	0.174236					0.3842	0.125667	0.495117
		TauAB	0.618359	0.189978	0.654154	1	-0.133225	0.300455	0.0594978	0.846318	0.803663	0.52616	0.793378	0.853423	0.705991	0.296959	0.660093	0.851342	0.80266	0.58769	0.832198	0.871669	0.7097	0.568104	0.881691	0.961333	0.754919	0.748192	0.784302	0.858263	0.831969	0.837947	0.726343	0.854963	0.742296	0.664489	0.663515	0.634839	0.88476	0.751184	0.466755	0.792471					0.829622	0.77338	0.899392
	210-224 p1	Tau12	0.339924	0.207871	-0.0285322	-0.133225	1	0.0680407	-0.151934	-0.156426	-0.0448904	-0.0790592	-0.130332	0.0311615	-0.069067	-0.275389	-0.0293611	-0.0586814	0.104988	0.0515398	-0.0214391	-0.0174545	0.145729	0.375487	-0.179013	-0.0870774	0.269937	0.333055	0.0697327	0.123327	0.0682563	0.159319	-0.0449533	0.0931202	-0.162134	-0.151313	-0.0126648	0.086065	0.0789915	0.175401	-0.109892	0.0847665					0.191974	-0.270967	0.0242083
		HT7	0.218827	0.676693	-0.0236531	0.300455	0.0680407	1	-0.159958	0.592687	0.656494	0.891673	0.599614	0.553256	0.781014	0.752557	0.504906	0.412976	0.651659	0.902208	0.611811	0.557511	0.0826311	0.0986778	0.184731	0.451418	0.547065	0.51673	0.635446	0.523866	0.588647	0.527585	0.612763	0.553978	0.407675	0.640492	0.710256	0.824643	0.545289	0.600521	0.78532	0.686092					0.219473	0.484034	0.47995
		77G7	-0.506694	-0.626873	-0.445431	0.0594978	-0.151934	-0.159958	1	0.316556	0.237529	0.0276122	0.334477	0.285662	0.242626	-0.019524	0.184271	0.367161	0.163404	0.0426896	0.205845	0.292193	-0.385141	-0.427353	-0.272326	0.119433	0.052918	0.0139076	0.196486	0.19994	0.128551	0.0550543	0.925221	0.217714	-0.0891071	0.135899	0.279816	0.139078	0.263549	0.0134828	0.721209	0.223248					0.0845531	0.417768	0.1566
		TauAB	0.262936	0.181904	0.225332	0.846318	-0.156426	0.592687	0.316556	1	0.962128	0.812368	0.988945	0.965004	0.945731	0.645037	0.84077	0.934553	0.932754	0.852948	0.97686	0.968159	0.321909	0.195923	0.573529	0.908965	0.796087	0.773548	0.953373	0.920157	0.917767	0.86418	0.968344	0.946838	0.642654	0.899808	0.926859	0.883918	0.947401	0.856244	0.787107	0.96003					0.720452	0.96164	0.90699
	210-224 p2	Tau12	0.304738	0.179498	0.149107	0.803663	-0.0448904	0.656494	0.237529	0.962128	1	0.819542	0.965985	0.976527	0.952992	0.593617	0.758764	0.868507	0.98331	0.861267	0.953084	0.95968	0.378812	0.264326	0.513927	0.911133	0.904472	0.82951	0.959887	0.962148	0.974395	0.883301	0.947279	0.964802	0.759794	0.884039	0.92336	0.884775	0.956987	0.874624	0.787223	0.979353					0.800047	0.879804	0.848095
		HT7	0.208868	0.562028	0.0592742	0.52616	-0.0790592	0.891673	0.0276122	0.812368	0.819542	1	0.819256	0.770563	0.906475	0.861903	0.729664	0.723629	0.78333	0.951733	0.841942	0.755371	0.053063	0.0403158	0.290217	0.615393	0.641458	0.672936	0.846107	0.72255	0.746459	0.725632	0.845547	0.771089	0.516381	0.863598	0.829001	0.894969	0.725873	0.736401	0.737278	0.842168					0.404924	0.759561	0.65514
		77G7	0.176848	0.126469	0.117887	0.793378	-0.130332	0.599614	0.334477	0.988945	0.965985	0.819256	1	0.965333	0.939755	0.660164	0.835766	0.906807	0.9374	0.848299	0.976488	0.959484	0.242945	0.103596	0.493476	0.876391	0.793917	0.747473	0.964945	0.915683	0.914708	0.831711	0.976388	0.940589	0.611719	0.932063	0.958407	0.897152	0.933309	0.844626	0.782049	0.965814					0.711454	0.96164	0.868366
		TauAB	0.363348	0.15102	0.231221	0.853423	0.0311615	0.553256	0.285662	0.965004	0.976527	0.770563	0.965333	1	0.911627	0.513354	0.786409	0.932824	0.969923	0.809964	0.97121	0.98469	0.396489	0.299265	0.54964	0.920684	0.892006	0.856315	0.974128	0.984751	0.959762	0.906221	0.952867	0.991079	0.713227	0.866528	0.901157	0.857801	0.987044	0.866878	0.689431	0.981028					0.838909	0.89444	0.891956
	210-224 p3	Tau12	0.228342	0.330322	0.0858273	0.705991	-0.069067	0.781014	0.242626	0.945731	0.952992	0.906475	0.939755	0.911627	1	0.728715	0.750611	0.844694	0.923116	0.947134	0.933356	0.893389	0.235904	0.175842	0.417612	0.822157	0.811093	0.780715	0.924061	0.876192	0.90458	0.848352	0.941487	0.901643	0.619648	0.860796	0.923661	0.951053	0.892697	0.849704	0.873332	0.954364					0.613273	0.891284	0.795452
		HT7	-0.0894207	0.488012	-0.0929214	0.296959	-0.275389	0.752557	-0.019524	0.645037	0.593617	0.861903	0.660164	0.513354	0.728715	1	0.737143	0.524025	0.552026	0.819923	0.670207	0.497226	-0.1827	-0.216644	0.143949	0.372213	0.367658	0.439792	0.657072	0.447144	0.525204	0.520132	0.67733	0.52387	0.228416	0.811395	0.686629	0.722741	0.430377	0.638908	0.687912	0.60364					0.138103	0.665545	0.479608
		77G7	0.215793	0.281999	0.221129	0.660093	-0.0293611	0.504906	0.184271	0.84077	0.758764	0.729664	0.835766	0.786409	0.750611	0.737143	1	0.815834	0.779227	0.78333	0.865432	0.806633	0.184314	0.111944	0.482545	0.676826	0.620266	0.714725	0.865113	0.745587	0.740158	0.765232	0.886972	0.804931	0.376524	0.891201	0.805145	0.733635	0.745668	0.858041	0.680333	0.799322					0.582553	0.798223	0.873761
		TauAB	0.352624	0.175412	0.3314	0.851342	-0.0586814	0.412976	0.367161	0.934553	0.868507	0.723629	0.906807	0.932824	0.844694	0.524025	0.815834	1	0.843351	0.735277	0.939404	0.918515	0.308759	0.264215	0.547258	0.841421	0.744944	0.819774	0.911905	0.902589	0.84983	0.893676	0.916526	0.935695	0.585087	0.805449	0.780851	0.76178	0.915727	0.804084	0.577771	0.88865					0.732278	0.914723	0.876917
	212-224 p1	Tau12	0.386626	0.222352	0.191193	0.80266	0.104988	0.651659	0.163404	0.932754	0.98331	0.78333	0.9374	0.969923	0.923116	0.552026	0.779227	0.843351	1	0.861845	0.945284	0.952695	0.452548	0.358983	0.540732	0.911696	0.946962	0.881581	0.96469	0.974433	0.985959	0.909603	0.950217	0.97203	0.73526	0.864403	0.916626	0.884288	0.961155	0.923945	0.793988	0.981977					0.845438	0.824761	0.877254
		HT7	0.280621	0.556497	0.104915	0.58769	0.0515398	0.902208	0.0426896	0.852948	0.861267	0.951733	0.848299	0.809964	0.947134	0.819923	0.78333	0.735277	0.861845	1	0.873371	0.804272	0.196454	0.184233	0.379778	0.702997	0.739759	0.755051	0.87841	0.778254	0.818557	0.795277	0.903535	0.818544	0.501625	0.845724	0.888698	0.955448	0.793723	0.851334	0.899716	0.897562					0.489494	0.7708	0.763126
		77G7	0.32519	0.270006	0.243479	0.832198	-0.0214391	0.611811	0.205845	0.97686	0.953084	0.841942	0.976488	0.97121	0.933356	0.670207	0.865432	0.939404	0.945284	0.873371	1	0.953213	0.320534	0.232855	0.552759	0.88424	0.832303	0.842587	0.989006	0.942545	0.934615	0.912212	0.987475	0.970869	0.619815	0.929749	0.922544	0.904704	0.944114	0.905023	0.734706	0.974172					0.748455	0.935438	0.898908
		TauAB	0.383531	0.162885	0.289137	0.871669	-0.0174545	0.557511	0.292193	0.968159	0.95968	0.755371	0.959484	0.98469	0.893389	0.497226	0.806633	0.918515	0.952695	0.804272	0.953213	1	0.426928	0.303497	0.612951	0.930693	0.844875	0.803373	0.949961	0.955845	0.924901	0.861459	0.938419	0.966143	0.699593	0.851844	0.904923	0.844801	0.985927	0.835689	0.709956	0.966947					0.808381	0.885397	0.933524
	225-240 p1	Tau12	0.863998	0.254266	0.795736	0.7097	0.145729	0.0826311	-0.385141	0.321909	0.378812	0.053063	0.242945	0.396489	0.235904	-0.1827	0.184314	0.308759	0.452548	0.196454	0.320534	0.426928	1	0.927718	0.852749	0.666199	0.580609	0.533026	0.304218	0.494631	0.503513	0.529482	0.0769106	0.436901	0.665203	0.121598	0.166206	0.189672	0.492218	0.460627	0.0667906	0.351384					0.688819	0.140866	0.552286
		HT7	0.934756	0.413667	0.778123	0.568104	0.375487	0.0986778	-0.427353	0.195923	0.264326	0.0403158	0.103596	0.299265	0.175842	-0.216644	0.111944	0.264215	0.358983	0.184233	0.232855	0.303497	0.927718	1	0.694927	0.509814	0.543912	0.589034	0.231159	0.422907	0.416274	0.53741	-0.0120502	0.372527	0.549254	-0.0118972	0.0289917	0.136926	0.401379	0.429567	-0.040333	0.272171					0.594319	0.0026115	0.446512
		77G7	0.744927	0.320667	0.868319	0.881691	-0.179013	0.184731	-0.272326	0.573529	0.513927	0.290217	0.493476	0.54964	0.417612	0.143949	0.482545	0.547258	0.540732	0.379778	0.552759	0.612951	0.852749	0.694927	1	0.793197	0.509643	0.512044	0.489564	0.570446	0.568214	0.598527	0.367446	0.562743	0.6138	0.411114	0.393742	0.385048	0.617283	0.554181	0.260039	0.504051					0.630184	0.470058	0.761928
		TauAB	0.52337	0.158305	0.472679	0.961333	-0.0870774	0.451418	0.119433	0.908965	0.911133	0.615393	0.876391	0.920684	0.822157	0.372213	0.676826	0.841421	0.911696	0.702997	0.88424	0.930693	0.666199	0.509814	0.793197	1	0.861851	0.788433	0.856443	0.924262	0.925602	0.865644	0.821358	0.912043	0.788364	0.736967	0.794991	0.757256	0.946161	0.823418	0.660549	0.889338					0.862526	0.81754	0.908147
	225-240 p2	Tau12	0.510505	0.206135	0.228245	0.754919	0.269937	0.547065	0.052918	0.796087	0.904472	0.641458	0.793917	0.892006	0.811093	0.367658	0.620266	0.744944	0.946962	0.739759	0.832303	0.844875	0.580609	0.543912	0.509643	0.861851	1	0.933112	0.870076	0.950045	0.965727	0.916989	0.811469	0.920182	0.794549	0.707556	0.755553	0.752294	0.894927	0.894196	0.647309	0.890409					0.915093	0.652796	0.769062
		HT7	0.599366	0.376506	0.352573	0.748192	0.333055	0.51673	0.0139076	0.773548	0.82951	0.672936	0.747473	0.856315	0.780715	0.439792	0.714725	0.819774	0.881581	0.755051	0.842587	0.803373	0.533026	0.589034	0.512044	0.788433	0.933112	1	0.870015	0.917038	0.908472	0.977526	0.816585	0.915215	0.686894	0.697119	0.673663	0.720451	0.854986	0.924917	0.554673	0.851932					0.852953	0.645017	0.795517
		77G7	0.320732	0.26119	0.178353	0.784302	0.0697327	0.635446	0.196486	0.953373	0.959887	0.846107	0.964945	0.974128	0.924061	0.657072	0.865113	0.911905	0.96469	0.87841	0.989006	0.949961	0.304218	0.231159	0.489564	0.856443	0.870076	0.870015	1	0.956351	0.947001	0.912698	0.99056	0.978574	0.633939	0.935809	0.927524	0.899958	0.941625	0.918223	0.72913	0.982063					0.777333	0.890378	0.878891
		TauAB	0.458641	0.172305	0.278545	0.858263	0.123327	0.523866	0.19994	0.920157	0.962148	0.72255	0.915683	0.984751	0.876192	0.447144	0.745587	0.902589	0.974433	0.778254	0.942545	0.955845	0.494631	0.422907	0.570446	0.924262	0.950045	0.917038	0.956351	1	0.980628	0.943444	0.91616	0.993167	0.768338	0.819468	0.84357	0.813584	0.977628	0.89395	0.643356	0.961056					0.905463	0.822496	0.873982
	225-240p3	Tau12	0.41977	0.202493	0.234918	0.831969	0.0682563	0.588647	0.128551	0.917767	0.974395	0.746459	0.914708	0.959762	0.90458	0.525204	0.740158	0.84983	0.985959	0.818557	0.934615	0.924901	0.503513	0.416274	0.568214	0.925602	0.965727	0.908472	0.947001	0.980628	1	0.941854	0.921629	0.971928	0.787465	0.839313	0.8598	0.837401	0.946615	0.929566	0.739991	0.95567					0.883116	0.817063	0.849323
		HT7	0.560814	0.362022	0.396671	0.837947	0.159319	0.527585	0.0550543	0.86418	0.883301	0.725632	0.831711	0.906221	0.848352	0.520132	0.765232	0.893676	0.909603	0.795277	0.912212	0.861459	0.529482	0.53741	0.598527	0.865644	0.916989	0.977526	0.912698	0.943444	0.941854	1	0.881718	0.951233	0.709847	0.768769	0.737822	0.777068	0.900702	0.942831	0.62153	0.895372					0.844736	0.768359	0.854012
		77G7	0.050733	0.0588297	-0.0347253	0.726343	-0.0449533	0.612763	0.925221	0.968344	0.947279	0.845547	0.976388	0.952867	0.941487	0.67733	0.886972	0.916526	0.950217	0.903535	0.987475	0.938419	0.0769106	-0.0120502	0.367446	0.821358	0.811469	0.816585	0.99056	0.91616	0.921629	0.881718	1	0.952207	0.501186	0.931874	0.946165	0.918162	0.918231	0.919931	0.802053	0.977018					0.672034	0.933416	0.874695
		TauAB	0.429882	0.215545	0.276096	0.854963	0.0931202	0.553978	0.217714	0.946838	0.964802	0.771089	0.940589	0.991079	0.901643	0.52387	0.804931	0.935695	0.97203	0.818544	0.970869	0.966143	0.436901	0.372527	0.562743	0.912043	0.920182	0.915215	0.978574	0.993167	0.971928	0.951233	0.952207	1	0.722987	0.859795	0.868873	0.844239	0.977628	0.9099	0.672243	0.973852					0.864058	0.863245	0.897022
	386-406 p1	Tau12	0.558273	0.157733	0.394461	0.742296	-0.162134	0.407675	-0.0891071	0.642654	0.759794	0.516381	0.611719	0.713227	0.619648	0.228416	0.376524	0.585087	0.73526	0.501625	0.619815	0.699593	0.665203	0.549254	0.6138	0.788364	0.794549	0.686894	0.633939	0.768338	0.787465	0.709847	0.501186	0.722987	1	0.544314	0.48746	0.453164	0.716395	0.600849	0.338464	0.656813					0.809295	0.486077	0.587351
		HT7	0.114571	0.235105	0.0612664	0.664489	-0.151313	0.640492	0.135899	0.899808	0.884039	0.863598	0.932063	0.866528	0.860796	0.811395	0.891201	0.805449	0.864403	0.845724	0.929749	0.851844	0.121598	-0.0118972	0.411114	0.736967	0.707556	0.697119	0.935809	0.819468	0.839313	0.768769	0.931874	0.859795	0.544314	1	0.910471	0.841825	0.796412	0.838353	0.707378	0.885889					0.618437	0.877031	0.780955
		77G7	0.102631	0.178993	-0.00875842	0.663515	-0.0126648	0.710256	0.279816	0.926859	0.92336	0.829001	0.958407	0.901157	0.923661	0.686629	0.805145	0.780851	0.916626	0.888698	0.922544	0.904923	0.166206	0.0289917	0.393742	0.794991	0.755553	0.673663	0.927524	0.84357	0.8598	0.737822	0.946165	0.868873	0.48746	0.910471	1	0.948811	0.875737	0.819279	0.862414	0.948399					0.60756	0.887662	0.816774
		TauAB	0.224378	0.413888	0.0674215	0.634839	0.086065	0.824643	0.139078	0.883918	0.884775	0.894969	0.897152	0.857801	0.951053	0.722741	0.733635	0.76178	0.884288	0.955448	0.904704	0.844801	0.189672	0.136926	0.385048	0.757256	0.752294	0.720451	0.899958	0.813584	0.837401	0.777068	0.918162	0.844239	0.453164	0.841825	0.948811	1	0.848287	0.823346	0.875718	0.935634					0.525201	0.838978	0.77164
	386-406 p2	Tau12	0.454429	0.183377	0.318421	0.88476	0.0789915	0.545289	0.263549	0.947401	0.956987	0.725873	0.933309	0.987044	0.892697	0.430377	0.745668	0.915727	0.961155	0.793723	0.944114	0.985927	0.492218	0.401379	0.617283	0.946161	0.894927	0.854986	0.941625	0.977628	0.946615	0.900702	0.918231	0.977628	0.716395	0.796412	0.875737	0.848287	1	0.850435	0.690696	0.970007					0.84541	0.856855	0.917269
		HT7	0.431627	0.356416	0.271318	0.751184	0.175401	0.600521	0.0134828	0.856244	0.874624	0.736401	0.844626	0.866878	0.849704	0.638908	0.858041	0.804084	0.923945	0.851334	0.905023	0.835689	0.460627	0.429567	0.554181	0.823418	0.894196	0.924917	0.918223	0.89395	0.929566	0.942831	0.919931	0.9099	0.600849	0.838353	0.819279	0.823346	0.850435	1	0.783429	0.894267					0.788339	0.757423	0.867222
		77G7	-0.127487	0.164226	-0.204911	0.466755	-0.109892	0.78532	0.721209	0.787107	0.787223	0.737278	0.782049	0.689431	0.873332	0.687912	0.680333	0.577771	0.793988	0.899716	0.734706	0.709956	0.0667906	-0.040333	0.260039	0.660549	0.647309	0.554673	0.72913	0.643356	0.739991	0.62153	0.802053	0.672243	0.338464	0.707378	0.862414	0.875718	0.690696	0.783429	1	0.792235					0.37331	0.727705	0.693168
		TauAB	0.341839	0.263269	0.174236	0.792471	0.0847665	0.686092	0.223248	0.96003	0.979353	0.842168	0.965814	0.981028	0.954364	0.60364	0.799322	0.88865	0.981977	0.897562	0.974172	0.966947	0.351384	0.272171	0.504051	0.889338	0.890409	0.851932	0.982063	0.961056	0.95567	0.895372	0.977018	0.973852	0.656813	0.885889	0.948399	0.935634	0.970007	0.894267	0.792235	1					0.768309	0.881799	0.881292
	386-406 p3	Tau12
		HT7
		77G7
		TauAB
	407-438 p1	Tau12	0.559028	-0.0153159	0.3842	0.829622	0.191974	0.219473	0.0845531	0.720452	0.800047	0.404924	0.711454	0.838909	0.613273	0.138103	0.582553	0.732278	0.845438	0.489494	0.748455	0.808381	0.688819	0.594319	0.630184	0.862526	0.915093	0.852953	0.777333	0.905463	0.883116	0.844736	0.672034	0.864058	0.809295	0.618437	0.60756	0.525201	0.84541	0.788339	0.37331	0.768309					1	0.589224	0.768386
		HT7	0.0744725	0.0720041	0.125667	0.77338	-0.270967	0.484034	0.417768	0.96164	0.879804	0.759561	0.96164	0.89444	0.891284	0.665545	0.798223	0.914723	0.824761	0.7708	0.935438	0.885397	0.140866	0.0026115	0.470058	0.81754	0.652796	0.645017	0.890378	0.822496	0.817063	0.768359	0.933416	0.863245	0.486077	0.877031	0.887662	0.838978	0.856855	0.757423	0.727705	0.881799					0.589224	1	0.811102
		77G7	0.514127	0.279962	0.495117	0.899392	0.0242083	0.47995	0.1566	0.90699	0.848095	0.65514	0.868366	0.891956	0.795452	0.479608	0.873761	0.876917	0.877254	0.763126	0.898908	0.933524	0.552286	0.446512	0.761928	0.908147	0.769062	0.795517	0.878891	0.873982	0.849323	0.854012	0.874695	0.897022	0.587351	0.780955	0.816774	0.77164	0.917269	0.867222	0.693168	0.881292					0.768386	0.811102	1
		TauAB	0.409881	0.10821	0.226922	0.811854	0.130337	0.481865	0.278554	0.882388	0.924619	0.703677	0.8913	0.970443	0.827654	0.362472	0.667148	0.891177	0.920346	0.711158	0.905059	0.945087	0.397843	0.32525	0.487952	0.867736	0.880065	0.836395	0.923066	0.968165	0.912417	0.860425	0.866318	0.959954	0.732427	0.779777	0.817553	0.778089	0.961556	0.770347	0.523577	0.933212					0.855374	0.80145	0.809465
	407-438 p2	Tau12	0.27497	0.0130288	0.222231	0.705072	-0.0414711	0.180729	0.181997	0.73458	0.734832	0.523986	0.730249	0.774396	0.637192	0.463642	0.719222	0.821155	0.731186	0.520073	0.787265	0.69916	0.309598	0.273434	0.419847	0.690807	0.74446	0.817731	0.790748	0.808545	0.80119	0.853583	0.733757	0.819134	0.622174	0.743622	0.564198	0.503473	0.706887	0.795933	0.346985	0.700199					0.800697	0.718603	0.662086
		HT7	0.110855	-0.156908	0.206043	0.780157	-0.390332	0.150456	0.248647	0.795068	0.759876	0.49455	0.80011	0.772479	0.656978	0.458098	0.630271	0.783256	0.704431	0.470452	0.785922	0.727052	0.294127	0.102834	0.52689	0.777827	0.63558	0.594763	0.745721	0.755941	0.769012	0.713361	0.709952	0.761963	0.635899	0.766826	0.641138	0.533347	0.709302	0.6689	0.408162	0.690665					0.719034	0.838374	0.648377
		77G7	0.525035	0.374512	0.400408	0.511646	0.194545	0.209729	-0.0441413	0.478752	0.478837	0.488606	0.438662	0.553286	0.431997	0.3636	0.606296	0.681461	0.503127	0.439052	0.574917	0.497202	0.288068	0.427181	0.328314	0.423361	0.561729	0.783905	0.599049	0.611689	0.555716	0.750231	0.500219	0.638461	0.497032	0.505077	0.273467	0.314382	0.512921	0.626678	0.064659	0.495809					0.595951	0.399256	0.52539
		TauAB	0.259293	-0.0468682	0.112846	0.765437	-0.0608538	0.499014	0.407714	0.865161	0.914473	0.614887	0.864295	0.900902	0.840349	0.291129	0.51492	0.765462	0.881617	0.673358	0.803725	0.903989	0.413519	0.266361	0.47689	0.884858	0.821015	0.66455	0.802384	0.879209	0.866028	0.720365	0.795043	0.854809	0.739548	0.663844	0.822458	0.76189	0.918515	0.661652	0.690834	0.878698					0.757476	0.785678	0.745882
	407-438 p3	Tau12
		HT7
		77G7
		TauAB
SI	175-190 p1	HT7	0.105611	0.236343	-0.11973	0.477574	-0.0326617	0.684805	0.346013	0.757359	0.80983	0.807898	0.740432	0.745759	0.862249	0.653384	0.608565	0.71539	0.783172	0.791741	0.735389	0.68918	0.101455	0.149796	0.129302	0.618882	0.775105	0.777263	0.754642	0.756299	0.804124	0.790865	0.799819	0.768953	0.600423	0.669239	0.681298	0.711361	0.710005	0.788147	0.774792	0.767987					0.577635	0.687915	0.586735
		77G7	0.152886	0.315434	0.0256092	0.68899	-0.114382	0.765718	0.27618	0.944911	0.940455	0.958974	0.942572	0.90723	0.979287	0.806825	0.817078	0.871497	0.917503	0.923739	0.94213	0.872412	0.15061	0.0996873	0.357999	0.802087	0.816831	0.813072	0.936586	0.880509	0.91566	0.879197	0.960472	0.91113	0.599708	0.898831	0.900382	0.904953	0.867868	0.915812	0.84761	0.934204					0.654735	0.908643	0.806708
		TauAB	0.196859	0.272139	0.0570678	0.695857	-0.138642	0.69343	0.302197	0.911448	0.922012	0.899538	0.89341	0.886482	0.948966	0.726266	0.746889	0.87022	0.88995	0.861641	0.897004	0.842156	0.209472	0.181688	0.355826	0.797835	0.833157	0.837083	0.891287	0.878745	0.912048	0.895414	0.90888	0.89919	0.675595	0.824586	0.810216	0.8216	0.850911	0.885662	0.784461	0.891169					0.693265	0.863167	0.764563
	210-224 p1	HT7	0.124368	0.398622	-0.241982	0.269999	0.349618	0.82427	0.202104	0.608235	0.706545	0.790463	0.618453	0.64117	0.795022	0.597063	0.513884	0.533256	0.735583	0.823006	0.635752	0.5813	0.030489	0.157892	-0.0434521	0.462514	0.750598	0.741507	0.690555	0.663386	0.71095	0.69139	0.699487	0.671236	0.397789	0.568688	0.678395	0.765572	0.626136	0.749572	0.770676	0.73053					0.44841	0.505706	0.485026
		77G7	0.0850266	0.17962	-0.146847	0.555951	-0.00524976	0.717036	0.168841	0.793505	0.881554	0.824046	0.824233	0.81273	0.891211	0.640276	0.533551	0.67232	0.865475	0.800593	0.811271	0.730184	0.165475	0.105415	0.207032	0.729552	0.854238	0.742516	0.825579	0.821777	0.890396	0.783162	0.79453	0.812234	0.626099	0.767953	0.816408	0.84003	0.768862	0.813262	0.746656	0.849658					0.659763	0.760262	0.570671
		TauAB	-0.0453203	0.372106	-0.235834	0.289069	-0.0939096	0.807289	0.0227514	0.608714	0.672394	0.784325	0.619391	0.53875	0.790201	0.792166	0.474104	0.431833	0.656065	0.796349	0.609714	0.470723	0.0113751	0.0122818	0.0669627	0.478104	0.6238	0.564219	0.613901	0.540511	0.674286	0.605567	0.612902	0.557041	0.402964	0.631765	0.66373	0.743314	0.492007	0.72169	0.828207	0.638006					0.312176	0.580772	0.392471
	210-224 p2	HT7	0.202824	0.339692	-0.0556471	0.501639	0.128136	0.706378	0.294648	0.764705	0.812678	0.840829	0.748682	0.779034	0.868362	0.651317	0.659587	0.762754	0.809948	0.828228	0.777848	0.716335	0.124475	0.21839	0.146502	0.623758	0.811944	0.85841	0.804016	0.797736	0.823631	0.852492	0.823829	0.815446	0.561431	0.687323	0.697949	0.754704	0.749088	0.842274	0.732397	0.80731					0.612329	0.687097	0.637305
		77G7	0.191241	0.428157	0.0532915	0.656973	-0.0332484	0.811133	0.208506	0.921115	0.907495	0.982139	0.916014	0.879817	0.969114	0.846424	0.85196	0.855423	0.900925	0.957064	0.936379	0.848167	0.13835	0.121948	0.352517	0.762414	0.795814	0.827974	0.9336	0.854492	0.889088	0.882766	0.9589	0.894481	0.531795	0.895356	0.894238	0.923378	0.844271	0.938578	0.857143	0.925309					0.608576	0.877926	0.817201
		TauAB	0.271925	0.472093	0.0378876	0.570187	0.106793	0.791172	0.141397	0.812374	0.849718	0.918323	0.796937	0.809892	0.910319	0.75809	0.743982	0.780933	0.858717	0.906987	0.843272	0.753105	0.193717	0.258877	0.264803	0.684276	0.839795	0.892089	0.861806	0.827044	0.869809	0.900764	0.860755	0.851839	0.57825	0.776177	0.762618	0.830156	0.778682	0.926954	0.778288	0.855194					0.630866	0.730742	0.713184
	210-224 p3	HT7	0.0473664	0.40218	-0.189805	0.327172	0.0711346	0.84307	0.29785	0.681715	0.714232	0.827045	0.665316	0.630855	0.851617	0.699472	0.558834	0.578442	0.704118	0.858696	0.65358	0.601507	-0.00305292	0.0785804	0.0462718	0.503947	0.647912	0.648194	0.667376	0.614948	0.678377	0.658188	0.742707	0.642759	0.373015	0.584539	0.703783	0.788122	0.622341	0.718723	0.897882	0.720509					0.333871	0.613198	0.537952
		77G7	0.199544	0.615821	0.0447476	0.450584	0.0364425	0.850384	0.100903	0.734341	0.714142	0.904531	0.700946	0.657497	0.860522	0.844177	0.734699	0.672334	0.719525	0.920284	0.745085	0.632353	0.0852307	0.172949	0.237547	0.555076	0.640073	0.735712	0.739388	0.643997	0.705901	0.766163	0.776443	0.695886	0.362561	0.692876	0.710553	0.817667	0.640823	0.840379	0.848886	0.745252					0.362763	0.674615	0.665224
		TauAB	0.277178	0.266473	0.0610455	0.63291	0.0795664	0.557843	0.107556	0.771621	0.835548	0.789616	0.776171	0.823681	0.817012	0.610957	0.637421	0.792379	0.835907	0.737239	0.833755	0.722799	0.249596	0.276647	0.28063	0.711812	0.877332	0.902908	0.851745	0.866806	0.895563	0.917943	0.793947	0.86824	0.669449	0.763768	0.678989	0.716982	0.7684	0.882552	0.527973	0.814262					0.775991	0.726925	0.626021
	212-224 p1	HT7	0.0136554	0.149115	-0.23704	0.409684	-0.00454	0.645492	0.324198	0.707221	0.787362	0.766005	0.714039	0.713693	0.83038	0.631224	0.524866	0.651597	0.760064	0.742698	0.703979	0.627381	0.0352833	0.0769102	0.0299291	0.5728	0.776036	0.743164	0.730019	0.732301	0.794433	0.753484	0.754269	0.734819	0.571254	0.6574	0.666906	0.696409	0.660841	0.758457	0.724238	0.738742					0.568196	0.663498	0.480313
		77G7	0.0925607	0.182685	-0.114898	0.605139	-0.066493	0.72878	0.209845	0.855482	0.926798	0.87394	0.880438	0.862203	0.925321	0.704553	0.645815	0.74137	0.906823	0.8392	0.864033	0.793805	0.166995	0.093198	0.253255	0.766929	0.871345	0.780274	0.879999	0.863879	0.925818	0.825178	0.863853	0.863435	0.669458	0.841778	0.854636	0.849062	0.811139	0.864638	0.782422	0.888486					0.702609	0.812227	0.652792
		TauAB	0.0152292	0.31973	-0.162881	0.467259	-0.107266	0.806861	0.21302	0.784259	0.820722	0.881168	0.786561	0.727491	0.915277	0.799542	0.613842	0.655784	0.792849	0.874401	0.772562	0.668718	0.0491232	0.0397861	0.160703	0.636221	0.733662	0.693264	0.771124	0.714546	0.804404	0.747004	0.7983	0.736051	0.504045	0.745914	0.787252	0.840392	0.685554	0.81329	0.877936	0.794218					0.46861	0.756344	0.575162
	225-240 p1	HT7	-0.0699202	-0.0464852	-0.325073	0.370693	-0.08725	0.573688	0.400572	0.660422	0.772067	0.663147	0.67861	0.679341	0.772268	0.499417	0.400549	0.562134	0.728823	0.639336	0.621654	0.604436	0.0434428	0.0213675	-0.00837029	0.563695	0.751309	0.631204	0.65552	0.694823	0.759573	0.642156	0.696045	0.676146	0.6301	0.590409	0.635946	0.614874	0.630298	0.641688	0.706442	0.687929					0.576529	0.607975	0.402684
		77G7	0.102004	0.140253	-0.126189	0.591459	-0.0783114	0.718907	0.19936	0.82352	0.91905	0.830218	0.847921	0.840256	0.90183	0.637299	0.571939	0.689146	0.896892	0.802398	0.818637	0.775012	0.21597	0.12591	0.253346	0.768698	0.880848	0.752366	0.839407	0.849919	0.918562	0.791297	0.812545	0.83652	0.719951	0.792561	0.825036	0.812532	0.796768	0.824125	0.770047	0.863537					0.715833	0.763066	0.615389
		TauAB	-0.0221443	0.232139	-0.253823	0.374626	-0.1055	0.791508	0.166237	0.688622	0.780544	0.793929	0.70157	0.652331	0.845475	0.705894	0.481657	0.512856	0.754533	0.797576	0.663791	0.591813	0.0796411	0.046344	0.0934591	0.583153	0.73425	0.624285	0.681803	0.657213	0.769297	0.656482	0.688249	0.656317	0.560671	0.664376	0.722092	0.754594	0.611245	0.737558	0.846817	0.721737					0.465953	0.631288	0.460597
	225-240 p2	HT7	0.0716358	0.102357	-0.23749	0.367458	0.0902075	0.574003	0.268964	0.624968	0.747899	0.683642	0.637403	0.677849	0.743272	0.519192	0.466441	0.589369	0.736645	0.657983	0.636376	0.584148	0.0950606	0.151064	-0.00292344	0.529242	0.805487	0.763215	0.6876	0.724803	0.778542	0.736088	0.677538	0.710747	0.631683	0.599782	0.581457	0.592661	0.623103	0.728923	0.605921	0.686769					0.638301	0.546117	0.423994
		77G7	0.158544	0.229119	-0.0791481	0.60087	0.0144172	0.714021	0.148962	0.832843	0.916044	0.872258	0.857207	0.86164	0.899098	0.701105	0.678855	0.748159	0.91192	0.833496	0.864362	0.785542	0.197624	0.15413	0.253433	0.74852	0.902385	0.842506	0.893558	0.880949	0.936284	0.864762	0.863321	0.880132	0.689637	0.848698	0.821853	0.818859	0.805289	0.902384	0.728014	0.882826					0.750559	0.770746	0.66029
		TauAB	0.201169	0.251017	-0.051727	0.563468	0.0204763	0.668122	0.149386	0.770953	0.861485	0.818495	0.774827	0.801681	0.858703	0.649467	0.610706	0.721795	0.853477	0.785666	0.795708	0.716512	0.226508	0.235585	0.222656	0.6985	0.88606	0.858488	0.823722	0.839748	0.898316	0.868143	0.78749	0.835821	0.708147	0.750798	0.709868	0.735067	0.751168	0.870087	0.673517	0.814505					0.728879	0.697279	0.59955
	225-240p3	HT7	0.115533	0.268237	-0.12781	0.428229	0.0211282	0.660941	0.281772	0.702679	0.76467	0.783638	0.687733	0.700916	0.819226	0.655577	0.593135	0.679041	0.747676	0.765975	0.701479	0.629776	0.0868936	0.166866	0.0871319	0.562004	0.764557	0.79104	0.72766	0.725692	0.778751	0.790066	0.7549	0.738803	0.573641	0.645775	0.626321	0.670259	0.656957	0.790716	0.716171	0.725648					0.563997	0.632851	0.536554
		77G7	0.116899	0.381308	-0.058298	0.574827	-0.0272001	0.813838	0.171981	0.869886	0.890304	0.96007	0.879469	0.836808	0.946647	0.857941	0.796511	0.778982	0.884309	0.933793	0.892698	0.78504	0.0929742	0.0770562	0.259489	0.709482	0.80554	0.808973	0.902672	0.824154	0.883334	0.852313	0.917469	0.855666	0.538526	0.884869	0.869491	0.894358	0.785327	0.929411	0.852506	0.889953					0.59695	0.827854	0.724523
		TauAB	0.245663	0.439764	0.0407465	0.586211	-0.03145	0.790667	0.0774306	0.810909	0.859512	0.906684	0.795252	0.789318	0.908439	0.785568	0.713168	0.736728	0.855568	0.890699	0.82639	0.732421	0.239416	0.253554	0.312571	0.710394	0.838647	0.851934	0.837741	0.809384	0.881869	0.879753	0.830837	0.827321	0.649712	0.789167	0.752966	0.805554	0.750944	0.920656	0.801081	0.83206					0.636768	0.730315	0.685575
	386-406 p1	HT7	0.233566	0.631328	-0.0474509	0.267697	0.254746	0.814158	-0.0358156	0.546549	0.600989	0.794013	0.525297	0.528412	0.723721	0.734036	0.60685	0.498723	0.639754	0.823737	0.593398	0.477025	0.0911346	0.25206	0.0751598	0.394819	0.651793	0.748187	0.630285	0.562761	0.636168	0.709078	0.619706	0.595239	0.354419	0.565132	0.55673	0.678929	0.50539	0.794631	0.713922	0.625855					0.359742	0.439698	0.49619
		77G7	0.0459097	0.634909	-0.16074	0.156498	0.107548	0.894814	-0.165827	0.490138	0.530671	0.784924	0.495649	0.410473	0.685296	0.844937	0.561545	0.316407	0.56345	0.827424	0.5258	0.378336	-0.0194156	0.0465423	0.0537974	0.323122	0.503377	0.524356	0.547904	0.410211	0.535036	0.524436	0.539619	0.450426	0.20389	0.587071	0.609751	0.716907	0.378828	0.714927	0.820418	0.556264					0.156798	0.421397	0.408046
		TauAB	0.187613	0.749617	-0.0507619	0.097447	0.247315	0.838258	-0.217409	0.369581	0.409279	0.691868	0.345685	0.308145	0.586165	0.719805	0.473308	0.26241	0.459163	0.755993	0.413365	0.279192	0.0479358	0.208565	0.0393074	0.22879	0.449471	0.538653	0.437829	0.331618	0.43693	0.505297	0.412889	0.371316	0.153423	0.415277	0.445255	0.606813	0.302691	0.649159	0.695581	0.452744					0.0995574	0.270935	0.353147
	386-406 p2	HT7	0.158233	0.442705	-0.106026	0.420416	0.117097	0.818152	0.173787	0.726799	0.781591	0.875995	0.716552	0.711753	0.870574	0.751526	0.65994	0.662016	0.787692	0.881347	0.742542	0.655032	0.0912964	0.177655	0.121549	0.571737	0.772922	0.803963	0.770341	0.726652	0.789697	0.799258	0.7858	0.750141	0.500643	0.696044	0.715403	0.788908	0.679582	0.852927	0.814096	0.779304					0.510463	0.643286	0.598831
		77G7	0.102829	0.593459	-0.090027	0.365002	0.0548881	0.941746	-0.0154199	0.6953	0.716679	0.912543	0.696258	0.621459	0.850387	0.883264	0.689771	0.536588	0.734301	0.939064	0.71533	0.595406	0.049491	0.0769323	0.18323	0.527512	0.643842	0.652982	0.726096	0.605238	0.70284	0.678617	0.74694	0.646079	0.339482	0.73096	0.77676	0.862574	0.595098	0.829816	0.925419	0.743112					0.326242	0.630045	0.599118
		TauAB	0.198684	0.654386	-0.0285205	0.336246	0.150476	0.883871	-0.0207928	0.628672	0.654876	0.860636	0.607044	0.574229	0.803325	0.809498	0.636251	0.53961	0.67944	0.893553	0.659198	0.533623	0.0877018	0.201466	0.149654	0.471504	0.643499	0.714876	0.672615	0.583339	0.668037	0.715025	0.681465	0.622958	0.338656	0.624617	0.653553	0.782736	0.557185	0.814787	0.826414	0.685153					0.325404	0.548249	0.555055
	386-406 p3	HT7	0.304493	0.520388	-0.0526625	0.0151467	0.415337	0.525687	-0.126427	0.160642	0.283233	0.40685	0.11953	0.208151	0.38531	0.309986	0.164523	0.184195	0.332166	0.463186	0.20773	0.132803	0.166888	0.429979	-0.107731	0.120422	0.493684	0.589905	0.261919	0.303301	0.369459	0.487024	0.206256	0.297276	0.299072	0.116079	0.124106	0.295851	0.213074	0.480096	0.347421	0.28044					0.235573	0.0227724	0.129987
		77G7	0.062403	0.620114	-0.0398419	0.326146	-0.0500023	0.910009	0.0448359	0.65903	0.622623	0.866683	0.639259	0.533533	0.795964	0.882565	0.693388	0.502317	0.627098	0.903164	0.645853	0.545279	-0.0087862	0.0166804	0.203488	0.460526	0.481361	0.524789	0.634668	0.487258	0.575385	0.572809	0.689524	0.54721	0.214058	0.658384	0.7239	0.81034	0.523052	0.730092	0.920284	0.660581					0.164794	0.608988	0.600262
		TauAB	0.517173	0.371472	0.35776	0.782322	0.191024	0.473483	0.136555	0.809704	0.808842	0.765321	0.785531	0.881604	0.764071	0.489363	0.761738	0.925139	0.831391	0.712945	0.877984	0.832572	0.381871	0.429184	0.480469	0.770815	0.83594	0.950447	0.887876	0.91103	0.857848	0.956683	0.828413	0.927629	0.635688	0.743808	0.661822	0.691194	0.864242	0.869826	0.403795	0.842349					0.834106	0.735606	0.821557
	407-438 p1	HT7	0.0779705	0.600359	-0.0885833	0.172074	0.0603805	0.702486	-0.209218	0.427884	0.458614	0.696932	0.419285	0.358558	0.609592	0.808076	0.498743	0.349905	0.478462	0.709169	0.492523	0.277401	-0.00927528	0.111508	0.0406133	0.277737	0.483789	0.577642	0.498661	0.388338	0.513165	0.585633	0.458682	0.428328	0.221625	0.52787	0.447	0.587133	0.304197	0.705263	0.610499	0.465097					0.188042	0.401583	0.310386
		77G7	0.211816	0.452482	-0.00275238	0.50387	-0.0405914	0.80647	0.0549049	0.726614	0.786866	0.841866	0.703208	0.690035	0.876995	0.721813	0.544247	0.622203	0.774538	0.851476	0.72428	0.628226	0.235521	0.265761	0.2571	0.651784	0.777088	0.759679	0.723203	0.711976	0.807491	0.793875	0.713499	0.721457	0.593754	0.654334	0.68373	0.782559	0.669695	0.824793	0.816073	0.754001					0.515816	0.655189	0.567317
		TauAB	0.323092	0.432422	0.0429995	0.438444	0.117139	0.67194	-0.304188	0.525215	0.667725	0.664624	0.533286	0.567677	0.675876	0.54425	0.347237	0.411975	0.69405	0.669101	0.591529	0.466561	0.390032	0.396152	0.268706	0.578153	0.798596	0.727526	0.616253	0.646242	0.760802	0.723792	0.504511	0.619388	0.642278	0.560933	0.529277	0.631624	0.536701	0.761978	0.560968	0.624375					0.597344	0.43456	0.387639
	407-438 p2	HT7	-0.110038	0.63157	-0.231369	-0.246477	0.165196	0.619158	-0.218788	0.0666136	0.056432	0.43008	0.0562168	-0.050106	0.291419	0.647118	0.270219	-0.0400252	0.0930942	0.497111	0.107223	-0.0753795	-0.269066	-0.0855522	-0.22268	-0.140763	0.0479723	0.168555	0.115887	-0.0553813	0.0631555	0.147285	0.141934	0.00441479	-0.245497	0.178094	0.193399	0.357339	-0.0720847	0.335779	0.502073	0.113539					-0.311893	0.0513527	0.0285417
		77G7	0.242748	0.501033	0.0100945	0.473362	0.0165653	0.806856	-0.0680291	0.70445	0.777256	0.86547	0.695358	0.684995	0.822943	0.802074	0.69189	0.605621	0.792641	0.858557	0.736041	0.629692	0.231266	0.257414	0.262783	0.606912	0.793835	0.809847	0.765484	0.720444	0.81499	0.812123	0.742353	0.737344	0.612097	0.752546	0.681868	0.732749	0.639151	0.900887	0.77228	0.746385					0.578789	0.599057	0.608331
		TauAB	0.337722	0.539366	0.0894842	0.472471	0.0453966	0.79501	-0.328645	0.586479	0.704727	0.749587	0.584068	0.587774	0.739767	0.650631	0.437918	0.426657	0.730492	0.767957	0.631565	0.518622	0.410278	0.389178	0.351337	0.621273	0.78418	0.712043	0.647318	0.646309	0.773629	0.724911	0.58821	0.632222	0.636829	0.617662	0.606587	0.707779	0.567745	0.804273	0.759323	0.667515					0.550959	0.480477	0.479348
	407-438 p3	HT7	0.204036	0.224345	-0.0996139	-0.154632	0.252005	0.162962	-0.346933	-0.170211	0.0164063	0.0121807	-0.191164	-0.0923205	0.0391689	-0.00241707	-0.262201	-0.17076	0.0470169	0.0503092	-0.121041	-0.203971	0.230596	0.413568	-0.179251	-0.0664437	0.308873	0.302167	-0.0714197	0.0436168	0.149916	0.206177	-0.228381	-0.00753679	0.311364	-0.162313	-0.219068	-0.0763871	-0.104233	0.167643	-0.0557026	-0.0610479					0.153581	-0.272113	-0.264484
		77G7	0.206693	0.443061	0.023262	0.591195	-0.0702424	0.89352	0.168414	0.841664	0.870906	0.91741	0.820827	0.788217	0.959521	0.738416	0.636995	0.698296	0.855059	0.935715	0.809745	0.770554	0.239108	0.209941	0.345265	0.751357	0.781153	0.729005	0.801755	0.771572	0.842583	0.782841	0.824961	0.788407	0.582869	0.730403	0.835122	0.900917	0.788706	0.833185	0.941997	0.860115					0.52236	0.763321	0.713966
		TauAB	0.379927	0.327794	0.190453	0.703347	0.137123	0.536894	0.114056	0.81248	0.842655	0.81472	0.809702	0.873266	0.800224	0.612461	0.783079	0.876816	0.860206	0.754374	0.885501	0.802272	0.286301	0.316933	0.374809	0.737735	0.869013	0.949794	0.909456	0.907378	0.895257	0.953918	0.856137	0.922644	0.655875	0.81937	0.703504	0.714122	0.824598	0.920173	0.484526	0.849953					0.826908	0.745882	0.758677
			Tau12	HT7	77G7	TauAB	Tau12	HT7	77G7	TauAB	Tau12	HT7	77G7	TauAB	Tau12	HT7	77G7	TauAB	Tau12	HT7	77G7	TauAB	Tau12	HT7	77G7	TauAB	Tau12	HT7	77G7	TauAB	Tau12	HT7	77G7	TauAB	Tau12	HT7	77G7	TauAB	Tau12	HT7	77G7	TauAB	Tau12	HT7	77G7	TauAB	Tau12	HT7	77G7
			175-190 p1				210-224 p1				210-224 p2				210-224 p3				212-224 p1				225-240 p1				225-240 p2				225-240p3				386-406 p1				386-406 p2				386-406 p3				407-438 p1
			TBS
[truncated: 51 more columns]

## Sheet: c) PSP
c)
			TBS
			175-190 p1				210-224 p1				210-224 p2				210-224 p3				212-224 p1				225-240 p1				225-240 p2				225-240p3				386-406 p1				386-406 p2				386-406 p3				407-438 p1
		PSP	Tau12	HT7	77G7	TauAB	Tau12	HT7	77G7	TauAB	Tau12	HT7	77G7	TauAB	Tau12	HT7	77G7	TauAB	Tau12	HT7	77G7	TauAB	Tau12	HT7	77G7	TauAB	Tau12	HT7	77G7	TauAB	Tau12	HT7	77G7	TauAB	Tau12	HT7	77G7	TauAB	Tau12	HT7	77G7	TauAB	Tau12	HT7	77G7	TauAB	Tau12	HT7	77G7
TBS	175-190 p1	Tau12	1	0.846478	0.915887	0.851932	0.608862	0.752499	0.519315	0.0721069	0.296169	0.374557	0.0436494	0.251055					0.825597	0.615566	0.821587	0.458131	0.928577	0.795295	0.908915	0.659592	0.492015	0.399034	0.547679	0.3933	0.387652	0.321711	0.315247	0.416858	0.144264	0.238499	0.320159	0.354064	0.24829	0.0929546	0.545754	0.00257292					0.454941		0.404709
		HT7	0.846478	1	0.72511	0.706434	0.453822	0.819521	0.356271	-0.125169	0.690536	0.777749	-0.167806	0.553217					0.935197	0.900411	0.863862	0.803821	0.82322	0.918926	0.809102	0.693373	0.789221	0.763904	0.812806	0.688059	0.625365	0.399582	0.305774	0.608934	0.304797	0.534244	0.636261	0.718306	0.379204	-0.168098	0.785725	-0.00662191					0.314756		0.215974
		77G7	0.915887	0.72511	1	0.941626	0.757948	0.740233	0.76767	0.0650056	0.216244	0.243373	-0.0126181	0.176274					0.751359	0.497153	0.813963	0.300687	0.797378	0.644133	0.901997	0.653401	0.361771	0.269241	0.425872	0.255906	0.116231	0.0446966	0.207231	0.248444	0.0879693	0.191049	0.248344	0.167563	0.200774	-0.0177426	0.604114	0.0694027					0.57707		0.534936
		TauAB	0.851932	0.706434	0.941626	1	0.795269	0.791411	0.756583	0.0287907	0.346743	0.347281	0.0987586	0.352875					0.793761	0.558112	0.863883	0.381729	0.829929	0.737936	0.9519	0.84461	0.528753	0.418979	0.596975	0.432398	0.159194	0.0670449	0.442113	0.329488	0.202076	0.350977	0.387737	0.271432	0.118508	-0.0198674	0.605134	0.0909526					0.581784		0.61112
	210-224 p1	Tau12	0.608862	0.453822	0.757948	0.795269	1	0.687599	0.778657	0.462813	0.216543	0.239532	0.420961	0.251509					0.596531	0.39861	0.693057	0.203972	0.631775	0.490513	0.800968	0.652677	0.325116	0.242438	0.391754	0.175883	-0.0895929	-0.24864	0.195378	0.0813432	0.521549	0.436939	0.491054	0.0920094	0.12473	-0.189677	0.581592	-0.200445					0.829629		0.788156
		HT7	0.752499	0.819521	0.740233	0.791411	0.687599	1	0.592371	0.102894	0.548933	0.677817	0.0302272	0.514487					0.944971	0.847387	0.953863	0.667002	0.785558	0.789916	0.85464	0.724725	0.752642	0.700539	0.799385	0.506699	0.338188	0.0577903	0.251636	0.51405	0.534813	0.680802	0.740626	0.568847	0.3672	-0.0561947	0.806284	0.253726					0.636397		0.63356
		77G7	0.519315	0.356271	0.76767	0.756583	0.778657	0.592371	1	-0.0109726	-0.00140519	0.0618752	-0.0604414	0.13811					0.435778	0.219506	0.528738	0.0619461	0.408699	0.255204	0.639558	0.487288	0.135791	0.0744219	0.186005	0.0782294	-0.231197	-0.285568	0.0127604	0.0885145	0.0806814	0.169181	0.189892	-0.0641512	-0.113784	-0.21368	0.593221	0.0681468					0.632316		0.577653
		TauAB	0.0721069	-0.125169	0.0650056	0.0287907	0.462813	0.102894	-0.0109726	1	-0.215758	-0.148134	0.795943	-0.187534					0.0584221	-0.00255968	0.119122	-0.228139	0.151923	-0.0332835	0.140357	-0.0160483	-0.139253	-0.174345	-0.112334	-0.327276	-0.242434	-0.384944	-0.113197	-0.279109	0.54987	0.102554	0.109419	-0.248166	0.37654	0.0871338	-0.0778911	-0.146497					0.446545		0.477283
	210-224 p2	Tau12	0.296169	0.690536	0.216244	0.346743	0.216543	0.548933	-0.00140519	-0.215758	1	0.914209	-0.178112	0.79843					0.678686	0.80747	0.616961	0.901291	0.450778	0.750704	0.457788	0.609828	0.887998	0.908841	0.859209	0.822601	0.684209	0.401836	0.290957	0.599693	0.555961	0.829837	0.821337	0.890872	0.231558	-0.199766	0.747839	-0.111408					0.233071		0.173171
		HT7	0.374557	0.777749	0.243373	0.347281	0.239532	0.677817	0.0618752	-0.148134	0.914209	1	-0.172022	0.848444					0.771384	0.928759	0.667258	0.964918	0.48775	0.784061	0.479585	0.59546	0.939144	0.979272	0.905725	0.849165	0.740393	0.400759	0.246782	0.738104	0.598896	0.847738	0.889407	0.948132	0.389129	-0.22817	0.73721	0.0034769					0.194219		0.126093
		77G7	0.0436494	-0.167806	-0.0126181	0.0987586	0.420961	0.0302272	-0.0604414	0.795943	-0.178112	-0.172022	1	-0.131533					0.000803428	-0.0757172	0.0463214	-0.268738	0.246823	0.0935208	0.209449	0.249458	-0.0393617	-0.128562	0.031422	-0.118854	-0.240273	-0.266513	0.430986	-0.309213	0.427121	0.0600548	0.107676	-0.252646	-0.00752393	-0.0121099	-0.250424	-0.335247					0.276863		0.384762
		TauAB	0.251055	0.553217	0.176274	0.352875	0.251509	0.514487	0.13811	-0.187534	0.79843	0.848444	-0.131533	1					0.593478	0.71117	0.515203	0.872218	0.417084	0.66747	0.428882	0.660188	0.871956	0.886403	0.790545	0.916856	0.773924	0.548442	0.259341	0.872952	0.603884	0.843554	0.745757	0.891168	0.0854943	0.0234094	0.630914	-0.0271865					0.23173		0.213169
	210-224 p3	Tau12
		HT7
		77G7
		TauAB
	212-224 p1	Tau12	0.825597	0.935197	0.751359	0.793761	0.596531	0.944971	0.435778	0.0584221	0.678686	0.771384	0.000803428	0.593478					1	0.932455	0.975735	0.776644	0.860155	0.921784	0.88124	0.784301	0.843736	0.795354	0.875118	0.65469	0.52991	0.249272	0.337934	0.601881	0.491527	0.667911	0.724664	0.690204	0.442146	-0.0500086	0.813546	0.172205					0.494734		0.479775
		HT7	0.615566	0.900411	0.497153	0.558112	0.39861	0.847387	0.219506	-0.00255968	0.80747	0.928759	-0.0757172	0.71117					0.932455	1	0.854841	0.890985	0.680157	0.877578	0.680084	0.682506	0.919333	0.924004	0.9204	0.755615	0.641109	0.285388	0.286244	0.667239	0.555918	0.758013	0.823643	0.835443	0.522701	-0.185072	0.797466	0.147836					0.303451		0.266057
		77G7	0.821587	0.863862	0.813963	0.863883	0.693057	0.953863	0.528738	0.119122	0.616961	0.667258	0.0463214	0.515203					0.975735	0.854841	1	0.67428	0.849608	0.863905	0.91255	0.790222	0.770007	0.704357	0.815401	0.547379	0.387866	0.123509	0.318288	0.496227	0.489798	0.642264	0.682729	0.575342	0.428048	-0.00668548	0.806212	0.21995					0.604952		0.618011
		TauAB	0.458131	0.803821	0.300687	0.381729	0.203972	0.667002	0.0619461	-0.228139	0.901291	0.964918	-0.268738	0.872218					0.776644	0.890985	0.67428	1	0.559698	0.80739	0.515238	0.586725	0.931127	0.956687	0.880595	0.867901	0.855539	0.58557	0.196471	0.847929	0.554532	0.830104	0.824618	0.987323	0.305277	-0.025547	0.72899	0.00856501					0.233259		0.15521
	225-240 p1	Tau12	0.928577	0.82322	0.797378	0.829929	0.631775	0.785558	0.408699	0.151923	0.450778	0.48775	0.246823	0.417084					0.860155	0.680157	0.849608	0.559698	1	0.898297	0.946461	0.80448	0.657225	0.543647	0.7086	0.549937	0.495179	0.401403	0.493218	0.492912	0.378897	0.452129	0.489152	0.487073	0.132084	0.15006	0.5797	-0.0817172					0.533463		0.525688
		HT7	0.795295	0.918926	0.644133	0.737936	0.490513	0.789916	0.255204	-0.0332835	0.750704	0.784061	0.0935208	0.66747					0.921784	0.877578	0.863905	0.80739	0.898297	1	0.858727	0.868826	0.890749	0.827089	0.918674	0.81284	0.676199	0.476483	0.574598	0.643534	0.43991	0.637445	0.69749	0.757109	0.25644	-0.0535052	0.680276	-0.0718382					0.335683		0.321944
		77G7	0.908915	0.809102	0.901997	0.9519	0.800968	0.85464	0.639558	0.140357	0.457788	0.479585	0.209449	0.428882					0.88124	0.680084	0.91255	0.515238	0.946461	0.858727	1	0.871564	0.641244	0.532019	0.704364	0.519411	0.322863	0.188774	0.461842	0.413126	0.381561	0.482951	0.528562	0.414183	0.142857	-0.0088303	0.67831	-0.0416087					0.640186		0.631935
		TauAB	0.659592	0.693373	0.653401	0.84461	0.652677	0.724725	0.487288	-0.0160483	0.609828	0.59546	0.249458	0.660188					0.784301	0.682506	0.790222	0.586725	0.80448	0.868826	0.871564	1	0.789484	0.69187	0.831093	0.767334	0.404868	0.25721	0.71309	0.504657	0.408582	0.591265	0.601798	0.537666	0.00568655	-0.105903	0.590406	-0.0633558					0.417707		0.479895
	225-240 p2	Tau12	0.492015	0.789221	0.361771	0.528753	0.325116	0.752642	0.135791	-0.139253	0.887998	0.939144	-0.0393617	0.871956					0.843736	0.919333	0.770007	0.931127	0.657225	0.890749	0.641244	0.789484	1	0.984359	0.984807	0.911635	0.739405	0.455292	0.468551	0.773666	0.589111	0.848543	0.849578	0.917811	0.271794	-0.0582076	0.69629	0.0846985					0.26542		0.281673
		HT7	0.399034	0.763904	0.269241	0.418979	0.242438	0.700539	0.0744219	-0.174345	0.908841	0.979272	-0.128562	0.886403					0.795354	0.924004	0.704357	0.956687	0.543647	0.827089	0.532019	0.69187	0.984359	1	0.954	0.902391	0.753695	0.439653	0.367592	0.781169	0.583983	0.854226	0.864236	0.948901	0.334318	-0.124291	0.695701	0.0904228					0.190351		0.181043
		77G7	0.547679	0.812806	0.425872	0.596975	0.391754	0.799385	0.186005	-0.112334	0.859209	0.905725	0.031422	0.790545					0.875118	0.9204	0.815401	0.880595	0.7086	0.918674	0.704364	0.831093	0.984807	0.954	1	0.86668	0.649045	0.369829	0.55687	0.680287	0.557817	0.809204	0.853889	0.854174	0.27591	-0.122065	0.697324	0.0745716					0.291031		0.319193
		TauAB	0.3933	0.688059	0.255906	0.432398	0.175883	0.506699	0.0782294	-0.327276	0.822601	0.849165	-0.118854	0.916856					0.65469	0.755615	0.547379	0.867901	0.549937	0.81284	0.519411	0.767334	0.911635	0.902391	0.86668	1	0.810902	0.635693	0.523961	0.818162	0.393729	0.693965	0.665307	0.882724	0.0329207	-0.0886461	0.568104	-0.097027					0.0460945		0.03531
	225-240p3	Tau12	0.387652	0.625365	0.116231	0.159194	-0.0895929	0.338188	-0.231197	-0.242434	0.684209	0.740393	-0.240273	0.773924					0.52991	0.641109	0.387866	0.855539	0.495179	0.676199	0.322863	0.404868	0.739405	0.753695	0.649045	0.810902	1	0.893446	0.172091	0.892644	0.367323	0.573224	0.497771	0.89464	0.141538	0.27826	0.391536	-0.0875861					-0.0122012		-0.0802191
		HT7	0.321711	0.399582	0.0446966	0.0670449	-0.24864	0.0577903	-0.285568	-0.384944	0.401836	0.400759	-0.266513	0.548442					0.249272	0.285388	0.123509	0.58557	0.401403	0.476483	0.188774	0.25721	0.455292	0.439653	0.369829	0.635693	0.893446	1	0.198211	0.760013	0.058031	0.252443	0.153011	0.646174	-0.17373	0.454409	0.0909784	-0.185269					-0.147568		-0.202655
		77G7	0.315247	0.305774	0.207231	0.442113	0.195378	0.251636	0.0127604	-0.113197	0.290957	0.246782	0.430986	0.259341					0.337934	0.286244	0.318288	0.196471	0.493218	0.574598	0.461842	0.71309	0.468551	0.367592	0.55687	0.523961	0.172091	0.198211	1	0.126922	0.011299	0.141087	0.252289	0.215363	-0.161948	-0.157787	-0.0399517	-0.14115					-0.126291		0.0306834
		TauAB	0.416858	0.608934	0.248444	0.329488	0.0813432	0.51405	0.0885145	-0.279109	0.599693	0.738104	-0.309213	0.872952					0.601881	0.667239	0.496227	0.847929	0.492912	0.643534	0.413126	0.504657	0.773666	0.781169	0.680287	0.818162	0.892644	0.760013	0.126922	1	0.400234	0.649861	0.544851	0.866461	0.130033	0.319535	0.479603	0.158066					0.134217		0.112393
	386-406 p1	Tau12	0.144264	0.304797	0.0879693	0.202076	0.521549	0.534813	0.0806814	0.54987	0.555961	0.598896	0.427121	0.603884					0.491527	0.555918	0.489798	0.554532	0.378897	0.43991	0.381561	0.408582	0.589111	0.583983	0.557817	0.393729	0.367323	0.058031	0.011299	0.400234	1	0.874045	0.80484	0.551541	0.258739	0.0559385	0.527982	-0.144376					0.66356		0.641052
		HT7	0.238499	0.534244	0.191049	0.350977	0.436939	0.680802	0.169181	0.102554	0.829837	0.847738	0.0600548	0.843554					0.667911	0.758013	0.642264	0.830104	0.452129	0.637445	0.482951	0.591265	0.848543	0.854226	0.809204	0.693965	0.573224	0.252443	0.141087	0.649861	0.874045	1	0.933354	0.821326	0.206197	-0.00884896	0.728826	-0.0127669					0.558458		0.534173
		77G7	0.320159	0.636261	0.248344	0.387737	0.491054	0.740626	0.189892	0.109419	0.821337	0.889407	0.107676	0.745757					0.724664	0.823643	0.682729	0.824618	0.489152	0.69749	0.528562	0.601798	0.849578	0.864236	0.853889	0.665307	0.497771	0.153011	0.252289	0.544851	0.80484	0.933354	1	0.795716	0.323437	-0.245143	0.724188	-0.0989703					0.484466		0.432188
		TauAB	0.354064	0.718306	0.167563	0.271432	0.0920094	0.568847	-0.0641512	-0.248166	0.890872	0.948132	-0.252646	0.891168					0.690204	0.835443	0.575342	0.987323	0.487073	0.757109	0.414183	0.537666	0.917811	0.948901	0.854174	0.882724	0.89464	0.646174	0.215363	0.866461	0.551541	0.821326	0.795716	1	0.26086	0.0292354	0.629534	-0.00032776					0.144015		0.0846913
	386-406 p2	Tau12	0.24829	0.379204	0.200774	0.118508	0.12473	0.3672	-0.113784	0.37654	0.231558	0.389129	-0.00752393	0.0854943					0.442146	0.522701	0.428048	0.305277	0.132084	0.25644	0.142857	0.00568655	0.271794	0.334318	0.27591	0.0329207	0.141538	-0.17373	-0.161948	0.130033	0.258739	0.206197	0.323437	0.26086	1	-0.0808346	0.199926	0.395037					-0.0032954		0.0195848
		HT7	0.0929546	-0.168098	-0.0177426	-0.0198674	-0.189677	-0.0561947	-0.21368	0.0871338	-0.199766	-0.22817	-0.0121099	0.0234094					-0.0500086	-0.185072	-0.00668548	-0.025547	0.15006	-0.0535052	-0.0088303	-0.105903	-0.0582076	-0.124291	-0.122065	-0.0886461	0.27826	0.454409	-0.157787	0.319535	0.0559385	-0.00884896	-0.245143	0.0292354	-0.0808346	1	-0.292646	0.375854					0.144056		0.282951
		77G7	0.545754	0.785725	0.604114	0.605134	0.581592	0.806284	0.593221	-0.0778911	0.747839	0.73721	-0.250424	0.630914					0.813546	0.797466	0.806212	0.72899	0.5797	0.680276	0.67831	0.590406	0.69629	0.695701	0.697324	0.568104	0.391536	0.0909784	-0.0399517	0.479603	0.527982	0.728826	0.724188	0.629534	0.199926	-0.292646	1	-0.0301843					0.618592		0.476426
		TauAB	0.00257292	-0.00662191	0.0694027	0.0909526	-0.200445	0.253726	0.0681468	-0.146497	-0.111408	0.0034769	-0.335247	-0.0271865					0.172205	0.147836	0.21995	0.00856501	-0.0817172	-0.0718382	-0.0416087	-0.0633558	0.0846985	0.0904228	0.0745716	-0.097027	-0.0875861	-0.185269	-0.14115	0.158066	-0.144376	-0.0127669	-0.0989703	-0.00032776	0.395037	0.375854	-0.0301843	1					-0.0990501		0.11093
	386-406 p3	Tau12
		HT7
		77G7
		TauAB
	407-438 p1	Tau12	0.454941	0.314756	0.57707	0.581784	0.829629	0.636397	0.632316	0.446545	0.233071	0.194219	0.276863	0.23173					0.494734	0.303451	0.604952	0.233259	0.533463	0.335683	0.640186	0.417707	0.26542	0.190351	0.291031	0.0460945	-0.0122012	-0.147568	-0.126291	0.134217	0.66356	0.558458	0.484466	0.144015	-0.0032954	0.144056	0.618592	-0.0990501					1		0.941379
		HT7
		77G7	0.404709	0.215974	0.534936	0.61112	0.788156	0.63356	0.577653	0.477283	0.173171	0.126093	0.384762	0.213169					0.479775	0.266057	0.618011	0.15521	0.525688	0.321944	0.631935	0.479895	0.281673	0.181043	0.319193	0.03531	-0.0802191	-0.202655	0.0306834	0.112393	0.641052	0.534173	0.432188	0.0846913	0.0195848	0.282951	0.476426	0.11093					0.941379		1
		TauAB	0.358979	0.0694866	0.518818	0.477268	0.762627	0.412577	0.619794	0.512326	-0.0906288	-0.153445	0.348736	-0.0757693					0.243238	-0.00892573	0.386492	-0.101303	0.391647	0.0816308	0.496269	0.217669	-0.0626228	-0.153885	-0.021931	-0.251131	-0.264419	-0.280456	-0.20637	-0.126016	0.450395	0.251692	0.172991	-0.188766	-0.13003	0.212978	0.364796	-0.121306					0.938261		0.894964
	407-438 p2	Tau12
		HT7
		77G7
		TauAB
	407-438 p3	Tau12
		HT7
		77G7
		TauAB
SI	175-190 p1	HT7	0.679536	0.850219	0.537163	0.641187	0.348915	0.686878	0.161331	-0.0308388	0.692017	0.766769	0.0857192	0.660894					0.85734	0.874778	0.776485	0.743643	0.76457	0.930258	0.732672	0.827312	0.863951	0.82204	0.875735	0.828287	0.644068	0.404732	0.590041	0.62235	0.341281	0.534391	0.583106	0.708263	0.367209	-0.128905	0.57283	0.0672481					0.10432		0.134715
		77G7	0.714794	0.652613	0.688587	0.847763	0.534174	0.69201	0.400538	0.00660639	0.497362	0.473559	0.187668	0.573076					0.778544	0.626831	0.804101	0.521534	0.83007	0.82858	0.851323	0.921914	0.722308	0.6068	0.747949	0.674936	0.440311	0.337469	0.629776	0.54429	0.311912	0.479576	0.417264	0.479933	0.0954631	0.212932	0.479201	0.189792					0.379753		0.507169
		TauAB	0.532812	0.673498	0.454857	0.649157	0.399032	0.564726	0.247604	-0.181595	0.733492	0.713602	0.0567151	0.856582					0.700042	0.690182	0.652006	0.750656	0.693288	0.855355	0.698598	0.909503	0.862638	0.8032	0.84117	0.937304	0.693134	0.563607	0.622437	0.739856	0.406517	0.65178	0.600353	0.745812	-0.0095297	0.0168271	0.554015	-0.104204					0.225191		0.259813
	210-224 p1	HT7	0.89794	0.824352	0.891336	0.83609	0.493905	0.64242	0.464169	-0.111651	0.447399	0.405886	-0.192104	0.323838					0.782904	0.602057	0.799776	0.50409	0.802399	0.761014	0.827858	0.646366	0.510763	0.438539	0.53579	0.458937	0.424801	0.350217	0.237601	0.426585	0.0452734	0.2416	0.253542	0.4043	0.275642	0.0926921	0.615525	0.0774765					0.361899		0.318343
		77G7	0.674144	0.724715	0.538597	0.528857	0.475852	0.820012	0.184565	0.388207	0.422099	0.619983	0.177243	0.372095					0.842567	0.8093	0.819061	0.598532	0.680416	0.695586	0.644945	0.46739	0.638676	0.617899	0.669085	0.354237	0.408453	0.101286	0.14686	0.465872	0.551982	0.54527	0.641448	0.533676	0.74715	0.0940297	0.527744	0.306765					0.40696		0.432493
		TauAB	0.662964	0.687324	0.594494	0.716568	0.579899	0.695299	0.349556	0.0782391	0.675518	0.628353	0.147632	0.753025					0.776474	0.676964	0.774144	0.716728	0.833994	0.840186	0.819047	0.842758	0.790125	0.702832	0.768362	0.746689	0.653202	0.514937	0.374319	0.695517	0.613398	0.737965	0.620347	0.684207	0.00103563	0.254898	0.672775	-0.0929775					0.607176		0.608724
	210-224 p2	HT7	0.316214	0.704663	0.122844	0.279679	0.12647	0.544542	-0.118618	-0.138531	0.886476	0.93806	0.00871312	0.808078					0.687722	0.85963	0.563938	0.88745	0.499245	0.80766	0.43711	0.64866	0.93296	0.950052	0.912981	0.900139	0.752594	0.465447	0.49185	0.669135	0.53249	0.756058	0.804133	0.90206	0.273815	-0.233108	0.56433	-0.0906013					0.0231596		0.00562244
		77G7	0.244784	0.690619	0.0919476	0.200842	0.103718	0.57499	-0.0686935	-0.172881	0.914674	0.983059	-0.189111	0.837499					0.676721	0.876534	0.557431	0.945591	0.387923	0.707893	0.352585	0.504847	0.907825	0.960067	0.859394	0.834109	0.758282	0.42388	0.203959	0.719481	0.598267	0.839119	0.852225	0.949605	0.335127	-0.208415	0.686195	-0.00277184					0.117541		0.0504163
		TauAB	0.36751	0.680097	0.168966	0.334783	0.0727393	0.435626	-0.0949838	-0.293931	0.831031	0.842639	-0.0607837	0.847086					0.620102	0.746288	0.493672	0.85493	0.542548	0.817771	0.460721	0.706902	0.894209	0.887495	0.856762	0.976569	0.841282	0.67288	0.568057	0.758995	0.374472	0.646543	0.643361	0.882926	0.0674198	-0.0954294	0.480099	-0.15618					-0.0494534		-0.0612027
	210-224 p3	HT7	0.325531	0.503185	-0.0158171	-0.0432259	-0.137518	0.190813	-0.434382	0.0766806	0.477044	0.593442	-0.00107643	0.537401					0.394243	0.527847	0.235764	0.675755	0.413472	0.538188	0.180337	0.178649	0.536068	0.56441	0.457543	0.572502	0.895216	0.785162	0.0743162	0.694014	0.392408	0.409455	0.397542	0.723343	0.314096	0.258411	0.171482	-0.205943					-0.0866362		-0.175158
		77G7	0.0866658	0.0237617	-0.146436	-0.234928	-0.504542	-0.333888	-0.457791	-0.319946	0.01506	-0.105084	-0.263519	0.00608126					-0.157219	-0.172081	-0.240182	0.100521	0.119667	0.0475501	-0.128539	-0.177161	-0.0585958	-0.0833487	-0.131302	0.125409	0.526798	0.778336	-0.0703198	0.275017	-0.250121	-0.190326	-0.340498	0.165335	-0.372138	0.55265	-0.189682	-0.201486					-0.242307		-0.306296
		TauAB	-0.0122935	-0.109871	-0.18254	-0.248775	-0.434417	-0.500097	-0.359335	-0.292993	-0.127221	-0.181351	-0.216228	0.0975662					-0.314359	-0.307071	-0.403374	0.00241187	-0.0305205	-0.0683478	-0.213867	-0.166018	-0.161335	-0.164085	-0.260192	0.163992	0.477556	0.765452	-0.0602043	0.314991	-0.322181	-0.293379	-0.428193	0.0790187	-0.386173	0.436087	-0.339979	-0.338218					-0.373505		-0.447386
	212-224 p1	HT7	0.444972	0.739076	0.199605	0.278456	0.139534	0.501386	-0.180039	0.0734094	0.725744	0.843933	0.126954	0.676311					0.696482	0.845759	0.556783	0.796575	0.564127	0.809264	0.45706	0.576245	0.824977	0.840043	0.80601	0.795887	0.758869	0.478499	0.440486	0.627695	0.474754	0.585868	0.666351	0.802416	0.47046	-0.18155	0.44763	-0.108203					-0.045258		-0.0735879
		77G7	0.281967	0.626361	0.0538461	0.109509	-0.146078	0.324746	-0.269149	-0.333437	0.825269	0.804075	-0.331261	0.768844					0.524768	0.679036	0.389956	0.886194	0.408171	0.660367	0.268069	0.389113	0.774413	0.805149	0.68848	0.822076	0.946835	0.788735	0.151144	0.796558	0.368518	0.628705	0.547794	0.920725	0.133816	0.129308	0.509949	-0.0794165					-0.0286466		-0.107863
		TauAB	-0.0610901	-0.0567464	-0.21656	-0.329393	-0.0248715	-0.160026	-0.397116	0.712633	-0.200835	-0.0279321	0.516398	-0.220412					-0.0750074	0.0465312	-0.149652	-0.144705	-0.0737873	-0.079906	-0.180377	-0.266979	-0.164346	-0.115764	-0.164658	-0.22089	-0.033087	-0.182154	-0.129111	-0.217749	0.220564	-0.139862	-0.0208514	-0.130466	0.535281	-0.18969	-0.245944	-0.218565					-0.178061		-0.225084
	225-240 p1	HT7	0.369608	0.685379	0.206642	0.384699	0.211693	0.503427	-0.0460397	-0.0877945	0.81766	0.846028	0.139124	0.77568					0.672916	0.803792	0.563355	0.784198	0.555134	0.834618	0.51437	0.762271	0.893059	0.883305	0.886082	0.914474	0.680561	0.429897	0.636538	0.599204	0.459702	0.657041	0.703384	0.794207	0.207925	-0.27584	0.509771	-0.155477					-0.000377254		0.00907766
		77G7	0.311038	0.644401	0.126625	0.304271	0.144374	0.493314	-0.119391	-0.10217	0.875136	0.8582	0.0929264	0.813327					0.649643	0.785189	0.542603	0.834701	0.547697	0.807128	0.471056	0.703471	0.910938	0.898493	0.882432	0.909321	0.759694	0.518452	0.527672	0.654048	0.560943	0.756398	0.729912	0.858577	0.107376	-0.115549	0.560144	-0.143628					0.0990137		0.0999183
		TauAB	0.213318	0.526146	0.0952129	0.301747	0.116639	0.302003	-0.0548326	-0.237798	0.755896	0.737419	0.0681192	0.791796					0.480914	0.624293	0.373526	0.688574	0.39972	0.703067	0.38286	0.722791	0.791121	0.786918	0.764143	0.926985	0.643014	0.474316	0.647939	0.576289	0.324732	0.558343	0.56672	0.719872	-3.33915e-05	-0.294843	0.418338	-0.24637					-0.121374		-0.112727
	225-240 p2	HT7	0.307029	0.696283	0.140535	0.302226	0.117827	0.517824	-0.067485	-0.23601	0.902084	0.94334	-0.0989686	0.887659					0.667059	0.835104	0.545903	0.91898	0.473003	0.793913	0.429153	0.663311	0.939819	0.961702	0.899281	0.954149	0.803637	0.541843	0.450784	0.756067	0.497254	0.765741	0.779771	0.936556	0.219081	-0.186963	0.580716	-0.0839273					0.017253		-0.00830486
		77G7	0.276729	0.680953	0.0849876	0.215155	0.0265989	0.468346	-0.141994	-0.260856	0.906444	0.932731	-0.16977	0.870913					0.629499	0.811388	0.495814	0.932815	0.444033	0.755533	0.367215	0.573312	0.909806	0.939804	0.851933	0.928804	0.861417	0.611823	0.342093	0.775909	0.495162	0.759119	0.740191	0.957138	0.185593	-0.117104	0.591307	-0.0930903					0.0114959		-0.0400317
		TauAB	0.307512	0.625507	0.13323	0.286235	0.0486359	0.353118	-0.0805702	-0.319437	0.797282	0.816343	-0.123534	0.882151					0.545355	0.688246	0.413682	0.836712	0.45828	0.746106	0.392288	0.655984	0.8423	0.851562	0.781394	0.97746	0.853644	0.699163	0.478079	0.791041	0.346283	0.617355	0.590942	0.869803	0.0439378	-0.100322	0.474435	-0.192869					-0.0862159		-0.120682
	225-240p3	HT7	0.351423	0.697678	0.136578	0.253871	0.032509	0.466278	-0.12233	-0.287978	0.858079	0.903155	-0.200401	0.890873					0.632289	0.781625	0.497062	0.945793	0.498282	0.773122	0.400279	0.576946	0.896925	0.917816	0.831051	0.941148	0.932369	0.734626	0.334529	0.864001	0.460069	0.729391	0.702318	0.972905	0.159859	0.00835393	0.541457	-0.100918					0.0207693		-0.0338941
		77G7	0.321506	0.654253	0.0789028	0.176185	-0.0259219	0.4212	-0.199249	-0.256206	0.825615	0.869882	-0.205663	0.860827					0.586586	0.738733	0.447765	0.933764	0.473569	0.726029	0.34343	0.490808	0.854275	0.878374	0.777787	0.889795	0.963186	0.782939	0.254884	0.871796	0.480704	0.720715	0.674171	0.97019	0.156066	0.105727	0.496618	-0.104166					0.0288978		-0.0333558
		TauAB	0.336125	0.491176	0.0858929	0.136917	-0.130857	0.119652	-0.209151	-0.320528	0.508925	0.548904	-0.194944	0.70025					0.33907	0.426117	0.1926	0.673626	0.419501	0.574802	0.255589	0.400111	0.575115	0.576737	0.484341	0.788987	0.923228	0.938375	0.279739	0.812416	0.148535	0.344091	0.274036	0.726112	-0.0678773	0.226399	0.211967	-0.257714					-0.175578		-0.245665
	386-406 p1	HT7	0.34743	0.738523	0.152462	0.266002	0.128512	0.56762	-0.148095	-0.0728009	0.902497	0.961699	-0.0485735	0.796118					0.723159	0.897489	0.604766	0.923829	0.494572	0.799501	0.42757	0.575769	0.923101	0.954706	0.891491	0.850338	0.786399	0.466951	0.351324	0.691469	0.57261	0.775528	0.817482	0.930208	0.42965	-0.170662	0.604063	-0.0349985					0.0625737		0.0281332
		77G7	0.283393	0.683861	0.12574	0.28084	0.138542	0.562024	-0.0905415	-0.157832	0.936671	0.967044	-0.0967137	0.885472					0.692116	0.86213	0.58798	0.943916	0.459755	0.774953	0.418221	0.618447	0.951475	0.978702	0.907073	0.902597	0.793756	0.493171	0.355347	0.748896	0.60068	0.845161	0.840638	0.958872	0.303264	-0.122586	0.624553	-0.0179589					0.111886		0.0918374
		TauAB	0.073514	0.293202	-0.104936	-0.112865	0.0771508	0.12294	-0.34402	0.514204	0.297608	0.459397	0.402699	0.252349					0.271509	0.470436	0.157436	0.319086	0.133186	0.317006	0.0560732	0.118247	0.327458	0.388085	0.312444	0.280129	0.310552	0.0206629	0.122039	0.13921	0.437802	0.264503	0.390228	0.332949	0.631051	-0.351098	0.103527	-0.222351					-0.15432		-0.203084
	386-406 p2	HT7	0.263245	0.657544	0.108843	0.285041	0.154162	0.508686	-0.0849176	-0.141653	0.903103	0.933226	0.00200158	0.867462					0.652832	0.829373	0.540096	0.882339	0.454053	0.778072	0.420218	0.670886	0.930598	0.950829	0.896772	0.92702	0.744805	0.457107	0.471999	0.686009	0.557347	0.785034	0.801781	0.900929	0.239372	-0.234494	0.575433	-0.109385					0.0426976		0.0282341
		77G7	0.231669	0.651603	0.0809888	0.180341	0.0666668	0.475775	-0.143922	-0.140781	0.936287	0.922515	-0.167545	0.826736					0.62921	0.815123	0.519072	0.913251	0.398847	0.698875	0.341922	0.499353	0.870082	0.909864	0.804301	0.832645	0.799734	0.497136	0.175436	0.694295	0.594896	0.810328	0.756584	0.925801	0.266104	-0.112228	0.685404	-0.0691892					0.13141		0.0619889
		TauAB	0.260402	0.549179	0.129285	0.305463	0.1108	0.273268	-0.109898	-0.17354	0.764532	0.701093	0.103014	0.72615					0.490751	0.617478	0.38781	0.663295	0.446786	0.724138	0.40685	0.707003	0.76005	0.746565	0.734765	0.888711	0.652252	0.489635	0.626652	0.517154	0.31656	0.516826	0.510517	0.689692	0.0222035	-0.26169	0.425955	-0.289697					-0.102501		-0.104646
	386-406 p3	HT7	0.309689	0.493661	0.216691	0.470375	0.245445	0.441379	0.049395	-0.169312	0.613882	0.575737	0.283367	0.524962					0.534995	0.569888	0.491619	0.493296	0.51554	0.722791	0.520374	0.811209	0.731564	0.668856	0.794353	0.737779	0.33887	0.207521	0.914278	0.307594	0.240128	0.453316	0.548394	0.501573	-0.0198391	-0.302402	0.285339	-0.0965604					-0.0303241		0.0823208
		77G7	0.28467	0.70261	0.181808	0.313211	0.215517	0.65266	0.0546708	-0.17132	0.92297	0.989357	-0.193649	0.877488					0.726295	0.892626	0.636398	0.953515	0.417439	0.728676	0.426648	0.578836	0.936249	0.979658	0.894294	0.842142	0.713025	0.371246	0.222557	0.740347	0.624932	0.886	0.896612	0.945876	0.35775	-0.18969	0.723067	0.0596237					0.206534		0.161581
		TauAB	-0.266539	-0.262939	-0.136908	-0.132578	-0.134417	-0.421561	0.152104	-0.266691	-0.175547	-0.172895	-0.246073	0.214404					-0.363399	-0.30588	-0.399388	-0.141306	-0.33052	-0.273237	-0.248593	-0.0487298	-0.20284	-0.164021	-0.307269	0.148107	0.0496589	0.173027	-0.17533	0.161365	-0.264154	-0.210631	-0.362107	-0.108158	-0.386535	-0.0768196	-0.193426	-0.191817					-0.268158		-0.331632
	407-438 p1	HT7	-0.00566672	0.29674	0.0708947	0.184622	0.169391	0.22247	0.274466	-0.266796	0.508256	0.594125	-0.288185	0.804175					0.275906	0.434628	0.203144	0.558706	0.0247154	0.298714	0.148338	0.412902	0.524161	0.590172	0.426264	0.690267	0.448129	0.253512	0.0239393	0.624158	0.296485	0.514913	0.435946	0.564476	0.0379285	-0.282294	0.723067	-0.0527009					0.00608566		-0.0624346
		77G7	-0.00868134	-0.0404693	-0.172334	-0.227044	0.0227296	-0.143818	-0.378899	0.69297	-0.201033	-0.049179	0.653834	-0.228353					-0.0474275	0.044888	-0.11562	-0.183217	0.0161136	0.00834757	-0.0890237	-0.113481	-0.119235	-0.102266	-0.088933	-0.153873	-0.0721612	-0.188312	0.13274	-0.263625	0.16717	-0.177086	-0.0264009	-0.165188	0.453545	-0.240175	-0.312354	-0.258859					-0.225451		-0.223072
		TauAB	-0.0763567	0.032815	0.00222346	0.110341	0.00779179	-0.175061	0.162615	-0.334361	0.194312	0.17311	-0.168646	0.530667					-0.0548137	0.0235772	-0.110671	0.185222	-0.0560708	0.114366	0.025002	0.334227	0.194534	0.213452	0.106635	0.533754	0.299522	0.338992	0.187049	0.386315	-0.0858404	0.0782387	-0.035302	0.218905	-0.306987	-0.170734	0.277905	-0.246027					-0.231563		-0.263064
	407-438 p2	HT7
		77G7
		TauAB	-0.191834	-0.222381	-0.16357	-0.142143	-0.303375	-0.505604	-0.0476786	-0.400495	-0.125371	-0.219824	-0.214571	0.153557					-0.372898	-0.345836	-0.427806	-0.136376	-0.192744	-0.16168	-0.211437	0.00860156	-0.171564	-0.174009	-0.261451	0.221661	0.180953	0.409493	0.0444224	0.153652	-0.392567	-0.298718	-0.470123	-0.0795837	-0.584073	0.0655804	-0.229172	-0.279366					-0.380302		-0.418129
	407-438 p3	HT7
		77G7
		TauAB
			Tau12	HT7	77G7	TauAB	Tau12	HT7	77G7	TauAB	Tau12	HT7	77G7	TauAB	Tau12	HT7	77G7	TauAB	Tau12	HT7	77G7	TauAB	Tau12	HT7	77G7	TauAB	Tau12	HT7	77G7	TauAB	Tau12	HT7	77G7	TauAB	Tau12	HT7	77G7	TauAB	Tau12	HT7	77G7	TauAB	Tau12	HT7	77G7	TauAB	Tau12	HT7	77G7
			175-190 p1				210-224 p1				210-224 p2				210-224 p3				212-224 p1				225-240 p1				225-240 p2				225-240p3				386-406 p1				386-406 p2				386-406 p3				407-438 p1
			TBS
[truncated: 51 more columns]

## Sheet: d) CBD
d)
			TBS
			175-190 p1				210-224 p1				210-224 p2				210-224 p3				212-224 p1				225-240 p1				225-240 p2				225-240p3				386-406 p1				386-406 p2				386-406 p3				407-438 p1
		CBD	Tau12	HT7	77G7	TauAB	Tau12	HT7	77G7	TauAB	Tau12	HT7	77G7	TauAB	Tau12	HT7	77G7	TauAB	Tau12	HT7	77G7	TauAB	Tau12	HT7	77G7	TauAB	Tau12	HT7	77G7	TauAB	Tau12	HT7	77G7	TauAB	Tau12	HT7	77G7	TauAB	Tau12	HT7	77G7	TauAB	Tau12	HT7	77G7	TauAB	Tau12	HT7	77G7
TBS	175-190 p1	Tau12	1	0.968487	0.958802	0.789802	0.197211	0.964463	0.0572179	-0.107799	0.803913	0.762256	0.866993	0.630422					0.143334	0.918493	0.939101	0.653691	0.871948	0.886821	0.980588	0.709113	0.582493	0.66515	0.643576	0.581875	0.674538	0.782809	0.590225	0.507964	-0.144345	0.667986	0.437227	0.515573	0.143658	0.390195	0.779756	-0.200412							0.765358
		HT7	0.968487	1	0.931139	0.738396	0.11031	0.910947	0.19264	-0.172097	0.725862	0.745112	0.915007	0.622362					0.0645305	0.93252	0.897336	0.606019	0.791909	0.866262	0.915335	0.656858	0.478611	0.601383	0.528939	0.539707	0.595237	0.764771	0.455742	0.492808	-0.0619002	0.551962	0.412209	0.5161	0.0225227	0.206729	0.870207	-0.193645							0.640275
		77G7	0.958802	0.931139	1	0.82247	0.166797	0.973272	-0.0232695	-0.0949323	0.62533	0.568608	0.837438	0.400656					0.163033	0.805929	0.894448	0.670827	0.748152	0.796544	0.941115	0.618404	0.376433	0.4691	0.475915	0.435538	0.500525	0.670206	0.486121	0.424736	-0.360572	0.493376	0.417041	0.524121	-0.0381659	0.294631	0.82723	-0.227735							0.763749
		TauAB	0.789802	0.738396	0.82247	1	0.0835552	0.800773	-0.11252	0.35967	0.599442	0.495729	0.758419	0.4381					-0.0150758	0.716608	0.882565	0.692011	0.655184	0.653957	0.813812	0.824619	0.518252	0.5762	0.646486	0.719194	0.661025	0.764601	0.710144	0.782333	-0.334632	0.438455	0.201496	0.64017	-0.0969679	0.343088	0.73417	-0.208872							0.521076
	210-224 p1	Tau12	0.197211	0.11031	0.166797	0.0835552	1	0.287486	0.188192	-0.186443	0.332265	0.433611	-0.0285276	0.252071					0.808896	0.271484	0.134583	0.593107	-0.02405	-0.167507	0.120374	0.303975	0.170925	0.233172	0.316362	0.249901	0.256877	0.266329	0.20994	0.183878	0.178	-0.0160997	0.577101	0.125911	0.404777	0.0204578	0.011009	-0.0132014							0.639708
		HT7	0.964463	0.910947	0.973272	0.800773	0.287486	1	0.055664	-0.0402694	0.693937	0.650949	0.753489	0.472348					0.220478	0.825752	0.873584	0.672143	0.780548	0.775124	0.945892	0.64068	0.4441	0.513576	0.54554	0.475782	0.546733	0.665818	0.511923	0.430151	-0.245512	0.543835	0.555906	0.402306	0.045947	0.381151	0.721668	-0.205854							0.813418
		77G7	0.0572179	0.19264	-0.0232695	-0.11252	0.188192	0.055664	1	-0.266151	0.000426668	0.291106	0.0716645	0.270802					-0.181199	0.286033	-0.0878111	-0.148531	-0.136569	-0.128423	-0.0964852	-0.0332671	-0.143894	-0.0211875	-0.15336	0.0488655	-0.0735265	0.0717901	-0.40804	0.0130857	0.748573	-0.173931	0.565855	-0.339556	-0.247856	-0.324477	0.593438	0.329373							-0.186878
		TauAB	-0.107799	-0.172097	-0.0949323	0.35967	-0.186443	-0.0402694	-0.266151	1	-0.00348171	-0.103548	-0.202935	-0.000755239					-0.168793	-0.136193	0.0138609	0.101687	0.0375727	-0.0423441	-0.0231833	0.223213	0.185896	0.0475061	0.256449	0.306666	0.158667	-0.0180671	0.337253	0.440806	-0.178398	-0.0607192	-0.155963	0.0145572	-0.14412	0.15552	-0.255864	-0.301836							-0.227943
	210-224 p2	Tau12	0.803913	0.725862	0.62533	0.599442	0.332265	0.693937	0.000426668	-0.00348171	1	0.93672	0.680056	0.914941					0.240479	0.864807	0.820157	0.619916	0.881342	0.79304	0.811995	0.807141	0.926347	0.944404	0.933528	0.813542	0.938623	0.854708	0.826687	0.643349	0.177719	0.845436	0.257369	0.497057	0.606989	0.517439	0.456637	-0.0889247							0.67859
		HT7	0.762256	0.745112	0.568608	0.495729	0.433611	0.650949	0.291106	-0.103548	0.93672	1	0.653096	0.948074					0.249133	0.912781	0.73609	0.587583	0.747388	0.684382	0.707802	0.758001	0.804376	0.881554	0.818138	0.781784	0.853071	0.838698	0.628673	0.628023	0.41408	0.687418	0.43705	0.426242	0.490342	0.329377	0.531371	-0.123428							0.597968
		77G7	0.866993	0.915007	0.837438	0.758419	-0.0285276	0.753489	0.0716645	-0.202935	0.680056	0.653096	1	0.609906					-0.0431897	0.876413	0.903504	0.594583	0.716844	0.825065	0.831592	0.715765	0.515573	0.65736	0.550239	0.622662	0.653785	0.842245	0.545287	0.599428	-0.117334	0.533779	0.0915937	0.71522	0.0419608	0.132263	0.944401	-0.0537936							0.499139
		TauAB	0.630422	0.622362	0.400656	0.4381	0.252071	0.472348	0.270802	-0.000755239	0.914941	0.948074	0.609906	1					0.0936787	0.828433	0.651334	0.464958	0.719574	0.651389	0.596316	0.726991	0.88098	0.920083	0.854592	0.829694	0.891687	0.810306	0.675391	0.668262	0.487714	0.713626	0.202279	0.418708	0.557025	0.300986	0.442634	0.0100802							0.389539
	210-224 p3	Tau12
		HT7
		77G7
		TauAB
	212-224 p1	Tau12	0.143334	0.0645305	0.163033	-0.0150758	0.808896	0.220478	-0.181199	-0.168793	0.240479	0.249133	-0.0431897	0.0936787					1	0.093156	0.0434632	0.672178	-0.0367523	-0.102464	0.0927409	0.082951	0.0722838	0.0673708	0.212385	0.0161545	0.105571	0.0581902	0.212728	-0.0288642	-0.206362	-0.105923	0.20155	0.220844	0.545655	-0.193143	-0.0610621	-0.0630023							0.667408
		HT7	0.918493	0.93252	0.805929	0.716608	0.271484	0.825752	0.286033	-0.136193	0.864807	0.912781	0.876413	0.828433					0.093156	1	0.901189	0.633624	0.793682	0.804148	0.860052	0.808882	0.677265	0.805437	0.719367	0.756695	0.791628	0.907488	0.589065	0.671042	0.196074	0.641729	0.442088	0.555446	0.195961	0.286054	0.806965	-0.146486							0.617961
		77G7	0.939101	0.897336	0.894448	0.882565	0.134583	0.873584	-0.0878111	0.0138609	0.820157	0.73609	0.903504	0.651334					0.0434632	0.901189	1	0.676277	0.857301	0.870614	0.950775	0.872477	0.688124	0.781639	0.748146	0.754633	0.802971	0.907271	0.74745	0.710574	-0.167715	0.699081	0.255273	0.678215	0.137263	0.465383	0.792132	-0.229257							0.675363
		TauAB	0.653691	0.606019	0.670827	0.692011	0.593107	0.672143	-0.148531	0.101687	0.619916	0.587583	0.594583	0.464958					0.672178	0.633624	0.676277	1	0.415742	0.409428	0.613045	0.696078	0.44637	0.51767	0.626727	0.59833	0.593501	0.662514	0.660655	0.622496	-0.294978	0.202129	0.194496	0.711551	0.322162	-0.022685	0.560217	-0.183826							0.765414
	225-240 p1	Tau12	0.871948	0.791909	0.748152	0.655184	-0.02405	0.780548	-0.136569	0.0375727	0.881342	0.747388	0.716844	0.719574					-0.0367523	0.793682	0.857301	0.415742	1	0.956689	0.924273	0.667617	0.805727	0.790602	0.776026	0.620108	0.783316	0.719001	0.726473	0.471115	-0.0619069	0.917487	0.210886	0.38759	0.371997	0.657744	0.498986	-0.174371							0.612387
		HT7	0.886821	0.866262	0.796544	0.653957	-0.167507	0.775124	-0.128423	-0.0423441	0.79304	0.684382	0.825065	0.651389					-0.102464	0.804148	0.870614	0.409428	0.956689	1	0.918892	0.619087	0.679798	0.706525	0.644591	0.545487	0.688682	0.705386	0.619355	0.438592	-0.131191	0.812177	0.119201	0.462529	0.22563	0.484308	0.646765	-0.219156							0.538087
		77G7	0.980588	0.915335	0.941115	0.813812	0.120374	0.945892	-0.0964852	-0.0231833	0.811995	0.707802	0.831592	0.596316					0.0927409	0.860052	0.950775	0.613045	0.924273	0.918892	1	0.720387	0.640109	0.68685	0.688304	0.59063	0.704714	0.76614	0.672822	0.509749	-0.234947	0.748545	0.348909	0.511878	0.180992	0.522411	0.716452	-0.21687							0.759479
		TauAB	0.709113	0.656858	0.618404	0.824619	0.303975	0.64068	-0.0332671	0.223213	0.807141	0.758001	0.715765	0.726991					0.082951	0.808882	0.872477	0.696078	0.667617	0.619087	0.720387	1	0.77929	0.870827	0.855946	0.953715	0.908359	0.952923	0.836294	0.925666	0.0699474	0.588167	0.203984	0.665614	0.224282	0.438709	0.588396	-0.185502							0.515962
	225-240 p2	Tau12	0.582493	0.478611	0.376433	0.518252	0.170925	0.4441	-0.143894	0.185896	0.926347	0.804376	0.515573	0.88098					0.0722838	0.677265	0.688124	0.44637	0.805727	0.679798	0.640109	0.77929	1	0.962139	0.969239	0.854922	0.963903	0.78385	0.898021	0.688042	0.2112	0.868279	0.0102091	0.463829	0.66164	0.610117	0.235744	-0.0444167							0.447587
		HT7	0.66515	0.601383	0.4691	0.5762	0.233172	0.513576	-0.0211875	0.0475061	0.944404	0.881554	0.65736	0.920083					0.0673708	0.805437	0.781639	0.51767	0.790602	0.706525	0.68685	0.870827	0.962139	1	0.945897	0.913511	0.987757	0.909373	0.85502	0.76661	0.275478	0.82588	0.0997146	0.571438	0.556195	0.53087	0.420028	-0.0776972							0.481233
		77G7	0.643576	0.528939	0.475915	0.646486	0.316362	0.54554	-0.15336	0.256449	0.933528	0.818138	0.550239	0.854592					0.212385	0.719367	0.748146	0.626727	0.776026	0.644591	0.688304	0.855946	0.969239	0.945897	1	0.90203	0.977041	0.830513	0.947315	0.776236	0.108076	0.782477	0.0913079	0.558721	0.617141	0.55255	0.307971	-0.0945918							0.562488
		TauAB	0.581875	0.539707	0.435538	0.719194	0.249901	0.475782	0.0488655	0.306666	0.813542	0.781784	0.622662	0.829694					0.0161545	0.756695	0.754633	0.59833	0.620108	0.545487	0.59063	0.953715	0.854922	0.913511	0.90203	1	0.945193	0.915971	0.842206	0.953101	0.247012	0.592234	0.103765	0.614902	0.325075	0.385748	0.470155	-0.101869							0.349703
	225-240p3	Tau12	0.674538	0.595237	0.500525	0.661025	0.256877	0.546733	-0.0735265	0.158667	0.938623	0.853071	0.653785	0.891687					0.105571	0.791628	0.802971	0.593501	0.783316	0.688682	0.704714	0.908359	0.963903	0.987757	0.977041	0.945193	1	0.91361	0.913503	0.823378	0.185615	0.792503	0.0859005	0.607856	0.538303	0.526128	0.425305	-0.0825982							0.508958
		HT7	0.782809	0.764771	0.670206	0.764601	0.266329	0.665818	0.0717901	-0.0180671	0.854708	0.838698	0.842245	0.810306					0.0581902	0.907488	0.907271	0.662514	0.719001	0.705386	0.76614	0.952923	0.78385	0.909373	0.830513	0.915971	0.91361	1	0.772046	0.854905	0.14514	0.651784	0.204162	0.725034	0.261109	0.370005	0.711119	-0.12903							0.535148
		77G7	0.590225	0.455742	0.486121	0.710144	0.20994	0.511923	-0.40804	0.337253	0.826687	0.628673	0.545287	0.675391					0.212728	0.589065	0.74745	0.660655	0.726473	0.619355	0.672822	0.836294	0.898021	0.85502	0.947315	0.842206	0.913503	0.772046	1	0.762163	-0.169563	0.717783	-0.112663	0.647934	0.563996	0.546792	0.321511	-0.0960204							0.552856
		TauAB	0.507964	0.492808	0.424736	0.782333	0.183878	0.430151	0.0130857	0.440806	0.643349	0.628023	0.599428	0.668262					-0.0288642	0.671042	0.710574	0.622496	0.471115	0.438592	0.509749	0.925666	0.688042	0.76661	0.776236	0.953101	0.823378	0.854905	0.762163	1	0.118411	0.381266	0.0522447	0.686219	0.0955549	0.23903	0.50426	-0.219505							0.242948
	386-406 p1	Tau12	-0.144345	-0.0619002	-0.360572	-0.334632	0.178	-0.245512	0.748573	-0.178398	0.177719	0.41408	-0.117334	0.487714					-0.206362	0.196074	-0.167715	-0.294978	-0.0619069	-0.131191	-0.234947	0.0699474	0.2112	0.275478	0.108076	0.247012	0.185615	0.14514	-0.169563	0.118411	1	0.0966926	0.320256	-0.325102	0.155397	-0.0295873	-0.196344	0.213257							-0.305243
		HT7	0.667986	0.551962	0.493376	0.438455	-0.0160997	0.543835	-0.173931	-0.0607192	0.845436	0.687418	0.533779	0.713626					-0.105923	0.641729	0.699081	0.202129	0.917487	0.812177	0.748545	0.588167	0.868279	0.82588	0.782477	0.592234	0.792503	0.651784	0.717783	0.381266	0.0966926	1	0.112882	0.28249	0.533759	0.799367	0.260934	-0.0396621							0.497063
		77G7	0.437227	0.412209	0.417041	0.201496	0.577101	0.555906	0.565855	-0.155963	0.257369	0.43705	0.0915937	0.202279					0.20155	0.442088	0.255273	0.194496	0.210886	0.119201	0.348909	0.203984	0.0102091	0.0997146	0.0913079	0.103765	0.0859005	0.204162	-0.112663	0.0522447	0.320256	0.112882	1	-0.234261	-0.162474	0.238758	0.261127	-0.199142							0.468887
		TauAB	0.515573	0.5161	0.524121	0.64017	0.125911	0.402306	-0.339556	0.0145572	0.497057	0.426242	0.71522	0.418708					0.220844	0.555446	0.678215	0.711551	0.38759	0.462529	0.511878	0.665614	0.463829	0.571438	0.558721	0.614902	0.607856	0.725034	0.647934	0.686219	-0.325102	0.28249	-0.234261	1	0.161503	0.00730108	0.63971	-0.315642							0.413175
	386-406 p2	Tau12	0.143658	0.0225227	-0.0381659	-0.0969679	0.404777	0.045947	-0.247856	-0.14412	0.606989	0.490342	0.0419608	0.557025					0.545655	0.195961	0.137263	0.322162	0.371997	0.22563	0.180992	0.224282	0.66164	0.556195	0.617141	0.325075	0.538303	0.261109	0.563996	0.0955549	0.155397	0.533759	-0.162474	0.161503	1	0.267025	-0.214485	0.2391							0.440318
		HT7	0.390195	0.206729	0.294631	0.343088	0.0204578	0.381151	-0.324477	0.15552	0.517439	0.329377	0.132263	0.300986					-0.193143	0.286054	0.465383	-0.022685	0.657744	0.484308	0.522411	0.438709	0.610117	0.53087	0.55255	0.385748	0.526128	0.370005	0.546792	0.23903	-0.0295873	0.799367	0.238758	0.00730108	0.267025	1	-0.0929901	-0.19492							0.377352
		77G7	0.779756	0.870207	0.82723	0.73417	0.011009	0.721668	0.593438	-0.255864	0.456637	0.531371	0.944401	0.442634					-0.0610621	0.806965	0.792132	0.560217	0.498986	0.646765	0.716452	0.588396	0.235744	0.420028	0.307971	0.470155	0.425305	0.711119	0.321511	0.50426	-0.196344	0.260934	0.261127	0.63971	-0.214485	-0.0929901	1	0.0337669							0.41971
		TauAB	-0.200412	-0.193645	-0.227735	-0.208872	-0.0132014	-0.205854	0.329373	-0.301836	-0.0889247	-0.123428	-0.0537936	0.0100802					-0.0630023	-0.146486	-0.229257	-0.183826	-0.174371	-0.219156	-0.21687	-0.185502	-0.0444167	-0.0776972	-0.0945918	-0.101869	-0.0825982	-0.12903	-0.0960204	-0.219505	0.213257	-0.0396621	-0.199142	-0.315642	0.2391	-0.19492	0.0337669	1							-0.159009
	386-406 p3	Tau12
		HT7
		77G7
		TauAB
	407-438 p1	Tau12
		HT7
		77G7	0.765358	0.640275	0.763749	0.521076	0.639708	0.813418	-0.186878	-0.227943	0.67859	0.597968	0.499139	0.389539					0.667408	0.617961	0.675363	0.765414	0.612387	0.538087	0.759479	0.515962	0.447587	0.481233	0.562488	0.349703	0.508958	0.535148	0.552856	0.242948	-0.305243	0.497063	0.468887	0.413175	0.440318	0.377352	0.41971	-0.159009							1
		TauAB
	407-438 p2	Tau12
		HT7
		77G7
		TauAB
	407-438 p3	Tau12
		HT7
		77G7
		TauAB
SI	175-190 p1	HT7	0.66119	0.61028	0.640638	0.906781	0.177971	0.635963	-0.0859307	0.458871	0.650453	0.564254	0.665562	0.582006					0.130478	0.673149	0.76052	0.764943	0.569707	0.533296	0.669925	0.804214	0.626527	0.646177	0.76219	0.804445	0.741325	0.752397	0.793555	0.857602	-0.211477	0.388714	0.0593414	0.713443	0.13312	0.183301	0.591596	-0.137407							0.449298
		77G7	0.267825	0.160401	0.2486	0.697786	0.0798879	0.255013	-0.355375	0.713482	0.427663	0.26774	0.276424	0.367255					0.0567702	0.279351	0.457733	0.534692	0.337214	0.235009	0.343224	0.64041	0.580024	0.510678	0.692643	0.703634	0.625083	0.501647	0.787629	0.780783	-0.261951	0.284597	-0.206643	0.590653	0.186736	0.275139	0.149438	-0.167791							0.188969
		TauAB	0.0656204	-0.0327128	0.0402087	0.524733	0.0818666	0.0529	-0.295977	0.728391	0.278556	0.156982	0.0886665	0.283351					0.0287311	0.121336	0.254092	0.394383	0.150241	0.031423	0.131436	0.48971	0.473291	0.392593	0.577591	0.601903	0.500813	0.355385	0.648908	0.695248	-0.162496	0.149284	-0.233937	0.504593	0.154872	0.185385	-0.0253739	-0.17086							0.0261012
	210-224 p1	HT7	-0.0755284	-0.131582	-0.00810495	0.43505	-0.0384906	-0.0470001	-0.401572	0.767027	-0.020264	-0.121762	-0.0210694	-0.0315211					0.0467302	-0.0871095	0.0906798	0.34674	-0.0754126	-0.114078	-0.0204522	0.264049	0.141609	0.0708385	0.274442	0.330901	0.191449	0.114655	0.40819	0.522648	-0.390939	-0.161738	-0.320504	0.488307	-0.101948	-0.0580907	-0.0679995	-0.34651							-0.0908694
		77G7	-0.0346705	0.000597885	0.0363671	0.36945	-0.33866	-0.0198228	-0.0734724	0.688339	-0.172287	-0.16363	0.0276997	-0.086404					-0.333607	-0.0329022	0.0438739	0.0424351	-0.0741063	-0.0363394	-0.0217229	0.0815348	-0.0715292	-0.0979397	0.0112893	0.154289	-0.0186896	0.00647766	0.0606169	0.377755	-0.220305	-0.226108	-0.131749	0.295286	-0.495836	-0.143151	0.0620873	-0.467954							-0.328243
		TauAB	-0.0959535	-0.159496	-0.148037	0.399149	0.109348	-0.121359	-0.144465	0.71667	0.193963	0.140251	-0.013134	0.283962					-0.0573493	0.0631675	0.13723	0.280827	-0.00967846	-0.126002	-0.0497967	0.495581	0.422479	0.378412	0.507365	0.634609	0.468205	0.34435	0.54337	0.734301	0.0748515	0.0378397	-0.217377	0.407818	0.0904789	0.120102	-0.0914238	-0.130348							-0.154568
	210-224 p2	HT7	0.319494	0.184182	0.19866	0.488333	0.361959	0.281695	-0.201667	0.49568	0.654984	0.534135	0.204916	0.622627					0.347571	0.376779	0.399259	0.581928	0.443455	0.26789	0.364742	0.57897	0.75722	0.653004	0.839177	0.700783	0.732608	0.501441	0.818511	0.642161	-0.00269227	0.456094	-0.042897	0.453001	0.609814	0.305088	0.0118957	-0.0263716							0.388908
		77G7	0.139671	0.000818838	0.00715637	0.386805	0.272212	0.100051	-0.210897	0.59534	0.544324	0.418868	0.0475599	0.551522					0.209301	0.228616	0.263067	0.410655	0.334772	0.13902	0.205178	0.518895	0.725235	0.599178	0.780984	0.675526	0.676857	0.407307	0.765592	0.624729	0.0796745	0.407525	-0.121279	0.337881	0.564701	0.343332	-0.148914	-0.00108649							0.199049
		TauAB	0.221408	0.0879192	0.11714	0.481941	0.271557	0.185361	-0.228762	0.577165	0.548888	0.422974	0.142141	0.53614					0.22474	0.286632	0.338666	0.488563	0.359569	0.18416	0.278894	0.545951	0.6996	0.592345	0.780184	0.681013	0.678615	0.453345	0.778978	0.658983	-0.0201342	0.393927	-0.104749	0.455276	0.496189	0.308776	-0.0398492	-0.061568							0.2589
	210-224 p3	HT7	0.29824	0.225738	0.219172	0.584113	0.278927	0.23031	-0.271293	0.527932	0.575415	0.484942	0.344872	0.573278					0.299782	0.405366	0.469166	0.689378	0.337834	0.255543	0.326134	0.695897	0.678927	0.650046	0.785925	0.787237	0.734674	0.612516	0.819989	0.821298	-0.0801932	0.290495	-0.20443	0.708661	0.423176	0.114022	0.183735	-0.183843							0.284687
		77G7	-0.172655	-0.183162	-0.242186	0.222916	0.325111	-0.149415	0.202101	0.683005	0.115403	0.20536	-0.171139	0.28728					0.0888711	0.0566946	-0.0330736	0.274682	-0.182186	-0.294258	-0.196652	0.391625	0.25081	0.238391	0.353787	0.537542	0.313845	0.219691	0.289893	0.633796	0.353384	-0.194527	0.0759449	0.127875	0.026987	-0.100969	-0.164111	-0.117832							-0.189459
		TauAB	0.238454	0.109999	0.169799	0.594325	-0.0129219	0.18938	-0.451199	0.663012	0.513519	0.291812	0.251545	0.441837					0.0296269	0.241377	0.436417	0.442844	0.440253	0.320593	0.347395	0.616114	0.714106	0.598254	0.765482	0.704005	0.694189	0.482452	0.869722	0.702707	-0.219783	0.452489	-0.356655	0.493442	0.406599	0.389808	0.0477253	-0.00883954							0.175549
	212-224 p1	HT7	0.427916	0.373126	0.317575	0.669677	0.28283	0.345921	0.00541583	0.424383	0.667764	0.626682	0.478938	0.715381					0.133067	0.586036	0.577261	0.632894	0.434822	0.338166	0.429874	0.785507	0.741834	0.753018	0.834788	0.889471	0.820303	0.748789	0.798368	0.893697	0.120037	0.401947	-0.0143327	0.668692	0.341879	0.185489	0.351322	-0.0604537							0.282536
		77G7	-0.13318	-0.212159	-0.194378	0.32551	0.138896	-0.19163	-0.28328	0.542145	0.218018	0.130633	0.00650638	0.272907					-0.0210891	0.0367542	0.154724	0.266178	-0.0128924	-0.125897	-0.0688708	0.529971	0.471498	0.448416	0.529937	0.644191	0.51675	0.398932	0.59684	0.710636	0.0584315	0.113562	-0.329618	0.489801	0.206754	0.200961	-0.116401	-0.0978093							-0.111709
		TauAB	-0.314985	-0.362808	-0.390416	-0.0374347	-0.307028	-0.463568	-0.485494	0.284892	0.0259148	-0.10561	-0.0906371	0.102254					-0.275848	-0.199039	-0.0580268	-0.162288	-0.0321759	-0.0743672	-0.215823	0.135448	0.339341	0.276927	0.271282	0.281744	0.279613	0.124118	0.358727	0.310353	-0.0146755	0.188371	-0.656088	0.411212	0.215774	0.204662	-0.314106	-0.172165							-0.357077
	225-240 p1	HT7	0.33914	0.248301	0.247174	0.605562	0.24851	0.258137	-0.307232	0.500679	0.621676	0.513318	0.368757	0.599851					0.227534	0.438458	0.522273	0.638663	0.415067	0.316685	0.383064	0.728985	0.741215	0.711318	0.830846	0.81532	0.786209	0.657671	0.858936	0.831907	-0.0724369	0.402569	-0.178977	0.727124	0.428052	0.252028	0.177673	-0.233139							0.306795
		77G7	-0.185841	-0.292055	-0.247838	0.196022	0.191692	-0.252353	-0.455532	0.443654	0.214331	0.0892844	-0.0708977	0.224724					0.148049	-0.0560557	0.0820287	0.28134	-0.0280799	-0.150114	-0.10758	0.421634	0.47012	0.416462	0.519039	0.532891	0.47729	0.310056	0.607783	0.569323	-0.0436543	0.134169	-0.426294	0.51241	0.384674	0.201027	-0.251357	-0.120045							-0.025981
		TauAB	-0.136448	-0.223766	-0.190446	0.257512	0.223038	-0.196974	-0.345141	0.465757	0.211549	0.130562	-0.0254681	0.251624					0.13955	0.0118651	0.110028	0.32452	-0.0407049	-0.154672	-0.0835529	0.43835	0.436908	0.405086	0.510404	0.556588	0.471107	0.342521	0.570583	0.622929	-0.0140851	0.0825922	-0.330092	0.562092	0.289194	0.131457	-0.165063	-0.186236							-0.025272
	225-240 p2	HT7	0.096491	-0.020538	0.0063644	0.454605	0.21977	0.0540678	-0.248109	0.616236	0.444907	0.322971	0.0989219	0.463128					0.148181	0.198722	0.27483	0.438455	0.232715	0.0735475	0.157888	0.55088	0.641271	0.551047	0.720983	0.692842	0.640877	0.437366	0.748952	0.705015	-0.00547439	0.290987	-0.214895	0.478091	0.417227	0.247872	-0.0630442	-0.0336762							0.122111
		77G7	-0.082958	-0.211329	-0.145904	0.348474	0.153857	-0.10431	-0.358999	0.677664	0.28022	0.130991	-0.0671981	0.285981					0.10584	-0.00242268	0.127592	0.319395	0.0901424	-0.0725985	0.00305294	0.440486	0.528729	0.415104	0.600362	0.578348	0.511399	0.286411	0.673309	0.612513	-0.0711561	0.183837	-0.321615	0.383784	0.364052	0.246553	-0.226292	-0.0250349							0.0020488
		TauAB	0.0361523	-0.0856236	-0.0465678	0.416958	0.157345	-0.0103192	-0.311835	0.626467	0.385767	0.250011	0.0513981	0.39908					0.0881941	0.13014	0.234162	0.364057	0.19892	0.0412929	0.111644	0.509888	0.610817	0.514636	0.678961	0.651664	0.601337	0.393453	0.723202	0.673585	-0.0348384	0.282111	-0.267381	0.473183	0.380804	0.281029	-0.122128	-0.0756689							0.0639644
	225-240p3	HT7	0.0504825	-0.0272923	0.0338491	0.535539	0.115955	0.0389528	-0.226983	0.701869	0.250886	0.156353	0.115588	0.279948					0.0360307	0.136349	0.251202	0.426655	0.0881063	-0.0149581	0.0986614	0.515489	0.433397	0.380575	0.550271	0.624265	0.490136	0.382595	0.620229	0.734316	-0.126587	0.0760845	-0.227791	0.529892	0.108703	0.100113	0.0360254	-0.126901							0.00096659
		77G7	-0.114978	-0.201953	-0.143375	0.405167	0.0803306	-0.125812	-0.264513	0.734724	0.15993	0.0574817	-0.0409418	0.205174					-0.0295577	-0.00741901	0.121497	0.284058	-0.011864	-0.134258	-0.0474408	0.45367	0.402259	0.332329	0.4919	0.578721	0.434123	0.289743	0.569823	0.6801	-0.0573479	0.0405429	-0.291557	0.40949	0.116648	0.14808	-0.131363	-0.0968001							-0.125721
		TauAB	-0.0272249	-0.100902	-0.033087	0.456618	0.039361	-0.0388542	-0.261558	0.714172	0.153248	0.0630592	0.032848	0.191548					-0.0167728	0.0438847	0.162449	0.3247	0.0278001	-0.0681339	0.0257998	0.400761	0.351686	0.286354	0.457989	0.519315	0.390784	0.277309	0.529578	0.647304	-0.155124	0.025693	-0.256461	0.49661	0.0448252	0.0829564	-0.048419	-0.211784							-0.0786076
	386-406 p1	HT7	0.389882	0.267545	0.258759	0.519205	0.57924	0.352232	-0.149363	0.365168	0.745967	0.67702	0.28652	0.693412					0.465377	0.507676	0.513271	0.716423	0.442516	0.280061	0.411668	0.77344	0.796284	0.771714	0.893501	0.833156	0.833637	0.677583	0.855337	0.764474	0.114964	0.456198	0.102564	0.516575	0.619215	0.338436	0.109634	-0.0976985							0.514571
		77G7	0.106273	-0.0233079	0.0225217	0.404653	0.413658	0.0882656	-0.250406	0.548544	0.459045	0.362305	0.0475051	0.449591					0.357593	0.200426	0.248528	0.539574	0.191668	0.018163	0.149604	0.527822	0.606341	0.523706	0.71398	0.648554	0.613766	0.413095	0.725484	0.653168	-0.0164352	0.239084	-0.106407	0.479116	0.491138	0.208106	-0.105135	-0.0954797							0.254978
		TauAB	0.250423	0.118902	0.124726	0.449071	0.507064	0.231547	-0.153228	0.436755	0.6479	0.546288	0.165994	0.607714					0.398084	0.361379	0.391231	0.609071	0.353109	0.172902	0.291981	0.697956	0.7504	0.689502	0.832292	0.777889	0.762315	0.562863	0.822804	0.700725	0.122786	0.399419	-4.18242e-06	0.359248	0.628575	0.327269	0.00623911	0.103314							0.392119
	386-406 p2	HT7	0.233138	0.147037	0.0705099	0.352857	0.492603	0.152124	-0.0255905	0.344084	0.646219	0.635036	0.189148	0.709861					0.364161	0.426423	0.342989	0.555816	0.311728	0.154404	0.231656	0.620659	0.739177	0.71095	0.809096	0.76567	0.753701	0.581016	0.718754	0.709002	0.274649	0.371343	0.0312103	0.505864	0.595119	0.196291	0.0159507	-0.112458							0.303078
		77G7	0.0105848	-0.106934	-0.133152	0.235676	0.445333	-0.0502777	-0.195305	0.436923	0.490364	0.429899	-0.0212248	0.53112					0.322165	0.188498	0.183229	0.423186	0.161598	-0.0215865	0.0501716	0.538566	0.670051	0.60708	0.727181	0.684425	0.658924	0.437917	0.693879	0.640725	0.214979	0.293261	-0.111935	0.408002	0.590986	0.262359	-0.206779	-0.0894392							0.175374
		TauAB	0.139804	0.0175692	-0.0304304	0.299467	0.409067	0.0577365	-0.147394	0.389684	0.608632	0.542142	0.0854154	0.645522					0.259804	0.312531	0.290267	0.417879	0.313308	0.122662	0.180642	0.591775	0.773014	0.709695	0.811936	0.742612	0.750331	0.525024	0.749536	0.665953	0.25492	0.446256	-0.0513444	0.427599	0.625188	0.361325	-0.12688	-0.0840371							0.235882
	386-406 p3	HT7	0.220585	0.183592	0.167228	0.0321609	0.339951	0.105358	-0.299485	-0.326814	0.372991	0.342195	0.273477	0.328862					0.547719	0.252234	0.217123	0.461729	0.185827	0.181967	0.196124	0.147266	0.326064	0.34832	0.362223	0.177888	0.332283	0.298589	0.353256	0.124739	-0.154954	0.229442	-0.183976	0.659792	0.556969	-0.0832703	0.115072	-0.204847							0.439932
		77G7	-0.0881491	-0.131913	-0.0570121	0.474167	0.0788726	-0.0111193	-0.0546364	0.856306	0.0197521	-0.0245106	-0.0698252	0.0645072					-0.0569001	-0.0187116	0.0881643	0.301724	-0.101558	-0.184933	-0.0524027	0.411711	0.17501	0.124895	0.30519	0.481179	0.249857	0.179546	0.381465	0.635026	-0.0672971	-0.185996	-0.0853334	0.168699	-0.163161	-0.00447628	-0.0299236	-0.044466							-0.164212
		TauAB	0.203714	0.0694304	0.0673706	0.444933	-0.135478	0.133657	-0.293285	0.594297	0.54772	0.330984	0.16452	0.519417					-0.180804	0.22689	0.361447	0.165773	0.529616	0.370071	0.326172	0.52323	0.781118	0.630551	0.752145	0.654895	0.690124	0.412896	0.788281	0.566771	0.0187876	0.621802	-0.280072	0.205215	0.46372	0.563606	-0.0722508	0.148029							0.0640016
	407-438 p1	HT7	0.471667	0.470357	0.373373	0.751495	-0.0661971	0.388159	0.0455407	0.612299	0.603908	0.561516	0.54715	0.67481					-0.179686	0.599858	0.62264	0.487119	0.522305	0.496092	0.487769	0.780701	0.683653	0.688942	0.738937	0.870873	0.754962	0.708402	0.719601	0.912644	0.107032	0.3949	-0.0592392	0.531798	0.0850374	0.186849	0.439586	-0.130507							0.0851841
		77G7
		TauAB	0.514497	0.504662	0.307892	0.437578	0.184916	0.331704	-0.0177595	0.0716782	0.853449	0.837372	0.594565	0.905202					0.0982717	0.720737	0.653993	0.502124	0.640798	0.608599	0.514978	0.807487	0.888971	0.942281	0.860972	0.882771	0.919519	0.845096	0.770066	0.766317	0.350956	0.66002	-0.0522625	0.592015	0.555537	0.308622	0.364271	-0.132836							0.320677
	407-438 p2	HT7	-0.168829	-0.164321	-0.185762	-0.243084	-0.31932	-0.271962	-0.179741	-0.129702	-0.144471	-0.173706	-0.0840198	-0.0697698					-0.159133	-0.185359	-0.204647	-0.283204	-0.0554295	-0.0394578	-0.152593	-0.369726	-0.0518602	-0.110268	-0.114274	-0.252513	-0.142159	-0.207606	-0.124068	-0.240166	-0.111796	0.0497856	-0.323625	0.202167	0.0544039	-0.0788897	-0.18355	-0.181043							-0.211719
		77G7
		TauAB	0.449067	0.340053	0.245315	0.402969	0.00874755	0.291775	-0.301259	0.221112	0.834066	0.663089	0.417925	0.787999					0.0120022	0.517061	0.57361	0.322751	0.758185	0.642938	0.537022	0.651898	0.968916	0.888671	0.904262	0.750407	0.887344	0.654122	0.874532	0.582461	0.130413	0.856352	-0.199939	0.428556	0.70436	0.603312	0.100895	-0.0308536							0.327904
	407-438 p3	HT7
		77G7
		TauAB	-0.136889	-0.15053	-0.102907	-0.304114	0.569723	-0.090694	-0.00602057	-0.2422	-0.10485	-0.00144472	-0.248731	-0.103942					0.746391	-0.139503	-0.28987	0.300423	-0.326781	-0.355208	-0.222347	-0.314693	-0.234453	-0.236714	-0.129828	-0.292882	-0.228155	-0.241672	-0.185832	-0.273673	-0.096051	-0.350861	0.142472	0.13772	0.277248	-0.436567	-0.209521	-0.174776							0.28872
			Tau12	HT7	77G7	TauAB	Tau12	HT7	77G7	TauAB	Tau12	HT7	77G7	TauAB	Tau12	HT7	77G7	TauAB	Tau12	HT7	77G7	TauAB	Tau12	HT7	77G7	TauAB	Tau12	HT7	77G7	TauAB	Tau12	HT7	77G7	TauAB	Tau12	HT7	77G7	TauAB	Tau12	HT7	77G7	TauAB	Tau12	HT7	77G7	TauAB	Tau12	HT7	77G7
			175-190 p1				210-224 p1				210-224 p2				210-224 p3				212-224 p1				225-240 p1				225-240 p2				225-240p3				386-406 p1				386-406 p2				386-406 p3				407-438 p1
			TBS
[truncated: 51 more columns]

## Sheet: e) PiD
e)
			TBS
			175-190 p1				210-224 p1				210-224 p2				210-224 p3				212-224 p1				225-240 p1				225-240 p2				225-240p3				386-406 p1				386-406 p2				386-406 p3				407-438 p1
		PiD	Tau12	HT7	77G7	TauAB	Tau12	HT7	77G7	TauAB	Tau12	HT7	77G7	TauAB	Tau12	HT7	77G7	TauAB	Tau12	HT7	77G7	TauAB	Tau12	HT7	77G7	TauAB	Tau12	HT7	77G7	TauAB	Tau12	HT7	77G7	TauAB	Tau12	HT7	77G7	TauAB	Tau12	HT7	77G7	TauAB	Tau12	HT7	77G7	TauAB	Tau12	HT7	77G7
TBS	175-190 p1	Tau12	1	0.712874	0.597929	0.443756	0.00512879	0.084736	-0.471369	0.0241997	0.496008	0.219095	-0.217549	0.413139					0.665231	0.396199	0.368302	0.368569	0.904162	0.762607	0.613609	0.77345	0.489595	0.340852	0.334497	0.320918	0.464905	0.319256	0.0805906	0.444632	0.233893	0.0940582	-0.0379414	0.094043	0.0878065	0.0948331	-0.13362	-0.0797804
		HT7	0.712874	1	0.514884	0.147393	0.210402	0.353974	-0.420163	-0.358412	0.605826	0.627576	-0.172267	0.660195					0.76537	0.695022	0.615388	0.0893642	0.669224	0.901204	0.718357	0.564318	0.606253	0.704893	0.57038	0.558103	0.509043	0.726178	0.309441	0.543434	-0.0072902	0.616258	-0.270663	0.616186	0.16163	0.333768	0.121756	0.0513566
		77G7	0.597929	0.514884	1	0.650193	0.27969	0.327128	-0.244814	0.302378	0.347297	0.455212	0.000572343	0.48074					0.331922	0.547412	0.585828	-0.0911635	0.26533	0.252212	0.830326	0.69799	0.311207	0.337596	0.498818	0.269069	0.362572	0.219658	0.211175	0.343133	0.566677	0.11067	-0.0173775	0.110689	0.0588009	0.340847	0.152849	0.0923167
		TauAB	0.443756	0.147393	0.650193	1	-0.133159	-0.22489	-0.345044	0.580547	-0.269185	-0.167516	-0.385343	-0.224199					-0.246085	-0.0906554	-0.198538	-0.108646	0.148598	0.00197527	0.205909	0.865209	-0.387898	-0.37228	-0.309976	-0.366176	-0.259337	-0.236255	-0.305025	-0.138128	0.964297	-0.0943652	-0.295493	-0.0943519	-0.153196	-0.0865147	-0.202153	-0.168423
	210-224 p1	Tau12	0.00512879	0.210402	0.27969	-0.133159	1	0.836622	0.366756	-0.0177237	0.0789331	0.846591	0.395068	0.426613					0.237048	0.7713	0.49279	0.102396	-0.112915	0.00898867	0.27523	-0.155784	0.373504	0.533293	0.5331	0.0278355	-0.025954	-0.0962139	-0.0604511	-0.193778	-0.133809	-0.244154	-0.205761	-0.244171	-0.0241877	0.978715	0.920204	0.124636
		HT7	0.084736	0.353974	0.327128	-0.22489	0.836622	1	0.249435	-0.0529555	0.122229	0.834548	0.164009	0.580174					0.527305	0.8811	0.697374	0.326665	-0.0857507	0.108185	0.361731	-0.134037	0.594249	0.744497	0.694728	0.239571	0.159279	0.0345561	0.184583	-0.0536461	-0.282343	0.0468345	-0.117962	0.0468408	0.356387	0.79805	0.658227	0.334523
		77G7	-0.471369	-0.420163	-0.244814	-0.345044	0.366756	0.249435	1	0.0826222	-0.316152	0.100942	0.134504	-0.014002					-0.27011	0.0264455	-0.150444	0.0804004	-0.494527	-0.457773	-0.28988	-0.606197	-0.120687	-0.0410787	-0.0544363	-0.313896	-0.242604	-0.388559	-0.0885526	-0.338291	-0.223787	-0.327327	-0.136499	-0.327355	0.147426	0.255435	0.586177	-0.0638907
		TauAB	0.0241997	-0.358412	0.302378	0.580547	-0.0177237	-0.0529555	0.0826222	1	-0.465805	-0.289731	-0.335044	-0.141966					-0.305692	-0.239442	-0.227052	0.369596	-0.254163	-0.415079	-0.142244	0.318417	-0.263253	-0.331753	-0.277247	-0.338676	-0.23726	-0.536212	-0.555506	-0.21143	0.646731	-0.425818	0.0271962	-0.425806	0.38577	-0.14838	-0.207793	-0.289657
	210-224 p2	Tau12	0.496008	0.605826	0.347297	-0.269185	0.0789331	0.122229	-0.316152	-0.465805	1	0.459997	0.418877	0.749216					0.716817	0.465121	0.732496	-0.0790538	0.61272	0.67188	0.789987	0.108204	0.777456	0.667549	0.77417	0.882728	0.906241	0.822977	0.564197	0.872895	-0.366861	0.314163	0.416224	0.314129	0.00407012	0.175298	0.0436696	0.0252887
		HT7	0.219095	0.627576	0.455212	-0.167516	0.846591	0.834548	0.100942	-0.289731	0.459997	1	0.342767	0.73677					0.566996	0.952798	0.789556	-0.00893989	0.1283	0.397529	0.634473	0.0193716	0.643469	0.8351	0.80396	0.443463	0.347364	0.412897	0.287931	0.233371	-0.214833	0.216605	-0.163359	0.216557	0.081024	0.891875	0.761742	0.179612
		77G7	-0.217549	-0.172267	0.000572343	-0.385343	0.395068	0.164009	0.134504	-0.335044	0.418877	0.342767	1	0.271928					0.0123318	0.243012	0.296933	-0.36047	-0.0683545	-0.124548	0.260145	-0.421411	0.279237	0.239632	0.432873	0.338001	0.335709	0.170866	0.487173	0.223713	-0.304348	-0.427739	0.615729	-0.42778	-0.421328	0.42029	0.464937	-0.150508
		TauAB	0.413139	0.660195	0.48074	-0.224199	0.426613	0.580174	-0.014002	-0.141966	0.749216	0.73677	0.271928	1					0.81631	0.778586	0.857737	0.258149	0.373747	0.594473	0.788567	0.0939941	0.908053	0.931866	0.906938	0.852439	0.837533	0.698752	0.5047	0.760556	-0.270887	0.281539	0.289688	0.281434	0.491302	0.435787	0.289658	-0.124403
	210-224 p3	Tau12
		HT7
		77G7
		TauAB
	212-224 p1	Tau12	0.665231	0.76537	0.331922	-0.246085	0.237048	0.527305	-0.27011	-0.305692	0.716817	0.566996	0.0123318	0.81631					1	0.713663	0.775018	0.497396	0.677511	0.787175	0.650122	0.209363	0.939969	0.86951	0.788632	0.76329	0.765104	0.618934	0.436138	0.64387	-0.420611	0.353019	0.18316	0.352979	0.463137	0.276131	0.0506214	0.108501
		HT7	0.396199	0.695022	0.547412	-0.0906554	0.7713	0.8811	0.0264455	-0.239442	0.465121	0.952798	0.243012	0.778586					0.713663	1	0.836391	0.168005	0.262183	0.475317	0.693787	0.144514	0.73969	0.87968	0.840602	0.479773	0.425455	0.390788	0.377001	0.275166	-0.187336	0.206968	-0.0951318	0.206928	0.209424	0.813199	0.629979	0.200403
		77G7	0.368302	0.615388	0.585828	-0.198538	0.49279	0.697374	-0.150444	-0.227052	0.732496	0.789556	0.296933	0.857737					0.775018	0.836391	1	0.0757259	0.255749	0.427499	0.838749	0.0755276	0.853347	0.881547	0.976702	0.767047	0.724978	0.57875	0.514352	0.583104	-0.299587	0.348623	0.222847	0.348642	0.284894	0.530919	0.322815	0.354896
		TauAB	0.368569	0.0893642	-0.0911635	-0.108646	0.102396	0.326665	0.0804004	0.369596	-0.0790538	-0.00893989	-0.36047	0.258149					0.497396	0.168005	0.0757259	1	0.333498	0.242054	-0.129601	0.0576373	0.43697	0.283009	0.110193	0.0816205	0.155048	-0.195044	-0.256044	0.026832	-0.203354	-0.225711	0.0839801	-0.225746	0.717058	-0.0155742	-0.128317	-0.183138
	225-240 p1	Tau12	0.904162	0.669224	0.26533	0.148598	-0.112915	-0.0857507	-0.494527	-0.254163	0.61272	0.1283	-0.0683545	0.373747					0.677511	0.262183	0.255749	0.333498	1	0.867	0.468122	0.558637	0.518763	0.332324	0.279495	0.417232	0.531445	0.458138	0.151791	0.531002	-0.0469504	0.0969194	0.0813669	0.0968694	-0.0227622	-0.00752365	-0.19019	-0.193686
		HT7	0.762607	0.901204	0.252212	0.00197527	0.00898867	0.108185	-0.457773	-0.415079	0.67188	0.397529	-0.124548	0.594473					0.787175	0.475317	0.427499	0.242054	0.867	1	0.556735	0.483361	0.628306	0.60767	0.4407	0.599222	0.591465	0.743906	0.272942	0.639389	-0.155501	0.466068	-0.0853155	0.465962	0.151284	0.122849	-0.0659774	-0.176685
		77G7	0.613609	0.718357	0.830326	0.205909	0.27523	0.361731	-0.28988	-0.142244	0.789987	0.634473	0.260145	0.788567					0.650122	0.693787	0.838749	-0.129601	0.468122	0.556735	1	0.460101	0.67458	0.675509	0.811589	0.709872	0.756413	0.66119	0.543291	0.720576	0.107054	0.317548	0.203122	0.317526	0.0747096	0.371202	0.185284	0.0862914
		TauAB	0.77345	0.564318	0.69799	0.865209	-0.155784	-0.134037	-0.606197	0.318417	0.108204	0.0193716	-0.421411	0.0939941					0.209363	0.144514	0.0755276	0.0576373	0.558637	0.483361	0.460101	1	0.00133214	-0.0164885	-0.0301074	0.0118388	0.0938132	0.160592	-0.11588	0.210631	0.741979	0.173309	-0.248213	0.173289	-0.0199927	-0.0624694	-0.301338	-0.164459
	225-240 p2	Tau12	0.489595	0.606253	0.311207	-0.387898	0.373504	0.594249	-0.120687	-0.263253	0.777456	0.643469	0.279237	0.908053					0.939969	0.73969	0.853347	0.43697	0.518763	0.628306	0.67458	0.00133214	1	0.92176	0.906534	0.846418	0.845255	0.605976	0.493788	0.69164	-0.504151	0.194555	0.383495	0.194504	0.456653	0.381933	0.190444	0.0448308
		HT7	0.340852	0.704893	0.337596	-0.37228	0.533293	0.744497	-0.0410787	-0.331753	0.667549	0.8351	0.239632	0.931866					0.86951	0.87968	0.881547	0.283009	0.332324	0.60767	0.675509	-0.0164885	0.92176	1	0.91656	0.787154	0.704034	0.656766	0.503644	0.584869	-0.450868	0.370608	0.147894	0.37053	0.44895	0.553449	0.374062	0.0838582
		77G7	0.334497	0.57038	0.498818	-0.309976	0.5331	0.694728	-0.0544363	-0.277247	0.77417	0.80396	0.432873	0.906938					0.788632	0.840602	0.976702	0.110193	0.279495	0.4407	0.811589	-0.0301074	0.906534	0.91656	1	0.809561	0.780288	0.596392	0.571519	0.624777	-0.389684	0.238599	0.327111	0.238584	0.279058	0.561641	0.386516	0.220153
		TauAB	0.320918	0.558103	0.269069	-0.366176	0.0278355	0.239571	-0.313896	-0.338676	0.882728	0.443463	0.338001	0.852439					0.76329	0.479773	0.767047	0.0816205	0.417232	0.599222	0.709872	0.0118388	0.846418	0.787154	0.809561	1	0.95247	0.866964	0.660116	0.923764	-0.41388	0.414895	0.543856	0.414817	0.361415	0.0688249	-0.107049	-0.0682718
	225-240p3	Tau12	0.464905	0.509043	0.362572	-0.259337	-0.025954	0.159279	-0.242604	-0.23726	0.906241	0.347364	0.335709	0.837533					0.765104	0.425455	0.724978	0.155048	0.531445	0.591465	0.756413	0.0938132	0.845255	0.704034	0.780288	0.95247	1	0.775451	0.647775	0.95087	-0.327626	0.256134	0.611891	0.256067	0.345149	0.0097463	-0.1325	-0.129815
		HT7	0.319256	0.726178	0.219658	-0.236255	-0.0962139	0.0345561	-0.388559	-0.536212	0.822977	0.412897	0.170866	0.698752					0.618934	0.390788	0.57875	-0.195044	0.458138	0.743906	0.66119	0.160592	0.605976	0.656766	0.596392	0.866964	0.775451	1	0.607881	0.866865	-0.276681	0.677141	0.202315	0.677033	0.143001	0.011802	-0.113338	-0.104961
		77G7	0.0805906	0.309441	0.211175	-0.305025	-0.0604511	0.184583	-0.0885526	-0.555506	0.564197	0.287931	0.487173	0.5047					0.436138	0.377001	0.514352	-0.256044	0.151791	0.272942	0.543291	-0.11588	0.493788	0.503644	0.571519	0.660116	0.647775	0.607881	1	0.581274	-0.320574	0.285325	0.534005	0.285266	0.0343171	0.0129122	-0.0145523	0.045159
		TauAB	0.444632	0.543434	0.343133	-0.138128	-0.193778	-0.0536461	-0.338291	-0.21143	0.872895	0.233371	0.223713	0.760556					0.64387	0.275166	0.583104	0.026832	0.531002	0.639389	0.720576	0.210631	0.69164	0.584869	0.624777	0.923764	0.95087	0.866865	0.581274	1	-0.176653	0.379881	0.523868	0.379781	0.304501	-0.139066	-0.275454	-0.26387
	386-406 p1	Tau12	0.233893	-0.0072902	0.566677	0.964297	-0.133809	-0.282343	-0.223787	0.646731	-0.366861	-0.214833	-0.304348	-0.270887					-0.420611	-0.187336	-0.299587	-0.203354	-0.0469504	-0.155501	0.107054	0.741979	-0.504151	-0.450868	-0.389684	-0.41388	-0.327626	-0.276681	-0.320574	-0.176653	1	-0.156159	-0.248452	-0.156174	-0.153818	-0.111111	-0.169975	-0.293347
		HT7	0.0940582	0.616258	0.11067	-0.0943652	-0.244154	0.0468345	-0.327327	-0.425818	0.314163	0.216605	-0.427739	0.281539					0.353019	0.206968	0.348623	-0.225711	0.0969194	0.466068	0.317548	0.173309	0.194555	0.370608	0.238599	0.414895	0.256134	0.677141	0.285325	0.379881	-0.156159	1	-0.349181	1	0.23563	-0.156159	-0.240357	0.365371
		77G7	-0.0379414	-0.270663	-0.0173775	-0.295493	-0.205761	-0.117962	-0.136499	0.0271962	0.416224	-0.163359	0.615729	0.289688					0.18316	-0.0951318	0.222847	0.0839801	0.0813669	-0.0853155	0.203122	-0.248213	0.383495	0.147894	0.327111	0.543856	0.611891	0.202315	0.534005	0.523868	-0.248452	-0.349181	1	-0.349215	0.128339	-0.248452	-0.31196	-0.280148
		TauAB	0.094043	0.616186	0.110689	-0.0943519	-0.244171	0.0468408	-0.327355	-0.425806	0.314129	0.216557	-0.42778	0.281434					0.352979	0.206928	0.348642	-0.225746	0.0968694	0.465962	0.317526	0.173289	0.194504	0.37053	0.238584	0.414817	0.256067	0.677033	0.285266	0.379781	-0.156174	1	-0.349215	1	0.235563	-0.156174	-0.240381	0.365595
	386-406 p2	Tau12	0.0878065	0.16163	0.0588009	-0.153196	-0.0241877	0.356387	0.147426	0.38577	0.00407012	0.081024	-0.421328	0.491302					0.463137	0.209424	0.284894	0.717058	-0.0227622	0.151284	0.0747096	-0.0199927	0.456653	0.44895	0.279058	0.361415	0.345149	0.143001	0.0343171	0.304501	-0.153818	0.23563	0.128339	0.235563	1	-0.153818	-0.236667	-0.138445
		HT7	0.0948331	0.333768	0.340847	-0.0865147	0.978715	0.79805	0.255435	-0.14838	0.175298	0.891875	0.42029	0.435787					0.276131	0.813199	0.530919	-0.0155742	-0.00752365	0.122849	0.371202	-0.0624694	0.381933	0.553449	0.561641	0.0688249	0.0097463	0.011802	0.0129122	-0.139066	-0.111111	-0.156159	-0.248452	-0.156174	-0.153818	1	0.922722	0.162239
		77G7	-0.13362	0.121756	0.152849	-0.202153	0.920204	0.658227	0.586177	-0.207793	0.0436696	0.761742	0.464937	0.289658					0.0506214	0.629979	0.322815	-0.128317	-0.19019	-0.0659774	0.185284	-0.301338	0.190444	0.374062	0.386516	-0.107049	-0.1325	-0.113338	-0.0145523	-0.275454	-0.169975	-0.240357	-0.31196	-0.240381	-0.236667	0.922722	1	0.110332
		TauAB	-0.0797804	0.0513566	0.0923167	-0.168423	0.124636	0.334523	-0.0638907	-0.289657	0.0252887	0.179612	-0.150508	-0.124403					0.108501	0.200403	0.354896	-0.183138	-0.193686	-0.176685	0.0862914	-0.164459	0.0448308	0.0838582	0.220153	-0.0682718	-0.129815	-0.104961	0.045159	-0.26387	-0.293347	0.365371	-0.280148	0.365595	-0.138445	0.162239	0.110332	1
	386-406 p3	Tau12
		HT7
		77G7
		TauAB
	407-438 p1	Tau12
		HT7
		77G7
		TauAB
	407-438 p2	Tau12
		HT7
		77G7
		TauAB
	407-438 p3	Tau12
		HT7
		77G7
		TauAB
SI	175-190 p1	HT7	0.481803	0.590213	0.360983	-0.226286	-0.108856	0.125104	-0.342657	-0.374642	0.893473	0.332039	0.299464	0.784486					0.768343	0.429822	0.701302	0.0545307	0.559956	0.65208	0.766086	0.155544	0.797274	0.690994	0.742006	0.945161	0.969277	0.842678	0.765578	0.939793	-0.309941	0.379931	0.560016	0.379861	0.270905	-0.0392913	-0.188682	-0.0790578
		77G7	0.496351	0.640732	0.455509	-0.126173	-0.0944126	0.155331	-0.356751	-0.318532	0.857106	0.367578	0.241957	0.80438					0.754805	0.469753	0.720229	0.0243828	0.525765	0.652679	0.8144	0.240743	0.7702	0.701849	0.743646	0.931148	0.947197	0.854345	0.768937	0.935737	-0.204009	0.435517	0.499326	0.43544	0.303376	-0.021642	-0.184342	-0.0852808
		TauAB	0.384152	0.584962	0.37869	-0.179509	-0.065353	0.0912321	-0.302846	-0.304394	0.869317	0.376707	0.336528	0.82008					0.665848	0.416559	0.665898	-0.0459968	0.459509	0.624702	0.772328	0.162396	0.731489	0.684842	0.715771	0.95113	0.945443	0.898203	0.718509	0.971045	-0.206659	0.396815	0.527695	0.396702	0.272737	-0.00108196	-0.134943	-0.233477
	210-224 p1	HT7	0.279552	-0.018342	0.614949	0.0811628	0.331477	0.367419	0.144836	0.361378	0.418713	0.296275	0.36883	0.506595					0.320914	0.370888	0.607981	0.177834	0.072558	-0.109366	0.591365	0.0476653	0.501289	0.332172	0.617555	0.36987	0.529017	-0.0150296	0.211846	0.353976	0.0448001	-0.33503	0.501576	-0.334962	0.21048	0.27969	0.202587	0.125035
		77G7	0.401106	0.29544	0.327182	-0.165771	-0.0556711	0.155787	-0.120449	0.161268	0.663795	0.179729	0.171625	0.77778					0.664925	0.28801	0.57999	0.440273	0.397224	0.403892	0.574125	0.0914007	0.769256	0.587432	0.637545	0.816413	0.897458	0.523908	0.409868	0.842134	-0.196726	0.0565443	0.660674	0.0564665	0.623025	-0.102297	-0.246036	-0.291798
		TauAB	0.21925	0.429954	0.261067	-0.232923	-0.204492	-0.0127806	-0.274917	-0.264108	0.775822	0.224495	0.322243	0.727394					0.545985	0.258577	0.560486	-0.0799042	0.314466	0.48738	0.647293	0.0571747	0.630596	0.58073	0.612646	0.924498	0.904319	0.85917	0.738553	0.949204	-0.221241	0.400917	0.611792	0.400803	0.322202	-0.162243	-0.260931	-0.260722
	210-224 p2	HT7	0.342299	0.434257	0.342162	-0.263256	-0.0398967	0.138382	-0.235795	-0.325593	0.852493	0.333564	0.490099	0.774345					0.656649	0.408815	0.675452	-0.0123211	0.424141	0.495343	0.735953	0.0380499	0.759422	0.654561	0.746999	0.92517	0.954863	0.769665	0.819605	0.907586	-0.297841	0.213528	0.700007	0.213444	0.221529	0.0104073	-0.106557	-0.167267
		77G7	0.234528	0.372548	0.320788	-0.358534	0.171051	0.344096	-0.145696	-0.357067	0.790271	0.47476	0.626401	0.786987					0.652905	0.541555	0.748694	-0.00446411	0.301153	0.385536	0.705473	-0.0968518	0.798094	0.728576	0.83081	0.883711	0.884504	0.668021	0.846075	0.774238	-0.384861	0.113448	0.710912	0.113377	0.191275	0.207234	0.0813977	-0.0754736
		TauAB	0.258388	0.549456	0.261682	-0.337433	0.0187506	0.195009	-0.230958	-0.374042	0.838442	0.443724	0.393305	0.84475					0.680191	0.466378	0.690265	-0.0181404	0.366319	0.585533	0.699995	0.0062021	0.771794	0.757866	0.755595	0.970224	0.922372	0.896179	0.745727	0.924468	-0.347191	0.405035	0.536875	0.404913	0.318582	0.0673662	-0.0573939	-0.206843
	210-224 p3	HT7	0.346243	0.535275	0.333383	-0.211697	-0.167454	0.0269671	-0.283546	-0.464731	0.843788	0.293028	0.362788	0.698046					0.610444	0.3568	0.611989	-0.172569	0.4397	0.569209	0.738481	0.110016	0.648579	0.595429	0.657414	0.886181	0.89691	0.867546	0.859347	0.906394	-0.254979	0.426077	0.531892	0.425993	0.136661	-0.0780111	-0.16428	-0.102457
		77G7	0.0801874	0.310119	0.095427	-0.223185	-0.306346	-0.0857537	-0.191528	-0.557081	0.502007	0.0826898	0.353858	0.377741					0.327556	0.160957	0.291297	-0.30491	0.2102	0.344731	0.425645	-0.0194686	0.333602	0.344323	0.350226	0.609657	0.590916	0.669974	0.942786	0.61698	-0.218132	0.363761	0.487533	0.363663	0.00839561	-0.218132	-0.256978	-0.1397
		TauAB	-0.0737997	0.183007	0.0878539	0.291466	0.0396511	0.0136403	0.360223	0.334874	-0.341275	0.0716404	-0.50135	0.101974					-0.153864	0.0230542	-0.226563	0.0975081	-0.197072	0.0790451	-0.0854262	0.213646	-0.220614	0.00689715	-0.235393	-0.189874	-0.219673	0.0417183	-0.264938	-0.0512342	0.396825	0.260099	-0.522964	0.259951	0.418668	-0.00721202	0.107926	-0.439972
	212-224 p1	HT7	0.269116	0.373042	0.237361	-0.315029	-0.151642	0.0278423	-0.337553	-0.307359	0.856952	0.230212	0.447605	0.711707					0.609663	0.277976	0.628981	-0.0280614	0.389652	0.467044	0.656009	-0.00463256	0.717349	0.592213	0.687273	0.950287	0.949356	0.795201	0.734455	0.931267	-0.339928	0.269949	0.731655	0.26988	0.232128	-0.107946	-0.242205	-0.144115
		77G7	0.320897	0.408196	0.307646	-0.256887	-0.0832364	0.025748	-0.308258	-0.369599	0.892886	0.290529	0.542764	0.707921					0.584618	0.328591	0.63015	-0.127918	0.4393	0.491305	0.722286	0.0399204	0.695334	0.579071	0.699764	0.914432	0.936921	0.795057	0.775956	0.91623	-0.28583	0.210272	0.703269	0.210197	0.083109	-0.0144813	-0.128875	-0.166102
		TauAB
	225-240 p1	HT7	0.40721	0.558797	0.293375	-0.300921	-0.0920001	0.118644	-0.313809	-0.3825	0.903735	0.342296	0.33413	0.800828					0.748039	0.410346	0.695447	0.0456594	0.51399	0.634663	0.730545	0.0787818	0.802776	0.705736	0.746701	0.972337	0.976065	0.867997	0.739736	0.955641	-0.363454	0.384194	0.577057	0.384113	0.287734	-0.0318981	-0.171534	-0.11214
		77G7	0.345718	0.565263	0.308266	-0.355608	0.0138965	0.264611	-0.244651	-0.413057	0.87024	0.442949	0.360183	0.84141					0.774991	0.515593	0.770391	0.0488109	0.426147	0.588529	0.742255	0.0105293	0.84133	0.784531	0.818576	0.972762	0.954187	0.846897	0.796523	0.901554	-0.415473	0.407098	0.551921	0.407023	0.327767	0.0663742	-0.0742464	-0.0280016
		TauAB	0.266899	0.59706	0.263018	-0.353606	0.0361469	0.247683	-0.238899	-0.386349	0.831764	0.478925	0.323206	0.86303					0.72333	0.505639	0.726829	0.014788	0.362594	0.612007	0.702347	0.0101286	0.796763	0.799916	0.777869	0.976782	0.912916	0.90988	0.72494	0.911427	-0.375978	0.47942	0.471717	0.479307	0.369111	0.0837979	-0.0542234	-0.139998
	225-240 p2	HT7	0.340725	0.594135	0.27644	-0.326052	-0.0646166	0.154206	-0.268903	-0.420043	0.875977	0.394809	0.305644	0.821226					0.731083	0.44313	0.700523	-0.00181015	0.445757	0.637617	0.722675	0.0499166	0.783113	0.740745	0.748622	0.972842	0.946238	0.912058	0.756276	0.944127	-0.371158	0.474407	0.500693	0.474312	0.315106	-0.00317151	-0.126797	-0.110307
		77G7	0.316795	0.586393	0.267132	-0.360754	-0.0332994	0.204618	-0.212863	-0.40977	0.859229	0.418603	0.288605	0.843363					0.747006	0.469181	0.721304	0.0344893	0.412289	0.618768	0.712774	0.0102755	0.804299	0.769995	0.769997	0.972324	0.94356	0.896183	0.75314	0.929136	-0.403893	0.481847	0.486256	0.481753	0.367937	0.0172825	-0.0975479	-0.0871678
		TauAB	0.285303	0.578237	0.233853	-0.338498	-0.056278	0.132922	-0.264116	-0.396103	0.853917	0.395708	0.311468	0.821216					0.690871	0.417883	0.665785	-0.0140442	0.406283	0.629349	0.684858	0.0291913	0.756602	0.734028	0.720364	0.972566	0.925127	0.928163	0.711983	0.945735	-0.360209	0.477489	0.490539	0.477375	0.328314	-0.00139506	-0.122574	-0.180667
	225-240p3	HT7	0.368438	0.657084	0.305266	-0.270475	-0.0812383	0.179424	-0.221456	-0.406895	0.810407	0.401296	0.177772	0.824019					0.743511	0.469241	0.675647	0.0311107	0.441984	0.672373	0.717472	0.10766	0.755997	0.74961	0.712859	0.928793	0.903845	0.911438	0.756533	0.915841	-0.320197	0.554581	0.387595	0.554473	0.389146	-0.0198591	-0.127416	-0.115579
		77G7	0.329195	0.592191	0.263845	-0.336873	-0.0609209	0.175706	-0.19513	-0.383372	0.841202	0.393154	0.248574	0.841832					0.738672	0.446574	0.687202	0.0555504	0.423485	0.633892	0.700004	0.033359	0.787533	0.754471	0.738433	0.960191	0.93881	0.897918	0.735631	0.937865	-0.375425	0.486679	0.468073	0.486573	0.397473	-0.0135565	-0.117594	-0.136858
		TauAB	0.299655	0.606309	0.245698	-0.246722	-0.109615	0.0419728	-0.232445	-0.366496	0.807214	0.3537	0.235158	0.788343					0.623203	0.363616	0.569609	-0.0566643	0.416551	0.660521	0.667292	0.105232	0.666093	0.669739	0.625199	0.914365	0.876734	0.943858	0.669159	0.945154	-0.251994	0.509797	0.399006	0.509656	0.316269	-0.0474963	-0.135704	-0.288388
	386-406 p1	HT7	0.123137	0.654943	0.119641	-0.217509	-0.183543	0.106052	-0.261416	-0.428062	0.49411	0.318093	-0.127102	0.586838					0.515478	0.331177	0.443794	-0.103024	0.194629	0.595155	0.451151	0.110271	0.447525	0.598393	0.428643	0.705035	0.562345	0.875645	0.576628	0.674828	-0.224872	0.837962	0.0239443	0.837843	0.403347	-0.11779	-0.204671	-0.0597374
		77G7	0.113748	0.642841	0.256258	-0.359264	0.128908	0.421353	-0.235198	-0.453464	0.661838	0.590181	0.172067	0.780774					0.667886	0.600446	0.76801	-0.0849445	0.146882	0.519309	0.637326	-0.0290869	0.698448	0.826212	0.761754	0.860662	0.709632	0.861024	0.691865	0.705916	-0.385022	0.700944	0.21169	0.700871	0.379884	0.183047	0.0274214	0.13517
		TauAB	0.224136	0.774817	0.230801	-0.250371	0.0572589	0.320316	-0.227124	-0.501009	0.599908	0.551251	-0.00443227	0.726563					0.657111	0.566929	0.621883	-0.0704878	0.274722	0.677223	0.590966	0.115422	0.606923	0.770723	0.616614	0.762127	0.62287	0.897124	0.622377	0.677791	-0.288429	0.787067	0	0.786953	0.357926	0.135719	0.0147367	0.0108813
	386-406 p2	HT7	0.233157	0.705098	0.280138	-0.283323	0.0689593	0.337884	-0.197418	-0.502067	0.675633	0.549671	0.181955	0.787583					0.6856	0.592055	0.680806	-0.0741318	0.287648	0.628921	0.665098	0.0669479	0.68474	0.799747	0.704841	0.841392	0.73907	0.893179	0.782974	0.753111	-0.314104	0.646128	0.219487	0.646009	0.337531	0.14204	0.0250706	-0.0403736
		77G7	0.229934	0.625236	0.310457	-0.341315	0.0706511	0.333675	-0.218739	-0.426382	0.785831	0.533616	0.280173	0.850121					0.720015	0.569511	0.776461	-0.0416303	0.28391	0.570953	0.724189	0.00566591	0.775915	0.823503	0.803677	0.944722	0.862076	0.895408	0.775352	0.847706	-0.371656	0.568277	0.390996	0.568186	0.369435	0.125176	-0.013419	-0.00312554
		TauAB	0.168713	0.553604	0.201941	-0.380221	0.00120128	0.236354	-0.214018	-0.432394	0.755831	0.447561	0.330268	0.807609					0.659209	0.473703	0.670006	-0.0431747	0.275021	0.555772	0.637518	-0.0423109	0.729497	0.766142	0.723832	0.939133	0.85325	0.897987	0.787181	0.860176	-0.382664	0.507101	0.468168	0.506979	0.357126	0.0491468	-0.0672543	-0.144001
	386-406 p3	HT7	0.129706	0.533257	0.112309	-0.2007	-0.299196	-0.0546124	-0.255312	-0.563413	0.536603	0.187844	0.119267	0.480997					0.419444	0.230879	0.345093	-0.272655	0.25125	0.530851	0.467735	0.0844838	0.372133	0.461408	0.370911	0.677641	0.598926	0.843977	0.817353	0.692616	-0.202046	0.650996	0.244025	0.650873	0.15319	-0.202046	-0.242993	-0.138718
		77G7	0.120532	0.493657	0.0749822	-0.16129	-0.123218	0.248739	-0.0428207	0.0210663	0.197557	0.212388	-0.449071	0.570308					0.522551	0.282783	0.343117	0.385222	0.086029	0.445045	0.233938	0.096145	0.447794	0.560526	0.318755	0.525797	0.424282	0.549646	0.228266	0.493231	-0.163946	0.663472	-0.0599778	0.663358	0.838569	-0.163946	-0.252667	-0.133529
		TauAB	-0.207985	-0.345531	-0.391837	-0.285915	-0.0794854	-0.0705526	0.74384	0.282079	-0.282877	-0.272496	-0.318017	-0.0415387					-0.103495	-0.272163	-0.321105	0.490413	-0.174031	-0.199868	-0.421332	-0.39502	-0.0670036	-0.132363	-0.24672	-0.221468	-0.109427	-0.30514	-0.32923	-0.12975	-0.219945	-0.193431	-0.106679	-0.193473	0.495457	-0.219945	0.0445336	-0.239757
	407-438 p1	HT7	0.261463	0.707724	0.184239	-0.128523	-0.245304	-0.0528107	-0.330144	-0.448261	0.625839	0.277413	-0.0812547	0.586867					0.509849	0.272937	0.416076	-0.180583	0.360855	0.698444	0.539713	0.225076	0.436667	0.538514	0.40943	0.731609	0.634614	0.945195	0.546003	0.780016	-0.149632	0.798469	0.0409703	0.798345	0.259924	-0.149632	-0.230076	-0.144955
		77G7
		TauAB	0.0211854	0.57772	0.0755113	-0.317917	-0.0880446	0.124274	-0.309334	-0.490533	0.576184	0.385101	0.147319	0.617075					0.479208	0.354804	0.492716	-0.209735	0.146802	0.538367	0.46974	-0.00329493	0.488451	0.632452	0.508118	0.786054	0.613771	0.91048	0.648592	0.709704	-0.294247	0.715658	0.202053	0.715529	0.271386	-0.0179663	-0.127682	-0.113216
	407-438 p2	HT7	0.355829	0.659872	0.261864	-0.132089	-0.266803	-0.114118	-0.367705	-0.441497	0.791752	0.248284	0.107385	0.646516					0.556754	0.258809	0.486403	-0.194788	0.472721	0.702702	0.658526	0.230144	0.530984	0.539493	0.503881	0.836996	0.799275	0.968519	0.640472	0.913195	-0.16484	0.643848	0.270166	0.643736	0.177176	-0.16484	-0.254083	-0.185479
		77G7
		TauAB	-0.354021	0.018436	-0.29584	-0.215363	-0.242572	-0.335667	0.411854	-0.165492	-0.000888541	-0.0976157	-0.199423	0.0366211					-0.233999	-0.258146	-0.246098	-0.283912	-0.228658	0.0520845	-0.144159	-0.242236	-0.220255	-0.0662909	-0.208813	0.0390397	-0.0108416	0.3298	-0.0275385	0.185203	-0.0785098	0.427236	-0.285275	0.427123	0.132559	-0.248621	0.00916533	-0.287504
	407-438 p3	HT7
		77G7
		TauAB
			Tau12	HT7	77G7	TauAB	Tau12	HT7	77G7	TauAB	Tau12	HT7	77G7	TauAB	Tau12	HT7	77G7	TauAB	Tau12	HT7	77G7	TauAB	Tau12	HT7	77G7	TauAB	Tau12	HT7	77G7	TauAB	Tau12	HT7	77G7	TauAB	Tau12	HT7	77G7	TauAB	Tau12	HT7	77G7	TauAB	Tau12	HT7	77G7	TauAB	Tau12	HT7	77G7
			175-190 p1				210-224 p1				210-224 p2				210-224 p3				212-224 p1				225-240 p1				225-240 p2				225-240p3				386-406 p1				386-406 p2				386-406 p3				407-438 p1
			TBS
[truncated: 51 more columns]
