# Supplementary material for: Tau protein profiling in tauopathies: a human brain study
Source: Mol Neurodegener. 2024 Jul 19;19:54. doi: 10.1186/s13024-024-00741-9 (PMC11264707; doi:10.1186/s13024-024-00741-9)
Supplement: Supplementary file 3 — Supplementary Material 3: Figure 12 [file 13024_2024_741_MOESM3_ESM.xlsx]

## Sheet: a) Ctrl
a)
			TBS																																												SI
			6-23				25-44				45-68 0N				68-97 1N				68-87 2N				212-221				243-254				275-286 3R				299-317 4R				354-369				407-438				6-23
		Ctrl	Tau12	HT7	77G7	TauAB	Tau12	HT7	77G7	TauAB	Tau12	HT7	77G7	TauAB	Tau12	HT7	77G7	TauAB	Tau12	HT7	77G7	TauAB	Tau12	HT7	77G7	TauAB	Tau12	HT7	77G7	TauAB	Tau12	HT7	77G7	TauAB	Tau12	HT7	77G7	TauAB	Tau12	HT7	77G7	TauAB	Tau12	HT7	77G7	TauAB	HT7	77G7	TauAB
TBS	175-190 p1	Tau12	0.775537	0.805676	0.693502	0.496563	0.737315	0.532349	0.714789	0.364254	0.725818	0.6098	0.699137	0.367393	0.753307	0.592636	0.653638	0.292394	0.652777	0.610881	0.621752	0.213486	0.827571	0.323912	0.693439	0.448396	0.832655	0.858287	0.782989	0.464076	0.713217	0.661831	0.782989	0.440611	0.747045	0.607269	0.757297	0.440141	0.648417	0.580408	0.799282	0.534284	0.610566	0.583269	0.667902	0.491045	0.90015	0.548237	0.274763
		HT7	0.726764	0.642593	0.306001	0.101653	0.69762	0.820833	0.323667	0.0331506	0.657435	0.667169	0.316492	0.0480036	0.560886	0.66366	0.244425	-0.102164	0.603637	0.699373	0.244852	-0.0251287	0.580325	0.635627	0.332018	0.060555	0.490365	0.717388	0.408337	0.082046	0.319161	0.335778	0.408337	0.0569535	0.320723	0.21717	0.522689	0.0337106	0.23831	0.190438	0.488718	0.113187	0.185409	0.17419	0.251888	0.0657683	0.627303	0.17126	-0.0820187
		77G7	0.691061	0.763547	0.828064	0.677185	0.728299	0.380773	0.770601	0.535986	0.708586	0.539324	0.818487	0.539468	0.710553	0.484906	0.772482	0.487501	0.597139	0.527664	0.756143	0.424215	0.855323	0.187065	0.821812	0.638614	0.891099	0.822929	0.874087	0.651138	0.817719	0.767742	0.874087	0.620619	0.841822	0.78472	0.774605	0.636265	0.784677	0.722824	0.864449	0.702937	0.751071	0.723413	0.781346	0.676391	0.92083	0.75272	0.523033
		TauAB	0.503144	0.633456	0.920291	0.871725	0.56381	0.264113	0.819901	0.813437	0.668946	0.40951	0.9141	0.801123	0.60929	0.321302	0.840609	0.724045	0.498625	0.404499	0.811098	0.646658	0.788727	0.0270455	0.869244	0.849475	0.886103	0.726196	0.874128	0.862163	0.92232	0.903271	0.874128	0.848748	0.905228	0.835216	0.713204	0.8339	0.903605	0.876712	0.839865	0.884342	0.876939	0.876292	0.778583	0.850782	0.790609	0.8656	0.771549
	210-224 p1	Tau12	0.559737	0.555878	0.533851	0.529307	0.507331	0.525618	0.359954	0.485104	0.83134	0.787565	0.629529	0.613006	0.383859	0.427163	0.393229	0.44391	0.23786	0.278573	0.310088	0.327042	0.559548	0.419225	0.588226	0.495555	0.542999	0.647832	0.518394	0.525208	0.441002	0.497364	0.518394	0.483373	0.408408	0.428302	0.586559	0.458367	0.495903	0.542545	0.608033	0.424431	0.47159	0.470641	0.253136	0.380891	0.445043	0.370439	0.305676
		HT7	0.58457	0.587758	0.352974	0.12958	0.44208	0.368452	0.366853	-0.0586337	0.474534	0.495317	0.400581	-0.0108253	0.477262	0.349391	0.296494	-0.0403127	0.347984	0.347772	0.255246	-0.127993	0.519578	0.168259	0.359941	0.0710502	0.52982	0.583651	0.489983	0.0929751	0.358253	0.244076	0.489983	0.0538843	0.432356	0.27442	0.440951	0.0919364	0.302854	0.21122	0.519069	0.183995	0.271242	0.197967	0.533676	0.147139	0.637682	0.18092	-0.174584
		77G7	0.424285	0.326879	0.12146	0.0053757	0.209772	0.0198298	0.247678	-0.168047	0.179655	0.238247	0.20729	-0.138134	0.268336	0.184151	0.145622	-0.185692	0.212644	0.0755948	0.0209764	-0.232573	0.27073	0.0585934	0.180528	-0.0538703	0.285037	0.352744	0.314462	-0.0438705	0.162419	0.00697875	0.314462	-0.0881114	0.240985	0.0650182	0.364531	-0.0330229	0.108471	0.0252713	0.259157	-6.42514e-05	0.0845823	0.0642059	0.178511	-0.0526688	0.473039	0.111081	-0.187606
		TauAB	0.331903	0.514847	0.410762	0.196449	0.337469	0.107097	0.455519	0.0816355	0.180312	0.0945286	0.330245	0.0585379	0.525433	0.203391	0.434683	0.17756	0.341069	0.347384	0.484422	0.0201484	0.448286	-0.23733	0.33325	0.183601	0.504166	0.371952	0.4311	0.177448	0.422693	0.314924	0.4311	0.184933	0.492065	0.389588	0.238693	0.179442	0.380674	0.328644	0.441596	0.327342	0.407181	0.347814	0.702492	0.349611	0.485684	0.144166	-0.00760455
	210-224 p2	Tau12	-0.153684	-0.0146586	0.223833	0.19067	-0.151508	0.0614657	0.368102	0.249096	-0.134965	-0.415002	0.148576	0.104098	0.182118	-0.0943318	0.277519	0.200946	0.403225	0.320405	0.276404	0.377589	0.0753608	-0.356044	0.076526	0.226989	0.184267	0.0109385	0.184509	0.214308	0.399438	0.320199	0.184509	0.270489	0.320969	0.0800903	-0.0599789	0.236938	0.269436	0.212428	0.0810347	0.334106	0.256185	0.261607	0.34723	0.303705	0.0779347	0.203454	0.32265
		HT7	0.334966	0.322417	0.368466	0.244386	0.233578	0.332155	0.429509	0.136215	0.335413	0.193421	0.403833	0.0936848	0.339905	0.201237	0.332492	0.0695676	0.471938	0.389617	0.27362	0.209074	0.403327	0.0983246	0.33351	0.216077	0.451208	0.439652	0.473731	0.232399	0.475125	0.374235	0.473731	0.220183	0.458842	0.239112	0.359408	0.258009	0.362224	0.248307	0.415005	0.316081	0.297261	0.256537	0.446432	0.251157	0.520572	0.399076	0.179509
		77G7	0.134173	-0.0872988	-0.633847	-0.713524	-0.00592821	0.241502	-0.597347	-0.695885	-0.0375088	0.348119	-0.551381	-0.618068	-0.243827	0.157572	-0.67645	-0.784318	-0.363174	-0.180561	-0.652598	-0.918058	-0.294647	0.574176	-0.545976	-0.767625	-0.431997	-0.0972742	-0.533814	-0.74346	-0.686442	-0.600356	-0.533814	-0.764518	-0.586481	-0.600887	-0.197685	-0.775293	-0.67932	-0.672932	-0.393388	-0.766683	-0.693277	-0.704986	-0.586102	-0.778014	-0.230536	-0.696757	-0.862495
		TauAB	0.0262897	0.127144	0.215655	0.115837	0.253558	0.139392	-0.0440814	0.114636	0.0981935	0.131235	0.13408	0.111166	0.0134394	-0.0394471	0.0700963	0.0509586	-0.118432	0.0812697	0.25694	0.0505624	0.162495	0.00615408	0.13165	0.106592	0.188773	0.100999	0.0949619	0.12301	0.118415	0.186305	0.0949619	0.105695	0.163967	0.310552	-0.0583723	0.100075	0.140089	0.118455	0.167379	0.174871	0.131216	0.0831131	0.424844	0.224419	0.189307	0.203729	0.142097
	210-224 p3	Tau12
		HT7
		77G7
		TauAB
	212-224 p1	Tau12	0.507058	0.535429	0.4682	0.271738	0.398914	0.279202	0.508784	0.10341	0.421873	0.347035	0.495812	0.0970606	0.491753	0.286916	0.42935	0.0872627	0.422793	0.359422	0.392264	0.0433057	0.555907	0.0751542	0.444278	0.221705	0.604706	0.573002	0.587215	0.239249	0.520215	0.401094	0.587215	0.214745	0.576598	0.383417	0.476147	0.25692	0.438382	0.325138	0.564692	0.352099	0.395796	0.330961	0.633878	0.308846	0.695896	0.385518	0.0670309
		HT7	0.603001	0.614569	0.38871	0.160403	0.479309	0.436895	0.405017	-0.00280511	0.507438	0.507765	0.424538	0.0297199	0.515536	0.388307	0.326982	-0.0171674	0.397658	0.412091	0.298949	-0.0978769	0.554772	0.207524	0.380066	0.1039	0.56576	0.621268	0.508727	0.126562	0.404646	0.309147	0.508728	0.0948983	0.470535	0.297454	0.459377	0.117848	0.337554	0.248005	0.543405	0.223781	0.302685	0.236042	0.554195	0.184037	0.662299	0.207695	-0.130602
		77G7	0.527003	0.580438	0.552306	0.355818	0.460143	0.297007	0.535394	0.188028	0.48309	0.399957	0.570963	0.191578	0.512725	0.292294	0.486628	0.170403	0.407158	0.367954	0.470577	0.110635	0.613576	0.0729262	0.520952	0.305903	0.668839	0.615061	0.641919	0.325796	0.577186	0.474256	0.641919	0.29669	0.634607	0.48179	0.506435	0.335701	0.511957	0.406683	0.632603	0.432087	0.471285	0.402732	0.714487	0.39748	0.738119	0.45963	0.145468
		TauAB	0.31388	0.0543447	-0.564537	-0.642079	0.161858	0.369683	-0.480526	-0.708413	0.0989301	0.41756	-0.479852	-0.598633	-0.06985	0.349854	-0.538946	-0.68931	-0.0256209	0.0805495	-0.596316	-0.645494	-0.171304	0.61472	-0.39801	-0.674886	-0.369499	0.0361736	-0.381619	-0.666319	-0.622944	-0.603861	-0.381619	-0.709538	-0.587043	-0.536036	-0.0194223	-0.691403	-0.608244	-0.590014	-0.273933	-0.744056	-0.618373	-0.614044	-0.639443	-0.759526	-0.137292	-0.625983	-0.78245
	225-240 p1	Tau12	0.663585	0.707947	0.72625	0.567904	0.682419	0.49134	0.724885	0.452315	0.660552	0.476843	0.711362	0.429771	0.694482	0.511989	0.689061	0.376148	0.692564	0.631563	0.665675	0.40902	0.787927	0.241098	0.711235	0.537938	0.806671	0.786722	0.789525	0.548622	0.759664	0.70772	0.789525	0.528545	0.754962	0.646922	0.70756	0.534122	0.689507	0.619521	0.772669	0.608652	0.64595	0.627908	0.67687	0.56874	0.852536	0.659718	0.450133
		HT7	0.640617	0.647094	0.543681	0.365043	0.679288	0.682124	0.515685	0.289503	0.641502	0.525087	0.521973	0.274075	0.60558	0.547659	0.476715	0.174945	0.657663	0.700928	0.489963	0.279549	0.673319	0.394545	0.524699	0.338661	0.648582	0.726446	0.594653	0.354732	0.56628	0.556633	0.594653	0.335074	0.547607	0.458877	0.563093	0.320567	0.487171	0.428941	0.625744	0.404484	0.437389	0.421506	0.5126	0.366421	0.71551	0.450307	0.264858
		77G7	0.662458	0.712905	0.768547	0.618952	0.723514	0.423531	0.731774	0.48292	0.660446	0.477615	0.743901	0.468812	0.689877	0.499664	0.732242	0.432593	0.668909	0.599715	0.721474	0.464101	0.813047	0.217795	0.768347	0.591033	0.827305	0.783048	0.826816	0.598915	0.773931	0.723882	0.826816	0.570669	0.775257	0.732557	0.734931	0.590552	0.726431	0.659405	0.806055	0.647532	0.686976	0.666147	0.712147	0.621837	0.881315	0.735276	0.523836
		TauAB	0.513852	0.606743	0.819353	0.736045	0.60283	0.372261	0.748828	0.669631	0.612942	0.362568	0.788973	0.634855	0.607894	0.375594	0.759968	0.571963	0.612334	0.541484	0.750431	0.624258	0.750185	0.102749	0.775094	0.721833	0.809725	0.703708	0.805029	0.730324	0.840319	0.814033	0.805029	0.715955	0.806953	0.747877	0.659034	0.708754	0.7929	0.747862	0.766749	0.763908	0.755946	0.756151	0.710057	0.732471	0.778003	0.802795	0.693255
	225-240 p2	Tau12	0.568263	0.58936	0.5467	0.350192	0.49234	0.242261	0.583531	0.14388	0.472253	0.380942	0.56671	0.141597	0.553428	0.344663	0.528803	0.165623	0.486306	0.386553	0.490562	0.126884	0.642271	0.103764	0.553862	0.30156	0.673597	0.628728	0.686909	0.314179	0.582269	0.459295	0.686909	0.282199	0.641082	0.504588	0.583615	0.347031	0.516033	0.397374	0.653228	0.417449	0.472373	0.404005	0.681248	0.38387	0.788826	0.509181	0.165329
		HT7	0.639167	0.648733	0.501389	0.27374	0.586309	0.403122	0.512007	0.0749806	0.526888	0.472077	0.509575	0.0874673	0.583191	0.43195	0.465875	0.0831993	0.52873	0.49709	0.449052	0.081642	0.65254	0.205335	0.511898	0.226295	0.651378	0.671543	0.637271	0.240896	0.515029	0.409486	0.637271	0.203149	0.567698	0.459424	0.562534	0.252552	0.44926	0.343549	0.63946	0.335498	0.407447	0.341836	0.639754	0.306862	0.781991	0.411882	0.067007
		77G7	0.58486	0.602609	0.593806	0.405884	0.569358	0.245244	0.599764	0.194571	0.489722	0.383903	0.595021	0.189259	0.56872	0.371439	0.577535	0.21544	0.527981	0.428711	0.55629	0.223811	0.680794	0.126418	0.612562	0.363516	0.698304	0.647796	0.725514	0.372598	0.61044	0.49901	0.725514	0.334489	0.659585	0.587321	0.620973	0.405295	0.555518	0.441444	0.686794	0.46025	0.511265	0.450097	0.694293	0.437347	0.828011	0.600661	0.270886
		TauAB	0.427075	0.520126	0.628017	0.474285	0.553311	0.465504	0.572895	0.380408	0.469263	0.246719	0.554713	0.328237	0.547708	0.35754	0.587933	0.353264	0.662207	0.661015	0.633771	0.536194	0.625354	0.0962162	0.574007	0.477007	0.643265	0.571982	0.640536	0.47982	0.660637	0.616041	0.640536	0.470163	0.616495	0.586261	0.453416	0.483381	0.587878	0.514417	0.618909	0.555822	0.547247	0.514208	0.685173	0.545364	0.654871	0.603889	0.482981
	225-240p3	Tau12	0.422174	0.287897	-0.353112	-0.464161	0.241453	0.327792	-0.187327	-0.456042	0.159927	0.430949	-0.304306	-0.37966	0.198631	0.441242	-0.299608	-0.489727	0.0115174	0.108499	-0.344409	-0.737011	0.0111852	0.485378	-0.260763	-0.506691	-0.122775	0.191796	-0.240191	-0.501961	-0.385524	-0.349707	-0.240191	-0.506311	-0.300351	-0.381775	0.104226	-0.566568	-0.382644	-0.330564	-0.111921	-0.517472	-0.353345	-0.326697	-0.415911	-0.532267	0.00401377	-0.632758	-0.730218
		HT7	0.0424089	0.187624	0.257198	0.237342	0.0192731	0.0502891	0.471884	0.22744	0.122097	-0.126959	0.193368	0.170433	0.402516	0.225849	0.421898	0.447889	0.468919	0.333068	0.38034	0.366395	0.235212	-0.123613	0.247816	0.287066	0.225823	0.115616	0.27384	0.256081	0.353563	0.3285	0.27384	0.322506	0.284259	0.198984	0.195568	0.314104	0.327622	0.335349	0.247381	0.317744	0.352991	0.33588	0.230294	0.326835	0.0506431	0.0989359	0.206942
		77G7	0.0025674	0.134354	0.301792	0.220073	0.268966	0.0752323	0.282285	0.136689	0.0524558	-0.153198	0.14605	0.0676135	0.28145	0.165895	0.391046	0.355302	0.443893	0.431515	0.516781	0.533855	0.270731	-0.071186	0.298084	0.279881	0.214685	0.07038	0.287732	0.249108	0.295657	0.300401	0.287733	0.271986	0.236114	0.440501	0.10618	0.328183	0.298404	0.260772	0.269799	0.312907	0.299566	0.24628	0.42204	0.385366	0.180922	0.366629	0.415854
		TauAB	-0.0384181	-0.221893	-0.415459	-0.27025	-0.223649	-0.254796	-0.36077	-0.258279	-0.143995	0.0607643	-0.287989	-0.157819	-0.308568	-0.0934817	-0.38361	-0.283339	-0.359724	-0.433342	-0.535108	-0.358944	-0.34068	0.0910352	-0.286386	-0.293805	-0.387474	-0.209072	-0.338507	-0.292253	-0.465405	-0.479064	-0.338507	-0.328801	-0.442953	-0.416077	-0.0718466	-0.328409	-0.39695	-0.32406	-0.345681	-0.435052	-0.373792	-0.306992	-0.666702	-0.462891	-0.308192	-0.369802	-0.362526
	386-406 p1	Tau12	0.302451	0.307651	0.457502	0.606264	0.254074	0.120473	0.429267	0.720627	0.501131	0.396194	0.53063	0.761992	0.268584	0.254022	0.41592	0.551435	0.102163	0.0122701	0.299711	0.324209	0.361206	0.213514	0.480187	0.587788	0.402313	0.411688	0.370852	0.598245	0.433849	0.529047	0.370852	0.601715	0.399179	0.346697	0.510632	0.513476	0.482148	0.583348	0.380878	0.477238	0.490782	0.584838	-0.0171233	0.426504	0.250837	0.380157	0.478006
		HT7	0.573641	0.595621	0.783488	0.768184	0.619948	0.0342708	0.758377	0.649935	0.596874	0.43415	0.798734	0.660836	0.578304	0.401049	0.791112	0.61986	0.431089	0.240017	0.725964	0.475833	0.753557	0.162503	0.846955	0.734892	0.779653	0.679017	0.829828	0.735313	0.751067	0.732151	0.829828	0.705055	0.778697	0.812811	0.834441	0.736629	0.776893	0.754848	0.776629	0.712593	0.758799	0.773306	0.534707	0.694641	0.809297	0.851108	0.682967
		77G7	-0.023081	-0.138229	-0.234149	-0.261908	-0.0681991	0.329502	-0.225012	-0.254465	-0.0944106	-0.090248	-0.213164	-0.281107	-0.145523	-0.0386644	-0.280094	-0.390975	0.195878	0.251995	-0.31622	0.0266745	-0.17954	0.0757984	-0.257669	-0.256476	-0.195464	-0.0460807	-0.17592	-0.246997	-0.162696	-0.228704	-0.17592	-0.271087	-0.240002	-0.337104	-0.193723	-0.27202	-0.258278	-0.300915	-0.216607	-0.257939	-0.302838	-0.279995	-0.207214	-0.306859	-0.0805534	-0.142873	-0.152819
		TauAB	0.482977	0.399346	0.31587	0.393433	0.502105	0.22274	0.249532	0.415995	0.543065	0.574009	0.370829	0.504831	0.296039	0.437781	0.291985	0.316986	0.140523	0.110873	0.216515	0.158584	0.391346	0.454021	0.430764	0.368274	0.321115	0.459367	0.308036	0.374166	0.210723	0.31101	0.308035	0.341795	0.207916	0.329359	0.556099	0.297015	0.294817	0.39039	0.3631	0.226383	0.303867	0.380846	-0.131667	0.209696	0.322222	0.275502	0.268612
	386-406 p2	Tau12	0.213878	0.339035	0.211727	0.0798822	0.213069	0.0632426	0.0430346	0.0218355	0.210146	0.321797	0.209129	0.101046	0.160888	0.0222533	0.090179	0.0443692	-0.205557	-0.0566237	0.163239	-0.240965	0.222224	-0.0977918	0.155744	0.039633	0.275675	0.221764	0.15174	0.0605014	0.102241	0.0917211	0.15174	0.0358815	0.209215	0.220078	0.0553858	0.0141273	0.1488	0.154561	0.252132	0.117304	0.177015	0.118463	0.441353	0.144774	0.230314	-0.0551172	-0.202008
		HT7	0.510011	0.538343	0.636986	0.694518	0.385767	0.161554	0.624181	0.725789	0.659383	0.558447	0.73392	0.77927	0.458398	0.337126	0.574159	0.568748	0.181449	0.0655388	0.441094	0.235931	0.579834	0.203532	0.649225	0.6454	0.653742	0.634811	0.602699	0.665731	0.623148	0.66099	0.602698	0.657554	0.641693	0.496315	0.696417	0.590217	0.649095	0.70218	0.613059	0.602704	0.64732	0.702625	0.273908	0.537234	0.536435	0.491495	0.432538
		77G7	0.40882	0.369065	0.377666	0.261922	0.241627	0.0498784	0.541033	0.0909327	0.296692	0.193653	0.436218	0.0585853	0.41017	0.239419	0.424819	0.100112	0.415882	0.208788	0.320067	0.056086	0.457587	0.0760378	0.407199	0.216533	0.496043	0.454648	0.555974	0.223169	0.480588	0.349951	0.555974	0.209941	0.526837	0.308908	0.521448	0.282761	0.395734	0.273309	0.469438	0.312719	0.346288	0.302049	0.426459	0.255034	0.619105	0.439479	0.14375
		TauAB	0.237935	-0.0352017	-0.618154	-0.69016	0.0741869	0.321612	-0.561041	-0.750088	0.0210331	0.362466	-0.52	-0.646604	-0.180672	0.236508	-0.6251	-0.776378	-0.127237	-0.00882314	-0.676557	-0.703091	-0.251985	0.566083	-0.472119	-0.730852	-0.424364	-0.0301032	-0.441571	-0.715523	-0.668938	-0.659569	-0.441571	-0.764683	-0.623608	-0.59836	-0.105228	-0.741582	-0.666084	-0.664307	-0.345809	-0.785406	-0.686056	-0.685383	-0.647528	-0.808651	-0.172065	-0.635424	-0.802516
	386-406 p3	Tau12
		HT7
		77G7
		TauAB
	407-438 p1	Tau12	0.324792	0.387671	0.722973	0.791121	0.416006	-0.173744	0.592732	0.662797	0.484701	0.313023	0.744109	0.716897	0.353251	0.1749	0.713547	0.754758	0.208444	0.022336	0.65143	0.634467	0.575525	-0.0298285	0.801427	0.78168	0.612436	0.444041	0.719891	0.777743	0.633837	0.619053	0.719891	0.739546	0.632115	0.799969	0.654949	0.799085	0.726822	0.735669	0.665499	0.705392	0.724844	0.722679	0.477179	0.715866	0.554682	0.828855	0.751414
		HT7
		77G7	0.145924	0.322834	0.345675	0.313725	0.119511	0.296602	0.224117	0.356185	0.388845	0.304941	0.351498	0.419348	0.245478	0.102608	0.243763	0.391415	0.0483407	0.161032	0.245953	0.197737	0.256116	-0.074378	0.265207	0.315885	0.317766	0.264075	0.222908	0.330901	0.301482	0.332151	0.222908	0.344359	0.277069	0.216035	0.103462	0.271327	0.331499	0.390794	0.315029	0.336612	0.356781	0.334418	0.357337	0.331874	0.0749543	0.00822452	0.0601327
		TauAB	-0.110038	-0.0654952	0.282378	0.502714	-0.206002	-0.248772	0.18414	0.519056	0.243457	0.118728	0.396926	0.611331	-0.0989411	-0.16508	0.241321	0.602355	-0.191529	-0.337444	0.0896763	0.456143	0.0412098	-0.162817	0.327656	0.510628	0.116596	0.0101717	0.214877	0.516882	0.238847	0.25331	0.214877	0.507905	0.173358	0.207064	0.192865	0.514477	0.339921	0.416304	0.182642	0.381574	0.350555	0.372488	-0.0316242	0.353129	-0.113998	0.296886	0.409535
	407-438 p2	Tau12
		HT7
		77G7
		TauAB
	407-438 p3	Tau12
		HT7
		77G7
		TauAB
SI	175-190 p1	HT7	0.556403	0.446409	0.0986352	-0.116035	0.497365	0.62351	0.132202	-0.194295	0.389143	0.472701	0.115115	-0.198166	0.357858	0.453445	0.0350943	-0.34986	0.400397	0.498258	0.0528687	-0.256334	0.368563	0.497383	0.105172	-0.167314	0.304599	0.51013	0.221123	-0.143608	0.129364	0.109167	0.221123	-0.172782	0.170981	0.0336764	0.310491	-0.175255	0.0304593	-0.0507122	0.27582	-0.0775741	-0.0249601	-0.0492471	0.183961	-0.122468	0.509183	0.0311993	-0.251141
		77G7	0.625839	0.667857	0.712863	0.548245	0.646274	0.382764	0.681305	0.393589	0.612556	0.456185	0.705803	0.382098	0.631539	0.43342	0.665079	0.348951	0.598635	0.529036	0.650089	0.368315	0.761871	0.184163	0.706082	0.511564	0.789792	0.740905	0.789538	0.524184	0.728617	0.658354	0.789538	0.493193	0.746954	0.66784	0.681256	0.526888	0.671506	0.583578	0.765164	0.591708	0.625521	0.587267	0.723953	0.560218	0.860889	0.686913	0.429347
		TauAB	0.315693	0.452549	0.825694	0.764382	0.457919	0.0294892	0.709234	0.685865	0.506304	0.121201	0.793333	0.635378	0.454275	0.0980998	0.751977	0.599337	0.426521	0.308771	0.760336	0.660687	0.702017	-0.257872	0.775432	0.751048	0.785221	0.587772	0.801757	0.758018	0.837302	0.810029	0.801757	0.739638	0.820902	0.792987	0.58757	0.759183	0.803197	0.736593	0.753635	0.801453	0.761441	0.748582	0.758948	0.782249	0.74461	0.892219	0.7776
	210-224 p1	HT7	0.607009	0.46992	-0.15928	-0.38183	0.511998	0.465644	0.0322779	-0.56264	0.279582	0.430048	-0.165813	-0.505329	0.452351	0.635744	-0.0346339	-0.406719	0.497323	0.518234	-0.0699561	-0.377594	0.274476	0.503521	-0.00884375	-0.400925	0.0761678	0.370248	0.0806144	-0.413477	-0.17701	-0.241163	0.0806143	-0.440736	-0.134378	-0.112071	0.310517	-0.398835	-0.203175	-0.235778	0.154901	-0.387351	-0.202362	-0.23493	-0.108094	-0.380554	0.310653	-0.32468	-0.576203
		77G7	0.288511	0.0770003	-0.0834358	-0.138544	0.236611	0.0532658	-0.155217	-0.270298	0.157344	0.360979	0.00774365	-0.21082	-0.0811967	0.113956	-0.155747	-0.364109	-0.112929	-0.116792	-0.175374	-0.323324	0.0903455	0.397441	0.0259374	-0.202881	0.0289039	0.184763	0.0595273	-0.178398	-0.142207	-0.155312	0.0595273	-0.248322	-0.0578597	0.000391622	0.219865	-0.166694	-0.135135	-0.205629	0.0667418	-0.213339	-0.189834	-0.213599	-0.0992004	-0.23672	0.299391	0.128266	-0.171668
		TauAB	0.291557	0.414094	0.473658	0.309689	0.226113	0.1537	0.389696	0.175539	0.355413	0.201702	0.490071	0.177689	0.322338	-0.00915089	0.36807	0.165412	0.229268	0.221241	0.361651	0.176804	0.452829	-0.319058	0.395104	0.276	0.547971	0.445065	0.514287	0.295841	0.49353	0.37055	0.514287	0.267474	0.530139	0.375793	0.260949	0.297903	0.433554	0.336889	0.51479	0.399451	0.401341	0.329527	0.703821	0.37166	0.544828	0.36266	0.144329
	210-224 p2	HT7	-0.295802	-0.23049	0.0855444	0.184258	-0.295773	-0.222306	-0.0545848	0.064764	-0.000912532	-0.125583	0.130023	0.137488	-0.229859	-0.304224	0.0614744	0.346341	-0.102201	-0.179834	0.00240312	0.497987	-0.114073	-0.318333	0.124853	0.222933	-0.0835964	-0.216768	0.0854807	0.219212	0.0437953	-0.0266936	0.0854808	0.196603	-0.0423737	0.102895	-0.116635	0.297838	0.116242	0.105434	0.0399609	0.161777	0.108046	0.038306	0.124352	0.179103	-0.225005	0.186334	0.216141
		77G7	0.0530338	0.209414	0.230003	0.0773042	0.128291	-0.0551271	0.12866	0.0247538	-0.0758972	-0.0813404	0.154385	-0.00411649	0.148158	-0.127614	0.157606	-0.00782078	-0.0200065	0.0691085	0.263442	-0.0651591	0.163368	-0.364481	0.105265	0.0590613	0.266435	0.106527	0.172514	0.0655484	0.208475	0.126125	0.172515	0.0544359	0.288289	0.241989	-0.0671929	0.0435946	0.177118	0.126877	0.172159	0.191096	0.194844	0.149886	0.575753	0.21934	0.277299	0.0973783	-0.00256362
		TauAB	-0.184165	-0.157447	-0.0694276	-0.0702261	-0.134949	0.473112	-0.240348	0.00771572	0.0117871	-0.0471085	-0.0707865	0.00337499	-0.221963	-0.203624	-0.223627	-0.125933	0.017648	0.20823	-0.187648	0.186239	-0.186177	-0.055409	-0.183876	-0.0531148	-0.126293	-0.081201	-0.170445	-0.0322088	-0.0499184	-0.0473545	-0.170445	-0.0428744	-0.146791	-0.19911	-0.356338	-0.0848498	-0.10619	-0.107914	-0.160223	-0.0433761	-0.137004	-0.133103	0.00812681	-0.0717361	-0.196683	-0.0923915	-0.00825769
	210-224 p3	HT7
		77G7
		TauAB	0.272242	0.265537	-0.165846	-0.290538	0.147608	0.181255	-0.277618	-0.338019	0.159473	0.519717	-0.120469	-0.224979	0.0116619	0.0729965	-0.27216	-0.343908	-0.31957	-0.123655	-0.24389	-0.565843	-0.00561197	0.105561	-0.1701	-0.339663	-0.0202632	0.130999	-0.15877	-0.317138	-0.280498	-0.310691	-0.15877	-0.356548	-0.162799	-0.170797	-0.0988105	-0.383907	-0.237722	-0.213802	-0.0231455	-0.30158	-0.205449	-0.241069	0.0360774	-0.289255	0.0353133	-0.439309	-0.583275
	212-224 p1	HT7	-0.043179	-0.0613603	-0.130723	-0.205369	-0.121848	0.0249472	-0.0946319	-0.244298	-0.240067	-0.23255	-0.129574	-0.280822	-0.0712289	-0.181062	-0.15453	-0.338275	0.0845543	0.0908027	-0.183888	-0.0969336	-0.135153	-0.272504	-0.1997	-0.214744	-0.0711992	-0.0625339	-0.0777821	-0.210242	-0.060649	-0.206275	-0.0777819	-0.232792	-0.0617471	-0.217134	-0.203115	-0.229449	-0.152684	-0.213844	-0.14977	-0.150161	-0.16516	-0.161573	0.0685158	-0.182265	0.0338246	-0.124708	-0.213889
		77G7	0.343436	0.275468	0.220093	0.0921252	0.186821	0.311323	0.244918	-0.0889833	0.353905	0.306519	0.302798	-0.0637964	0.227338	0.181541	0.171881	-0.0571045	0.34349	0.275256	0.0856809	0.0807122	0.315425	0.16659	0.249181	0.0554072	0.321379	0.378407	0.382653	0.0764323	0.278809	0.158834	0.382653	0.0385742	0.275954	0.122684	0.314974	0.12054	0.204336	0.0875096	0.350387	0.126882	0.136654	0.0647372	0.326213	0.0676509	0.429654	0.256704	-0.042513
		TauAB	-0.407819	-0.419171	-0.197536	-0.146594	-0.280559	0.346589	-0.291721	0.0125204	-0.276855	-0.364625	-0.236182	-0.074577	-0.364376	-0.284551	-0.303543	-0.197749	-0.0136711	0.143977	-0.221809	0.160117	-0.349665	0.0320994	-0.334046	-0.116743	-0.287909	-0.289022	-0.323405	-0.103181	-0.114814	-0.0484904	-0.323404	-0.0818293	-0.222386	-0.287735	-0.473677	-0.129274	-0.204861	-0.221494	-0.362809	-0.0961088	-0.250173	-0.221978	-0.154185	-0.122564	-0.324787	-0.056574	0.101325
	225-240 p1	HT7	0.592021	0.543105	0.420834	0.239325	0.616072	0.574588	0.429666	0.130871	0.514648	0.437465	0.407269	0.103255	0.514683	0.492668	0.379848	0.0233403	0.615245	0.622924	0.388339	0.176712	0.583849	0.399227	0.42746	0.207699	0.544794	0.636647	0.523245	0.221394	0.45751	0.423933	0.523245	0.194346	0.455852	0.373381	0.516764	0.212994	0.367877	0.280364	0.5266	0.278859	0.307904	0.285843	0.425611	0.240835	0.693557	0.426297	0.184644
		77G7	0.643026	0.666238	0.652131	0.473887	0.688579	0.490377	0.653709	0.345465	0.601295	0.444769	0.623167	0.313704	0.657895	0.5118	0.623777	0.278319	0.686365	0.641327	0.626321	0.350536	0.747842	0.279098	0.645899	0.445158	0.744557	0.740976	0.732101	0.454063	0.683422	0.634845	0.732101	0.432138	0.686257	0.607822	0.660054	0.451963	0.60853	0.524284	0.717649	0.524438	0.560017	0.533312	0.645132	0.494011	0.83503	0.62546	0.396168
		TauAB	0.34824	0.449322	0.697013	0.592895	0.511988	0.220658	0.623917	0.515849	0.447102	0.0893002	0.63363	0.445187	0.480168	0.208447	0.649766	0.428977	0.559424	0.490879	0.682514	0.598999	0.655867	-0.126227	0.64737	0.589676	0.690867	0.569613	0.701349	0.591609	0.729245	0.696382	0.701349	0.576991	0.696405	0.670683	0.509083	0.594408	0.664425	0.587161	0.659504	0.651029	0.618764	0.607071	0.677417	0.636019	0.708075	0.762394	0.650775
	225-240 p2	HT7	0.318506	0.288808	0.226549	0.0673716	0.339343	0.544907	0.26786	0.0252717	0.275961	0.170784	0.194798	-0.0494505	0.321604	0.301274	0.189104	-0.10023	0.538895	0.57744	0.220822	0.151498	0.336002	0.269651	0.175231	0.0564293	0.321542	0.388671	0.293551	0.0683353	0.321815	0.290761	0.293551	0.0673467	0.285745	0.138959	0.225052	0.0716447	0.193426	0.0965751	0.280571	0.155326	0.128846	0.105427	0.317473	0.113161	0.427985	0.254276	0.104714
		77G7	0.266027	0.301223	0.357579	0.197205	0.395623	0.484817	0.358179	0.142375	0.30834	0.143054	0.277702	0.0535382	0.372428	0.316414	0.33704	0.107455	0.562466	0.601369	0.430065	0.320166	0.423038	0.250958	0.305877	0.204263	0.397577	0.378627	0.387736	0.208123	0.42812	0.437091	0.387736	0.221037	0.387389	0.343231	0.262621	0.245485	0.329563	0.231229	0.386026	0.310538	0.26927	0.219037	0.476815	0.303441	0.453105	0.413739	0.316771
		TauAB	-0.120062	-0.062259	-0.0169572	-0.0765158	0.00629422	0.511752	-0.17565	-0.0313568	-0.00635885	-0.0940735	-0.071937	-0.057231	-0.097045	-0.108686	-0.139935	-0.121888	0.158532	0.363891	-0.0585229	0.227689	-0.0871816	-0.0742729	-0.132043	-0.0502606	-0.0580792	-0.029992	-0.103062	-0.03827	-0.0021212	-0.0110694	-0.103062	-0.0468472	-0.0927906	-0.0990037	-0.324312	-0.0774571	-0.0667491	-0.0852533	-0.0879035	-0.0163166	-0.0931048	-0.103011	0.1319	-0.0223644	-0.0940207	-0.0483306	0.0147466
	225-240p3	HT7	-0.23359	-0.259482	-0.186784	-0.183236	-0.170004	0.409573	-0.246505	-0.0423773	-0.0805779	-0.132953	-0.210598	-0.115156	-0.230115	-0.10432	-0.285901	-0.22593	0.06008	0.220682	-0.213826	0.0945564	-0.223297	0.142178	-0.292248	-0.159956	-0.216929	-0.144296	-0.268569	-0.143462	-0.105843	-0.0346814	-0.268569	-0.119462	-0.20354	-0.294337	-0.335379	-0.167255	-0.198295	-0.219997	-0.250378	-0.126249	-0.248943	-0.239146	-0.141679	-0.158256	-0.248765	-0.118359	-0.0014559
		77G7	-0.524311	-0.571546	-0.438806	-0.383579	-0.447239	-0.110708	-0.364249	-0.204346	-0.483208	-0.461402	-0.486703	-0.341288	-0.442243	-0.294267	-0.428209	-0.350022	-0.27175	-0.202637	-0.306776	-0.25237	-0.472848	0.0640815	-0.524494	-0.363002	-0.469445	-0.490202	-0.51017	-0.361903	-0.328622	-0.208871	-0.51017	-0.298863	-0.342863	-0.415508	-0.491108	-0.320348	-0.402005	-0.438754	-0.521626	-0.298648	-0.435658	-0.429504	-0.336968	-0.296803	-0.452208	-0.223455	-0.075569
		TauAB	0.171952	0.0417661	-0.463535	-0.555153	0.0751078	0.629593	-0.54368	-0.541149	0.0685536	0.407228	-0.430388	-0.4569	-0.149171	0.153858	-0.561766	-0.612061	-0.0909714	0.185399	-0.544913	-0.462994	-0.256293	0.40011	-0.464144	-0.570479	-0.340053	-0.0122086	-0.438358	-0.551085	-0.520265	-0.538525	-0.438358	-0.588774	-0.518898	-0.523383	-0.332832	-0.629998	-0.537155	-0.507682	-0.328271	-0.582765	-0.532936	-0.530793	-0.339407	-0.593452	-0.229875	-0.639889	-0.680765
	386-406 p1	HT7	-0.20512	-0.113897	0.216269	0.282804	-0.04975	-0.421538	0.00987293	0.122587	-0.0396772	-0.116626	0.194622	0.189144	-0.139773	-0.258455	0.210645	0.413539	-0.157921	-0.232438	0.236898	0.47339	0.0266601	-0.34708	0.277924	0.313825	0.0412537	-0.161775	0.1972	0.300035	0.0939901	0.0437952	0.1972	0.26131	0.0776582	0.391017	-3.21744e-06	0.379818	0.215449	0.20768	0.154552	0.252369	0.229521	0.161871	0.286881	0.322039	-0.0204421	0.376044	0.357123
		77G7	0.40882	0.369065	0.377666	0.261922	0.241627	0.0498784	0.541033	0.0909327	0.296692	0.193653	0.436218	0.0585853	0.41017	0.239419	0.424819	0.100112	0.415882	0.208788	0.320067	0.056086	0.457587	0.0760378	0.407199	0.216533	0.496043	0.454648	0.555974	0.223169	0.480588	0.349951	0.555974	0.209941	0.526837	0.308908	0.521448	0.282761	0.395734	0.273309	0.469438	0.312719	0.346288	0.302049	0.426459	0.255034	0.619105	0.439479	0.14375
		TauAB
	386-406 p2	HT7	0.285184	0.314754	0.302112	0.144738	0.174127	0.255389	0.294592	0.071163	0.289896	0.263951	0.343274	0.0507228	0.248493	0.100358	0.200471	-0.0332908	0.152185	0.169467	0.205033	-0.113412	0.338306	0.0734247	0.223834	0.0912216	0.418516	0.382177	0.348841	0.121619	0.364554	0.307247	0.348841	0.113607	0.425625	0.189729	0.234749	0.125816	0.276073	0.171704	0.354362	0.239968	0.22576	0.161495	0.507949	0.190365	0.46299	0.231682	-0.0245011
		77G7	-0.262745	-0.267197	-0.318797	-0.335939	-0.214159	-0.00349884	-0.112287	-0.169532	-0.313584	-0.30637	-0.399249	-0.309466	-0.088191	0.0204442	-0.219378	-0.245431	-0.0415935	0.00056532	-0.10402	-0.344986	-0.233502	0.184255	-0.380209	-0.31701	-0.274105	-0.268818	-0.35637	-0.328694	-0.200549	-0.0697036	-0.35637	-0.240737	-0.184349	-0.295279	-0.256443	-0.290687	-0.273378	-0.289122	-0.328853	-0.229603	-0.278861	-0.270674	-0.244628	-0.216548	-0.275918	-0.282619	-0.157619
		TauAB	0.379835	0.468315	0.149027	-0.0517747	0.259747	0.246355	0.106795	-0.136847	0.284055	0.413705	0.158694	-0.0873577	0.302731	0.151295	0.0663716	-0.136094	0.0108251	0.133839	0.095129	-0.327579	0.289209	-0.0778906	0.0915803	-0.0972812	0.31533	0.361624	0.178985	-0.0785674	0.111274	0.0353753	0.178985	-0.0994042	0.215351	0.0865782	0.101537	-0.119306	0.0890342	0.0546072	0.278701	0.0189854	0.10243	0.0427499	0.424205	0.0165576	0.338819	-0.150406	-0.343394
	386-406 p3	HT7
		77G7
		TauAB	0.154036	0.291512	0.128698	0.0117622	0.104817	0.0148498	-0.026753	-0.0207118	0.164888	0.331159	0.140632	0.0532903	0.0874881	-0.0827366	0.00110565	-0.0220575	-0.294987	-0.142343	0.0591367	-0.294766	0.134914	-0.226277	0.0552877	-0.0281112	0.205328	0.162778	0.0610438	-0.00644999	0.0332624	0.00973526	0.0610437	-0.027093	0.141743	0.105479	-0.0502914	-0.0604474	0.0712468	0.0815966	0.170587	0.0503574	0.102824	0.0522073	0.366539	0.0684452	0.142615	-0.151911	-0.257984
	407-438 p1	HT7
		77G7
		TauAB	0.422336	0.369554	0.363972	0.244971	0.216941	-0.0231705	0.541013	0.0760243	0.319621	0.164391	0.428953	0.0380023	0.41176	0.219027	0.413578	0.078995	0.407733	0.179021	0.30207	0.0527639	0.482722	0.00161159	0.40001	0.200122	0.504641	0.487699	0.565664	0.205681	0.473504	0.337035	0.565665	0.191585	0.523471	0.290276	0.556882	0.265955	0.382838	0.252881	0.49147	0.297031	0.330215	0.286025	0.414295	0.238531	0.641902	0.428179	0.14375
	407-438 p2	HT7
		77G7
		TauAB	0.287042	-0.0304583	-0.663868	-0.693413	0.10883	0.383836	-0.579092	-0.73115	0.0040867	0.466447	-0.58583	-0.634034	-0.165454	0.349532	-0.627768	-0.741723	-0.0860585	0.0286698	-0.690333	-0.6524	-0.309359	0.739775	-0.512328	-0.718667	-0.497755	-0.0566999	-0.498944	-0.714512	-0.717589	-0.735264	-0.498944	-0.759701	-0.685532	-0.624223	-0.116524	-0.749269	-0.702772	-0.670553	-0.428035	-0.803595	-0.698009	-0.668625	-0.722551	-0.815022	-0.232249	-0.67558	-0.77328
	407-438 p3	HT7
		77G7
		TauAB
			Tau12	HT7	77G7	TauAB	Tau12	HT7	77G7	TauAB	Tau12	HT7	77G7	TauAB	Tau12	HT7	77G7	TauAB	Tau12	HT7	77G7	TauAB	Tau12	HT7	77G7	TauAB	Tau12	HT7	77G7	TauAB	Tau12	HT7	77G7	TauAB	Tau12	HT7	77G7	TauAB	Tau12	HT7	77G7	TauAB	Tau12	HT7	77G7	TauAB	HT7	77G7	TauAB
			6-23				25-44				45-68 0N				68-97 1N				68-87 2N				212-221				243-254				275-286 3R				299-317 4R				354-369				407-438				6-23
			TBS																																												SI
[truncated: 33 more columns]

## Sheet: b) AD
b)
			TBS																																												SI
			6-23				25-44				45-68 0N				68-97 1N				68-87 2N				212-221				243-254				275-286 3R				299-317 4R				354-369				407-438				6-23
		AD	Tau12	HT7	77G7	TauAB	Tau12	HT7	77G7	TauAB	Tau12	HT7	77G7	TauAB	Tau12	HT7	77G7	TauAB	Tau12	HT7	77G7	TauAB	Tau12	HT7	77G7	TauAB	Tau12	HT7	77G7	TauAB	Tau12	HT7	77G7	TauAB	Tau12	HT7	77G7	TauAB	Tau12	HT7	77G7	TauAB	Tau12	HT7	77G7	TauAB	HT7	77G7	TauAB
TBS	175-190 p1	Tau12	0.854098	0.818152	0.686917	0.592493	0.399571	0.547319	0.681782	0.490163	0.884638	0.800697	0.692845	0.588649	0.698164	0.633167	0.601507	0.498422	0.494364	0.463885	0.609082	0.685371	0.755806	0.682124	0.666902	0.389719	0.942292	0.962464	0.928691	0.565184	0.863194	0.798635	0.928691	0.49177	0.845389	0.434602	0.943086	0.533714	0.677725	0.481266	0.757998	0.482113	0.528188	0.440073	0.608752	0.383483	-0.130706	0.240951	0.0489025
		HT7	0.457089	0.246077	0.129632	-0.077693	0.0447507	0.168713	0.112037	-0.180792	0.470541	0.5056	0.211262	-0.0113744	0.269272	0.275908	-0.0207408	-0.200743	0.175764	0.157632	0.10246	0.0618174	0.2298	0.391501	0.110276	-0.141417	0.349163	0.474658	0.370247	0.159896	0.198765	0.237721	0.370248	0.107417	0.240736	0.264245	0.738193	0.236815	0.207053	0.210473	0.445156	0.200534	0.00692619	-0.0628166	0.0566596	-0.151593	-0.477556	0.0209463	-0.187375
		77G7	0.628306	0.709768	0.827575	0.799145	0.167161	0.233388	0.790015	0.49524	0.724991	0.69829	0.824848	0.790436	0.480388	0.4102	0.721411	0.694184	0.140815	0.147344	0.551538	0.648499	0.687128	0.566699	0.765771	0.672438	0.759941	0.879303	0.915916	0.518432	0.707628	0.647997	0.915916	0.401081	0.848967	0.417868	0.828424	0.52236	0.606402	0.444142	0.654865	0.387406	0.748575	0.707138	0.770901	0.633163	-0.249936	0.189063	-0.0640201
		TauAB	0.208557	0.219107	0.284602	0.657792	-0.238421	0.115045	0.301125	0.623019	0.281753	0.183522	0.2465	0.470783	0.0248466	-0.0657844	0.181905	0.517913	0.0174749	-0.0493751	0.159038	0.351985	0.116256	-0.0214962	0.19183	0.219845	0.519273	0.755603	0.632151	0.97218	0.685114	0.868308	0.632151	0.923634	0.79786	0.795492	0.506115	0.97185	0.938212	0.944659	0.910911	0.928224	0.167911	0.17493	0.21474	0.137961	0.348598	0.73507	0.270494
	210-224 p1	Tau12	0.582309	0.401361	-0.00343987	-0.254044	0.642956	0.487984	0.0446962	-0.0355292	0.390984	0.242507	-0.0567759	-0.258024	0.61026	0.515602	0.0551568	-0.12914	0.522304	0.458159	0.0687455	0.188721	0.376777	0.457108	0.0645961	-0.227628	0.432943	0.278657	0.121273	-0.0633887	0.468111	0.329695	0.121273	-0.0114862	0.0647583	-0.0768372	0.275775	-0.134805	0.0379341	-0.0624167	0.057012	-0.00907651	-0.0711051	-0.2191	-0.0813212	-0.137443	-0.312145	-0.324797	-0.259637
		HT7	0.0628928	-0.221094	-0.424584	-0.332978	-0.170355	0.221314	-0.348494	-0.252141	0.0392128	0.074535	-0.352852	-0.34962	-0.0948428	-0.0485103	-0.538665	-0.451753	0.226436	0.164353	-0.188149	-0.188921	-0.288955	-0.0845651	-0.439141	-0.591415	0.0415738	0.163234	0.01673	0.384751	0.0368063	0.244362	0.0167303	0.433257	0.045851	0.344814	0.362361	0.46489	0.354151	0.453695	0.534947	0.51562	-0.573043	-0.57197	-0.491084	-0.626593	0.080519	0.334469	0.0402556
		77G7	-0.446159	-0.506941	-0.421292	-0.123421	-0.246901	-0.230747	-0.373938	-0.175916	-0.477917	-0.489135	-0.451741	-0.267301	-0.425574	-0.454097	-0.35608	-0.0343953	-0.237793	-0.2854	-0.506015	-0.189111	-0.474348	-0.588656	-0.437574	-0.229338	-0.370247	-0.33846	-0.438558	0.130862	-0.118084	-0.0385334	-0.438558	0.190672	-0.289138	-0.13231	-0.642051	0.106324	-0.0366181	0.181327	-0.168344	0.146541	-0.36448	-0.308166	-0.401752	-0.292403	0.564888	0.0584984	-0.124557
		TauAB	-0.125831	-0.249964	-0.244824	0.200345	-0.460369	-0.0546797	-0.208768	0.280991	-0.0810963	-0.155443	-0.251542	-0.00722496	-0.311647	-0.375386	-0.350906	0.0557946	-0.122721	-0.216335	-0.283642	-0.0686075	-0.349096	-0.39918	-0.334428	-0.27536	0.137147	0.418499	0.188897	0.883096	0.360308	0.652716	0.188897	0.88691	0.410278	0.730804	0.197416	0.916796	0.772181	0.946728	0.768105	0.933641	-0.35553	-0.329786	-0.306908	-0.370138	0.467297	0.711802	0.220664
	210-224 p2	Tau12	-0.0384351	-0.173505	-0.275904	0.140503	-0.344037	0.112653	-0.226772	0.340276	-0.0120923	-0.108126	-0.279591	-0.0505171	-0.206614	-0.251856	-0.361395	-0.00380172	0.0653707	-0.0337879	-0.176757	-0.0294392	-0.297293	-0.334703	-0.340263	-0.359352	0.21816	0.425164	0.205842	0.878822	0.403003	0.685971	0.205842	0.903723	0.417337	0.725778	0.232248	0.889146	0.791965	0.916207	0.790262	0.942604	-0.420672	-0.404991	-0.335223	-0.432184	0.561125	0.765245	0.364489
		HT7	-0.103672	-0.342336	-0.461594	-0.219552	-0.45529	-0.0725617	-0.43855	-0.0927462	-0.0874398	-0.103629	-0.402294	-0.347779	-0.287525	-0.290781	-0.594156	-0.385419	-0.0954995	-0.181389	-0.386326	-0.330555	-0.427969	-0.316443	-0.519102	-0.595434	-0.00191758	0.268479	-0.00733285	0.577508	0.0654219	0.355354	-0.00733261	0.57634	0.088776	0.551215	0.281752	0.652002	0.453592	0.680851	0.593723	0.693107	-0.598313	-0.595151	-0.523099	-0.662087	0.269882	0.575989	0.158884
		77G7	-0.19849	-0.322569	-0.351628	0.106025	-0.477998	-0.0795829	-0.306827	0.246717	-0.177166	-0.258782	-0.366913	-0.113738	-0.351751	-0.414794	-0.442021	-0.0249354	-0.147842	-0.246531	-0.35222	-0.163374	-0.429528	-0.4511	-0.43422	-0.364662	0.0577761	0.338183	0.0879931	0.839909	0.291885	0.598009	0.0879932	0.854958	0.320215	0.706261	0.123009	0.873153	0.718983	0.909541	0.709521	0.912739	-0.454618	-0.427364	-0.412953	-0.447898	0.475562	0.704926	0.236448
		TauAB	0.0206635	-0.105925	-0.208996	0.20212	-0.307001	0.0865633	-0.164454	0.365823	0.026881	-0.0931708	-0.231315	-0.0222198	-0.137583	-0.217374	-0.287234	0.0805887	0.0196262	-0.0893637	-0.198544	0.00764673	-0.225437	-0.281559	-0.278573	-0.294646	0.283493	0.516863	0.254154	0.90534	0.49651	0.756115	0.254154	0.911632	0.456755	0.724031	0.266434	0.906454	0.805182	0.942175	0.793938	0.955818	-0.345083	-0.347514	-0.281105	-0.365397	0.512992	0.727455	0.275065
	210-224 p3	Tau12	-0.104226	-0.305083	-0.371576	0.0106666	-0.439233	0.0197813	-0.320612	0.151404	-0.0859556	-0.143648	-0.360275	-0.164199	-0.314521	-0.34439	-0.48365	-0.127712	0.00140776	-0.0944934	-0.281258	-0.119983	-0.405639	-0.388028	-0.438776	-0.442622	0.0867497	0.319395	0.0966032	0.796188	0.265229	0.567861	0.0966033	0.827653	0.29599	0.695441	0.20065	0.836737	0.689531	0.863583	0.739474	0.882364	-0.507276	-0.487086	-0.438512	-0.525914	0.455832	0.690615	0.258276
		HT7	-0.432307	-0.613487	-0.573819	-0.351655	-0.678704	-0.430188	-0.618519	-0.187407	-0.345469	-0.32972	-0.49588	-0.423091	-0.606777	-0.599595	-0.722222	-0.552018	-0.428297	-0.475084	-0.599332	-0.613416	-0.660725	-0.567902	-0.652293	-0.614073	-0.344668	-0.0318287	-0.265526	0.31747	-0.278383	0.0326857	-0.265525	0.312308	-0.124698	0.496471	0.00332603	0.423029	0.210564	0.495587	0.307171	0.439405	-0.627106	-0.604448	-0.58902	-0.685045	0.0891993	0.417226	0.140705
		77G7	-0.141086	-0.287882	-0.290852	0.00090634	-0.394403	-0.225299	-0.328665	0.108803	-0.0571584	-0.139375	-0.254467	-0.134337	-0.303499	-0.398045	-0.412677	-0.180963	-0.308655	-0.389404	-0.519017	-0.295373	-0.348044	-0.406336	-0.389111	-0.38144	0.0634456	0.381617	0.0790712	0.628837	0.257636	0.500119	0.0790713	0.607643	0.262413	0.587946	0.165376	0.680139	0.563772	0.793983	0.546319	0.689836	-0.360196	-0.383521	-0.330463	-0.461004	0.143419	0.396147	-0.0198512
		TauAB	-0.0256481	-0.142292	-0.12993	0.263017	-0.434902	-0.141143	-0.137773	0.327846	0.017829	-0.0959776	-0.142102	0.0227664	-0.223051	-0.326118	-0.232141	0.130046	-0.205127	-0.307558	-0.302514	-0.0331104	-0.22761	-0.34117	-0.223596	-0.198424	0.237901	0.542713	0.24268	0.86404	0.456614	0.70682	0.24268	0.826565	0.431222	0.718016	0.228524	0.873769	0.721425	0.933333	0.712164	0.882975	-0.23435	-0.244145	-0.193764	-0.292496	0.449338	0.672055	0.175222
	212-224 p1	Tau12	0.0672151	-0.0807818	-0.231295	0.14122	-0.227041	0.195432	-0.180616	0.370358	0.0779905	-0.0420422	-0.242597	-0.0370156	-0.0983363	-0.162276	-0.313142	0.00519415	0.146305	0.0428207	-0.139833	0.02246	-0.208202	-0.242709	-0.289802	-0.35166	0.310398	0.495106	0.267094	0.876243	0.500235	0.755945	0.267094	0.907002	0.475325	0.733522	0.30351	0.877553	0.827542	0.916517	0.818613	0.941921	-0.383218	-0.39195	-0.3008	-0.410141	0.476509	0.713329	0.32434
		HT7	-0.0136039	-0.271813	-0.395679	-0.142647	-0.339915	0.0556336	-0.352063	-0.0183461	-0.00405355	-0.0408381	-0.355343	-0.256491	-0.224453	-0.248572	-0.528281	-0.292909	0.0369902	-0.0525446	-0.320615	-0.189288	-0.357801	-0.268707	-0.454491	-0.533007	0.0954485	0.326481	0.0871985	0.657623	0.219012	0.491922	0.0871987	0.686645	0.228265	0.610665	0.317581	0.722495	0.591715	0.759981	0.695103	0.767917	-0.536886	-0.544144	-0.470596	-0.599741	0.206216	0.507357	0.099192
		77G7	-0.0749155	-0.212675	-0.264471	0.140607	-0.444307	-0.0749939	-0.243488	0.30171	-0.0531942	-0.161479	-0.279205	-0.0820054	-0.258688	-0.343805	-0.373849	-0.00627612	-0.137668	-0.242006	-0.311923	-0.12559	-0.325067	-0.352387	-0.35119	-0.336946	0.176043	0.478157	0.18937	0.8664	0.389416	0.684008	0.18937	0.859425	0.402739	0.782864	0.261327	0.8957	0.758229	0.942282	0.770457	0.932681	-0.383581	-0.38694	-0.338783	-0.413689	0.378949	0.708764	0.233317
		TauAB	0.0551939	-0.071307	-0.153837	0.244081	-0.250992	0.135764	-0.0950979	0.307211	0.0705102	-0.0192108	-0.165572	0.0445025	-0.0951136	-0.167533	-0.235916	0.124272	0.0442026	-0.0565987	-0.173361	0.0632788	-0.176803	-0.225614	-0.225896	-0.233767	0.306325	0.535691	0.30511	0.900341	0.514233	0.751056	0.30511	0.90558	0.48453	0.654742	0.309915	0.913676	0.815391	0.934347	0.809552	0.94045	-0.285838	-0.279287	-0.226396	-0.312078	0.457788	0.647478	0.159829
	225-240 p1	Tau12	0.680867	0.756011	0.726893	0.79412	0.346336	0.585287	0.745549	0.737993	0.753538	0.666837	0.698017	0.790407	0.548256	0.497028	0.669675	0.699889	0.527784	0.516589	0.730577	0.794902	0.676751	0.524621	0.697728	0.550991	0.875545	0.841223	0.942754	0.68033	0.871474	0.835541	0.942754	0.649119	0.975204	0.526304	0.751674	0.630625	0.836416	0.557551	0.80362	0.572882	0.595984	0.562424	0.675545	0.533411	0.0791699	0.419022	0.279139
		HT7	0.833086	0.828202	0.727604	0.658985	0.452413	0.609026	0.719827	0.632206	0.880894	0.772944	0.715204	0.676188	0.665894	0.603479	0.666315	0.581969	0.597283	0.577029	0.706148	0.794212	0.76766	0.621256	0.716295	0.463533	0.946046	0.877254	0.922732	0.56009	0.901055	0.818137	0.922732	0.522275	0.900968	0.455245	0.804479	0.49667	0.715599	0.458819	0.723259	0.457804	0.581039	0.499694	0.668425	0.459944	-0.0191979	0.277861	0.191796
		77G7	0.387462	0.465716	0.595214	0.802952	-0.0311116	0.229269	0.602567	0.604355	0.497365	0.459527	0.575325	0.736328	0.226766	0.161347	0.481531	0.66066	0.114148	0.0988327	0.425851	0.545798	0.397288	0.279067	0.510204	0.515145	0.633005	0.805077	0.833156	0.787945	0.695426	0.76879	0.833156	0.719374	0.907374	0.642799	0.697378	0.805481	0.859989	0.728941	0.854858	0.698562	0.501558	0.507596	0.535619	0.450152	0.00164055	0.479028	0.113249
		TauAB	0.145095	0.108711	0.107178	0.519139	-0.229659	0.205944	0.158411	0.571341	0.194352	0.0968788	0.0698571	0.336585	-0.0334082	-0.102883	0.0167252	0.387431	0.127296	0.0499235	0.113913	0.294135	-0.00962328	-0.108534	0.0286522	0.0472378	0.445711	0.640524	0.523119	0.986328	0.634019	0.852221	0.523119	0.983394	0.72498	0.795897	0.421576	0.985456	0.95783	0.962824	0.926809	0.980498	-0.0262413	-0.00801764	0.0363125	-0.0296003	0.458525	0.785946	0.339601
	225-240 p2	Tau12	0.244651	0.120288	-0.0917571	0.208523	-0.0643365	0.337318	-0.0591217	0.53761	0.251719	0.0863894	-0.112596	0.0503785	0.0769831	0.00856109	-0.152377	0.0815754	0.3237	0.223156	0.0584762	0.175571	-0.0191618	-0.102144	-0.128443	-0.274075	0.486714	0.582176	0.381855	0.853653	0.633628	0.835219	0.381855	0.885328	0.573519	0.747963	0.370681	0.81203	0.847001	0.856524	0.818442	0.895154	-0.265204	-0.302839	-0.155759	-0.308327	0.527693	0.748021	0.483329
		HT7	0.305456	0.143125	-0.036883	0.187011	-0.111326	0.183278	-0.0613828	0.476739	0.336778	0.15766	-0.0358323	0.0276109	0.0865942	-0.0138857	-0.132605	0.0330814	0.176358	0.0716626	-0.0533605	0.114675	0.0274019	-0.0843075	-0.0911501	-0.27586	0.523589	0.688025	0.405419	0.811674	0.654618	0.842819	0.405419	0.800842	0.56477	0.768846	0.444057	0.77889	0.785994	0.864868	0.785172	0.841006	-0.20474	-0.279392	-0.10452	-0.320105	0.375229	0.656096	0.355363
		77G7	-0.0414432	-0.199332	-0.31957	0.0566275	-0.370164	-0.0128758	-0.296721	0.279645	-0.0325552	-0.154821	-0.327477	-0.1557	-0.206598	-0.29001	-0.415723	-0.0877609	-0.0713503	-0.181963	-0.327854	-0.154747	-0.317658	-0.33686	-0.3935	-0.425553	0.195361	0.466969	0.157216	0.830662	0.397264	0.681093	0.157216	0.834104	0.361139	0.740271	0.253197	0.849687	0.731763	0.91201	0.741312	0.91	-0.449806	-0.466169	-0.391148	-0.489761	0.398183	0.67936	0.245166
		TauAB	0.126983	0.00971166	-0.12913	0.246563	-0.222265	0.166788	-0.0977276	0.470634	0.138729	-0.00901047	-0.152986	0.0347937	-0.0400326	-0.125511	-0.203573	0.116976	0.114127	0.00532728	-0.0953362	0.0874717	-0.119925	-0.203781	-0.191122	-0.259453	0.397839	0.594174	0.33911	0.918992	0.588779	0.826238	0.33911	0.923803	0.537507	0.761979	0.332219	0.899864	0.848073	0.942128	0.826748	0.957795	-0.281833	-0.302614	-0.199736	-0.318884	0.527888	0.758741	0.360942
	225-240p3	Tau12	0.0654799	-0.0467817	-0.164564	0.222767	-0.277664	0.154069	-0.138296	0.494614	0.099673	-0.0385462	-0.181059	0.0351786	-0.118996	-0.185861	-0.250665	0.0693993	0.120942	0.0219167	-0.076676	0.0552065	-0.182073	-0.259334	-0.228364	-0.28543	0.342329	0.529044	0.311418	0.908906	0.52192	0.784983	0.311418	0.927199	0.535587	0.81407	0.304754	0.897701	0.858902	0.937668	0.835253	0.956661	-0.317863	-0.326829	-0.225872	-0.345897	0.538013	0.811204	0.457321
		HT7	0.190626	0.0565634	-0.0333855	0.270303	-0.270272	0.0708584	-0.0568602	0.503593	0.243588	0.0849857	-0.0389402	0.0851277	-0.0472196	-0.144929	-0.147992	0.100761	0.0516212	-0.0484334	-0.0826321	0.0909097	-0.0599162	-0.175634	-0.108822	-0.214457	0.44709	0.671459	0.403828	0.888245	0.603926	0.836257	0.403828	0.8674	0.593829	0.851426	0.417811	0.874617	0.836384	0.941314	0.835478	0.911694	-0.187772	-0.234695	-0.101539	-0.279629	0.402739	0.747534	0.377448
		77G7	-0.280874	-0.473544	-0.481751	-0.0491573	-0.454417	-0.167153	-0.454176	0.0936673	-0.262885	-0.348032	-0.481744	-0.264657	-0.428982	-0.505446	-0.547934	-0.153894	-0.216907	-0.324173	-0.587257	-0.266123	-0.529217	-0.611548	-0.558663	-0.479511	-0.0486699	0.272007	-0.091537	0.782931	0.243384	0.573349	-0.0915369	0.797862	0.183035	0.68429	-0.0824612	0.822206	0.666097	0.895639	0.701233	0.88312	-0.549234	-0.535505	-0.522782	-0.568817	0.514326	0.5842	0.0924609
		TauAB	0.0789891	-0.0554812	-0.171981	0.20567	-0.285269	0.087975	-0.149364	0.406745	0.0973595	-0.0410597	-0.187534	-0.00955946	-0.0996806	-0.188623	-0.259965	0.0666384	0.0320407	-0.078001	-0.181387	0.0175898	-0.177007	-0.25136	-0.242814	-0.296974	0.342332	0.575557	0.295747	0.905587	0.540204	0.792977	0.295747	0.903549	0.494715	0.763835	0.316506	0.90045	0.819534	0.952367	0.809768	0.951615	-0.317061	-0.337661	-0.243404	-0.364259	0.484366	0.732743	0.303793
	386-406 p1	Tau12	0.27348	0.280822	0.181289	0.442231	-0.0812211	0.363256	0.183428	0.614358	0.383134	0.304789	0.21525	0.357197	0.134093	0.145944	0.116125	0.255388	0.327839	0.280047	0.358378	0.323426	0.156254	0.0166955	0.146741	0.0041591	0.548318	0.603138	0.550591	0.782234	0.530458	0.683275	0.550591	0.759605	0.636252	0.60724	0.460012	0.744328	0.770724	0.71193	0.767358	0.74881	0.00405671	0.0196283	0.169038	-0.0478792	0.653207	0.79384	0.633007
		HT7	-0.288853	-0.406687	-0.457837	-0.0725853	-0.54975	-0.225641	-0.461206	0.164451	-0.239779	-0.317405	-0.440279	-0.255619	-0.418246	-0.472174	-0.564564	-0.254156	-0.293692	-0.381509	-0.478838	-0.4028	-0.514019	-0.498939	-0.542627	-0.506427	-0.0560496	0.26567	-0.0303073	0.679776	0.113977	0.436109	-0.0303073	0.674011	0.175595	0.679113	0.110235	0.733146	0.566478	0.799453	0.580068	0.779025	-0.548785	-0.535964	-0.499791	-0.573422	0.334608	0.638492	0.257497
		77G7	-0.198518	-0.371147	-0.469257	-0.0634148	-0.376775	0.0134862	-0.383216	0.0817508	-0.227917	-0.2881	-0.48832	-0.249316	-0.318481	-0.368512	-0.547018	-0.156704	-0.0521297	-0.150535	-0.392045	-0.216171	-0.47308	-0.402296	-0.532216	-0.477727	-0.0164354	0.223358	-0.00830742	0.728094	0.219328	0.510885	-0.00830735	0.77942	0.209667	0.599512	0.107404	0.776994	0.639424	0.805848	0.653658	0.840642	-0.567528	-0.543173	-0.543731	-0.539997	0.331373	0.555834	0.106755
		TauAB	-0.0703596	-0.296275	-0.414585	-0.083866	-0.35895	0.0524438	-0.328176	0.036985	-0.122205	-0.177103	-0.431419	-0.260214	-0.24383	-0.290477	-0.518529	-0.171412	0.0202137	-0.0803762	-0.316268	-0.155662	-0.395788	-0.279353	-0.471624	-0.472849	0.0552165	0.294732	0.0586341	0.716688	0.251132	0.534979	0.0586343	0.760664	0.239143	0.646416	0.254771	0.7743	0.632249	0.786316	0.713114	0.834946	-0.536092	-0.531447	-0.51207	-0.530204	0.213914	0.545359	0.0836937
	386-406 p2	Tau12	0.139752	0.00848011	-0.0977856	0.287552	-0.19905	0.201358	-0.0337139	0.379703	0.135518	0.0230727	-0.126557	0.077764	-0.026013	-0.107619	-0.174985	0.184848	0.128321	0.022228	-0.0885546	0.151764	-0.105255	-0.160615	-0.162724	-0.194875	0.38772	0.590492	0.365309	0.933983	0.598911	0.823527	0.365309	0.943945	0.5488	0.702401	0.357282	0.93171	0.859803	0.947255	0.854626	0.968699	-0.242128	-0.248049	-0.181426	-0.265123	0.468201	0.685656	0.208068
		HT7	0.0711373	-0.0786805	-0.174812	0.127206	-0.275505	0.0425918	-0.190663	0.408588	0.127105	-0.0184768	-0.174071	-0.0191274	-0.144747	-0.237225	-0.290885	-0.050069	0.0188447	-0.074025	-0.203994	-0.0467638	-0.190622	-0.264332	-0.251344	-0.329749	0.306975	0.529246	0.276841	0.802115	0.489015	0.739226	0.276841	0.812359	0.502376	0.818895	0.323964	0.809526	0.791477	0.897562	0.770891	0.859993	-0.306897	-0.348533	-0.235854	-0.386862	0.291841	0.664592	0.318913
		77G7	-0.299552	-0.528208	-0.490695	-0.140377	-0.330884	0.0307902	-0.411325	-0.0972307	-0.268419	-0.253027	-0.467097	-0.214511	-0.462088	-0.45849	-0.560497	-0.221008	0.0286217	-0.0350453	-0.415142	-0.158149	-0.546736	-0.549678	-0.541823	-0.445235	-0.186044	-0.0475499	-0.151419	0.577494	0.0646584	0.342313	-0.151419	0.671459	0.113459	0.48619	-0.16724	0.645918	0.565011	0.676025	0.61221	0.688481	-0.544856	-0.492407	-0.517237	-0.53041	0.381361	0.378171	0.0128859
		TauAB	0.0179929	-0.157195	-0.291735	0.0878731	-0.295863	0.115835	-0.230961	0.257264	0.00501242	-0.0985263	-0.306899	-0.114771	-0.149834	-0.218345	-0.380459	-0.0296211	0.0605482	-0.0494809	-0.23654	-0.0432577	-0.274665	-0.271147	-0.355128	-0.389059	0.235195	0.463465	0.20182	0.859853	0.441016	0.710756	0.20182	0.883994	0.39835	0.708058	0.286169	0.878316	0.773659	0.911864	0.794372	0.938335	-0.433673	-0.438941	-0.373818	-0.453993	0.420217	0.670349	0.216231
	386-406 p3	Tau12
		HT7
		77G7
		TauAB
	407-438 p1	Tau12	0.277117	0.274983	0.13254	0.448359	-0.00515632	0.294282	0.135567	0.726427	0.317792	0.129821	0.0924156	0.276862	0.161778	0.0641669	0.0982262	0.32534	0.236239	0.150311	0.15662	0.290238	0.141939	-0.0395578	0.0850172	-0.0167253	0.58758	0.685135	0.511093	0.865891	0.741657	0.886557	0.511093	0.859734	0.695968	0.713136	0.362611	0.797721	0.870066	0.840644	0.771091	0.847758	-0.00861783	-0.0459007	0.0874928	-0.0498793	0.567422	0.754738	0.509775
		HT7	-0.337345	-0.426641	-0.333267	0.159926	-0.644324	-0.285342	-0.307691	0.230123	-0.301786	-0.366491	-0.362096	-0.0845256	-0.505373	-0.575686	-0.43284	0.0402516	-0.346103	-0.434073	-0.422382	-0.212759	-0.512582	-0.553993	-0.43377	-0.269518	-0.074275	0.258183	0.0191373	0.80415	0.18593	0.506715	0.0191374	0.801086	0.269812	0.719436	0.0151819	0.849938	0.645788	0.882009	0.629254	0.861343	-0.395591	-0.350465	-0.389134	-0.369016	0.446505	0.705234	0.206436
		77G7	0.168359	0.0556115	0.0431466	0.369186	-0.172716	0.121586	0.0723526	0.337529	0.221752	0.135597	0.0376416	0.217141	-0.0152484	-0.11425	-0.0678399	0.230729	0.0160177	-0.0672793	-0.118982	0.166435	-0.024646	-0.106735	-0.0466018	-0.0587094	0.408925	0.654897	0.456882	0.878626	0.615144	0.804202	0.456882	0.864055	0.624892	0.672389	0.434407	0.903359	0.857355	0.935168	0.840786	0.887517	-0.0706011	-0.0852727	-0.0324858	-0.141659	0.220121	0.521375	0.000862395
		TauAB	0.126466	0.00866047	-0.166905	0.198663	-0.187869	0.178992	-0.111224	0.376021	0.0941326	-0.0415601	-0.199746	-0.0375574	0.00841011	-0.0732698	-0.215713	0.111473	0.10931	-0.0058771	-0.121323	0.0666231	-0.116876	-0.163799	-0.215655	-0.280185	0.368395	0.560185	0.283145	0.866591	0.552325	0.769667	0.283145	0.866104	0.439492	0.642142	0.306804	0.845398	0.756688	0.86962	0.755796	0.911138	-0.314291	-0.331196	-0.244491	-0.331318	0.536477	0.695852	0.278313
	407-438 p2	Tau12	-0.131876	-0.13694	-0.127392	0.232432	-0.491329	-0.287893	-0.233005	0.609539	-0.0200397	-0.209453	-0.135513	0.0193033	-0.301252	-0.408161	-0.207972	0.0390026	-0.301359	-0.384034	-0.266675	-0.174882	-0.246377	-0.465639	-0.215304	-0.221519	0.198332	0.458736	0.160517	0.725741	0.361253	0.612676	0.160517	0.674496	0.396907	0.807768	0.0685508	0.689687	0.622747	0.81083	0.528327	0.730482	-0.212437	-0.244149	-0.135554	-0.283851	0.557049	0.797597	0.579105
		HT7	-0.360491	-0.268884	-0.118131	0.389192	-0.672158	-0.357992	-0.166382	0.630742	-0.251242	-0.37184	-0.161945	0.14919	-0.488699	-0.56088	-0.191207	0.222878	-0.406519	-0.466347	-0.197779	-0.147849	-0.38229	-0.554905	-0.220195	-0.0453094	0.0127964	0.305811	0.128583	0.7871	0.2133	0.511559	0.128583	0.747128	0.40427	0.823633	-0.0316917	0.783032	0.660741	0.818135	0.557786	0.785563	-0.164164	-0.116979	-0.12662	-0.125325	0.602536	0.897305	0.605265
		77G7	0.259327	0.157189	0.0562131	0.113038	-0.178219	-0.136481	-0.0854539	0.346676	0.364792	0.206364	0.116878	-0.00221307	0.0751061	-0.0226563	-0.0432766	-0.0809369	-0.14347	-0.217434	-0.179918	-0.0783598	0.0956244	-0.0880589	-0.00318818	-0.22201	0.435439	0.643347	0.303947	0.485694	0.440023	0.553305	0.303947	0.386859	0.343642	0.530002	0.367337	0.452412	0.410017	0.585342	0.425541	0.468839	-0.0627945	-0.162275	0.0415449	-0.265421	0.259214	0.440781	0.269849
		TauAB	0.0315578	-0.0642954	-0.159432	0.270438	-0.173409	0.303086	-0.0463012	0.343059	0.0112046	-0.0571413	-0.196448	0.0800572	-0.0828353	-0.109297	-0.191075	0.215073	0.248291	0.158552	0.0120295	0.207349	-0.173924	-0.216683	-0.198026	-0.17468	0.266763	0.367538	0.256455	0.860281	0.468603	0.680935	0.256455	0.911653	0.443252	0.551673	0.173561	0.846553	0.778319	0.818182	0.751687	0.893207	-0.292037	-0.24837	-0.222013	-0.242514	0.663733	0.698767	0.304022
	407-438 p3	Tau12
		HT7
		77G7
		TauAB
SI	175-190 p1	HT7	-0.121933	-0.341321	-0.440734	-0.153981	-0.40406	-0.0159073	-0.459115	0.154947	-0.0495323	-0.125796	-0.37365	-0.277179	-0.34692	-0.349318	-0.53496	-0.332229	0.0431108	-0.0414434	-0.305941	-0.195581	-0.418349	-0.503142	-0.481245	-0.587183	0.0443551	0.172366	-0.0504526	0.623507	0.168833	0.455311	-0.0504525	0.677434	0.144767	0.576498	-0.00369784	0.61121	0.535883	0.722093	0.508373	0.684834	-0.58662	-0.581097	-0.451618	-0.667965	0.664593	0.652949	0.436784
		77G7	-0.20772	-0.400395	-0.456252	-0.0633103	-0.553324	-0.133537	-0.447822	0.176147	-0.162187	-0.235625	-0.424307	-0.259401	-0.419224	-0.457063	-0.577806	-0.245949	-0.140501	-0.237106	-0.400175	-0.276959	-0.499239	-0.513632	-0.529255	-0.542524	0.0019077	0.270336	-0.00335628	0.78165	0.194147	0.550852	-0.00335616	0.816568	0.232743	0.741782	0.104462	0.807594	0.680111	0.890886	0.662631	0.862652	-0.587968	-0.569678	-0.504252	-0.630467	0.502074	0.720068	0.327699
		TauAB	-0.152939	-0.327829	-0.369208	0.0180338	-0.528482	-0.101506	-0.381671	0.27467	-0.0784639	-0.161239	-0.328348	-0.169263	-0.383601	-0.413603	-0.486585	-0.177696	-0.0898096	-0.181542	-0.309818	-0.186453	-0.424838	-0.500602	-0.439405	-0.477624	0.0781924	0.310125	0.0589161	0.798883	0.249281	0.584857	0.0589162	0.825703	0.292489	0.745152	0.104892	0.802823	0.698209	0.890273	0.663704	0.85117	-0.511519	-0.495151	-0.402146	-0.571784	0.617096	0.77306	0.428279
	210-224 p1	HT7	0.0428752	-0.271655	-0.545448	-0.419873	-0.13242	0.197437	-0.50519	-0.0879455	0.0037369	-0.0765564	-0.495212	-0.500436	-0.13713	-0.143736	-0.613499	-0.514359	0.269541	0.172505	-0.307589	-0.19934	-0.345774	-0.290506	-0.543762	-0.747971	0.0725123	0.120948	-0.11773	0.446825	0.188542	0.409189	-0.117729	0.543111	0.012316	0.414666	0.0813562	0.441359	0.408579	0.544906	0.44468	0.567242	-0.703002	-0.738724	-0.594848	-0.777711	0.389798	0.39685	0.215101
		77G7	-0.214859	-0.358391	-0.492737	-0.101593	-0.483051	-0.00587968	-0.451001	0.331388	-0.228814	-0.332192	-0.506843	-0.304534	-0.375074	-0.391211	-0.564139	-0.227309	0.0333058	-0.0596074	-0.218682	-0.225761	-0.491717	-0.466265	-0.528681	-0.548182	-0.0165523	0.146119	-0.0601946	0.715539	0.152945	0.502455	-0.0601946	0.789525	0.195597	0.759243	0.0304727	0.708331	0.638808	0.754505	0.608157	0.815763	-0.629851	-0.604801	-0.541656	-0.592133	0.585418	0.81614	0.574757
		TauAB	-0.297557	-0.48525	-0.53813	-0.285102	-0.51896	-0.100383	-0.532386	0.079226	-0.2526	-0.285313	-0.496124	-0.35654	-0.502445	-0.473015	-0.647691	-0.450153	-0.0120011	-0.0655963	-0.275346	-0.337593	-0.569028	-0.514566	-0.573077	-0.597669	-0.197476	-0.0658889	-0.187511	0.44731	-0.121295	0.209377	-0.187511	0.530216	0.0268871	0.626891	-0.0418385	0.483926	0.412979	0.542831	0.432389	0.560214	-0.645922	-0.613388	-0.557272	-0.648416	0.374733	0.604144	0.473868
	210-224 p2	HT7	-0.0206277	-0.27213	-0.42411	-0.180364	-0.342147	0.00442606	-0.443242	0.136537	0.0198467	-0.082689	-0.366942	-0.322703	-0.250443	-0.281219	-0.522765	-0.345227	0.0564301	-0.0428811	-0.332426	-0.190726	-0.353027	-0.416235	-0.463716	-0.614439	0.126034	0.275366	-0.0071169	0.638497	0.26744	0.538317	-0.00711676	0.681991	0.172346	0.600673	0.0937083	0.623865	0.553289	0.74777	0.544913	0.708641	-0.580102	-0.605912	-0.457154	-0.684006	0.558804	0.606915	0.351631
		77G7	-0.158841	-0.382889	-0.457907	-0.119747	-0.516525	-0.13284	-0.454189	0.102393	-0.121865	-0.194532	-0.41947	-0.299081	-0.380424	-0.426528	-0.591366	-0.303422	-0.139163	-0.237212	-0.432343	-0.298828	-0.474267	-0.463508	-0.530768	-0.57352	0.0176643	0.296243	0.0020088	0.740345	0.202408	0.5462	0.00200896	0.771156	0.218479	0.726961	0.16085	0.776632	0.651688	0.86937	0.65798	0.831302	-0.590737	-0.589955	-0.515089	-0.656068	0.381314	0.640687	0.238474
		TauAB	-0.0174021	-0.261932	-0.399927	-0.150062	-0.389649	-0.0227886	-0.421949	0.167083	0.0308937	-0.068499	-0.344586	-0.290724	-0.260772	-0.297706	-0.525048	-0.343779	0.0140034	-0.0829356	-0.324361	-0.216478	-0.354186	-0.384484	-0.452844	-0.596986	0.139852	0.338008	0.0516516	0.685015	0.276576	0.575049	0.0516517	0.718528	0.243599	0.701821	0.198405	0.690691	0.623005	0.80413	0.63031	0.763964	-0.559594	-0.587054	-0.444912	-0.665719	0.440771	0.63556	0.345303
	210-224 p3	HT7	-0.091373	-0.392315	-0.513544	-0.317657	-0.302037	0.0711197	-0.475197	-0.155026	-0.0775094	-0.0970805	-0.447156	-0.386781	-0.313315	-0.299328	-0.614142	-0.436503	0.135314	0.0572357	-0.342429	-0.194253	-0.440245	-0.403574	-0.538558	-0.640555	-0.0456529	0.053552	-0.124075	0.484074	0.0770387	0.332375	-0.124075	0.573345	0.0256573	0.42672	0.0259607	0.511726	0.425701	0.593443	0.464597	0.583674	-0.646417	-0.638945	-0.551729	-0.711285	0.40375	0.415095	0.157832
		77G7	-0.0616622	-0.343412	-0.399481	-0.219501	-0.411749	-0.0916399	-0.415522	-0.0785661	-0.00382894	-0.0373208	-0.324999	-0.298021	-0.32777	-0.348117	-0.552534	-0.403586	-0.0509479	-0.125961	-0.386096	-0.249421	-0.392714	-0.369965	-0.459424	-0.561602	0.0156241	0.228623	-0.00427663	0.543211	0.129173	0.408037	-0.0042764	0.578908	0.151618	0.589124	0.190967	0.594117	0.496026	0.693273	0.551626	0.629323	-0.527046	-0.543034	-0.446765	-0.642281	0.210772	0.435974	0.117134
		TauAB	-0.0741137	-0.202565	-0.325919	0.00100389	-0.47753	-0.122326	-0.375901	0.484149	-0.0318763	-0.194125	-0.318682	-0.216682	-0.27654	-0.338671	-0.420103	-0.184806	-0.0839618	-0.183738	-0.239402	-0.216707	-0.33057	-0.416683	-0.381501	-0.482754	0.16795	0.382457	0.0767493	0.743895	0.316459	0.631729	0.0767494	0.750497	0.311708	0.83947	0.144953	0.710745	0.655864	0.818544	0.610701	0.800313	-0.472464	-0.501283	-0.363163	-0.532846	0.570411	0.832078	0.607157
	212-224 p1	HT7	-0.212802	-0.404684	-0.523196	-0.214818	-0.457577	-0.063635	-0.538625	0.214771	-0.167535	-0.265631	-0.481222	-0.362054	-0.410351	-0.413381	-0.597218	-0.372077	0.0157271	-0.070431	-0.317064	-0.273721	-0.498457	-0.563558	-0.554233	-0.63495	-0.0428748	0.0743589	-0.150808	0.581092	0.0855137	0.395414	-0.150808	0.647334	0.0690518	0.613095	-0.0999807	0.55914	0.482905	0.667954	0.444729	0.66152	-0.657764	-0.648458	-0.532479	-0.696773	0.694754	0.711926	0.555683
		77G7	-0.233836	-0.382787	-0.502023	-0.098229	-0.511553	-0.0449954	-0.479324	0.314143	-0.213153	-0.312104	-0.49251	-0.294781	-0.403	-0.42111	-0.586116	-0.260481	-0.0228695	-0.116632	-0.283678	-0.268014	-0.510874	-0.515571	-0.54952	-0.575791	-0.0126737	0.178637	-0.0528498	0.743733	0.15616	0.515823	-0.0528498	0.8057	0.203	0.756817	0.0306849	0.741773	0.660049	0.808767	0.61936	0.837317	-0.641768	-0.61621	-0.539971	-0.634221	0.618349	0.816701	0.551375
		TauAB	-0.274967	-0.481342	-0.535341	-0.199915	-0.553286	-0.108834	-0.521879	0.111376	-0.233739	-0.284502	-0.498024	-0.336609	-0.494914	-0.491295	-0.64749	-0.365101	-0.0506568	-0.127991	-0.343506	-0.302709	-0.570939	-0.55487	-0.584972	-0.60022	-0.125771	0.0569686	-0.133279	0.616953	0.0146037	0.366786	-0.133279	0.688546	0.100577	0.680327	-0.0178068	0.644086	0.538184	0.71628	0.538534	0.717189	-0.658419	-0.626982	-0.567014	-0.673619	0.502264	0.685249	0.430111
	225-240 p1	HT7	-0.243705	-0.391692	-0.51832	-0.178288	-0.387546	0.0418104	-0.503139	0.242283	-0.202309	-0.281052	-0.48158	-0.31039	-0.38969	-0.363714	-0.555546	-0.309172	0.113133	0.0374049	-0.222304	-0.204199	-0.488145	-0.56135	-0.532627	-0.587866	-0.0628237	-0.0156318	-0.168523	0.555315	0.0544612	0.341296	-0.168523	0.64331	0.0467057	0.505867	-0.184509	0.519362	0.46427	0.599007	0.397743	0.626019	-0.648126	-0.610186	-0.511253	-0.64467	0.824986	0.718934	0.616695
		77G7	-0.196708	-0.331829	-0.464732	-0.0647144	-0.448233	0.0458573	-0.429157	0.348337	-0.174716	-0.266441	-0.45459	-0.243246	-0.354647	-0.356219	-0.536478	-0.220216	0.0713772	-0.0165106	-0.191342	-0.192861	-0.463067	-0.472978	-0.502109	-0.539899	0.0254486	0.170588	-0.01746	0.741131	0.177696	0.518665	-0.01746	0.813553	0.231838	0.722398	0.0383625	0.729941	0.674713	0.780255	0.626903	0.826576	-0.61245	-0.578958	-0.49711	-0.594397	0.670457	0.826443	0.596967
		TauAB	-0.251484	-0.434724	-0.533155	-0.225937	-0.445437	0.0254695	-0.506278	0.145695	-0.207242	-0.249928	-0.488659	-0.31719	-0.437453	-0.401271	-0.618592	-0.385618	0.0974236	0.032388	-0.225039	-0.249397	-0.530854	-0.51533	-0.559833	-0.605555	-0.111045	-0.0175014	-0.140199	0.54792	-0.0142565	0.308943	-0.140199	0.642715	0.0802718	0.596696	-0.0535298	0.559452	0.503069	0.61608	0.48971	0.647558	-0.664873	-0.623233	-0.546667	-0.662803	0.57899	0.677851	0.532506
	225-240 p2	HT7	-0.109125	-0.284135	-0.470442	-0.217262	-0.320601	0.038134	-0.49966	0.287858	-0.0596409	-0.182273	-0.420334	-0.341417	-0.27923	-0.280497	-0.522501	-0.379343	0.11942	0.0340122	-0.23621	-0.224126	-0.385221	-0.480528	-0.485246	-0.636857	0.0644515	0.124274	-0.101744	0.538689	0.159261	0.423228	-0.101744	0.60089	0.0919528	0.556035	-0.0682941	0.490236	0.464475	0.611186	0.410339	0.608152	-0.619622	-0.63004	-0.467524	-0.680593	0.737908	0.690012	0.619206
		77G7	-0.166708	-0.321876	-0.47798	-0.117581	-0.463684	-0.0354976	-0.479759	0.347937	-0.136458	-0.258582	-0.458041	-0.305741	-0.339197	-0.368418	-0.564825	-0.299893	-0.0118689	-0.109491	-0.285902	-0.279678	-0.453457	-0.47764	-0.524066	-0.604154	0.0571012	0.246907	-0.0194195	0.730502	0.209454	0.553461	-0.0194195	0.779319	0.223385	0.766385	0.0800267	0.718689	0.657317	0.808825	0.615678	0.821249	-0.62834	-0.626207	-0.512744	-0.654996	0.597984	0.802802	0.567131
		TauAB	-0.100548	-0.260373	-0.399865	-0.0814574	-0.431878	-0.0172353	-0.428314	0.385419	-0.0408401	-0.165779	-0.363405	-0.243538	-0.30548	-0.326411	-0.491214	-0.277852	0.0345897	-0.0559245	-0.219411	-0.207089	-0.380497	-0.455072	-0.442654	-0.559935	0.11865	0.271939	0.0258212	0.703766	0.24038	0.556238	0.0258213	0.744529	0.254566	0.750305	0.088141	0.677435	0.636616	0.778484	0.59379	0.770895	-0.558332	-0.565199	-0.420982	-0.616663	0.650059	0.802961	0.619768
	225-240p3	HT7	-0.109216	-0.327584	-0.440734	-0.192572	-0.399681	-0.0464869	-0.481832	0.176439	-0.0316723	-0.124122	-0.370128	-0.306507	-0.337709	-0.345466	-0.536551	-0.381121	0.0271405	-0.0560615	-0.313602	-0.23242	-0.405431	-0.498108	-0.478798	-0.611318	0.0496439	0.173943	-0.0652001	0.57458	0.155105	0.434923	-0.0652	0.620949	0.124451	0.58802	-0.0034199	0.556918	0.493	0.68413	0.468093	0.638109	-0.585724	-0.595488	-0.446743	-0.682919	0.63148	0.64114	0.47222
		77G7	-0.221828	-0.434924	-0.532241	-0.199523	-0.538637	-0.14449	-0.537171	0.133824	-0.181761	-0.264232	-0.491841	-0.365955	-0.431383	-0.464109	-0.655139	-0.391091	-0.126587	-0.220647	-0.434388	-0.36776	-0.535876	-0.523412	-0.595139	-0.645827	-0.045415	0.20401	-0.0792465	0.682628	0.117281	0.475908	-0.0792463	0.727038	0.150126	0.73303	0.0813449	0.711333	0.599546	0.812536	0.596528	0.787685	-0.664231	-0.66042	-0.57558	-0.716266	0.431701	0.676746	0.35827
		TauAB	-0.0835801	-0.282803	-0.374843	-0.0875694	-0.457657	-0.0421308	-0.404562	0.257804	-0.00040057	-0.0861868	-0.314904	-0.212114	-0.329177	-0.34487	-0.506161	-0.311298	-0.00104316	-0.0831328	-0.256886	-0.212987	-0.383569	-0.428076	-0.433056	-0.546106	0.105966	0.299802	0.0671091	0.701169	0.217024	0.539062	0.0671092	0.735572	0.28156	0.753671	0.1786	0.710404	0.653992	0.806804	0.646689	0.771458	-0.531797	-0.536514	-0.404077	-0.619719	0.494972	0.720421	0.472189
	386-406 p1	HT7	0.0716863	-0.224642	-0.40122	-0.357636	-0.2125	0.0433874	-0.440391	-0.0598704	0.122026	0.0552876	-0.309513	-0.375883	-0.169195	-0.179266	-0.527467	-0.542142	0.120859	0.0490403	-0.30639	-0.242162	-0.278232	-0.265135	-0.427762	-0.655433	0.1051	0.21398	-0.0189691	0.386006	0.151213	0.365889	-0.0189689	0.431524	0.0925079	0.488719	0.201892	0.405738	0.383238	0.533457	0.440468	0.479917	-0.548075	-0.602195	-0.431936	-0.699195	0.200074	0.348559	0.201999
		77G7	-0.132326	-0.395288	-0.514849	-0.450793	-0.312871	-0.0301895	-0.515186	-0.19205	-0.10049	-0.10849	-0.438007	-0.434934	-0.328054	-0.308523	-0.64433	-0.617646	0.0359254	-0.01134	-0.344761	-0.376179	-0.446031	-0.322058	-0.542163	-0.662144	-0.138645	-0.0113519	-0.160152	0.265064	-0.107469	0.145721	-0.160152	0.337135	-0.0355506	0.453321	0.116792	0.333176	0.287169	0.413492	0.367261	0.398278	-0.619527	-0.63139	-0.547443	-0.694617	0.0117658	0.276065	0.143924
		TauAB	0.0812146	-0.213517	-0.353271	-0.409768	-0.140435	0.0735602	-0.370785	-0.224288	0.116556	0.106394	-0.261861	-0.350943	-0.143204	-0.128155	-0.485663	-0.563771	0.15753	0.115077	-0.237122	-0.218581	-0.240421	-0.145749	-0.369747	-0.573237	0.0261048	0.099562	-0.0366584	0.19983	0.0217682	0.190443	-0.0366582	0.256159	0.0289355	0.363504	0.236138	0.253634	0.248109	0.340452	0.352051	0.304049	-0.470666	-0.51598	-0.388973	-0.601783	-0.0716945	0.147476	0.0462097
	386-406 p2	HT7	-0.06093	-0.331307	-0.483933	-0.277728	-0.351127	0.0093076	-0.496175	0.0456853	-0.0171601	-0.0934606	-0.414393	-0.374098	-0.294605	-0.305615	-0.59698	-0.45568	0.0717486	-0.016104	-0.344901	-0.253922	-0.408602	-0.419302	-0.520346	-0.672161	0.0485401	0.190431	-0.0578296	0.562273	0.160276	0.443739	-0.0578295	0.621745	0.117371	0.587506	0.0980663	0.571465	0.507924	0.687519	0.524408	0.656357	-0.636	-0.655299	-0.515938	-0.735195	0.445836	0.550427	0.327171
		77G7	-0.139746	-0.410124	-0.520885	-0.340575	-0.388261	-0.0293201	-0.500219	-0.118713	-0.115864	-0.137309	-0.458619	-0.39733	-0.354115	-0.353138	-0.65706	-0.50919	0.0087516	-0.0606884	-0.376636	-0.333013	-0.478121	-0.373103	-0.56456	-0.652833	-0.0855831	0.0978159	-0.0973002	0.474954	0.0135265	0.313059	-0.0973	0.54444	0.0675621	0.566446	0.151424	0.538785	0.459335	0.614088	0.521357	0.601734	-0.644067	-0.644664	-0.571027	-0.707642	0.148483	0.419888	0.155701
		TauAB	-0.0115696	-0.302924	-0.42332	-0.310573	-0.318097	-0.00200199	-0.433981	-0.0831602	0.0270318	-0.0143735	-0.349082	-0.353114	-0.262901	-0.26985	-0.563809	-0.484343	0.0638207	-0.00674603	-0.320719	-0.246829	-0.359352	-0.305587	-0.462442	-0.615421	0.0289545	0.181868	-0.0268924	0.453593	0.106194	0.363167	-0.0268922	0.507268	0.113232	0.554831	0.202292	0.496832	0.440824	0.593459	0.508623	0.556408	-0.55998	-0.588145	-0.469291	-0.671265	0.164707	0.396037	0.169087
	386-406 p3	HT7	0.322438	0.0767311	-0.139169	-0.271214	0.0998234	0.259733	-0.196432	0.046384	0.367687	0.289685	-0.0517821	-0.208721	0.110673	0.127486	-0.209859	-0.395055	0.396287	0.352938	0.0279399	0.0444268	0.0461414	-0.00811716	-0.118552	-0.442625	0.293078	0.206606	0.0931282	0.160573	0.240493	0.294102	0.0931284	0.203454	0.11926	0.265183	0.212864	0.122118	0.208811	0.228683	0.259612	0.198245	-0.285703	-0.366237	-0.14383	-0.450966	0.230328	0.208295	0.295852
		77G7	-0.155318	-0.435257	-0.464842	-0.314255	-0.38371	-0.0722126	-0.440048	-0.284108	-0.112696	-0.0809217	-0.385939	-0.334775	-0.376423	-0.366461	-0.613876	-0.472349	-0.0510788	-0.104183	-0.411293	-0.305067	-0.46451	-0.354945	-0.517838	-0.56267	-0.139494	0.0563512	-0.0975897	0.402218	-0.0469933	0.219709	-0.0975895	0.462532	0.0321744	0.440441	0.141181	0.492432	0.384434	0.555367	0.465445	0.512876	-0.560982	-0.547547	-0.511229	-0.636727	0.0381277	0.266756	-0.0459837
		TauAB	0.186087	0.0361218	-0.0991157	0.16376	-0.278011	-0.0296446	-0.141533	0.40517	0.213386	0.0546536	-0.0897262	-0.0644904	-0.00974724	-0.116179	-0.201379	0.00139953	-0.0641459	-0.174903	-0.216555	-0.0369028	-0.0666039	-0.1668	-0.167094	-0.314059	0.412705	0.668621	0.310065	0.811788	0.591377	0.81522	0.310065	0.772545	0.472041	0.73525	0.388444	0.782222	0.73008	0.887035	0.704101	0.828818	-0.251041	-0.315424	-0.166098	-0.374174	0.388747	0.643651	0.264504
	407-438 p1	HT7	-0.175282	-0.372832	-0.412419	-0.332143	-0.473682	-0.238468	-0.490273	0.0476848	-0.0987324	-0.157119	-0.3476	-0.356496	-0.411491	-0.415974	-0.552906	-0.533457	-0.133129	-0.175555	-0.320611	-0.401963	-0.430106	-0.401349	-0.456484	-0.560282	-0.124096	0.0421429	-0.138048	0.276862	-0.108894	0.161787	-0.138048	0.304343	0.0188967	0.613167	0.0729818	0.318866	0.267779	0.427318	0.321593	0.375103	-0.503429	-0.531243	-0.426715	-0.596433	0.0882155	0.428381	0.366417
		77G7	-0.0722681	-0.274189	-0.342484	-0.0732503	-0.432357	0.0230657	-0.345108	0.230511	-0.00863552	-0.0686355	-0.29592	-0.1748	-0.328786	-0.320423	-0.467636	-0.259343	0.0954902	0.025665	-0.145744	-0.117675	-0.36684	-0.382238	-0.387615	-0.479224	0.0772019	0.216126	0.06351	0.651458	0.173106	0.478514	0.0635101	0.708334	0.273174	0.720573	0.161469	0.663031	0.619556	0.722879	0.6309	0.720564	-0.494975	-0.484254	-0.376518	-0.548843	0.475993	0.701695	0.486532
		TauAB	0.0406532	-0.0590533	-0.213671	-0.011055	-0.30027	0.120648	-0.228335	0.506822	0.0732656	-0.0431403	-0.208447	-0.105533	-0.147668	-0.146868	-0.305397	-0.186206	0.200414	0.141291	0.0887597	-0.0614792	-0.194887	-0.187315	-0.235576	-0.380558	0.205185	0.28589	0.16587	0.580002	0.241079	0.505383	0.16587	0.624886	0.367103	0.792125	0.275433	0.559822	0.613417	0.592832	0.611583	0.648047	-0.370769	-0.387161	-0.249734	-0.391104	0.374066	0.756163	0.708477
	407-438 p2	HT7	-0.130855	-0.381922	-0.418064	-0.570487	-0.199543	-0.156573	-0.454526	-0.460132	-0.104652	-0.0652852	-0.333099	-0.456192	-0.295735	-0.267449	-0.528235	-0.668044	-0.0509187	-0.0561283	-0.362092	-0.396824	-0.355994	-0.221147	-0.426187	-0.526924	-0.282169	-0.224245	-0.297266	-0.17046	-0.329996	-0.209817	-0.297266	-0.1184	-0.278675	0.120531	-0.0157805	-0.0886473	-0.136998	-0.00461858	-0.014323	-0.0565824	-0.445012	-0.475369	-0.42835	-0.538797	-0.307594	-0.13016	-0.117241
		77G7	-0.0550865	-0.25551	-0.382071	-0.179639	-0.381647	-0.0103576	-0.430364	0.217299	0.0449597	-0.0358398	-0.299601	-0.243708	-0.285722	-0.287837	-0.514277	-0.426547	0.0388585	-0.0304863	-0.241705	-0.260582	-0.351816	-0.383443	-0.430194	-0.593863	0.104074	0.263611	0.0486267	0.579871	0.160332	0.456007	0.0486268	0.615201	0.234542	0.68968	0.196208	0.593264	0.572487	0.701814	0.575	0.659273	-0.538744	-0.556244	-0.397023	-0.650986	0.402861	0.629887	0.473836
		TauAB	0.040899	-0.0886956	-0.217578	-0.0177753	-0.302557	0.147271	-0.217138	0.394727	0.0910969	0.015048	-0.190979	-0.07901	-0.165967	-0.151309	-0.334166	-0.213402	0.20838	0.155628	0.0671663	-0.0569597	-0.212762	-0.175329	-0.24865	-0.385117	0.188935	0.289393	0.194123	0.597576	0.220253	0.49355	0.194123	0.648226	0.386854	0.771157	0.334006	0.606171	0.6499	0.627647	0.668966	0.671284	-0.377901	-0.381577	-0.257842	-0.410795	0.296236	0.699915	0.594262
	407-438 p3	HT7	0.23907	0.196818	0.0548066	-0.0808668	0.103291	0.237724	-0.0273849	0.383437	0.306741	0.220322	0.0987306	0.0106333	0.113497	0.165282	0.0398252	-0.181387	0.405128	0.409967	0.3471	0.140711	0.148296	0.0484129	0.0967331	-0.154618	0.250486	0.0602002	0.111463	-0.0104407	0.10522	0.108809	0.111463	0.020272	0.142913	0.241818	0.0918565	-0.0859152	0.0774981	-0.039817	0.0750232	-0.0167415	-0.0469839	-0.0971209	0.0930772	-0.12331	0.29554	0.302875	0.652717
		77G7	-0.0626612	-0.295155	-0.37207	-0.0597756	-0.379863	0.108341	-0.315549	0.0821259	-0.0332092	-0.0562008	-0.331304	-0.174635	-0.294874	-0.286791	-0.494276	-0.211547	0.130385	0.0519004	-0.189965	-0.0749694	-0.380427	-0.341604	-0.420241	-0.474962	0.07188	0.232026	0.0834551	0.720717	0.216535	0.520336	0.0834552	0.793467	0.281643	0.642739	0.203004	0.754829	0.683076	0.786477	0.70632	0.800563	-0.524331	-0.494938	-0.428735	-0.556324	0.430482	0.624359	0.275839
		TauAB	0.0272339	-0.119733	-0.265356	0.0218512	-0.38952	-0.110426	-0.325722	0.414684	0.0755262	-0.0893228	-0.242017	-0.193499	-0.164653	-0.252606	-0.368321	-0.176241	-0.118496	-0.226044	-0.303518	-0.210164	-0.235691	-0.331616	-0.330834	-0.469923	0.267285	0.521368	0.157641	0.761081	0.426224	0.706022	0.157642	0.740355	0.354706	0.779563	0.252913	0.734532	0.675821	0.862558	0.636218	0.807153	-0.414467	-0.466888	-0.31037	-0.524913	0.468423	0.718661	0.421825
			Tau12	HT7	77G7	TauAB	Tau12	HT7	77G7	TauAB	Tau12	HT7	77G7	TauAB	Tau12	HT7	77G7	TauAB	Tau12	HT7	77G7	TauAB	Tau12	HT7	77G7	TauAB	Tau12	HT7	77G7	TauAB	Tau12	HT7	77G7	TauAB	Tau12	HT7	77G7	TauAB	Tau12	HT7	77G7	TauAB	Tau12	HT7	77G7	TauAB	HT7	77G7	TauAB
			6-23				25-44				45-68 0N				68-97 1N				68-87 2N				212-221				243-254				275-286 3R				299-317 4R				354-369				407-438				6-23
			TBS																																												SI
[truncated: 33 more columns]

## Sheet: c) PSP
c)
			TBS																																												SI
			6-23				25-44				45-68 0N				68-97 1N				68-87 2N				212-221				243-254				275-286 3R				299-317 4R				354-369				407-438				6-23
		PSP	Tau12	HT7	77G7	TauAB	Tau12	HT7	77G7	TauAB	Tau12	HT7	77G7	TauAB	Tau12	HT7	77G7	TauAB	Tau12	HT7	77G7	TauAB	Tau12	HT7	77G7	TauAB	Tau12	HT7	77G7	TauAB	Tau12	HT7	77G7	TauAB	Tau12	HT7	77G7	TauAB	Tau12	HT7	77G7	TauAB	Tau12	HT7	77G7	TauAB	HT7	77G7	TauAB
TBS	175-190 p1	Tau12	0.558191	0.453179	0.537571	0.52941	0.46671	0.365723	0.670399	0.189849	0.513614	0.278754	0.376668	0.577165	0.45392	0.293303	0.491157	0.461488	0.270563	0.352195	0.409483	0.382103	0.603914	0.358103	0.535084	0.484633	0.727294	0.573695	0.603188	0.521995	0.507936	0.554373	0.603188	0.537564	0.630513	0.213272	0.625951	0.57378	0.524539	0.393106	0.547327	0.581911	0.506522	0.374355	0.432045	0.51225	0.170088	0.198591	0.247612
		HT7	0.221285	0.071982	0.178917	0.192118	0.176026	0.206756	0.306803	-0.0736996	0.113619	-0.0306587	0.00807726	0.273273	0.13667	0.0696892	0.148474	0.111615	0.0612624	0.0919848	0.109134	0.14017	0.161405	0.087443	0.144246	0.150275	0.307592	0.194007	0.213777	0.199632	0.0896304	0.158897	0.213777	0.213618	0.217	-0.164689	0.25378	0.290167	0.189046	0.0785844	0.120976	0.23395	0.19055	0.0689511	0.114373	0.132337	-0.097804	-0.0921101	0.109507
		77G7	0.347967	0.366778	0.650594	0.666833	0.254269	0.142206	0.768351	0.344858	0.408039	0.171712	0.467343	0.721412	0.241465	0.115603	0.599032	0.630338	0.00334164	0.15512	0.453044	0.418244	0.495609	0.146932	0.638782	0.652228	0.689029	0.498357	0.683372	0.661173	0.460313	0.600556	0.683372	0.705423	0.665354	0.165231	0.604537	0.739607	0.620005	0.503714	0.587348	0.737952	0.62116	0.483881	0.558824	0.687424	0.170928	0.290409	0.239081
		TauAB	0.268293	0.356235	0.701508	0.743806	0.126155	0.0459624	0.729858	0.436543	0.41793	0.231253	0.567285	0.810562	0.153248	0.0838654	0.662248	0.698449	-0.161594	0.0309403	0.42014	0.501999	0.430303	0.0154206	0.683287	0.72674	0.658477	0.533471	0.719704	0.74386	0.474758	0.655303	0.719704	0.770621	0.689689	0.209807	0.581548	0.827473	0.710644	0.624166	0.595896	0.788338	0.709527	0.607687	0.658751	0.736524	0.40313	0.503304	0.467911
	210-224 p1	Tau12	0.270878	0.515576	0.834766	0.82138	0.109903	0.246066	0.833412	0.731572	0.460045	0.411076	0.739066	0.871734	0.213726	0.312128	0.82494	0.777187	0.0330553	0.316069	0.654355	0.693191	0.440651	0.180421	0.824434	0.839628	0.61986	0.613328	0.82086	0.828602	0.502289	0.740421	0.82086	0.860436	0.733661	0.382984	0.743841	0.875479	0.77179	0.763083	0.757858	0.833606	0.804045	0.754572	0.832152	0.776457	0.422408	0.533559	0.429329
		HT7	0.207141	0.241489	0.466899	0.509665	0.114367	0.238767	0.527871	0.375448	0.324845	0.198807	0.365613	0.582496	0.188437	0.182252	0.470262	0.48836	-0.0546356	0.10936	0.38169	0.459754	0.25362	0.00679768	0.439394	0.487781	0.449878	0.392334	0.494173	0.513089	0.202818	0.313722	0.494173	0.524302	0.432567	0.151534	0.446423	0.546675	0.507495	0.402165	0.326063	0.435647	0.555838	0.452855	0.480078	0.344753	0.165927	0.221556	0.202733
		77G7	0.127711	0.307699	0.61095	0.669604	0.0713239	0.0547068	0.659922	0.548728	0.2954	0.176633	0.500034	0.715045	0.0913368	0.107093	0.590711	0.649276	-0.237828	-0.0443537	0.29834	0.353363	0.308776	-0.0121195	0.606223	0.68906	0.474049	0.380784	0.590557	0.664357	0.294149	0.455012	0.590557	0.71573	0.557544	0.245473	0.483013	0.766779	0.59092	0.546058	0.516249	0.724426	0.626132	0.523899	0.612959	0.67954	0.199846	0.326925	0.201262
		TauAB	0.283168	0.405942	0.463777	0.357258	0.0997127	0.36102	0.425515	0.457697	0.416831	0.400186	0.486166	0.339209	0.282575	0.357149	0.484605	0.396786	0.48086	0.659148	0.710424	0.532386	0.353851	0.340794	0.505274	0.383476	0.326921	0.421781	0.50971	0.357548	0.352268	0.45837	0.50971	0.35515	0.390529	0.441955	0.541903	0.256949	0.376931	0.398546	0.56	0.25192	0.403831	0.453872	0.477626	0.255514	0.325783	0.332063	0.118658
	210-224 p2	Tau12	-0.313938	-0.301868	-0.0389462	-0.00155696	-0.330047	-0.215608	-0.107882	-0.0736325	-0.359842	-0.306847	-0.160334	0.0478724	-0.315952	-0.264836	-0.0290064	-0.0691608	-0.288938	-0.256755	-0.0216325	0.146804	-0.363494	-0.352929	-0.133743	-0.0268088	-0.17297	-0.194661	-0.113581	0.0330405	-0.187512	-0.115975	-0.113581	0.0121631	-0.135773	-0.353873	-0.190134	0.0949593	0.018327	0.0150001	-0.255907	-0.0245005	0.0175602	0.00807988	-0.0239598	-0.113253	-0.0899715	-0.0299095	0.276703
		HT7	-0.181311	-0.219438	-0.101851	-0.0785623	-0.218477	0.00669478	-0.11643	-0.117993	-0.237904	-0.198358	-0.202486	-0.010356	-0.179874	-0.0969227	-0.090552	-0.13704	-0.15958	-0.108938	-0.0811246	0.0656175	-0.279444	-0.224334	-0.169357	-0.106659	-0.134511	-0.114624	-0.1295	-0.0439069	-0.205972	-0.173811	-0.1295	-0.0627155	-0.14716	-0.283364	-0.131914	0.0129802	-0.043243	-0.0708251	-0.248861	-0.105444	-0.0387049	-0.0680392	-0.081052	-0.203095	-0.125948	-0.143358	0.144559
		77G7	0.431953	0.538798	0.500847	0.432423	0.208542	0.396998	0.395336	0.457622	0.598981	0.65004	0.640262	0.446637	0.355715	0.497705	0.526757	0.396045	0.404298	0.540189	0.496418	0.507445	0.436932	0.413055	0.568968	0.43966	0.367551	0.582739	0.560473	0.417519	0.431729	0.610987	0.560473	0.39329	0.469117	0.516224	0.617308	0.368745	0.449016	0.517564	0.6626	0.351433	0.468672	0.552078	0.574144	0.345513	0.718156	0.609839	0.461066
		TauAB	-0.228928	-0.137346	0.0486579	0.0875393	-0.312905	-0.156053	-0.137452	0.0680326	-0.21377	-0.166753	-0.0565073	0.0960968	-0.189721	-0.151355	0.0632132	0.0280743	-0.256794	-0.152595	-0.0218244	0.22444	-0.210763	-0.317244	-0.0347603	0.0525862	-0.0518875	-0.0198049	-0.0346699	0.139576	0.0447102	-0.0302231	-0.0346698	0.084018	0.018942	-0.00950966	-0.151596	0.183434	0.158756	0.177526	-0.131424	0.0696979	0.10092	0.126982	0.0783532	-0.00769851	0.162885	0.172344	0.508268
	210-224 p3	Tau12
		HT7
		77G7
		TauAB
	212-224 p1	Tau12	0.180796	0.132532	0.362308	0.389362	0.0734487	0.157938	0.42214	0.164583	0.21867	0.0621418	0.219066	0.464683	0.119685	0.0654965	0.348535	0.348547	-0.0262421	0.0919692	0.311509	0.365565	0.196798	-0.0164915	0.326794	0.355044	0.394213	0.303107	0.395047	0.398811	0.178878	0.279177	0.395047	0.404444	0.353056	0.00492355	0.350871	0.45077	0.400036	0.288488	0.245232	0.354544	0.417247	0.315809	0.338341	0.261694	0.111658	0.152122	0.239948
		HT7	-0.0176565	-0.107329	0.0623943	0.0856443	-0.10089	0.088625	0.109458	-0.0569606	-0.0329634	-0.114687	-0.0595849	0.170569	-0.0609989	-0.0466589	0.0610682	0.0454791	-0.0841083	-0.0130385	0.0850281	0.151674	-0.0856375	-0.140788	0.020147	0.0556744	0.0778063	0.0421282	0.0856406	0.104658	-0.0976776	-0.0130891	0.0856407	0.103551	0.0353931	-0.206934	0.078011	0.163866	0.10842	0.0245424	-0.0498936	0.043918	0.129489	0.0553668	0.0663482	-0.0549884	-0.0573253	-0.0641099	0.111651
		77G7	0.154094	0.180841	0.506093	0.538262	0.0351859	0.0924534	0.552359	0.315219	0.263316	0.0978206	0.361716	0.608648	0.0959069	0.0391912	0.49106	0.517858	-0.0981628	0.0687113	0.438109	0.484718	0.238436	-0.0623496	0.466629	0.514663	0.474846	0.362577	0.528479	0.546471	0.25616	0.395272	0.528479	0.56057	0.463246	0.0697629	0.427864	0.585718	0.536418	0.42601	0.348763	0.493682	0.561832	0.461676	0.482118	0.416202	0.18608	0.279833	0.285089
		TauAB	-0.0926944	-0.136361	-0.0385014	-0.0152884	-0.105283	0.0240001	-0.0697895	-0.0817069	-0.186906	-0.182715	-0.175012	0.0183974	-0.0626013	-0.0687444	-0.0325418	-0.0790058	-0.0848921	-0.049372	-0.00935658	0.144211	-0.157465	-0.161302	-0.121848	-0.0602095	-0.00666303	-0.0399352	-0.0817975	0.0229102	-0.0501059	-0.116958	-0.0817974	-0.0114789	-0.0436146	-0.174021	-0.0994121	0.0582049	0.0395836	-0.00477344	-0.206461	-0.0375492	0.0148742	-0.0216206	-0.0538646	-0.134002	-0.122252	-0.111134	0.21641
	225-240 p1	Tau12	0.562338	0.495516	0.59963	0.603082	0.429238	0.374065	0.624985	0.329839	0.561229	0.375906	0.483172	0.638856	0.478487	0.34857	0.579917	0.511565	0.281687	0.369823	0.480857	0.549442	0.591213	0.337016	0.588718	0.54618	0.714274	0.639297	0.644113	0.598467	0.562388	0.606275	0.644113	0.579821	0.66915	0.33586	0.6501	0.633114	0.626202	0.528726	0.586123	0.589401	0.607556	0.521958	0.54823	0.499073	0.396896	0.399528	0.498495
		HT7	0.258786	0.173753	0.312849	0.330565	0.138517	0.172825	0.322325	0.0599833	0.230885	0.123332	0.197575	0.401986	0.161501	0.117096	0.294685	0.233577	0.0422117	0.109847	0.195301	0.323401	0.223079	0.072636	0.278739	0.278888	0.377523	0.337228	0.338355	0.341999	0.249066	0.333235	0.338355	0.324788	0.343439	0.00393922	0.328656	0.413031	0.356552	0.283194	0.249555	0.337086	0.338829	0.271262	0.284601	0.239847	0.244401	0.221947	0.439069
		77G7	0.400948	0.432428	0.68772	0.710054	0.255906	0.231738	0.714188	0.441617	0.483907	0.311404	0.555002	0.769093	0.303276	0.234487	0.662914	0.634246	0.0562024	0.215429	0.488688	0.569168	0.49398	0.174081	0.669865	0.677457	0.681939	0.594622	0.711907	0.709011	0.502948	0.646764	0.711907	0.716605	0.692665	0.26919	0.650082	0.777389	0.69729	0.611831	0.617234	0.719441	0.698625	0.603504	0.651688	0.635551	0.399709	0.458682	0.494758
		TauAB	0.14884	0.21581	0.510451	0.565281	-0.0367923	-0.0152269	0.413577	0.316753	0.285115	0.199839	0.441143	0.63909	0.0300179	0.0454783	0.497206	0.474792	-0.219485	-0.0688764	0.218582	0.43789	0.214793	-0.0929259	0.486371	0.533308	0.407498	0.414767	0.508944	0.575718	0.335965	0.511839	0.508944	0.561093	0.48951	0.145395	0.386443	0.676888	0.570062	0.544694	0.419191	0.57639	0.553812	0.520477	0.539022	0.498668	0.566534	0.568957	0.699336
	225-240 p2	Tau12	-0.0657355	-0.0823728	0.0983274	0.145514	-0.160384	-0.0209614	0.0228413	0.025281	-0.0405824	-0.0590184	0.0169344	0.206729	-0.088326	-0.0651456	0.108756	0.0832009	-0.194944	-0.118659	0.0357124	0.240354	-0.108536	-0.223585	0.0376485	0.10279	0.0657193	0.0793742	0.0807817	0.17352	0.0016574	0.0390114	0.0807817	0.138477	0.0740433	-0.0967725	0.01428	0.223978	0.195269	0.154746	-0.0585569	0.0925752	0.186203	0.161684	0.131007	-0.00114163	0.168152	0.152473	0.400646
		HT7	-0.168829	-0.194594	-0.0370205	0.00435699	-0.237307	-0.0553014	-0.0965562	-0.0744287	-0.173245	-0.161393	-0.12244	0.0682696	-0.176947	-0.125808	-0.0252879	-0.0488001	-0.225126	-0.162844	-0.0594994	0.127396	-0.236191	-0.278496	-0.102857	-0.0313878	-0.0724571	-0.0536716	-0.0610775	0.0377045	-0.129453	-0.103374	-0.0610775	0.00771496	-0.0718901	-0.207943	-0.111924	0.0897034	0.0525813	0.019538	-0.198259	-0.039853	0.0467092	0.025501	-0.00472876	-0.130757	0.0276121	0.00850622	0.279224
		77G7	0.00664745	-0.0116868	0.163885	0.212322	-0.0962671	0.0383244	0.122714	0.0644531	0.0544913	0.0345701	0.104791	0.294081	-0.0433809	0.00300869	0.171615	0.144261	-0.185558	-0.0998068	0.0588941	0.262234	-0.0433878	-0.165703	0.116197	0.173069	0.131925	0.156464	0.165381	0.231294	0.0220983	0.120047	0.165381	0.207655	0.136057	-0.0887968	0.115517	0.289883	0.245063	0.198897	0.0242645	0.162758	0.253881	0.21741	0.201636	0.069092	0.218882	0.193683	0.392094
		TauAB	-0.0944422	-0.143675	-0.0311581	0.0173808	-0.180162	-0.113132	-0.152968	-0.139932	-0.145991	-0.144505	-0.118557	0.0627956	-0.14204	-0.133073	-0.0342262	-0.0836574	-0.220449	-0.201728	-0.187407	0.0622918	-0.156591	-0.226306	-0.0893784	-0.0330031	-0.0314627	-0.0063736	-0.0687068	0.0510083	0.00341798	-0.0126568	-0.0687068	0.00431678	-0.00728663	-0.143663	-0.125817	0.145293	0.0715451	0.0680941	-0.13013	0.043734	0.0152282	0.0129723	-0.0128905	-0.0435425	0.185601	0.127232	0.504776
	225-240p3	Tau12	0.0879156	-0.0588467	-0.146541	-0.15453	0.0787592	0.0854793	-0.22825	-0.251217	-0.118862	-0.154452	-0.277007	-0.183155	0.127196	-0.00663958	-0.148768	-0.232117	0.183716	0.123235	-0.0536886	0.0674065	-0.00123663	0.0275014	-0.215621	-0.227555	0.0429169	-5.53449e-05	-0.178413	-0.116364	0.123348	-0.122677	-0.178413	-0.188825	-0.0412987	-0.0267223	-0.151661	-0.119075	-0.0490415	-0.0881753	-0.207321	-0.156342	-0.140952	-0.144752	-0.206761	-0.231334	-0.068582	-0.118625	0.299252
		HT7	0.261944	0.104397	-0.107029	-0.116504	0.292509	0.123041	-0.19987	-0.240997	0.0155341	-0.0242733	-0.205107	-0.183153	0.30008	0.0958019	-0.12056	-0.211487	0.284587	0.168918	-0.10048	0.0377166	0.193888	0.195059	-0.161799	-0.200724	0.172933	0.115108	-0.141099	-0.0886761	0.315188	-0.0139624	-0.141099	-0.172077	0.0704091	0.129101	-0.097091	-0.103831	-0.00937744	-0.0357124	-0.108594	-0.073111	-0.135078	-0.12866	-0.198159	-0.118584	0.0276021	-0.0375256	0.374147
		77G7	0.273023	0.227978	0.214372	0.253095	0.112224	0.0738327	0.155486	-0.00565875	0.375471	0.390871	0.334962	0.349085	0.0894943	0.178403	0.201587	0.15293	-0.121687	-0.0953829	-0.134524	0.102553	0.20221	0.0758919	0.252538	0.220856	0.233607	0.371795	0.281052	0.237536	0.201462	0.408719	0.281052	0.218911	0.264167	0.0585944	0.277336	0.319294	0.256815	0.273617	0.290521	0.286537	0.247761	0.264144	0.27208	0.262417	0.666042	0.506485	0.576479
		TauAB	0.0297938	-0.00384177	-0.000221024	0.0272501	-0.00796722	0.0338008	-0.111313	-0.0411823	-0.0427961	-0.0988401	-0.126856	0.00399591	0.0955702	-0.0166376	0.00106043	-0.0142733	-0.0156358	0.0244384	-0.0151669	0.160222	0.0332141	-0.104404	-0.069487	-0.0346412	0.136428	0.0907967	-0.039315	0.071052	0.185138	-0.0601764	-0.039315	0.00539014	0.0890819	0.121758	-0.0971448	0.0712712	0.130055	0.0793815	-0.122971	0.00968573	0.0455163	0.0286215	-0.0318816	-0.0571953	0.0496275	0.0320463	0.354437
	386-406 p1	Tau12	-0.00593518	0.194949	0.377567	0.348872	-0.128829	0.205457	0.214242	0.536186	0.107682	0.19847	0.338437	0.332918	0.0959334	0.216381	0.433719	0.331033	0.153128	0.343823	0.560007	0.654534	0.0333344	0.00526126	0.323508	0.343634	0.141463	0.255595	0.314667	0.382923	0.202552	0.218025	0.314667	0.334684	0.250442	0.326435	0.27291	0.316321	0.406932	0.444864	0.234711	0.188815	0.426605	0.483117	0.448003	0.110593	0.267593	0.317694	0.395269
		HT7	-0.180183	-0.014156	0.234443	0.263721	-0.248524	-8.65066e-05	0.0844869	0.365453	-0.0914406	-0.00965895	0.158207	0.275524	-0.0901552	0.00469364	0.278951	0.229174	-0.152786	0.000540155	0.291801	0.489968	-0.153843	-0.235237	0.147767	0.245105	0.0287857	0.0846851	0.14899	0.303842	0.045416	0.0528851	0.14899	0.259606	0.116878	0.0898876	0.0538417	0.292928	0.314181	0.327019	-0.00306118	0.14213	0.326539	0.347997	0.300361	0.049668	0.150258	0.2195	0.40399
		77G7	-0.0663971	0.0597726	0.197867	0.20638	-0.127972	0.179599	0.160184	0.270296	-0.00774925	0.116543	0.158042	0.27279	-0.0324227	0.157102	0.230497	0.151006	-0.084951	0.0722028	0.193647	0.372614	-0.111657	-0.0822173	0.136266	0.19716	0.0443384	0.142156	0.156144	0.237569	-0.0263719	0.0806287	0.156144	0.221797	0.090997	-0.0212775	0.154819	0.25314	0.225599	0.235066	0.0266051	0.13296	0.265997	0.261498	0.255333	0.0381093	0.0818257	0.0931498	0.248906
		TauAB	-0.118044	-0.165765	-0.111615	-0.090126	-0.129075	0.00183139	-0.178485	-0.126467	-0.219744	-0.188231	-0.222844	-0.068766	-0.0751603	-0.0785169	-0.0994818	-0.153284	-0.0769513	-0.0610088	-0.0644864	0.111351	-0.198439	-0.176404	-0.195324	-0.139234	-0.0719699	-0.077618	-0.15987	-0.0490292	-0.0667734	-0.171261	-0.159869	-0.0976191	-0.106367	-0.163197	-0.175443	-0.028346	-0.0182044	-0.0466585	-0.271007	-0.122709	-0.0543918	-0.0665157	-0.11728	-0.211959	-0.0945529	-0.106491	0.247492
	386-406 p2	Tau12	-0.168348	-0.220064	-0.113306	-0.183866	-0.244929	9.42093e-05	0.0462652	-0.293896	-0.136374	-0.20664	-0.189957	-0.112564	-0.215038	-0.174114	-0.140902	-0.0826362	0.00413662	0.126017	0.154808	-0.0678856	-0.168996	-0.143174	-0.116543	-0.158686	-0.066486	-0.137614	-0.0306033	-0.163093	-0.221095	-0.112797	-0.0306032	-0.115767	-0.165627	-0.338878	-0.0421241	-0.212387	-0.172342	-0.258497	-0.148589	-0.19976	-0.143481	-0.190914	-0.180404	-0.176321	-0.34132	-0.311281	-0.429702
		HT7	0.257164	0.298655	0.277402	0.271582	0.240857	0.0120179	0.115336	0.266564	0.309487	0.166415	0.245897	0.128532	0.394458	0.0799613	0.288119	0.342352	0.258273	0.276808	0.460766	0.457287	0.428066	0.0987072	0.244427	0.219165	0.444867	0.327785	0.258519	0.284165	0.58783	0.224343	0.258519	0.202529	0.388439	0.602839	0.123734	0.105557	0.39446	0.332524	0.192834	0.14371	0.30432	0.339395	0.21291	0.187341	0.28633	0.367841	0.320032
		77G7	-0.200771	-0.15297	0.232742	0.286667	-0.214616	-0.102635	0.254469	0.224534	-0.207433	-0.294772	0.0225565	0.331566	-0.187444	-0.193788	0.237652	0.236767	-0.250234	-0.159096	0.224528	0.279226	-0.153686	-0.268266	0.156075	0.278615	0.0673007	-0.0557015	0.164951	0.303971	-0.0855709	0.0189208	0.164951	0.322432	0.119569	-0.184149	0.0862607	0.404623	0.252952	0.197343	0.0235942	0.266219	0.292817	0.200717	0.23844	0.152005	-0.178561	-0.0343285	0.132493
		TauAB	-0.285552	-0.317751	-0.130416	-0.0496029	-0.297499	-0.350188	-0.116909	-0.0938889	-0.0743076	-0.263114	-0.121117	-0.0446774	-0.240829	-0.398787	-0.127615	0.114878	-0.426304	-0.391923	-0.0394916	-0.0960737	-0.174719	-0.503483	-0.129105	-0.048092	-0.0647407	-0.194954	-0.0739741	-0.054838	-0.207112	-0.274912	-0.0739742	-0.0459534	-0.129379	-0.0690498	-0.267518	-0.122445	-0.0143715	-0.139306	-0.273336	-0.182694	0.0131967	-0.0347766	-0.102912	-0.129116	-0.068849	-0.00130362	-0.263107
	386-406 p3	Tau12
		HT7
		77G7
		TauAB
	407-438 p1	Tau12	0.227345	0.493699	0.817685	0.820941	0.159275	0.2335	0.75126	0.884784	0.390735	0.339664	0.702517	0.789208	0.314741	0.301113	0.844627	0.807092	0.130828	0.357576	0.832755	0.866101	0.422565	0.152483	0.767946	0.823631	0.594611	0.540644	0.747231	0.829363	0.527694	0.58491	0.747231	0.824578	0.700924	0.539359	0.646504	0.790651	0.80799	0.787833	0.637268	0.715044	0.84487	0.811904	0.826649	0.647374	0.298679	0.49191	0.390032
		HT7
		77G7	0.194468	0.488872	0.865893	0.888559	0.0733424	0.126133	0.746016	0.929406	0.469049	0.394491	0.804163	0.859499	0.267058	0.238298	0.896506	0.909326	0.00942315	0.26669	0.855702	0.921551	0.431367	0.0353939	0.827367	0.890215	0.62542	0.589503	0.815769	0.893903	0.57023	0.645503	0.815769	0.879334	0.747593	0.61301	0.641866	0.828633	0.893959	0.867257	0.668135	0.739543	0.929454	0.917625	0.902354	0.698679	0.507208	0.6908	0.500802
		TauAB	0.327243	0.593718	0.863614	0.85441	0.270436	0.265003	0.814835	0.916041	0.498414	0.426093	0.779362	0.801349	0.407306	0.361352	0.884373	0.855765	0.221866	0.427709	0.87092	0.84373	0.549821	0.268551	0.840578	0.865572	0.666022	0.602669	0.80855	0.849235	0.614348	0.663614	0.80855	0.85276	0.769512	0.642392	0.722219	0.793829	0.827268	0.812831	0.747581	0.763474	0.862708	0.834486	0.859766	0.726763	0.337971	0.531877	0.33253
	407-438 p2	Tau12
		HT7
		77G7
		TauAB
	407-438 p3	Tau12
		HT7
		77G7
		TauAB
SI	175-190 p1	HT7	0.0908199	-0.063019	0.10291	0.128098	-0.0691551	0.00182531	0.100597	-0.187814	0.0772074	-0.0694422	-0.000820462	0.216004	-0.0467022	-0.0930854	0.0786552	0.0590782	-0.083622	-0.0464234	0.00889352	0.0966262	0.0311949	-0.107875	0.0890345	0.0840197	0.16562	0.132694	0.15591	0.139242	0.0469521	0.157149	0.15591	0.127944	0.136174	-0.167002	0.12251	0.235075	0.158563	0.0825707	0.0842175	0.140909	0.135924	0.0783977	0.0938546	0.0597103	0.207768	0.142806	0.353455
		77G7	0.170745	0.194819	0.529816	0.586835	-0.0239058	-0.10946	0.417694	0.293132	0.325403	0.130072	0.432055	0.624406	0.0684028	-0.0633572	0.508454	0.54563	-0.193158	-0.0588887	0.331332	0.483583	0.297183	-0.144575	0.503457	0.54195	0.504946	0.424234	0.545498	0.595698	0.43875	0.521495	0.545498	0.569377	0.546445	0.221624	0.35901	0.646843	0.622892	0.548514	0.419832	0.561224	0.582508	0.540958	0.523512	0.510628	0.576487	0.617253	0.687942
		TauAB	0.0131213	0.0461695	0.275472	0.320471	-0.136385	-0.127872	0.120852	0.0904544	0.0509388	0.00232488	0.174157	0.35923	-0.0642967	-0.0873036	0.261378	0.223786	-0.222139	-0.124717	0.0543802	0.301287	0.0515077	-0.182283	0.221504	0.27327	0.225	0.222365	0.238882	0.351933	0.265673	0.300889	0.238882	0.308884	0.287783	0.048104	0.111804	0.439079	0.367501	0.360344	0.164407	0.352641	0.301059	0.298436	0.278316	0.278887	0.427318	0.416971	0.711919
	210-224 p1	HT7	0.199472	0.117943	0.412284	0.427438	0.133481	-0.0507227	0.502361	0.0283079	0.156072	-0.099689	0.180981	0.46582	0.0904893	-0.121638	0.351508	0.385427	-0.0390319	0.0262232	0.311914	0.273288	0.306802	0.00131799	0.369587	0.391931	0.512403	0.265612	0.429347	0.433498	0.343766	0.405237	0.429347	0.457709	0.45006	-0.0612344	0.328418	0.508639	0.413217	0.285683	0.316647	0.50948	0.375985	0.250045	0.284331	0.460004	0.01875	0.142097	0.241928
		77G7	0.276528	0.234218	0.300105	0.263442	0.151688	0.361324	0.404848	0.13271	0.336609	0.215068	0.222496	0.326003	0.250358	0.235963	0.293922	0.286887	0.221657	0.378468	0.431132	0.366244	0.276879	0.150738	0.293674	0.242904	0.402912	0.365427	0.383368	0.274688	0.195459	0.248146	0.383368	0.280501	0.307054	0.11692	0.402888	0.228517	0.303787	0.18803	0.252129	0.181725	0.330346	0.255783	0.263521	0.131454	0.055009	0.0524802	0.000368617
		TauAB	0.180094	0.256501	0.551021	0.581132	0.043764	0.0256406	0.390479	0.458597	0.231072	0.115741	0.396239	0.566994	0.179042	0.0588784	0.553957	0.503217	0.0132139	0.139711	0.479729	0.649427	0.287645	-0.0233718	0.481967	0.528058	0.48002	0.413499	0.495446	0.607279	0.497457	0.466535	0.495446	0.553979	0.542283	0.322933	0.360186	0.629835	0.637432	0.59889	0.392786	0.52965	0.58568	0.566943	0.536506	0.437864	0.434022	0.516202	0.731428
	210-224 p2	HT7	-0.107136	-0.209443	-0.158395	-0.134455	-0.183248	0.0117478	-0.211952	-0.215021	-0.173212	-0.127123	-0.199884	-0.0599243	-0.154093	-0.0692585	-0.144964	-0.220017	-0.110648	-0.113932	-0.173249	0.00871574	-0.259352	-0.174328	-0.202363	-0.174058	-0.167662	-0.0895175	-0.162234	-0.109529	-0.197436	-0.142012	-0.162234	-0.144597	-0.173614	-0.277019	-0.138166	-0.041787	-0.0878375	-0.0952517	-0.230647	-0.163391	-0.0938585	-0.0940147	-0.114034	-0.258678	0.0493971	-0.0437512	0.276532
		77G7	-0.245114	-0.312022	-0.220725	-0.192134	-0.262343	-0.0370405	-0.262274	-0.178405	-0.325737	-0.270746	-0.305617	-0.138841	-0.221706	-0.148159	-0.198041	-0.248461	-0.155572	-0.152495	-0.147315	0.00189173	-0.373728	-0.267403	-0.28998	-0.223193	-0.258873	-0.223469	-0.257569	-0.158707	-0.296739	-0.299623	-0.257569	-0.189076	-0.267995	-0.321487	-0.250333	-0.110218	-0.146794	-0.163049	-0.36389	-0.244011	-0.141898	-0.153291	-0.181765	-0.343165	-0.168748	-0.19912	0.116283
		TauAB	-0.0436823	-0.155458	-0.115379	-0.0824716	-0.121411	-0.0558539	-0.215873	-0.245241	-0.142559	-0.130862	-0.181604	-0.0343217	-0.104217	-0.097481	-0.117099	-0.192335	-0.116525	-0.144509	-0.218166	0.00637435	-0.160244	-0.151526	-0.164992	-0.138391	-0.0733872	-0.0312832	-0.135149	-0.0543814	-0.0378034	-0.0535057	-0.135149	-0.104939	-0.0767565	-0.196324	-0.143138	0.0293751	-0.0229983	-0.0262182	-0.173774	-0.0627143	-0.0763943	-0.0719546	-0.101329	-0.150094	0.150867	0.0584795	0.453205
	210-224 p3	HT7	0.265196	0.0675328	-0.188167	-0.26334	0.236029	0.335371	-0.20858	-0.313112	0.00782335	-0.00468713	-0.278072	-0.293584	0.292853	0.198871	-0.189985	-0.331739	0.510158	0.440626	0.0363795	0.0370723	0.11676	0.296662	-0.220894	-0.327598	0.0651641	0.0766644	-0.17202	-0.231667	0.148229	-0.0929637	-0.172019	-0.298438	-0.0602269	0.0302764	-0.0319148	-0.277735	-0.152165	-0.182818	-0.124933	-0.268742	-0.235704	-0.223876	-0.266549	-0.328962	-0.11911	-0.231598	0.125979
		77G7	0.276008	0.0338768	-0.196763	-0.207585	0.385262	0.0520696	-0.255883	-0.27855	-0.0207443	-0.126425	-0.278502	-0.325293	0.335826	0.0139906	-0.20418	-0.271271	0.414574	0.166021	-0.0529136	-0.0626036	0.205912	0.25858	-0.22771	-0.282979	0.0941088	-0.0297518	-0.226347	-0.210002	0.240926	-0.115891	-0.226347	-0.283373	-0.0208832	0.112714	-0.155673	-0.253893	-0.128243	-0.162054	-0.139389	-0.198764	-0.231163	-0.225256	-0.294261	-0.216231	-0.121882	-0.143101	0.145788
		TauAB	0.206433	0.0658837	-0.192169	-0.234945	0.256312	0.000432302	-0.289931	-0.331219	-0.0662268	-0.104241	-0.271246	-0.343217	0.227853	0.0076359	-0.222573	-0.304774	0.338052	0.179596	-0.17654	-0.16093	0.184361	0.246139	-0.212212	-0.289799	0.0616298	-0.00716653	-0.231553	-0.215409	0.309976	-0.0284816	-0.231554	-0.27962	-0.00522493	0.134402	-0.182292	-0.22735	-0.157612	-0.134552	-0.0790796	-0.116124	-0.306292	-0.266381	-0.309288	-0.101801	-0.0324626	-0.088965	0.238633
	212-224 p1	HT7	0.0652128	-0.116623	-0.146511	-0.172864	-0.0552807	0.153835	-0.141364	-0.337423	-0.0521718	-0.0756329	-0.211908	-0.0985007	-0.0238633	0.0158513	-0.153541	-0.248981	0.12716	0.123477	-0.0865725	-0.0266035	-0.0982223	0.0135018	-0.162206	-0.2142	-0.0521905	0.00241876	-0.0990607	-0.150387	-0.0979053	-0.0560457	-0.0990606	-0.177065	-0.110027	-0.239174	-0.0205766	-0.0967332	-0.11675	-0.150417	-0.114289	-0.170677	-0.141718	-0.155617	-0.153074	-0.252897	0.0197309	-0.109403	0.184649
		77G7	-0.130811	-0.288742	-0.265166	-0.24617	-0.104498	-0.101269	-0.345664	-0.322744	-0.336692	-0.357299	-0.404601	-0.26076	-0.0920093	-0.207555	-0.259394	-0.31978	0.00327315	-0.0975503	-0.143268	-0.0205553	-0.240567	-0.172395	-0.34995	-0.30939	-0.165593	-0.225746	-0.320069	-0.211876	-0.106202	-0.284432	-0.320069	-0.272816	-0.222686	-0.249447	-0.321911	-0.18778	-0.165411	-0.197956	-0.383438	-0.266015	-0.228228	-0.234169	-0.298055	-0.350404	-0.195866	-0.20764	0.219457
		TauAB	0.205158	0.0562509	-0.186976	-0.319914	0.0957934	0.395383	-0.093124	-0.266283	0.100321	0.114225	-0.148064	-0.295555	0.143567	0.246779	-0.188212	-0.307091	0.565002	0.558776	0.10859	-0.139052	0.0565688	0.375722	-0.116542	-0.302086	-0.106033	0.0151105	-0.0833286	-0.32184	-0.10064	-0.0424414	-0.0833285	-0.31094	-0.164297	-0.0453695	0.12315	-0.364588	-0.298635	-0.283716	0.0672899	-0.325643	-0.287734	-0.254385	-0.20464	-0.321181	-0.118659	-0.271155	-0.306297
	225-240 p1	HT7	-0.0698276	-0.170529	-0.0665066	-0.0421369	-0.203394	-0.0421717	-0.1435	-0.213816	-0.105326	-0.0945153	-0.107762	0.0426141	-0.175383	-0.0963305	-0.0660915	-0.141569	-0.14185	-0.129769	-0.161335	0.0226696	-0.195589	-0.172304	-0.0937581	-0.0795982	-0.101147	-0.0200521	-0.0582186	-0.0212439	-0.114474	0.00144895	-0.0582186	-0.0515082	-0.0757263	-0.248508	-0.0609387	0.0783595	-0.00597728	-0.00401488	-0.0955611	-0.0369524	-0.0252806	-0.0206484	-0.0229721	-0.125786	0.20997	0.103783	0.414423
		77G7	-0.0876826	-0.1813	-0.0601701	-0.0231839	-0.184385	-0.0586754	-0.188389	-0.115279	-0.139048	-0.130506	-0.114393	0.0203747	-0.126647	-0.106576	-0.0397466	-0.119645	-0.0968378	-0.117872	-0.0692854	0.131539	-0.205122	-0.192305	-0.10972	-0.0726001	-0.110498	-0.0475157	-0.0852409	-0.00139673	-0.0880057	-0.0580108	-0.0852409	-0.0553549	-0.0783104	-0.164508	-0.1039	0.0638544	0.0336996	0.034477	-0.14254	-0.0789055	0.0131595	0.0300251	-0.0051153	-0.181112	0.189086	0.120043	0.459457
		TauAB	-0.180693	-0.24156	-0.128437	-0.0920419	-0.300965	-0.19259	-0.262069	-0.259996	-0.221269	-0.171126	-0.162516	-0.0221976	-0.28793	-0.197142	-0.132835	-0.203819	-0.266085	-0.268869	-0.305494	-0.0694042	-0.284494	-0.262824	-0.16189	-0.125442	-0.201219	-0.1091	-0.152887	-0.064995	-0.129675	-0.0339463	-0.152887	-0.100694	-0.135568	-0.276943	-0.190729	0.0588493	-0.059696	-0.0182492	-0.158838	-0.0405596	-0.105216	-0.0740026	-0.0813351	-0.113823	0.244544	0.139666	0.503773
	225-240 p2	HT7	-0.173405	-0.241973	-0.156236	-0.12513	-0.240606	-0.0778319	-0.23786	-0.218217	-0.241654	-0.194912	-0.225655	-0.0635627	-0.208008	-0.141742	-0.149097	-0.210016	-0.189363	-0.17958	-0.204505	0.00208949	-0.288657	-0.244654	-0.215547	-0.165612	-0.173988	-0.121347	-0.184126	-0.0908909	-0.167087	-0.149347	-0.184126	-0.129475	-0.167659	-0.276475	-0.199839	-0.0161439	-0.0737871	-0.0752763	-0.260516	-0.128692	-0.101391	-0.0987769	-0.126214	-0.218179	0.0371036	-0.0303115	0.328442
		77G7	-0.178116	-0.285327	-0.221833	-0.190904	-0.211545	-0.0782598	-0.307236	-0.251769	-0.297011	-0.265816	-0.311189	-0.153024	-0.181893	-0.165215	-0.208853	-0.275569	-0.124429	-0.16143	-0.199859	-0.0163375	-0.308996	-0.232467	-0.289618	-0.238976	-0.213781	-0.186178	-0.261042	-0.15754	-0.192675	-0.236907	-0.261042	-0.205445	-0.223164	-0.283682	-0.261987	-0.0953694	-0.130038	-0.138709	-0.330695	-0.212601	-0.162103	-0.160574	-0.199142	-0.309369	-0.0563243	-0.112256	0.280416
		TauAB	-0.113546	-0.20264	-0.156325	-0.130156	-0.186841	-0.115538	-0.275674	-0.282803	-0.229496	-0.206357	-0.244392	-0.0940675	-0.164658	-0.155259	-0.163229	-0.237715	-0.145069	-0.165532	-0.261891	-0.0429851	-0.21114	-0.191074	-0.212459	-0.181166	-0.127242	-0.0928277	-0.193828	-0.0931907	-0.0473674	-0.0925035	-0.193828	-0.14383	-0.116991	-0.214647	-0.21586	-0.00220935	-0.068596	-0.0567914	-0.214867	-0.0810368	-0.140375	-0.126803	-0.154253	-0.161164	0.102908	0.0204306	0.449459
	225-240p3	HT7	-0.0701285	-0.166064	-0.155875	-0.136403	-0.101475	-0.00756566	-0.242094	-0.222799	-0.206839	-0.184495	-0.257402	-0.114322	-0.0643409	-0.0808518	-0.151177	-0.225731	-0.0449671	-0.0667061	-0.156295	0.0356116	-0.1773	-0.136187	-0.226852	-0.193588	-0.0856062	-0.0743332	-0.195049	-0.0981499	-0.044667	-0.151303	-0.195049	-0.154062	-0.117364	-0.173687	-0.192659	-0.0526767	-0.0606544	-0.0764477	-0.257252	-0.137123	-0.117534	-0.119148	-0.163913	-0.226724	-0.0207886	-0.077232	0.332837
		77G7	-0.0323419	-0.134984	-0.166978	-0.157981	-0.0462309	0.0384836	-0.258864	-0.209149	-0.192726	-0.168063	-0.269433	-0.157318	0.00285091	-0.0402048	-0.157	-0.241606	0.0451732	0.00884782	-0.108044	0.0662972	-0.14211	-0.0816223	-0.241839	-0.220081	-0.069733	-0.0634683	-0.210513	-0.118753	-0.00852054	-0.170391	-0.210513	-0.184392	-0.116626	-0.118413	-0.193394	-0.101447	-0.0684673	-0.0862319	-0.267078	-0.177069	-0.131194	-0.126096	-0.183938	-0.264485	-0.0522473	-0.104442	0.309568
		TauAB	0.148598	8.10191e-05	-0.14933	-0.164562	0.120326	0.0609853	-0.251841	-0.324438	-0.0829699	-0.106311	-0.261949	-0.195011	0.13747	0.0137355	-0.169798	-0.272989	0.186386	0.10963	-0.186702	-0.0406998	0.0645245	0.0996889	-0.19807	-0.236402	0.0619899	0.042107	-0.179151	-0.127865	0.208015	-0.0317462	-0.179151	-0.199058	-0.00161651	0.00273916	-0.141489	-0.0918656	-0.0692502	-0.0744728	-0.128408	-0.083717	-0.195015	-0.182559	-0.223857	-0.140747	0.0446048	-0.0489915	0.409074
	386-406 p1	HT7	-0.140204	-0.237706	-0.16152	-0.156472	-0.20575	0.00255102	-0.190697	-0.239987	-0.221584	-0.192965	-0.240694	-0.0913842	-0.168368	-0.109163	-0.153248	-0.218102	-0.0726513	-0.0584686	-0.0892985	0.0323309	-0.270129	-0.184523	-0.217382	-0.19246	-0.158102	-0.122614	-0.167329	-0.124809	-0.195616	-0.164838	-0.167329	-0.154409	-0.185821	-0.307057	-0.153015	-0.0822266	-0.104155	-0.128568	-0.259115	-0.188944	-0.113254	-0.122016	-0.14758	-0.27649	-0.0682396	-0.123513	0.181597
		77G7	-0.219831	-0.253026	-0.121662	-0.0943634	-0.279429	-0.091315	-0.20982	-0.14504	-0.262185	-0.211221	-0.199383	-0.0437059	-0.220686	-0.159127	-0.105869	-0.155963	-0.188614	-0.155464	-0.0945917	0.0908239	-0.311209	-0.282629	-0.193514	-0.130708	-0.172488	-0.132886	-0.160145	-0.0568091	-0.169377	-0.161108	-0.160145	-0.0968363	-0.162946	-0.25488	-0.197979	-0.013746	-0.0371488	-0.0447022	-0.272414	-0.136717	-0.0537699	-0.0476123	-0.0898612	-0.223916	8.79776e-05	-0.0284639	0.292591
		TauAB	-0.00132918	-0.138147	-0.247711	-0.346791	-0.141841	0.227022	-0.201164	-0.365328	-0.0985603	-0.0514459	-0.251041	-0.278357	-0.090653	0.0684434	-0.249766	-0.369638	0.299633	0.323743	-0.031787	-0.150554	-0.17476	0.121339	-0.216927	-0.339646	-0.235248	-0.102515	-0.173489	-0.328928	-0.234653	-0.118104	-0.173489	-0.325862	-0.263509	-0.259711	-0.0252297	-0.314025	-0.31685	-0.297034	-0.0927422	-0.338888	-0.313333	-0.282255	-0.243844	-0.372969	-0.100648	-0.253402	-0.125391
	386-406 p2	HT7	-0.200626	-0.252156	-0.136432	-0.109064	-0.289306	-0.0890019	-0.231928	-0.185507	-0.241835	-0.182657	-0.191206	-0.0421584	-0.242456	-0.147074	-0.123752	-0.190982	-0.195813	-0.173032	-0.167842	0.0321403	-0.316696	-0.262358	-0.190726	-0.142843	-0.202547	-0.125777	-0.163005	-0.0762513	-0.190003	-0.130818	-0.163005	-0.113201	-0.173287	-0.277981	-0.182879	-0.00235958	-0.0620555	-0.0514776	-0.235808	-0.127958	-0.078999	-0.0642879	-0.0888897	-0.217681	0.0806515	0.0114428	0.346201
		77G7	-0.289965	-0.372039	-0.20062	-0.173501	-0.314669	-0.160341	-0.292879	-0.196071	-0.395072	-0.38112	-0.325322	-0.150043	-0.265967	-0.267172	-0.180001	-0.233668	-0.141527	-0.169689	-0.0711219	0.0526674	-0.390671	-0.317147	-0.282584	-0.210988	-0.26804	-0.276401	-0.259549	-0.138748	-0.249527	-0.277767	-0.259549	-0.180627	-0.255533	-0.324286	-0.292497	-0.0924331	-0.120017	-0.132222	-0.355854	-0.231011	-0.135781	-0.133693	-0.176268	-0.330076	-0.150186	-0.142498	0.214065
		TauAB	-0.158559	-0.260223	-0.112113	-0.0848241	-0.281167	-0.213861	-0.239148	-0.305082	-0.230307	-0.222283	-0.174534	-0.0246919	-0.277578	-0.238587	-0.120588	-0.198967	-0.198974	-0.230325	-0.229582	-0.0438295	-0.26208	-0.239597	-0.14695	-0.12206	-0.179957	-0.12479	-0.134088	-0.0620982	-0.109613	-0.00938026	-0.134088	-0.0974271	-0.121101	-0.303101	-0.171241	0.0595389	-0.0541564	-0.0239798	-0.132627	-0.0383127	-0.102156	-0.0762208	-0.0826977	-0.114766	0.216206	0.131345	0.501567
	386-406 p3	HT7	0.0255838	-0.00875154	0.0999113	0.159139	-0.1181	-0.0541288	0.0275965	-0.0458012	0.120048	0.157878	0.168557	0.271049	-0.126614	0.000728898	0.100329	0.0614608	-0.286716	-0.251787	-0.184402	0.0761609	-0.0663089	-0.150385	0.102947	0.131348	0.0295547	0.156579	0.131519	0.157039	-0.0248589	0.205374	0.131519	0.140492	0.08365	-0.140974	0.0978705	0.262333	0.161186	0.176276	0.0805844	0.162823	0.171986	0.180873	0.183098	0.10488	0.489916	0.369419	0.518933
		77G7	-0.275659	-0.26709	-0.103838	-0.0684927	-0.309794	-0.0818475	-0.156481	-0.07313	-0.292168	-0.233282	-0.194639	-0.00935818	-0.251855	-0.160656	-0.0853458	-0.111896	-0.253323	-0.186878	-0.0811445	0.0914875	-0.346759	-0.323684	-0.18099	-0.0923726	-0.183437	-0.158183	-0.14977	-0.029724	-0.228093	-0.204039	-0.14977	-0.0535556	-0.17178	-0.273473	-0.193856	0.0160148	-0.0285927	-0.0451588	-0.291815	-0.114514	-0.0233897	-0.0375163	-0.0670663	-0.204189	-0.100747	-0.0965641	0.175908
		TauAB	-0.324409	-0.281975	-0.205622	-0.187383	-0.344473	-0.404998	-0.359737	-0.200412	-0.384846	-0.391722	-0.289421	-0.236525	-0.334453	-0.365674	-0.229713	-0.212291	-0.261521	-0.287057	-0.358532	-0.308001	-0.251188	-0.275551	-0.216879	-0.17833	-0.281847	-0.303789	-0.283355	-0.159355	-0.05939	-0.167986	-0.283355	-0.171662	-0.175419	-0.0810003	-0.380413	-0.0589617	-0.183058	-0.106369	-0.163544	-0.0422232	-0.279919	-0.234416	-0.217701	-0.0253957	-0.0160327	-0.0166349	0.194816
	407-438 p1	HT7	-0.4874	-0.38344	-0.168921	-0.129696	-0.549102	-0.363916	-0.312878	-0.12737	-0.480351	-0.418964	-0.28409	-0.103838	-0.484113	-0.376666	-0.174233	-0.164626	-0.461638	-0.368734	-0.30911	-0.140227	-0.455873	-0.48194	-0.228179	-0.124485	-0.335767	-0.311302	-0.257161	-0.0774721	-0.223771	-0.230501	-0.25716	-0.0894904	-0.224802	-0.249236	-0.381095	0.036232	-0.111303	-0.058136	-0.287408	-0.0479212	-0.165465	-0.142778	-0.137946	-0.0927454	-0.0531176	-0.042788	0.252495
		77G7	0.285778	0.131675	-0.115045	-0.236853	0.133712	0.40654	-0.0335643	-0.253419	0.220947	0.23679	-0.0325013	-0.187627	0.168854	0.297462	-0.121014	-0.246877	0.526101	0.525685	0.0718813	-0.121744	0.12705	0.405161	-0.0269029	-0.22323	-0.0365047	0.122888	0.00967955	-0.246983	-0.0397703	0.0875354	0.00967961	-0.236537	-0.0802889	-0.0157758	0.213184	-0.266486	-0.222463	-0.199233	0.172384	-0.228913	-0.210728	-0.171775	-0.114951	-0.223027	0.0786947	-0.115225	-0.162715
		TauAB	-0.338885	-0.287555	-0.136754	-0.104847	-0.418328	-0.439623	-0.321966	-0.227529	-0.372441	-0.35428	-0.223747	-0.109067	-0.403878	-0.383889	-0.165378	-0.17066	-0.381348	-0.36585	-0.382666	-0.222587	-0.287679	-0.353976	-0.165479	-0.109316	-0.244485	-0.233678	-0.214065	-0.067404	-0.0351795	-0.0602233	-0.214065	-0.0881815	-0.121784	-0.160784	-0.340518	0.0673639	-0.091686	-0.0120117	-0.139687	0.0504728	-0.194487	-0.146583	-0.136743	0.0413253	0.148842	0.123723	0.432158
	407-438 p2	HT7
		77G7
		TauAB	-0.162966	-0.241041	-0.232368	-0.199413	-0.163757	-0.385253	-0.403047	-0.296886	-0.298256	-0.350056	-0.299752	-0.265132	-0.198561	-0.336047	-0.256724	-0.265656	-0.147464	-0.287165	-0.392529	-0.309108	-0.144569	-0.17167	-0.240438	-0.222905	-0.213766	-0.255629	-0.298582	-0.187466	0.0228331	-0.130842	-0.298582	-0.224794	-0.143638	-0.063395	-0.365706	-0.0868155	-0.179252	-0.117748	-0.15445	-0.0682656	-0.292887	-0.246941	-0.253457	-0.0631235	0.0808068	0.0458293	0.330902
	407-438 p3	HT7
		77G7
		TauAB
			Tau12	HT7	77G7	TauAB	Tau12	HT7	77G7	TauAB	Tau12	HT7	77G7	TauAB	Tau12	HT7	77G7	TauAB	Tau12	HT7	77G7	TauAB	Tau12	HT7	77G7	TauAB	Tau12	HT7	77G7	TauAB	Tau12	HT7	77G7	TauAB	Tau12	HT7	77G7	TauAB	Tau12	HT7	77G7	TauAB	Tau12	HT7	77G7	TauAB	HT7	77G7	TauAB
			6-23				25-44				45-68 0N				68-97 1N				68-87 2N				212-221				243-254				275-286 3R				299-317 4R				354-369				407-438				6-23
			TBS																																												SI
[truncated: 33 more columns]

## Sheet: d) CBD
d)
			TBS																																												SI
			6-23				25-44				45-68 0N				68-97 1N				68-87 2N				212-221				243-254				275-286 3R				299-317 4R				354-369				407-438				6-23
		CBD	Tau12	HT7	77G7	TauAB	Tau12	HT7	77G7	TauAB	Tau12	HT7	77G7	TauAB	Tau12	HT7	77G7	TauAB	Tau12	HT7	77G7	TauAB	Tau12	HT7	77G7	TauAB	Tau12	HT7	77G7	TauAB	Tau12	HT7	77G7	TauAB	Tau12	HT7	77G7	TauAB	Tau12	HT7	77G7	TauAB	Tau12	HT7	77G7	TauAB	HT7	77G7	TauAB
TBS	175-190 p1	Tau12	0.855976	0.843379	0.745172	0.576209	0.793189	0.830043	0.727749	0.529057	0.856716	0.827407	0.704917	0.623456	0.737332	0.758947	0.658262	0.370154	0.776262	0.695965	0.382237	0.557715	0.852095	0.804358	0.746293	0.524637	0.896866	0.877008	0.766363	0.755455	0.772065	0.708112	0.766363	0.465929	0.85566	0.666932	0.742985	0.548607	0.876827	0.879714	0.798054	0.756807	0.615927	0.60902	0.703162	0.609516	0.832694	0.707415	0.232398
		HT7	0.83578	0.795152	0.648956	0.456391	0.779084	0.761805	0.647232	0.419799	0.792211	0.756446	0.59313	0.490873	0.677827	0.721401	0.557511	0.261174	0.76691	0.662203	0.278141	0.53203	0.786961	0.794487	0.653552	0.41579	0.826332	0.822119	0.667352	0.652473	0.694721	0.634998	0.667352	0.347838	0.766404	0.515261	0.655794	0.476452	0.787023	0.807269	0.704919	0.655424	0.53605	0.519247	0.602263	0.487065	0.760108	0.638078	0.166431
		77G7	0.72611	0.819967	0.797366	0.669495	0.645784	0.815839	0.731506	0.636682	0.76477	0.831849	0.76257	0.735014	0.583845	0.693292	0.689956	0.477103	0.638181	0.601792	0.463035	0.571056	0.758759	0.740838	0.791255	0.658488	0.835878	0.865743	0.780346	0.806721	0.724932	0.729163	0.780346	0.594491	0.793561	0.627945	0.74809	0.550726	0.839095	0.869212	0.763147	0.814206	0.697057	0.704396	0.755825	0.685878	0.747395	0.636431	0.155345
		TauAB	0.493007	0.479284	0.480981	0.624636	0.374553	0.520493	0.366312	0.578566	0.478246	0.48979	0.444659	0.719276	0.336657	0.338239	0.365177	0.422179	0.390656	0.265924	0.450897	0.205529	0.474754	0.404641	0.463832	0.531002	0.567143	0.554633	0.459515	0.8615	0.457906	0.429472	0.459515	0.504595	0.622874	0.535178	0.430059	0.821634	0.68583	0.682099	0.464812	0.874044	0.414206	0.41501	0.480449	0.528709	0.736921	0.726813	0.504792
	210-224 p1	Tau12	0.0477853	0.195767	0.215902	-0.0401029	0.183178	0.200438	0.136746	0.12315	0.240455	0.392709	0.353594	0.163311	0.092813	0.20979	0.176396	-0.162212	0.0795019	0.164439	0.0171369	0.134728	0.147257	0.179866	0.274096	-0.00630502	0.161336	0.176935	0.314717	0.261506	-0.0945544	-0.0469057	0.314717	-0.0358398	0.0818837	0.63811	0.524924	0.476323	0.0641321	0.258458	0.275552	0.245241	-0.0352546	0.00475806	0.327516	-0.0194113	0.179873	-0.092595	-0.105474
		HT7	0.782824	0.881311	0.835581	0.698769	0.721926	0.889966	0.768501	0.668219	0.838843	0.895947	0.822368	0.774449	0.668045	0.773958	0.738257	0.509096	0.694303	0.695626	0.418776	0.576685	0.82724	0.8056	0.83351	0.675544	0.874621	0.90781	0.835597	0.851476	0.752232	0.768118	0.835597	0.623929	0.833545	0.762734	0.791177	0.599727	0.870247	0.926236	0.835171	0.858348	0.709976	0.723889	0.815929	0.72689	0.798593	0.644417	0.176854
		77G7	0.0836326	0.0527642	-0.23471	-0.419166	0.13333	0.0637672	-0.236534	-0.35388	-0.0170852	-0.00409835	-0.181043	-0.313229	-0.0300489	0.0576015	-0.304275	-0.453133	0.0355135	0.0706764	-0.801995	-0.293082	-0.0320479	0.111361	-0.219814	-0.396106	-0.138872	-0.0540386	-0.211523	-0.225551	-0.260355	-0.186844	-0.211523	-0.400531	-0.26717	-0.0901499	-0.204037	-0.0817553	-0.268183	-0.0376649	-0.153201	-0.173021	-0.344608	-0.299773	-0.206689	-0.33031	-0.17026	-0.39819	-0.354037
		TauAB	-0.0613223	-0.141056	-0.0575315	0.396578	-0.110742	-0.0738861	-0.117837	0.344316	-0.0971568	-0.178072	-0.09791	0.34525	-0.0464032	-0.112467	-0.0201064	0.45995	-0.0465361	-0.0788869	0.331335	-0.116906	-0.0852892	-0.117316	-0.0804831	0.277364	-0.0840263	-0.0989948	-0.0826861	0.415286	-0.0273177	0.001911	-0.0826862	0.353295	0.0965487	0.142574	-0.164473	0.485263	0.115381	0.0147232	-0.0426148	0.413169	0.064472	0.0147151	-0.0223482	0.253462	0.303017	0.450529	0.788946
	210-224 p2	Tau12	0.814019	0.600251	0.456773	0.30617	0.80905	0.573455	0.517163	0.280986	0.788333	0.589095	0.431675	0.323903	0.801137	0.618994	0.441121	0.102079	0.789843	0.622663	0.282042	0.40256	0.769923	0.640437	0.48194	0.168653	0.777569	0.633614	0.564763	0.555891	0.630782	0.426349	0.564764	0.134923	0.779612	0.683316	0.604115	0.570045	0.749705	0.660585	0.666098	0.522186	0.29207	0.248238	0.458898	0.309772	0.85074	0.736659	0.426967
		HT7	0.78644	0.576157	0.350406	0.109731	0.821379	0.541065	0.412121	0.0927683	0.736355	0.561359	0.340578	0.161886	0.739575	0.61593	0.318367	-0.0859207	0.771627	0.619415	0.0764948	0.33059	0.70496	0.655186	0.385126	-0.000447758	0.681301	0.57542	0.468956	0.439425	0.483518	0.31598	0.468956	-0.0398254	0.64028	0.603722	0.556537	0.527127	0.602393	0.610569	0.579199	0.422827	0.147868	0.114857	0.357877	0.145872	0.744323	0.577728	0.322025
		77G7	0.653296	0.526387	0.404033	0.284627	0.567458	0.482833	0.406587	0.267397	0.566975	0.494609	0.333885	0.322241	0.474762	0.429377	0.303958	0.0598724	0.582303	0.372026	0.239116	0.337934	0.564913	0.529116	0.408329	0.218149	0.647262	0.589035	0.422477	0.50949	0.52002	0.386627	0.422477	0.141849	0.609218	0.290627	0.442911	0.463001	0.638732	0.595582	0.454553	0.501719	0.312384	0.285323	0.361881	0.25423	0.64324	0.592707	0.169939
		TauAB	0.705958	0.378132	0.135197	-0.0160926	0.727683	0.339838	0.236668	-0.0199638	0.596671	0.32674	0.103402	-0.0067182	0.6749	0.44378	0.129775	-0.193596	0.70275	0.47842	-0.0311133	0.181516	0.578062	0.487941	0.168376	-0.170808	0.549037	0.387092	0.262974	0.290923	0.383596	0.149563	0.262974	-0.1943	0.537001	0.434109	0.333457	0.452395	0.490973	0.407782	0.404777	0.266388	-0.0236027	-0.0839629	0.136947	-0.00707256	0.69355	0.571868	0.424142
	210-224 p3	Tau12
		HT7
		77G7
		TauAB
	212-224 p1	Tau12	0.0680811	0.210105	0.354297	0.10811	0.223	0.146408	0.348581	0.374933	0.297541	0.417147	0.436535	0.178701	0.166509	0.287971	0.393569	0.0477384	0.195363	0.249773	0.339214	0.516822	0.199269	0.246294	0.430745	0.155412	0.270813	0.245303	0.460539	0.242591	0.0622575	0.0687377	0.460539	0.1087	0.203579	0.58352	0.675252	0.339273	0.169643	0.167658	0.39452	0.16833	0.207025	0.161388	0.441691	0.0977081	0.276312	0.0373378	-0.0321675
		HT7	0.801615	0.665183	0.461763	0.262436	0.771289	0.642128	0.469382	0.220508	0.736065	0.638185	0.430565	0.338654	0.664917	0.617746	0.371178	0.0353825	0.734339	0.57931	0.141789	0.342818	0.719228	0.68988	0.476404	0.178883	0.735845	0.681938	0.523149	0.579113	0.553334	0.435485	0.523149	0.121791	0.686602	0.542357	0.56798	0.574894	0.689455	0.729684	0.597216	0.583873	0.286737	0.275219	0.442173	0.284784	0.755486	0.618685	0.256822
		77G7	0.741338	0.661523	0.580686	0.521949	0.649094	0.65971	0.541647	0.437526	0.710175	0.650819	0.532705	0.58351	0.609673	0.556472	0.483639	0.290337	0.648663	0.498661	0.448718	0.380708	0.708714	0.620472	0.574354	0.430824	0.775776	0.722099	0.600422	0.758803	0.659928	0.550943	0.600422	0.37782	0.788063	0.578415	0.594937	0.668232	0.817555	0.806035	0.63688	0.756505	0.461431	0.458412	0.558247	0.486935	0.805499	0.776506	0.357675
		TauAB	0.395949	0.410532	0.47112	0.38525	0.431785	0.369431	0.410532	0.578222	0.50346	0.554479	0.487525	0.491429	0.329287	0.386367	0.41961	0.18642	0.433423	0.317496	0.509172	0.482449	0.424645	0.432326	0.522829	0.336966	0.546453	0.497077	0.549206	0.70435	0.296082	0.239255	0.549206	0.274488	0.535196	0.686623	0.718003	0.831742	0.548501	0.529654	0.522263	0.650237	0.319718	0.266958	0.538526	0.285502	0.712483	0.548429	0.353886
	225-240 p1	Tau12	0.910676	0.762058	0.652446	0.57243	0.830954	0.753144	0.708395	0.439172	0.864308	0.680944	0.580408	0.521891	0.879067	0.733279	0.633095	0.415108	0.841463	0.727313	0.416764	0.510665	0.891078	0.745409	0.641222	0.45643	0.895752	0.795881	0.689948	0.638574	0.873491	0.716028	0.689948	0.431211	0.917427	0.606014	0.595683	0.396825	0.909757	0.784005	0.778413	0.625157	0.581752	0.549854	0.591769	0.606543	0.861543	0.834609	0.408113
		HT7	0.910552	0.75868	0.640139	0.54466	0.821063	0.721823	0.707163	0.420612	0.832242	0.659996	0.538395	0.46566	0.833294	0.725253	0.615276	0.395486	0.852756	0.711526	0.444045	0.574914	0.861534	0.767605	0.628906	0.448553	0.884629	0.803608	0.661942	0.593327	0.872631	0.720462	0.661942	0.405036	0.89435	0.458419	0.571458	0.328432	0.893077	0.761282	0.738998	0.574726	0.605848	0.559323	0.565065	0.564772	0.823249	0.828339	0.342575
		77G7	0.851443	0.832348	0.77061	0.66511	0.765861	0.830476	0.751893	0.583842	0.856845	0.808469	0.721633	0.690352	0.756634	0.740719	0.695598	0.468046	0.763255	0.68384	0.480568	0.555017	0.864074	0.77293	0.761866	0.597109	0.913288	0.87739	0.782185	0.794361	0.831306	0.753224	0.782185	0.548874	0.904767	0.6823	0.72483	0.549213	0.928156	0.890714	0.814723	0.792106	0.667889	0.661087	0.7241	0.684413	0.857556	0.782105	0.303361
		TauAB	0.521676	0.358354	0.256883	0.302049	0.463933	0.373613	0.195437	0.240176	0.474917	0.380728	0.245722	0.409025	0.412882	0.288757	0.171272	0.0657036	0.450116	0.262697	0.330524	0.0878689	0.450199	0.361746	0.26358	0.160813	0.499748	0.416819	0.31554	0.673882	0.339863	0.206488	0.31554	0.131455	0.560996	0.547047	0.373026	0.846124	0.579992	0.610354	0.375987	0.660644	0.108992	0.108319	0.312195	0.188753	0.706506	0.701548	0.485274
	225-240 p2	Tau12	0.640409	0.335457	0.214061	0.205091	0.615328	0.328166	0.289268	0.135411	0.575659	0.300524	0.177882	0.192263	0.668922	0.371048	0.226923	0.0349355	0.618439	0.406221	0.249415	0.173935	0.574718	0.379796	0.227698	0.0228142	0.573749	0.378984	0.320298	0.419064	0.486471	0.231636	0.320298	0.0193065	0.636732	0.518806	0.339552	0.514674	0.600682	0.441501	0.444062	0.38479	0.0973201	0.0458449	0.216715	0.172512	0.741102	0.726128	0.576475
		HT7	0.651567	0.358009	0.193857	0.119838	0.626682	0.343103	0.248294	0.0421012	0.57064	0.333189	0.163227	0.152084	0.624188	0.366525	0.168117	-0.0894423	0.612971	0.382483	0.195223	0.139861	0.561083	0.405153	0.210014	-0.044279	0.568531	0.397592	0.298423	0.418479	0.436887	0.192967	0.298423	-0.0683492	0.603707	0.481785	0.357486	0.5619	0.576081	0.492504	0.413379	0.394494	0.0380545	0.00495084	0.200872	0.0873887	0.709847	0.68237	0.476616
		77G7	0.608878	0.365016	0.284964	0.289399	0.590669	0.366329	0.314969	0.268858	0.585711	0.375208	0.266451	0.323801	0.617028	0.378809	0.274686	0.0949285	0.588093	0.388288	0.327666	0.206463	0.566651	0.391924	0.304801	0.118183	0.593691	0.420936	0.388417	0.564092	0.455095	0.238262	0.388417	0.108683	0.654024	0.634473	0.443009	0.690113	0.631847	0.505906	0.485867	0.531383	0.142846	0.0954884	0.305168	0.236425	0.803426	0.751031	0.624606
		TauAB	0.468447	0.198963	0.0552852	0.129275	0.429403	0.211298	0.038506	0.0851484	0.376221	0.194573	0.0368438	0.212148	0.38644	0.177661	-0.00210834	-0.0836882	0.420201	0.182396	0.169451	-0.0434376	0.354673	0.245548	0.0680957	-0.0459389	0.380276	0.249173	0.138477	0.514969	0.218754	0.0337167	0.138477	-0.057617	0.45015	0.437269	0.209862	0.779566	0.449923	0.423912	0.237169	0.50118	-0.0834109	-0.108931	0.103609	0.0218494	0.664888	0.657621	0.590858
	225-240p3	Tau12	0.621034	0.348148	0.220321	0.202232	0.588933	0.342943	0.251018	0.150253	0.557789	0.340017	0.193442	0.245514	0.590182	0.345123	0.18994	-0.0124256	0.582369	0.353453	0.258391	0.142792	0.543403	0.383441	0.236419	0.0312135	0.567743	0.40045	0.319201	0.51072	0.427337	0.197879	0.319201	0.0111846	0.61877	0.537838	0.376653	0.663934	0.600855	0.507473	0.423336	0.484183	0.071641	0.034836	0.23848	0.144317	0.756402	0.726534	0.550893
		HT7	0.594442	0.398168	0.246783	0.168164	0.543293	0.389893	0.227072	0.108409	0.520941	0.402622	0.222864	0.271189	0.469244	0.331179	0.152204	-0.0849113	0.521748	0.298151	0.211987	0.118143	0.501297	0.410734	0.257892	0.0456117	0.549991	0.448141	0.313614	0.542356	0.37166	0.200526	0.313614	-0.00328649	0.559498	0.453558	0.396481	0.694364	0.568935	0.584476	0.381945	0.537676	0.0740141	0.069092	0.259136	0.11197	0.675767	0.635185	0.368416
		77G7	0.489443	0.286146	0.306307	0.411216	0.439013	0.288931	0.30843	0.403244	0.492563	0.319263	0.276796	0.429472	0.498399	0.268328	0.298206	0.222609	0.470177	0.265016	0.51193	0.227431	0.476807	0.282989	0.31904	0.243511	0.550914	0.378925	0.383442	0.624878	0.451106	0.242166	0.383443	0.231784	0.646736	0.59197	0.420009	0.723015	0.643485	0.468181	0.444305	0.577464	0.216456	0.163499	0.334394	0.301882	0.779098	0.793336	0.648605
		TauAB	0.316682	0.0914989	-0.00891382	0.14726	0.263736	0.11394	-0.0687081	0.105836	0.220887	0.0983065	-0.035952	0.247304	0.194018	0.0464293	-0.0866516	-0.0465745	0.269856	0.0312523	0.225944	-0.114372	0.19766	0.130663	-0.00342691	-0.00941402	0.249101	0.155409	0.0421502	0.548722	0.0873194	-0.0456196	0.0421503	-0.0185036	0.337276	0.326551	0.129712	0.842638	0.356895	0.357315	0.112581	0.547757	-0.113813	-0.137321	0.0358408	0.0076751	0.590939	0.629579	0.656018
	386-406 p1	Tau12	0.0827598	-0.152577	-0.47535	-0.635451	0.164914	-0.155035	-0.389973	-0.660719	-0.0622566	-0.234342	-0.435798	-0.597838	0.0843955	-0.049515	-0.465354	-0.643415	0.0787803	0.0329338	-0.724406	-0.409005	-0.0690402	-0.025653	-0.455573	-0.692598	-0.219971	-0.25583	-0.386928	-0.431122	-0.293301	-0.369373	-0.386927	-0.670395	-0.272541	-0.148679	-0.340424	-0.148991	-0.329206	-0.187878	-0.257621	-0.407092	-0.58983	-0.569294	-0.433907	-0.566444	-0.17542	-0.272393	-0.127983
		HT7	0.754018	0.554752	0.437993	0.348331	0.681671	0.561556	0.517197	0.164982	0.701489	0.4734	0.389602	0.30667	0.784241	0.53786	0.435931	0.20417	0.674934	0.556279	0.253715	0.279224	0.739059	0.520706	0.422302	0.221806	0.716883	0.571874	0.490127	0.389679	0.727656	0.520597	0.490127	0.213278	0.745007	0.484273	0.404177	0.220149	0.720324	0.585472	0.593616	0.382979	0.348452	0.33997	0.377127	0.40685	0.657695	0.662785	0.321836
		77G7	0.384195	0.607249	0.471029	0.22597	0.422849	0.667809	0.371069	0.134176	0.46795	0.63541	0.557562	0.391934	0.326345	0.550781	0.375041	0.15645	0.2956	0.499111	-0.146126	0.145208	0.446314	0.533614	0.467644	0.291288	0.364149	0.512595	0.468136	0.394786	0.239491	0.417056	0.468136	0.284711	0.26669	0.564474	0.461469	0.261775	0.279087	0.603084	0.466852	0.461671	0.284385	0.385698	0.486071	0.366239	0.210543	-0.0166051	-0.184522
		TauAB	0.208051	0.0723933	0.115618	0.0824535	0.171981	0.0320523	0.0985766	0.109173	0.185161	0.141547	0.0588339	0.15547	0.102694	0.0140928	0.0435147	-0.103172	0.21327	-0.0587311	0.455557	0.153887	0.157318	0.0792055	0.132691	0.0234878	0.303765	0.183766	0.150908	0.371696	0.135507	-0.0282481	0.150908	-0.0381257	0.321545	0.138851	0.344489	0.549825	0.336428	0.231787	0.13907	0.360148	0.0207615	-0.0285815	0.0669959	0.0104343	0.463738	0.511792	0.456121
	386-406 p2	Tau12	0.313639	0.107081	0.108453	-0.0641693	0.411926	0.0406134	0.251555	0.0866999	0.383663	0.170394	0.130408	-0.121139	0.490737	0.243989	0.216301	-0.138445	0.412055	0.300997	0.137301	0.317866	0.343277	0.189017	0.168032	-0.162565	0.347504	0.139307	0.264247	-0.00942377	0.25536	0.0157417	0.264247	-0.175954	0.34123	0.435016	0.366306	0.108524	0.263196	0.0399858	0.332602	-0.099823	-0.000534686	-0.0838003	0.153022	-0.0612917	0.3938	0.260742	0.175344
		HT7	0.441573	0.424616	0.413799	0.474183	0.34357	0.509744	0.384833	0.170559	0.460538	0.373914	0.413446	0.485643	0.507265	0.352287	0.394253	0.399676	0.315097	0.358146	0.329446	0.0494961	0.512324	0.291616	0.364191	0.390917	0.467452	0.417538	0.400136	0.433203	0.564706	0.502644	0.400136	0.424111	0.553054	0.479886	0.25415	0.210219	0.555421	0.554526	0.452562	0.46297	0.356176	0.425499	0.380112	0.52271	0.391105	0.491204	0.272175
		77G7	0.489801	0.461314	0.354798	0.24879	0.41297	0.429401	0.301365	0.289015	0.415785	0.44988	0.30616	0.333969	0.261135	0.331184	0.215499	0.00874053	0.404489	0.254778	0.0927108	0.244187	0.404349	0.449784	0.357136	0.22711	0.49577	0.508427	0.339453	0.474085	0.355675	0.30848	0.339454	0.135303	0.431183	0.201613	0.355423	0.434159	0.490785	0.524621	0.330174	0.477412	0.271851	0.268143	0.331633	0.200122	0.467384	0.38205	-0.0289059
		TauAB	-0.223151	-0.277198	-0.312679	-0.291175	-0.229351	-0.285228	-0.290051	-0.0535378	-0.231813	-0.262241	-0.247094	-0.270809	-0.207131	-0.303014	-0.306558	-0.339706	-0.246519	-0.262729	-0.609955	-0.290982	-0.24255	-0.286958	-0.288121	-0.318355	-0.246095	-0.290613	-0.280492	-0.346158	-0.253983	-0.311026	-0.280492	-0.323776	-0.309264	-0.12411	-0.356431	-0.214076	-0.295613	-0.359825	-0.276638	-0.388521	-0.314066	-0.311058	-0.215063	-0.347444	-0.267906	-0.441241	-0.511309
	386-406 p3	Tau12
		HT7
		77G7
		TauAB
	407-438 p1	Tau12
		HT7
		77G7	0.595907	0.742345	0.805278	0.548107	0.619528	0.725874	0.760003	0.610651	0.774021	0.866977	0.847412	0.64545	0.601481	0.688786	0.756675	0.367218	0.576742	0.612145	0.511914	0.648687	0.725807	0.666251	0.835258	0.556068	0.796056	0.77987	0.860991	0.692959	0.628376	0.610273	0.860991	0.495411	0.735377	0.869111	0.933628	0.530344	0.739083	0.767281	0.8238	0.663113	0.618223	0.62678	0.822518	0.58768	0.678111	0.472646	0.053942
		TauAB
	407-438 p2	Tau12
		HT7
		77G7
		TauAB
	407-438 p3	Tau12
		HT7
		77G7
		TauAB
SI	175-190 p1	HT7	0.403254	0.278021	0.275715	0.41977	0.338895	0.299229	0.211949	0.476964	0.378549	0.308351	0.241597	0.504935	0.291649	0.209981	0.198745	0.227433	0.363788	0.160147	0.349417	0.138128	0.355146	0.266451	0.284239	0.291978	0.451643	0.363544	0.306311	0.721767	0.281843	0.181397	0.306311	0.274777	0.50712	0.49211	0.362561	0.846763	0.542176	0.448224	0.338888	0.718115	0.191803	0.143074	0.277819	0.318558	0.751423	0.694855	0.683613
		77G7	0.0683462	-0.0819521	0.00944504	0.321672	0.00436042	-0.0289389	-0.0571508	0.336876	0.0558127	-0.0427247	-0.0165969	0.379794	0.0451068	-0.120791	-0.0203946	0.20893	0.0508877	-0.140731	0.382357	-0.115169	0.0453574	-0.107394	0.00544378	0.174268	0.133648	0.0114381	0.0300626	0.540755	0.043981	-0.0658856	0.0300626	0.201015	0.265165	0.31968	0.0813652	0.744027	0.290785	0.138479	0.0593959	0.537537	-0.0131274	-0.0606039	0.0190562	0.187781	0.526698	0.590266	0.831452
		TauAB	-0.113711	-0.270288	-0.178819	0.134652	-0.154149	-0.207178	-0.238029	0.149929	-0.132786	-0.229372	-0.193383	0.203933	-0.113826	-0.286883	-0.199802	0.0642597	-0.116862	-0.299767	0.236438	-0.28165	-0.141838	-0.2899	-0.183284	0.00319151	-0.071083	-0.194284	-0.159374	0.350107	-0.15814	-0.25591	-0.159374	0.0454121	0.0543133	0.166246	-0.0753625	0.618805	0.070538	-0.0690909	-0.129739	0.364662	-0.199769	-0.24159	-0.184399	0.0300144	0.341526	0.411425	0.824126
	210-224 p1	HT7	-0.278339	-0.336931	-0.167649	0.175346	-0.313823	-0.287229	-0.246164	0.205238	-0.275067	-0.28451	-0.201215	0.216314	-0.295952	-0.353642	-0.182166	0.172921	-0.249142	-0.386889	0.361888	-0.201111	-0.284733	-0.353368	-0.176512	0.10324	-0.187913	-0.25038	-0.189463	0.310428	-0.241417	-0.258662	-0.189463	0.141028	-0.0615497	0.00126119	-0.0957204	0.514313	-0.0336164	-0.162747	-0.208455	0.327627	-0.119441	-0.170651	-0.192516	0.0631002	0.200487	0.32143	0.781783
		77G7	-0.168839	-0.215555	-0.168583	0.124901	-0.236338	-0.154885	-0.228915	0.0256401	-0.26167	-0.272193	-0.243694	0.135723	-0.261019	-0.247116	-0.212141	0.177988	-0.183495	-0.282828	0.135156	-0.250938	-0.231749	-0.228744	-0.206428	0.0934624	-0.194274	-0.181509	-0.245784	0.195255	-0.187622	-0.136692	-0.245784	0.137854	-0.10803	-0.239356	-0.23049	0.24859	-0.0728054	-0.127888	-0.240428	0.268934	-0.0775407	-0.106698	-0.275904	0.109272	0.0877173	0.230797	0.68441
		TauAB	-0.240383	-0.438076	-0.40825	-0.0787425	-0.263759	-0.372317	-0.474063	-0.078697	-0.297732	-0.40383	-0.404573	0.010455	-0.251702	-0.43923	-0.430976	-0.140044	-0.24373	-0.42896	0.0632014	-0.484126	-0.312896	-0.422379	-0.410139	-0.21839	-0.27417	-0.383549	-0.377445	0.197842	-0.365465	-0.457978	-0.377445	-0.168786	-0.140232	0.0357628	-0.275719	0.596353	-0.129627	-0.19278	-0.331215	0.213531	-0.438619	-0.463006	-0.370574	-0.213231	0.17411	0.270358	0.739575
	210-224 p2	HT7	0.261874	0.0638299	0.0929918	0.20039	0.283126	0.0831253	0.109992	0.29703	0.290171	0.120503	0.0974663	0.24306	0.325249	0.112911	0.113246	0.0818424	0.294319	0.121362	0.243458	0.0663398	0.257477	0.0878094	0.122713	0.0486348	0.302137	0.125622	0.191044	0.432289	0.150771	-0.0194651	0.191044	0.0690291	0.371461	0.530688	0.28993	0.642833	0.348604	0.162296	0.25847	0.404694	-0.0105917	-0.0830246	0.11053	0.145808	0.630509	0.540782	0.744107
		77G7	0.125984	-0.101663	-0.0771217	0.112507	0.138631	-0.0639615	-0.0628531	0.169398	0.128254	-0.0646076	-0.0697287	0.144932	0.207604	-0.0449384	-0.0445219	0.0280879	0.152225	-0.0145699	0.163357	-0.112986	0.106805	-0.0756339	-0.0574149	-0.0538139	0.128681	-0.0496952	0.0121996	0.319265	0.0219835	-0.146516	0.0121995	-0.0114586	0.230347	0.405933	0.086455	0.576078	0.205972	0.0256057	0.0914459	0.297965	-0.150662	-0.212781	-0.0484474	0.0401982	0.495097	0.464559	0.763367
		TauAB	0.134494	-0.0643233	-0.0205459	0.153479	0.135615	-0.0243543	-0.0223818	0.212092	0.143719	-0.0175136	-0.0202253	0.206939	0.18867	-0.033562	-0.0115748	0.0522878	0.151292	-0.0283734	0.209716	-0.0857851	0.122526	-0.0596109	-0.00391429	0.00270359	0.168498	-0.002189	0.0545849	0.378755	0.0413982	-0.116068	0.0545848	0.0357286	0.257234	0.407151	0.148084	0.614312	0.243427	0.0649332	0.117013	0.37023	-0.103327	-0.163128	-0.0184808	0.0954886	0.526759	0.489178	0.790122
	210-224 p3	HT7	0.154123	-0.0771467	-0.0421506	0.113583	0.163429	-0.0803899	-0.0476622	0.21067	0.140296	-0.00980718	-0.0643017	0.164878	0.14842	-0.0433974	-0.0444923	-0.022915	0.200879	-0.0492013	0.35103	0.0113424	0.0979176	-0.016952	-0.0107765	-0.0379456	0.184729	0.0169803	0.0456893	0.430694	0.0107019	-0.16752	0.0456893	-0.036808	0.277434	0.350535	0.205746	0.752889	0.267357	0.103768	0.0963134	0.39637	-0.124097	-0.207789	-0.012581	-0.0140496	0.583728	0.583641	0.799915
		77G7	-0.21342	-0.364299	-0.415506	-0.170482	-0.162841	-0.315818	-0.481069	-0.105483	-0.256217	-0.32082	-0.375237	-0.0710575	-0.228115	-0.306356	-0.421915	-0.196543	-0.178827	-0.274733	-0.115199	-0.415449	-0.301379	-0.278365	-0.394226	-0.282943	-0.319298	-0.357937	-0.356022	0.156095	-0.459605	-0.470959	-0.356022	-0.232884	-0.223874	0.117828	-0.238284	0.600577	-0.228906	-0.169632	-0.298667	0.160083	-0.47244	-0.495943	-0.312294	-0.300666	0.122728	0.114585	0.577326
		TauAB	0.15708	-0.0684496	0.011196	0.329671	0.0914911	-0.0368128	0.000843287	0.347867	0.131173	-0.0553327	-0.0261756	0.317898	0.186029	-0.0715938	0.0293301	0.225099	0.154995	-0.0526866	0.394746	-0.0407212	0.129018	-0.0671619	0.0121258	0.146698	0.200966	0.0294977	0.0572713	0.468045	0.163069	-0.0156284	0.0572713	0.176251	0.349877	0.335335	0.0579703	0.638202	0.357052	0.119957	0.114985	0.429786	0.0181568	-0.0516354	0.0407181	0.176008	0.567862	0.649338	0.789127
	212-224 p1	HT7	0.245166	-0.00274626	-0.0636204	0.0481879	0.229395	0.018274	-0.0830126	0.10476	0.187112	0.0311917	-0.0743428	0.150537	0.188935	-0.0109093	-0.113668	-0.13275	0.231851	-0.0237915	0.111357	-0.12983	0.156532	0.0306713	-0.0425763	-0.108924	0.215259	0.0617133	0.0158768	0.425935	0.0185757	-0.155959	0.0158769	-0.108757	0.273195	0.351631	0.147634	0.751308	0.274179	0.178013	0.0889647	0.424751	-0.19279	-0.242327	-0.0493846	-0.0368837	0.579665	0.527991	0.711031
		77G7	-0.293848	-0.506547	-0.458137	-0.173427	-0.317561	-0.45369	-0.515351	-0.191178	-0.339568	-0.449277	-0.446661	-0.078416	-0.284735	-0.516646	-0.478439	-0.257976	-0.29872	-0.50545	0.10882	-0.513716	-0.356404	-0.500954	-0.457783	-0.309778	-0.303056	-0.440464	-0.415568	0.103095	-0.385211	-0.522907	-0.415568	-0.273769	-0.167871	-0.0114028	-0.284927	0.536315	-0.163558	-0.228664	-0.379701	0.105368	-0.508112	-0.519573	-0.409432	-0.320222	0.0918977	0.229604	0.624063
		TauAB	-0.324861	-0.599258	-0.54338	-0.343067	-0.365429	-0.581459	-0.485893	-0.469475	-0.428785	-0.627372	-0.601456	-0.37875	-0.260336	-0.569183	-0.508726	-0.32863	-0.307107	-0.538152	0.0940542	-0.465915	-0.394672	-0.587014	-0.563794	-0.439809	-0.358189	-0.539727	-0.529717	-0.302028	-0.300367	-0.504046	-0.529717	-0.403178	-0.240672	-0.42543	-0.437055	-0.0490849	-0.265587	-0.46561	-0.483791	-0.287203	-0.50031	-0.533646	-0.619664	-0.383796	-0.140868	0.119683	0.514712
	225-240 p1	HT7	0.191653	-0.0438869	-0.0170168	0.127403	0.182948	-0.0330753	-0.0230023	0.160226	0.170208	0.00938805	-0.0432549	0.185418	0.189835	-0.0270068	-0.0295891	-0.0164596	0.213556	-0.0370553	0.363561	-0.0236444	0.141238	-0.0105884	0.00283643	-0.0259492	0.220763	0.0453625	0.0616763	0.435471	0.0653116	-0.124311	0.0616763	-0.0211936	0.317074	0.351279	0.209211	0.722434	0.307104	0.148954	0.118219	0.416981	-0.110065	-0.177086	-0.0132045	0.0277882	0.586987	0.613202	0.817818
		77G7	-0.313459	-0.512968	-0.407116	-0.187565	-0.308007	-0.482433	-0.429875	-0.176999	-0.312922	-0.427211	-0.395002	-0.120644	-0.245942	-0.491424	-0.393482	-0.252646	-0.279888	-0.479871	0.212709	-0.387432	-0.335917	-0.50466	-0.396043	-0.305893	-0.267703	-0.435797	-0.347138	0.0310545	-0.34466	-0.50994	-0.347138	-0.276645	-0.143174	0.00823536	-0.181552	0.431772	-0.157096	-0.282118	-0.325689	0.0155724	-0.458355	-0.487483	-0.373132	-0.310295	0.0787228	0.209794	0.597683
		TauAB	-0.308575	-0.495514	-0.409837	-0.210035	-0.300256	-0.456652	-0.446117	-0.203337	-0.31741	-0.411018	-0.398413	-0.113036	-0.271872	-0.483633	-0.419885	-0.281487	-0.282403	-0.488685	0.158658	-0.419237	-0.342227	-0.491044	-0.400068	-0.316845	-0.273184	-0.425516	-0.357485	0.0576943	-0.384511	-0.527324	-0.357485	-0.288501	-0.166652	-0.00152485	-0.167167	0.472878	-0.175303	-0.270153	-0.337291	0.0640047	-0.48081	-0.505879	-0.398775	-0.306431	0.0911397	0.194823	0.645788
	225-240 p2	HT7	-0.0204275	-0.238089	-0.186583	0.0519563	-0.0286172	-0.193707	-0.206261	0.109521	-0.0319777	-0.186292	-0.183656	0.116574	0.0189574	-0.217854	-0.183988	-0.04571	-0.00599255	-0.207936	0.168776	-0.238714	-0.0538415	-0.227914	-0.172871	-0.1047	0.00013042	-0.168692	-0.118983	0.299344	-0.117565	-0.275721	-0.118984	-0.0681567	0.110046	0.272901	-0.0141774	0.620082	0.103714	-0.0583226	-0.0628723	0.289952	-0.251916	-0.30484	-0.163403	-0.049242	0.403741	0.417117	0.774215
		77G7	-0.184882	-0.373942	-0.273047	0.0375792	-0.198962	-0.319713	-0.307161	0.0828962	-0.18357	-0.315348	-0.264071	0.0883952	-0.121161	-0.355037	-0.255384	-0.0212902	-0.165663	-0.336487	0.193021	-0.321047	-0.200446	-0.375463	-0.266335	-0.110573	-0.146402	-0.302094	-0.222119	0.224493	-0.215945	-0.350403	-0.222119	-0.0613142	-0.00877156	0.179189	-0.13714	0.549178	-0.0110108	-0.172971	-0.182604	0.210973	-0.29787	-0.342241	-0.233743	-0.0902274	0.262688	0.332284	0.737458
		TauAB	-0.0796103	-0.294416	-0.227165	0.0321741	-0.0978873	-0.242814	-0.248526	0.054208	-0.0961684	-0.249175	-0.229593	0.0911733	-0.0330288	-0.280066	-0.223441	-0.0495534	-0.0706761	-0.270419	0.184457	-0.291152	-0.108945	-0.296844	-0.2217	-0.119281	-0.0551893	-0.224393	-0.172103	0.252521	-0.146123	-0.303023	-0.172103	-0.077147	0.0659019	0.201024	-0.0725509	0.562809	0.0605109	-0.105157	-0.120292	0.251026	-0.277458	-0.323148	-0.218412	-0.0631818	0.33873	0.393578	0.781445
	225-240p3	HT7	-0.164183	-0.319933	-0.24045	0.0725876	-0.200594	-0.260134	-0.313377	0.115503	-0.18949	-0.267518	-0.246485	0.163707	-0.187681	-0.344794	-0.274615	-0.0118413	-0.16808	-0.361308	0.179702	-0.334129	-0.207128	-0.331137	-0.240159	-0.0557763	-0.13017	-0.243367	-0.218708	0.330402	-0.240935	-0.331201	-0.218708	-0.0198252	-0.0123642	0.132844	-0.115819	0.655307	0.00945576	-0.100825	-0.194734	0.343409	-0.271461	-0.30935	-0.227077	-0.0521379	0.300181	0.358149	0.774494
		77G7	-0.276559	-0.445891	-0.363461	-0.00392715	-0.310802	-0.37746	-0.435346	0.0109501	-0.308406	-0.399359	-0.359924	0.0747954	-0.270712	-0.457948	-0.379218	-0.0591338	-0.27891	-0.452605	0.137043	-0.449139	-0.320931	-0.452535	-0.367782	-0.139354	-0.26469	-0.378393	-0.34199	0.22275	-0.335119	-0.42491	-0.34199	-0.088687	-0.121693	0.0531214	-0.256485	0.582163	-0.105474	-0.203516	-0.312289	0.231533	-0.374279	-0.4012	-0.327252	-0.147642	0.173252	0.279298	0.735658
		TauAB	-0.22395	-0.366432	-0.271984	0.0412567	-0.260591	-0.301426	-0.336558	0.0498099	-0.253568	-0.327065	-0.288533	0.118456	-0.23627	-0.384947	-0.299952	-0.00653755	-0.223537	-0.404076	0.17736	-0.361624	-0.260294	-0.385483	-0.279838	-0.068647	-0.189172	-0.296027	-0.266428	0.254558	-0.272902	-0.349019	-0.266428	-0.024764	-0.0714129	0.0353284	-0.163216	0.544697	-0.0527992	-0.171666	-0.247231	0.283042	-0.282313	-0.318625	-0.293432	-0.0509297	0.221143	0.308915	0.795216
	386-406 p1	HT7	0.305883	0.127392	0.116174	0.154764	0.348736	0.1342	0.101214	0.236143	0.349603	0.222147	0.149328	0.246258	0.34318	0.167428	0.114757	-0.014387	0.332834	0.172836	0.295667	0.0873169	0.292552	0.170745	0.157169	0.0069709	0.333345	0.184361	0.237925	0.500585	0.133524	-0.0267473	0.237925	0.00611269	0.399376	0.638255	0.38314	0.795981	0.375566	0.308948	0.299629	0.457053	-0.0486774	-0.0936419	0.19972	0.0565887	0.639877	0.550473	0.613656
		77G7	-0.0172744	-0.180428	-0.106491	0.0528839	0.0145295	-0.145372	-0.131506	0.145988	0.0246535	-0.0856187	-0.0806548	0.140381	0.0441117	-0.143013	-0.099196	-0.0458542	0.0211136	-0.144068	0.218251	-0.13845	-0.0168619	-0.167321	-0.0790858	-0.0776728	0.0406917	-0.115828	-0.0215023	0.325262	-0.118673	-0.254015	-0.0215023	-0.0496042	0.127583	0.384476	0.132401	0.651713	0.112248	-0.0170395	0.0174093	0.309649	-0.210435	-0.261628	-0.0713286	-0.0293218	0.417535	0.37892	0.729306
		TauAB	0.199162	0.0145077	0.0206898	0.151672	0.231114	0.0292207	0.000491796	0.266064	0.240816	0.104042	0.0653857	0.223159	0.255363	0.0552433	0.0378289	0.00232343	0.224662	0.0837571	0.215939	-0.00268213	0.186525	0.0581652	0.0607062	-0.0133362	0.219188	0.0711566	0.13883	0.44242	0.0593926	-0.0951213	0.13883	-0.000348909	0.307711	0.594633	0.230732	0.757382	0.290068	0.201499	0.201522	0.382151	-0.103153	-0.149043	0.145763	0.00693915	0.555266	0.474283	0.547648
	386-406 p2	HT7	0.181905	-0.0674476	-0.120006	-0.114024	0.246474	-0.0622393	-0.0918215	-0.0430635	0.175539	-0.00127235	-0.100117	-0.0278119	0.227065	0.0080952	-0.113118	-0.243331	0.227629	0.0220564	0.0810787	-0.0876451	0.128193	0.00225673	-0.079338	-0.253964	0.149461	-0.028214	0.00566	0.241355	-0.0573581	-0.244962	0.00566002	-0.243014	0.193484	0.395284	0.198814	0.608284	0.152312	0.0576987	0.0883276	0.225598	-0.283366	-0.34041	-0.0930964	-0.151532	0.481228	0.395169	0.666825
		77G7	-0.0227629	-0.253998	-0.244442	-0.138342	0.0335388	-0.231564	-0.235969	-0.0901269	-0.0106762	-0.173324	-0.211042	-0.0615759	0.0636831	-0.180381	-0.217628	-0.231346	0.0249326	-0.151436	0.122064	-0.221188	-0.052915	-0.202457	-0.212116	-0.281534	-0.0322821	-0.20906	-0.131162	0.159343	-0.182463	-0.358246	-0.131162	-0.251953	0.0566613	0.311275	0.0419297	0.558018	0.0182614	-0.0793126	-0.0633846	0.135686	-0.369542	-0.412591	-0.188248	-0.217819	0.322318	0.313093	0.648529
		TauAB	0.118487	-0.137847	-0.166131	-0.0975087	0.159603	-0.112431	-0.140782	-0.0834866	0.111025	-0.084425	-0.144478	-0.0257666	0.196741	-0.0724707	-0.148014	-0.209577	0.145102	-0.0452061	0.0994373	-0.181986	0.0802913	-0.096575	-0.139466	-0.250538	0.0906963	-0.0994738	-0.0526475	0.197898	-0.0573889	-0.256043	-0.0526475	-0.223178	0.166877	0.357214	0.098161	0.541827	0.126401	0.0145025	0.0335141	0.184789	-0.306026	-0.347211	-0.139017	-0.14144	0.411837	0.386521	0.670643
	386-406 p3	HT7	0.106218	0.00861014	0.0764732	-0.21477	0.190256	-0.0634357	0.170137	-0.114579	0.172796	0.11004	0.0604256	-0.183642	0.166311	0.0682422	0.0910691	-0.299147	0.197026	0.0209161	0.235724	0.26568	0.134799	0.0363596	0.121742	-0.201955	0.228014	0.0678905	0.164203	-0.0715761	0.0602696	-0.119259	0.164203	-0.254638	0.156009	0.101826	0.428611	0.0471659	0.106611	-0.056669	0.151572	-0.0875377	-0.0597621	-0.125462	-0.0220236	-0.120806	0.218708	0.134573	0.214937
		77G7	-0.23576	-0.298667	-0.235435	0.194765	-0.276164	-0.224057	-0.363222	0.24964	-0.257243	-0.261079	-0.217953	0.27128	-0.285918	-0.328311	-0.263706	0.161066	-0.248259	-0.321302	0.114285	-0.351439	-0.280453	-0.291453	-0.240053	0.0777934	-0.243833	-0.250124	-0.241533	0.400927	-0.303623	-0.270216	-0.241533	0.130153	-0.0998092	0.154064	-0.239933	0.693095	-0.0570967	-0.0552367	-0.228103	0.398826	-0.203047	-0.220187	-0.130174	-0.00578335	0.200043	0.260495	0.606792
		TauAB	0.266966	-0.00829226	-0.016144	0.283993	0.189381	0.0362678	0.0163773	0.238182	0.196212	-0.0647472	-0.053824	0.231027	0.32667	0.00655821	0.0231636	0.206434	0.235207	0.0645558	0.186611	-0.107487	0.220733	-0.00541966	-0.0275602	0.0819928	0.224212	0.0474524	0.0318191	0.340201	0.254075	0.0582916	0.0318191	0.131132	0.367054	0.305591	-0.0610553	0.432979	0.360131	0.12353	0.135758	0.310553	0.00389232	-0.0502527	0.00543569	0.177837	0.518158	0.593627	0.680176
	407-438 p1	HT7	0.393924	0.110122	-0.00471336	0.234819	0.325747	0.127433	-0.014996	0.215691	0.253785	0.0508711	-0.07024	0.247111	0.287197	0.102779	-0.0412795	0.0965436	0.3646	0.117127	0.175995	-0.0501085	0.251177	0.180258	-0.00444285	0.0505959	0.281622	0.171632	0.0376263	0.524854	0.179633	0.0341667	0.0376264	0.0620719	0.385919	0.264679	0.0418978	0.730051	0.399955	0.290822	0.139734	0.517038	-0.027985	-0.0943335	0.0131146	0.10153	0.662242	0.701436	0.776758
		77G7
		TauAB	0.568867	0.207467	0.0255449	-0.0434636	0.58064	0.154399	0.117428	-0.0860116	0.455135	0.178743	-0.023075	-0.0547575	0.544288	0.275588	0.0348405	-0.217706	0.588552	0.315318	0.189644	0.146344	0.432464	0.335402	0.0575964	-0.213214	0.438635	0.254505	0.152986	0.273794	0.300479	0.0325719	0.152986	-0.241289	0.484513	0.323856	0.260035	0.515409	0.438861	0.331756	0.279126	0.225267	-0.0980832	-0.167734	0.0533427	-0.115751	0.63849	0.646902	0.503283
	407-438 p2	HT7	-0.169603	-0.257212	-0.210341	-0.310625	-0.170506	-0.261021	-0.104712	-0.377342	-0.217414	-0.306391	-0.276112	-0.358445	-0.11462	-0.225277	-0.190563	-0.231398	-0.142463	-0.248576	-0.105533	-0.137349	-0.170917	-0.288663	-0.229253	-0.267231	-0.150557	-0.251685	-0.236271	-0.431045	-0.109626	-0.203371	-0.236271	-0.255188	-0.1943	-0.453802	-0.150334	-0.4962	-0.224427	-0.412883	-0.232245	-0.364963	-0.182755	-0.215235	-0.427747	-0.12254	-0.212921	-0.14967	0.20034
		77G7
		TauAB	0.56546	0.227426	0.144495	0.183491	0.533937	0.2097	0.252866	0.106951	0.490115	0.174845	0.0864481	0.112564	0.630433	0.286277	0.193167	0.0561512	0.565763	0.338845	0.297757	0.174135	0.50178	0.282272	0.154195	-0.00459139	0.504954	0.283079	0.245376	0.305965	0.475567	0.192167	0.245376	0.000587091	0.591429	0.391594	0.244082	0.374942	0.547046	0.308367	0.370649	0.259546	0.0840405	0.0120012	0.131321	0.142282	0.672711	0.718179	0.605774
	407-438 p3	HT7
		77G7
		TauAB	-0.207474	-0.0719923	0.0465587	-0.250012	-0.0435415	-0.118554	0.0764974	-0.0391094	-0.0407821	0.0823617	0.103938	-0.17829	-0.117168	0.0193365	0.0749444	-0.213747	-0.0775676	-0.0324999	0.0157778	0.227906	-0.106927	-0.0475436	0.102814	-0.13767	-0.0617082	-0.0748632	0.107504	-0.177255	-0.238841	-0.201042	0.107504	-0.163966	-0.177449	0.10736	0.366211	-0.0820664	-0.220077	-0.22357	0.0390074	-0.177409	-0.0701965	-0.106278	0.00340019	-0.12323	-0.0991799	-0.306198	-0.0434794
			Tau12	HT7	77G7	TauAB	Tau12	HT7	77G7	TauAB	Tau12	HT7	77G7	TauAB	Tau12	HT7	77G7	TauAB	Tau12	HT7	77G7	TauAB	Tau12	HT7	77G7	TauAB	Tau12	HT7	77G7	TauAB	Tau12	HT7	77G7	TauAB	Tau12	HT7	77G7	TauAB	Tau12	HT7	77G7	TauAB	Tau12	HT7	77G7	TauAB	HT7	77G7	TauAB
			6-23				25-44				45-68 0N				68-97 1N				68-87 2N				212-221				243-254				275-286 3R				299-317 4R				354-369				407-438				6-23
			TBS																																												SI
[truncated: 33 more columns]

## Sheet: e) PiD
e)
			TBS																																												SI
			6-23				25-44				45-68 0N				68-97 1N				68-87 2N				212-221				243-254				275-286 3R				299-317 4R				354-369				407-438				6-23
		PiD	Tau12	HT7	77G7	TauAB	Tau12	HT7	77G7	TauAB	Tau12	HT7	77G7	TauAB	Tau12	HT7	77G7	TauAB	Tau12	HT7	77G7	TauAB	Tau12	HT7	77G7	TauAB	Tau12	HT7	77G7	TauAB	Tau12	HT7	77G7	TauAB	Tau12	HT7	77G7	TauAB	Tau12	HT7	77G7	TauAB	Tau12	HT7	77G7	TauAB	HT7	77G7	TauAB
TBS	175-190 p1	Tau12	0.800469	0.865586	0.778322	0.503468	0.684264	0.798559	0.66593	0.46028	0.906179	0.810351	0.607909	0.567719	0.728402	0.771826	0.670661	0.533311	0.647809	0.676278	0.663355	0.331639	0.817337	0.768352	0.731646	0.518894	0.860468	0.864945	0.756994	0.603343	0.704448	0.805471	0.756994	0.553334	0.79989	0.843942	0.720522	0.687181	0.702447	0.771453	0.757753	0.675505	0.541567	0.561725	0.650433	0.591364	0.702408	0.610425	0.447974
		HT7	0.40122	0.654066	0.32477	0.11868	0.303994	0.482161	0.237336	0.0879678	0.521224	0.888221	0.286787	0.165872	0.313023	0.527342	0.244354	0.104124	0.239348	0.441445	0.339803	0.103534	0.397741	0.769522	0.334533	0.116194	0.410978	0.601822	0.367659	0.197635	0.23818	0.555853	0.367658	0.178421	0.317988	0.784102	0.386708	0.28385	0.232529	0.493978	0.384536	0.253677	0.111877	0.205146	0.196755	0.155517	0.476595	0.323184	0.469748
		77G7	0.556441	0.499276	0.331733	0.507451	0.571796	0.508478	0.802949	0.49155	0.566332	0.472668	-0.165092	0.545693	0.396384	0.381707	0.0612853	0.453533	0.465692	0.460273	0.104048	0.548398	0.315912	0.322928	0.0705427	0.445314	0.339335	0.320683	0.0974199	0.512928	0.280018	0.268584	0.0974199	0.540861	0.261277	0.240259	-0.0139802	0.483908	0.512002	0.576177	0.06193	0.457774	0.474741	0.471548	0.407623	0.427333	0.412997	0.423871	0.542898
		TauAB	0.768085	0.597622	0.649894	0.962412	0.842065	0.421851	0.833244	0.958702	0.592353	0.300975	0.16579	0.950081	0.706625	0.602782	0.474745	0.925442	0.702747	0.536422	0.426505	0.972369	0.451066	0.254153	0.350322	0.927728	0.436645	0.280793	0.338738	0.933733	0.599641	0.412305	0.338738	0.950833	0.428367	0.141734	0.158849	0.867276	0.860653	0.79316	0.310203	0.840238	0.928373	0.903402	0.785394	0.869303	0.144733	0.378975	0.426694
	210-224 p1	Tau12	-0.19915	-0.133245	-0.20844	-0.256556	-0.241323	-0.0757409	-0.066442	-0.269796	0.00762001	-0.0427884	-0.116029	-0.218462	-0.229591	-0.24415	-0.234144	-0.298496	-0.207443	-0.257247	-0.178038	-0.247816	-0.212505	-0.212683	-0.157375	-0.271452	-0.156733	-0.109516	-0.135974	-0.305505	-0.334352	-0.374258	-0.135973	-0.305383	-0.280403	-0.158873	-0.0801362	-0.258596	-0.271746	-0.328508	-0.176438	-0.353083	-0.225982	-0.232432	-0.185266	-0.293152	-0.443162	-0.531215	-0.340503
		HT7	-0.295155	-0.137204	-0.276365	-0.377781	-0.37211	0.150669	-0.0972106	-0.418937	0.0140789	0.192029	-0.149023	-0.255665	-0.373538	-0.294968	-0.33658	-0.440849	-0.406393	-0.322744	-0.270881	-0.309915	-0.270846	-0.0973981	-0.201632	-0.396802	-0.197545	-0.0253118	-0.161832	-0.401899	-0.489238	-0.379542	-0.161832	-0.416954	-0.31917	-0.0195399	-0.0880145	-0.35863	-0.359461	-0.327687	-0.189591	-0.471625	-0.352677	-0.321669	-0.288756	-0.448815	-0.303392	-0.543464	-0.343339
		77G7	-0.432751	-0.42291	-0.422885	-0.358577	-0.435899	-0.204711	-0.246689	-0.30173	-0.381079	-0.44853	-0.324325	-0.37082	-0.352702	-0.412925	-0.353996	-0.376405	-0.211996	-0.27849	-0.409783	-0.339682	-0.326776	-0.441227	-0.370836	-0.35649	-0.334454	-0.376143	-0.395877	-0.423416	-0.203119	-0.325943	-0.395877	-0.371737	-0.371039	-0.467476	-0.385452	-0.47046	-0.41389	-0.529949	-0.389616	-0.359609	-0.356141	-0.393092	-0.383935	-0.281169	-0.487299	-0.486393	-0.527255
		TauAB	0.235622	-0.0210714	0.158847	0.509368	0.306873	0.413117	0.436538	0.556313	0.172366	-0.242716	-0.13902	0.556317	0.164853	-0.0124564	0.0389099	0.467654	0.177991	-0.0534409	-0.0296128	0.535521	-0.000583858	-0.301922	-0.0688544	0.460316	0.018799	-0.176277	-0.0832477	0.464537	0.217586	-0.0231342	-0.0832476	0.519887	0.00560404	-0.306423	-0.201737	0.31572	0.40591	0.19396	-0.0896006	0.362475	0.476068	0.383359	0.289436	0.401172	-0.156283	-0.0505724	0.0413917
	210-224 p2	Tau12	0.132471	0.24336	-0.00251693	-0.277632	0.0512955	0.187895	-0.00522556	-0.277514	0.222533	0.395809	-0.0400321	-0.284469	0.0381785	0.149347	-0.0787645	-0.237996	0.0899231	0.266574	0.0161342	-0.35955	0.244692	0.446457	0.0438283	-0.289016	0.26543	0.359995	0.0807822	-0.170476	0.0823695	0.333168	0.0807821	-0.169478	0.223863	0.499759	0.151014	-0.0919331	-0.0709262	0.132592	0.0945887	-0.0405555	-0.274836	-0.25043	-0.156273	-0.177115	0.760969	0.582849	0.553571
		HT7	-0.129428	0.056048	-0.21513	-0.311704	-0.192385	0.0425309	-0.049384	-0.32661	0.077623	0.319589	-0.167278	-0.269577	-0.214546	-0.0975338	-0.288615	-0.359046	-0.19658	-0.086585	-0.177895	-0.263878	-0.142188	0.126154	-0.172617	-0.338638	-0.0992432	0.0635006	-0.135426	-0.312955	-0.323253	-0.151505	-0.135426	-0.304117	-0.231752	0.154125	-0.0682562	-0.248777	-0.281923	-0.150524	-0.156368	-0.321445	-0.309606	-0.264744	-0.251844	-0.338089	-0.0773609	-0.240952	0.0266588
		77G7	-0.3982	-0.473691	-0.447106	-0.464079	-0.393763	-0.584308	-0.402634	-0.408335	-0.396099	-0.491511	-0.350704	-0.547762	-0.410706	-0.518081	-0.441699	-0.44543	-0.297467	-0.399044	-0.487342	-0.516023	-0.372103	-0.493838	-0.394972	-0.496029	-0.327181	-0.405868	-0.378332	-0.473104	-0.382367	-0.430456	-0.378332	-0.428791	-0.337263	-0.4152	-0.297538	-0.448921	-0.457745	-0.511996	-0.416801	-0.438724	-0.464818	-0.541625	-0.458962	-0.451861	0.00743517	0.0597085	0.088199
		TauAB	-0.089797	0.0701196	-0.233098	-0.349424	-0.183569	0.35823	-0.0904126	-0.301675	0.100269	0.383599	-0.223913	-0.288094	-0.231414	-0.103571	-0.340007	-0.375905	-0.199359	-0.0642275	-0.287115	-0.348586	-0.0678247	0.217904	-0.219414	-0.398244	-0.01169	0.121722	-0.177236	-0.279153	-0.14992	0.143073	-0.177236	-0.223501	-0.125716	0.313944	-0.109447	-0.271683	-0.235955	-0.0599923	-0.157576	-0.200451	-0.380274	-0.371364	-0.361182	-0.320979	0.425663	0.195448	0.411889
	210-224 p3	Tau12
		HT7
		77G7
		TauAB
	212-224 p1	Tau12	0.116677	0.34698	0.12489	-0.262849	-0.0433802	0.570101	-0.0247647	-0.296217	0.399887	0.682211	0.262192	-0.145975	0.0172346	0.188964	0.0754875	-0.253126	-0.0702718	0.131746	0.131565	-0.343815	0.27477	0.532904	0.247393	-0.256765	0.343148	0.536731	0.296469	-0.153679	0.0333954	0.360435	0.296469	-0.189293	0.255394	0.683684	0.390119	-0.0583443	-0.0403664	0.14014	0.316877	-0.0703301	-0.232386	-0.18015	-0.0754103	-0.191098	0.548541	0.224417	0.222524
		HT7	-0.0269852	0.170829	-0.0816018	-0.229476	-0.121432	0.2467	0.048644	-0.256733	0.228662	0.469689	-0.0467028	-0.14613	-0.129502	-0.00994833	-0.179608	-0.27783	-0.145911	-0.0303183	-0.106091	-0.206346	-0.0261939	0.215713	-0.0434214	-0.254362	0.0384411	0.211285	0.00161019	-0.212696	-0.236037	-0.0415305	0.00161018	-0.217132	-0.0962441	0.278922	0.0611132	-0.142354	-0.1642	-0.0365396	-0.0205099	-0.222482	-0.218373	-0.174293	-0.143105	-0.253803	0.0494771	-0.155962	0.0474913
		77G7	-0.0591564	0.0759068	-0.194319	-0.339409	-0.126173	0.272269	0.0900391	-0.379083	0.169053	0.404728	-0.276103	-0.254139	-0.211951	-0.0856542	-0.349282	-0.370869	-0.180486	0.0195849	-0.211665	-0.289913	-0.0394335	0.240237	-0.191349	-0.37606	0.0105216	0.192456	-0.13805	-0.292377	-0.296463	-0.0688914	-0.138051	-0.296628	-0.0830514	0.272783	-0.0771532	-0.242275	-0.216424	-0.0381209	-0.151285	-0.293415	-0.338499	-0.295769	-0.254348	-0.37093	0.371796	0.100055	0.245277
		TauAB	0.0464253	0.108515	0.209486	-0.0579596	-0.0913046	0.671093	-0.0906386	-0.057949	0.307946	0.222393	0.457031	0.0923216	0.0295226	0.0345393	0.260886	-0.044772	-0.118587	-0.153658	0.183605	-0.188257	0.197134	0.0928038	0.334628	-0.0329302	0.278647	0.300059	0.349215	0.00036961	0.155661	0.227578	0.349215	-0.0302045	0.223349	0.313664	0.405253	0.0116384	0.0833772	-0.0169581	0.378943	0.0351883	-0.00793278	-0.0339705	0.0660575	-0.000228039	0.0430383	-0.186834	-0.285835
	225-240 p1	Tau12	0.645836	0.757229	0.685154	0.273746	0.504324	0.593781	0.349405	0.247005	0.73976	0.716452	0.715112	0.300981	0.624953	0.692934	0.679399	0.340816	0.525527	0.575688	0.658852	0.0471481	0.777306	0.758109	0.754651	0.312086	0.815135	0.83053	0.77586	0.400377	0.663961	0.827745	0.77586	0.343451	0.779743	0.885805	0.799834	0.51992	0.515242	0.606662	0.793403	0.536368	0.323041	0.344988	0.481838	0.427286	0.742267	0.641909	0.423613
		HT7	0.409705	0.649839	0.401828	0.0598732	0.2759	0.49031	0.066098	0.0538601	0.518523	0.815512	0.50541	0.0886436	0.364016	0.552629	0.402818	0.0904827	0.261218	0.422416	0.441802	-0.0590068	0.508997	0.784333	0.491249	0.0797235	0.530322	0.668996	0.517581	0.17759	0.39401	0.721044	0.517581	0.152727	0.463453	0.8803	0.570157	0.281184	0.241667	0.464639	0.553455	0.305298	0.0702043	0.137483	0.19179	0.176446	0.615244	0.464612	0.483816
		77G7	0.338718	0.404699	0.117144	0.0874094	0.299821	0.379691	0.429063	0.0833566	0.409433	0.540076	-0.188825	0.110382	0.180187	0.261162	-0.095385	0.0637274	0.255167	0.376319	-0.0141444	0.0945338	0.246934	0.434197	-0.0116502	0.036153	0.2747	0.350548	0.0288936	0.145964	0.127638	0.30305	0.0288935	0.173046	0.19235	0.409123	0.00792072	0.17057	0.188631	0.373987	0.0151413	0.181944	0.0595128	0.0808516	0.0766068	0.0838354	0.643607	0.537047	0.647902
		TauAB	0.864763	0.827852	0.76553	0.857348	0.863202	0.639207	0.79034	0.837551	0.781918	0.677933	0.391279	0.877019	0.776088	0.782396	0.602835	0.840161	0.706833	0.658965	0.590239	0.815257	0.639793	0.611588	0.549881	0.83697	0.642436	0.588568	0.557479	0.894967	0.679661	0.686041	0.557479	0.887384	0.60997	0.567709	0.430456	0.889745	0.868993	0.923374	0.548628	0.859882	0.836468	0.85121	0.780815	0.817046	0.462931	0.565275	0.606156
	225-240 p2	Tau12	-0.0895131	0.0873258	-0.120041	-0.447744	-0.230829	0.401139	-0.162136	-0.45052	0.192172	0.418243	0.0258592	-0.34957	-0.202491	-0.0778979	-0.175912	-0.441449	-0.234152	-0.0741922	-0.123893	-0.516959	0.0595795	0.273367	-0.00164939	-0.461044	0.137815	0.29476	0.0488699	-0.352858	-0.148804	0.140975	0.0488698	-0.357942	0.0447238	0.438644	0.161458	-0.28356	-0.244408	-0.102939	0.063141	-0.268997	-0.427648	-0.410413	-0.301373	-0.387302	0.47625	0.159053	0.204915
		HT7	-0.213163	0.0270183	-0.271003	-0.488258	-0.328283	0.258244	-0.226556	-0.483722	0.0513736	0.440825	-0.115899	-0.401228	-0.327696	-0.1502	-0.327794	-0.517428	-0.354194	-0.161581	-0.24563	-0.469592	-0.131175	0.232611	-0.16833	-0.514502	-0.069243	0.146653	-0.119911	-0.427277	-0.323853	0.00778829	-0.119911	-0.412718	-0.184803	0.345511	-0.0113183	-0.371509	-0.371567	-0.175513	-0.107221	-0.379076	-0.493429	-0.447724	-0.411377	-0.475522	0.245723	-0.0446242	0.173085
		77G7	-0.147778	-0.00918163	-0.267065	-0.443087	-0.231014	0.204249	-0.0547717	-0.455814	0.0867039	0.313328	-0.272821	-0.372018	-0.285713	-0.176353	-0.389948	-0.464999	-0.24381	-0.0756856	-0.288303	-0.42725	-0.0926528	0.1538	-0.228822	-0.479781	-0.0321423	0.127517	-0.177008	-0.390122	-0.315133	-0.0821125	-0.177008	-0.379781	-0.130131	0.226089	-0.0939045	-0.338958	-0.310227	-0.152103	-0.186382	-0.357736	-0.441774	-0.418834	-0.356789	-0.44372	0.364006	0.099171	0.233552
		TauAB	-0.157109	-0.0196986	-0.285984	-0.445807	-0.230017	0.179333	-0.240941	-0.408633	-0.0396381	0.30945	-0.237822	-0.414687	-0.290295	-0.144277	-0.362768	-0.441158	-0.273424	-0.078594	-0.295763	-0.444984	-0.0925038	0.238806	-0.239304	-0.485529	-0.0549939	0.0897394	-0.19603	-0.346819	-0.204277	0.139185	-0.19603	-0.306908	-0.100505	0.332413	-0.105247	-0.328139	-0.304086	-0.0772596	-0.167279	-0.257262	-0.480325	-0.462913	-0.438692	-0.415036	0.640179	0.414977	0.558013
	225-240p3	Tau12	0.015218	0.103072	-0.121724	-0.308709	-0.0713302	0.329131	-0.0666598	-0.267661	0.125835	0.329028	-0.156532	-0.277163	-0.113782	-0.0193954	-0.221935	-0.289308	-0.0691335	0.0772065	-0.194503	-0.367419	0.0960205	0.289951	-0.107093	-0.344608	0.139947	0.22059	-0.0675517	-0.198483	0.0135335	0.292623	-0.0675518	-0.159693	0.096121	0.389202	-0.00471613	-0.181601	-0.126364	0.0514667	-0.0417178	-0.0764212	-0.33175	-0.338239	-0.280859	-0.235364	0.781111	0.576216	0.594922
		HT7	-0.0130221	0.192869	-0.160362	-0.278674	-0.0613939	0.0721485	-0.181725	-0.241707	-0.00573927	0.480794	-0.137688	-0.303384	-0.104264	0.107891	-0.205116	-0.274601	-0.0908494	0.146977	-0.112874	-0.250117	0.0155935	0.47118	-0.129032	-0.305787	0.00454147	0.17757	-0.100876	-0.186569	-0.05081	0.334046	-0.100876	-0.146308	-0.0307355	0.478829	-0.0385917	-0.152692	-0.186096	0.127056	-0.0613562	-0.0781092	-0.331167	-0.26827	-0.303157	-0.229201	0.612781	0.484453	0.677223
		77G7	-0.277857	-0.146313	-0.351542	-0.399998	-0.319292	-0.170494	-0.252874	-0.365986	-0.235394	0.157443	-0.328739	-0.405824	-0.349726	-0.252404	-0.419582	-0.415314	-0.287712	-0.140699	-0.464961	-0.355806	-0.239129	0.0114887	-0.328951	-0.439261	-0.208199	-0.086201	-0.295936	-0.356737	-0.315017	-0.0658816	-0.295936	-0.313575	-0.213745	0.0405489	-0.241731	-0.338721	-0.36126	-0.171088	-0.299912	-0.29686	-0.440297	-0.427117	-0.428137	-0.391851	0.433973	0.34807	0.394727
		TauAB	0.0948222	0.174499	-0.0826196	-0.177738	0.0397696	0.299851	-0.0353005	-0.113549	0.106677	0.355455	-0.170572	-0.182628	-0.0303133	0.0810368	-0.180177	-0.160062	0.018574	0.16249	-0.148976	-0.213626	0.115409	0.362671	-0.113238	-0.220394	0.131118	0.194635	-0.0842434	-0.0671004	0.1159	0.412703	-0.0842436	-0.00679182	0.101576	0.419037	-0.0487545	-0.0762588	-0.0372644	0.177344	-0.0451295	0.062041	-0.228276	-0.228493	-0.229018	-0.109126	0.818566	0.68803	0.771126
	386-406 p1	Tau12	0.610004	0.402977	0.464669	0.898535	0.718618	0.252613	0.718535	0.932874	0.377112	0.0891059	-0.0153465	0.856723	0.554257	0.42389	0.301164	0.850482	0.585028	0.376146	0.233183	0.944586	0.24908	0.0482303	0.142176	0.84728	0.225539	0.0363135	0.122125	0.847167	0.486287	0.271361	0.122125	0.900687	0.22406	-0.0793889	-0.0621495	0.73869	0.732677	0.643148	0.0966293	0.746779	0.839496	0.793053	0.632325	0.785108	0.0117521	0.304595	0.43227
		HT7	0.0027065	0.253335	-0.092526	-0.121124	0.00353561	0.122888	0.00837027	-0.167382	0.00690892	0.596994	-0.131899	-0.0954147	-0.0525749	0.229328	-0.13363	-0.151995	-0.084544	0.260548	0.0420966	0.0430615	0.00490415	0.576424	-0.0848436	-0.121933	-0.0568328	0.216408	-0.0703859	-0.0826923	-0.134714	0.208082	-0.0703861	-0.0950207	-0.0629519	0.449224	-0.0591289	-0.0581594	-0.109903	0.227019	-0.030381	-0.0747504	-0.164687	-0.0243503	-0.132417	-0.146634	0.264594	0.112983	0.306023
		77G7	-0.303117	-0.43962	-0.339085	-0.346326	-0.316858	-0.125228	-0.319282	-0.272247	-0.294816	-0.390502	-0.297987	-0.353549	-0.37643	-0.483731	-0.377307	-0.31834	-0.32462	-0.400769	-0.486337	-0.412113	-0.270232	-0.413629	-0.333773	-0.39068	-0.206725	-0.301647	-0.311445	-0.296281	-0.222843	-0.193532	-0.311445	-0.241378	-0.169289	-0.266241	-0.253893	-0.342341	-0.277534	-0.332171	-0.314494	-0.253657	-0.367181	-0.469302	-0.403682	-0.344677	0.415634	0.376947	0.313983
		TauAB	0.00275098	0.253353	-0.0924716	-0.121098	0.00359048	0.122898	0.00848046	-0.167399	0.00697127	0.596989	-0.131896	-0.0953736	-0.052528	0.229364	-0.133593	-0.151965	-0.0844939	0.260623	0.0421715	0.043096	0.00496658	0.576447	-0.0847933	-0.121896	-0.0567763	0.216473	-0.0703338	-0.082674	-0.134725	0.208019	-0.070334	-0.0950347	-0.0628801	0.449217	-0.0590854	-0.0581241	-0.109858	0.227048	-0.0303404	-0.0747598	-0.16464	-0.0242917	-0.132334	-0.146621	0.264587	0.112951	0.305912
	386-406 p2	Tau12	-0.237032	-0.136526	-0.248112	-0.229423	-0.300438	0.554806	-0.153822	-0.181236	-0.0589487	0.184185	-0.155783	-0.091836	-0.332582	-0.231387	-0.286344	-0.274708	-0.390833	-0.296415	-0.300639	-0.163198	-0.21575	-0.00452387	-0.235959	-0.262259	-0.173889	-0.0601022	-0.219082	-0.192188	-0.177484	0.0371984	-0.219082	-0.142407	-0.23027	0.0982331	-0.189852	-0.278768	-0.199786	-0.14188	-0.16819	-0.183542	-0.2665	-0.265959	-0.32583	-0.256251	0.0731945	-0.167796	0.0073994
		HT7	-0.101522	-0.0117399	-0.122673	-0.200041	-0.145684	-0.0935401	-0.00696732	-0.225734	0.0854686	0.0716802	-0.0574533	-0.177641	-0.131278	-0.123542	-0.156484	-0.236553	-0.110948	-0.134446	-0.0852664	-0.198478	-0.118987	-0.0834164	-0.0754201	-0.210588	-0.0708463	-0.00821393	-0.051753	-0.240345	-0.26967	-0.285373	-0.0517529	-0.250531	-0.192657	-0.0490767	0.000144096	-0.169099	-0.203212	-0.218794	-0.0959573	-0.279732	-0.167819	-0.157606	-0.10719	-0.227894	-0.352492	-0.424596	-0.245323
		77G7	-0.23831	-0.148058	-0.244061	-0.284498	-0.267636	-0.292652	-0.109963	-0.285258	-0.0933801	-0.125242	-0.147321	-0.302475	-0.202776	-0.223858	-0.225754	-0.315006	-0.112894	-0.163947	-0.193843	-0.280761	-0.203908	-0.224688	-0.175351	-0.286096	-0.176824	-0.146643	-0.170062	-0.350624	-0.279798	-0.36072	-0.170062	-0.341654	-0.283692	-0.229008	-0.124324	-0.294272	-0.325153	-0.378599	-0.209601	-0.351006	-0.255813	-0.25618	-0.208399	-0.265227	-0.488701	-0.495654	-0.386774
		TauAB	-0.0343182	0.0431899	-0.00150113	-0.170105	-0.0272027	-0.0252369	0.225538	-0.342836	0.116917	0.205572	-0.0784526	-0.0906928	-0.040547	0.0535864	-0.056707	-0.179143	-0.0447978	0.196675	0.140954	-0.0651982	0.0719451	0.211423	0.0518488	-0.129455	0.0485903	0.238853	0.0727834	-0.194626	-0.301378	-0.308943	0.0727833	-0.315284	0.0680442	0.0886708	0.0884671	-0.0979774	-0.102079	-0.0204506	0.0379889	-0.291199	-0.104068	0.00166856	0.0700589	-0.226343	-0.0833909	-0.282001	-0.43455
	386-406 p3	Tau12
		HT7
		77G7
		TauAB
	407-438 p1	Tau12
		HT7
		77G7
		TauAB
	407-438 p2	Tau12
		HT7
		77G7
		TauAB
	407-438 p3	Tau12
		HT7
		77G7
		TauAB
SI	175-190 p1	HT7	0.0357696	0.164661	-0.0863012	-0.273911	-0.0496313	0.278192	-0.0668587	-0.243663	0.126447	0.430766	-0.113185	-0.248156	-0.0864897	0.0420362	-0.183198	-0.259155	-0.0616081	0.118871	-0.162059	-0.313185	0.106735	0.367189	-0.0683866	-0.306564	0.143962	0.259512	-0.0273967	-0.163395	0.00474843	0.324724	-0.0273969	-0.132717	0.11087	0.448327	0.0321483	-0.132416	-0.10791	0.115404	-0.00378734	-0.0496582	-0.301892	-0.28664	-0.246413	-0.211281	0.802184	0.614868	0.640303
		77G7	0.0701508	0.200284	-0.0792512	-0.199999	-0.00241379	0.311789	0.00408518	-0.165425	0.144733	0.477683	-0.161932	-0.171922	-0.0682237	0.0683563	-0.20371	-0.201086	-0.0397119	0.141029	-0.180326	-0.209089	0.0894157	0.382117	-0.101579	-0.243477	0.123058	0.244119	-0.0605267	-0.0982799	0.00720501	0.332381	-0.0605269	-0.0565243	0.0819087	0.440108	-0.0206316	-0.0837658	-0.064296	0.173923	-0.0383331	-0.0025728	-0.241838	-0.222327	-0.217261	-0.162172	0.784756	0.615422	0.6972
		TauAB	-0.0182718	0.0928238	-0.194644	-0.261135	-0.0726528	0.187915	-0.114262	-0.193305	0.0119711	0.340797	-0.251899	-0.26627	-0.15034	-0.0261807	-0.297458	-0.260638	-0.0988919	0.0508753	-0.274391	-0.265691	-0.0183866	0.280286	-0.218267	-0.3135	0.00679483	0.0996619	-0.183555	-0.165284	-0.0345335	0.285962	-0.183556	-0.0965853	-0.0357182	0.338503	-0.135874	-0.170944	-0.15366	0.0781533	-0.154376	-0.055577	-0.318977	-0.314948	-0.329985	-0.219284	0.724973	0.596543	0.746645
	210-224 p1	HT7	0.112028	-0.0392767	-0.043188	-0.0244048	0.0968719	0.35158	0.415618	-0.0256609	0.23536	-0.0732324	-0.345763	0.0357006	-0.018015	-0.135383	-0.239828	-0.0342579	0.109236	0.0596326	-0.22311	-0.0608618	0.076016	-0.132696	-0.171666	-0.0721025	0.134351	0.0542927	-0.143126	-0.0086749	0.00635364	-0.0948433	-0.143126	0.0146275	0.0827327	-0.103721	-0.169609	-0.0414418	0.079325	-0.00115682	-0.174887	-0.0111099	-0.0142074	-0.0852422	-0.0122534	-0.0370695	0.35806	0.242189	0.159676
		77G7	-0.0173831	-0.00891478	-0.140398	-0.228776	-0.0940818	0.491159	-0.0469116	-0.158431	0.101945	0.172451	-0.187819	-0.163792	-0.158156	-0.12647	-0.246102	-0.221777	-0.127257	-0.0703292	-0.266566	-0.286624	0.0214446	0.10116	-0.1649	-0.277296	0.0806978	0.0960699	-0.13266	-0.131843	0.0361477	0.243387	-0.132661	-0.0694956	0.033599	0.237393	-0.0918222	-0.177683	-0.078441	0.000573195	-0.098502	-0.0356108	-0.260739	-0.308455	-0.27579	-0.182293	0.656754	0.457435	0.501565
		TauAB	-0.14735	-0.061904	-0.322286	-0.320501	-0.177883	0.0909301	-0.222273	-0.236965	-0.154836	0.200768	-0.365989	-0.333211	-0.274481	-0.159488	-0.412758	-0.323788	-0.214246	-0.0681983	-0.405998	-0.29282	-0.157973	0.148661	-0.352392	-0.379581	-0.140915	-0.0567415	-0.322725	-0.233627	-0.13012	0.185664	-0.322725	-0.149721	-0.158898	0.198095	-0.276326	-0.269986	-0.247311	-0.023257	-0.287519	-0.133932	-0.393512	-0.398473	-0.440151	-0.297232	0.677638	0.5683	0.734726
	210-224 p2	HT7	-0.0965583	-0.0196194	-0.232735	-0.343185	-0.162132	0.125973	-0.157242	-0.285289	-0.0295134	0.21895	-0.259434	-0.337386	-0.219882	-0.14355	-0.332018	-0.334604	-0.160099	-0.0415358	-0.345228	-0.374613	-0.0551885	0.140325	-0.23141	-0.391505	-0.00897055	0.0602884	-0.192272	-0.251584	-0.105963	0.163079	-0.192273	-0.195294	-0.0397572	0.231225	-0.130871	-0.245656	-0.215541	-0.0395258	-0.177868	-0.147316	-0.381993	-0.399251	-0.366589	-0.297956	0.711769	0.569742	0.625784
		77G7	-0.252124	-0.169364	-0.356542	-0.472736	-0.321038	0.00575731	-0.262673	-0.425768	-0.129013	0.114447	-0.317467	-0.452986	-0.373144	-0.312196	-0.446928	-0.475927	-0.318524	-0.216097	-0.460058	-0.487712	-0.203966	-0.0230274	-0.323242	-0.522592	-0.139324	-0.0535696	-0.277983	-0.403481	-0.301547	-0.0578947	-0.277983	-0.354476	-0.183633	0.0893882	-0.192344	-0.385939	-0.365051	-0.222166	-0.279715	-0.333127	-0.499927	-0.521701	-0.472419	-0.456792	0.525977	0.362329	0.449844
		TauAB	-0.20079	-0.0560395	-0.347459	-0.432625	-0.261988	0.08188	-0.297158	-0.362213	-0.133769	0.264146	-0.301928	-0.430245	-0.323982	-0.181856	-0.417597	-0.437379	-0.284067	-0.117594	-0.389956	-0.41823	-0.170921	0.175844	-0.321152	-0.483412	-0.139312	-0.0123982	-0.284048	-0.344569	-0.207131	0.142179	-0.284048	-0.275101	-0.186713	0.256203	-0.204183	-0.3458	-0.337022	-0.101906	-0.253319	-0.241773	-0.488699	-0.480233	-0.491727	-0.399536	0.596997	0.435347	0.627896
	210-224 p3	HT7	-0.0225313	0.103528	-0.173483	-0.27159	-0.0758685	0.0952434	-0.0996763	-0.224845	-0.00668504	0.352737	-0.235364	-0.285759	-0.129233	-0.000431719	-0.268423	-0.264699	-0.0659854	0.112397	-0.258653	-0.273831	0.0125982	0.303966	-0.182957	-0.31214	0.0291558	0.136546	-0.149654	-0.179831	-0.0391844	0.271058	-0.149654	-0.129113	0.0107694	0.334167	-0.106215	-0.164124	-0.159724	0.0853895	-0.128414	-0.0652515	-0.319974	-0.302263	-0.301438	-0.216888	0.750729	0.636158	0.693887
		77G7	-0.200551	-0.0688411	-0.271322	-0.279182	-0.228235	-0.183498	-0.271644	-0.21943	-0.248586	0.18564	-0.239728	-0.317486	-0.250117	-0.139821	-0.30634	-0.284889	-0.206612	-0.0726318	-0.379234	-0.243109	-0.183814	0.0904292	-0.261228	-0.315167	-0.174746	-0.0768085	-0.240359	-0.225232	-0.170501	0.102972	-0.240359	-0.167746	-0.156151	0.10774	-0.203135	-0.224583	-0.264277	-0.0519701	-0.226389	-0.141761	-0.33866	-0.323767	-0.362358	-0.254141	0.49248	0.477112	0.535632
		TauAB	0.0343366	0.115679	-0.0652401	0.236059	0.0665478	0.209049	0.064512	0.334928	-0.0660579	0.142242	-0.145028	0.221292	0.0306149	0.104527	-0.0720668	0.172361	0.0563638	0.0303176	-0.104619	0.341873	-0.125415	0.0675664	-0.181005	0.200643	-0.167721	-0.160559	-0.208935	0.201091	0.153541	0.227963	-0.208935	0.301004	-0.228267	-0.0141921	-0.284118	0.0865812	0.0795326	0.140346	-0.163675	0.222612	0.153017	0.165956	-0.0291793	0.224937	-0.260366	-0.160568	0.150326
	212-224 p1	HT7	-0.135432	-0.0776338	-0.271211	-0.380062	-0.184846	0.0842858	-0.217945	-0.327514	-0.090244	0.15983	-0.279612	-0.379171	-0.258633	-0.174913	-0.354649	-0.362631	-0.211518	-0.0732408	-0.336939	-0.400007	-0.0879696	0.13088	-0.259205	-0.424875	-0.0531652	0.0200946	-0.221851	-0.282886	-0.144583	0.132067	-0.221852	-0.232525	-0.0635132	0.217831	-0.151322	-0.282462	-0.249291	-0.0657248	-0.199687	-0.1871	-0.420327	-0.43341	-0.40456	-0.345116	0.723027	0.571446	0.636487
		77G7	-0.0591539	-0.00672784	-0.206836	-0.318893	-0.108936	0.0424716	-0.149958	-0.265178	-0.0333038	0.176901	-0.250202	-0.339735	-0.172674	-0.106779	-0.297667	-0.298083	-0.103969	0.00902019	-0.29185	-0.359986	-0.0211646	0.156963	-0.208126	-0.36283	0.0127268	0.0625016	-0.172311	-0.226027	-0.0717505	0.175045	-0.172312	-0.17515	-0.00400728	0.230803	-0.112264	-0.211504	-0.188858	-0.0121894	-0.159735	-0.118327	-0.355545	-0.372775	-0.334005	-0.268019	0.738942	0.629538	0.670227
		TauAB
	225-240 p1	HT7	-0.0446704	0.0852854	-0.171121	-0.351293	-0.12506	0.21744	-0.156271	-0.310729	0.0417458	0.362314	-0.162622	-0.333538	-0.163989	-0.0315384	-0.251436	-0.335275	-0.133985	0.0484496	-0.220331	-0.383439	0.0335027	0.314489	-0.138175	-0.385611	0.0674784	0.185159	-0.098691	-0.242091	-0.0555694	0.274276	-0.0986911	-0.203431	0.034444	0.400478	-0.0261407	-0.217234	-0.19175	0.0336638	-0.0700178	-0.123521	-0.383686	-0.37104	-0.33495	-0.287746	0.761822	0.570572	0.627754
		77G7	-0.145419	0.0105018	-0.2646	-0.435249	-0.228017	0.177746	-0.204059	-0.401697	-0.0218053	0.351801	-0.231888	-0.401906	-0.270462	-0.124152	-0.349966	-0.433689	-0.240109	-0.0388796	-0.312021	-0.436978	-0.0670765	0.253177	-0.220312	-0.473351	-0.026329	0.12482	-0.176343	-0.33896	-0.186498	0.156261	-0.176343	-0.300879	-0.0704543	0.337831	-0.0937617	-0.312622	-0.292282	-0.0599602	-0.153472	-0.240046	-0.467469	-0.447131	-0.416772	-0.392685	0.666217	0.447415	0.540801
		TauAB	-0.206086	-0.034968	-0.346732	-0.449979	-0.272551	0.120304	-0.291506	-0.391853	-0.115758	0.322671	-0.289744	-0.433127	-0.332247	-0.165001	-0.416785	-0.458912	-0.30507	-0.107333	-0.368381	-0.42173	-0.166829	0.223351	-0.309902	-0.497104	-0.137135	0.0206873	-0.270798	-0.36125	-0.231691	0.140678	-0.270798	-0.300367	-0.18956	0.298608	-0.186733	-0.356282	-0.34937	-0.0955174	-0.23764	-0.26538	-0.503011	-0.47971	-0.493638	-0.421977	0.578495	0.386073	0.590675
	225-240 p2	HT7	-0.109808	0.0515978	-0.247923	-0.392559	-0.182603	0.168521	-0.208068	-0.344881	-0.0312178	0.370631	-0.225748	-0.379442	-0.228114	-0.0676608	-0.322954	-0.387983	-0.193477	0.0118922	-0.280635	-0.391191	-0.0451487	0.307001	-0.214616	-0.431154	-0.0198442	0.12514	-0.176743	-0.291962	-0.121819	0.23839	-0.176744	-0.242869	-0.0591513	0.374057	-0.102567	-0.274924	-0.260766	-0.00589748	-0.143698	-0.176772	-0.436797	-0.41209	-0.404499	-0.338772	0.694551	0.505513	0.624206
		77G7	-0.149875	0.0221691	-0.284911	-0.432693	-0.226561	0.181425	-0.228885	-0.385669	-0.0522013	0.36443	-0.24989	-0.410188	-0.268744	-0.101971	-0.358502	-0.432023	-0.232015	-0.0172731	-0.312676	-0.423243	-0.0748791	0.289285	-0.243977	-0.471277	-0.0479875	0.108791	-0.205595	-0.334789	-0.157485	0.208513	-0.205596	-0.284957	-0.0924668	0.357778	-0.127274	-0.320207	-0.300754	-0.0460417	-0.171034	-0.220104	-0.476099	-0.449211	-0.441667	-0.379044	0.66223	0.453441	0.577767
		TauAB	-0.154964	0.00303615	-0.300328	-0.411649	-0.2185	0.122837	-0.269874	-0.34927	-0.0948081	0.320725	-0.258162	-0.408936	-0.272165	-0.110947	-0.363532	-0.409791	-0.238326	-0.0449222	-0.320101	-0.400556	-0.10717	0.262559	-0.267618	-0.454819	-0.0855878	0.0533939	-0.232538	-0.315002	-0.15218	0.213469	-0.232539	-0.253786	-0.126305	0.331477	-0.154871	-0.310103	-0.300269	-0.0455661	-0.19489	-0.201235	-0.465176	-0.44463	-0.454468	-0.364739	0.645266	0.472677	0.641435
	225-240p3	HT7	-0.0768202	0.118997	-0.214572	-0.33926	-0.154272	0.240761	-0.163685	-0.289487	0.00290761	0.464268	-0.204331	-0.316395	-0.192864	-0.00680011	-0.293422	-0.345738	-0.164483	0.0578384	-0.258921	-0.320754	-0.022716	0.372315	-0.192549	-0.377911	-0.00277719	0.16318	-0.157183	-0.241809	-0.0823973	0.301629	-0.157183	-0.188303	-0.0502951	0.423333	-0.0968183	-0.231823	-0.222472	0.0535444	-0.118542	-0.124616	-0.390666	-0.352988	-0.369998	-0.284461	0.673069	0.483657	0.621337
		77G7	-0.129589	0.0441893	-0.267712	-0.404203	-0.207067	0.211433	-0.219099	-0.348679	-0.0422366	0.377737	-0.237259	-0.383615	-0.24624	-0.0782044	-0.339005	-0.403993	-0.209047	-0.000422883	-0.302585	-0.397586	-0.0591312	0.305059	-0.23341	-0.443589	-0.0346758	0.115506	-0.197656	-0.304595	-0.116875	0.252755	-0.197656	-0.248424	-0.0802551	0.372758	-0.125431	-0.297449	-0.275949	-0.0206609	-0.158506	-0.181709	-0.452131	-0.427001	-0.428071	-0.343769	0.67097	0.471315	0.599368
		TauAB	-0.0843334	0.0763015	-0.250166	-0.311586	-0.138227	0.141485	-0.221508	-0.230488	-0.0735394	0.353728	-0.242962	-0.328476	-0.192045	-0.0270946	-0.31127	-0.312647	-0.147553	0.0301581	-0.282058	-0.298248	-0.0660462	0.312144	-0.245938	-0.357473	-0.0584477	0.0620675	-0.219136	-0.217593	-0.0473898	0.316982	-0.219136	-0.14026	-0.100527	0.35698	-0.163716	-0.22798	-0.224234	0.0403371	-0.174085	-0.0884663	-0.379179	-0.358242	-0.398919	-0.252946	0.648014	0.524847	0.716285
	386-406 p1	HT7	-0.182259	0.0741082	-0.298035	-0.294196	-0.212827	0.0861965	-0.261122	-0.250448	-0.171022	0.483396	-0.236836	-0.283227	-0.268352	-0.00949758	-0.331204	-0.329268	-0.285896	-0.0141399	-0.25927	-0.168166	-0.193534	0.377508	-0.278	-0.328874	-0.214455	0.0186935	-0.256121	-0.232786	-0.214701	0.210056	-0.256122	-0.177035	-0.246254	0.356431	-0.209572	-0.245588	-0.289271	0.0429572	-0.204801	-0.17128	-0.371879	-0.286953	-0.404023	-0.300245	0.372001	0.233392	0.528255
		77G7	-0.317283	-0.0843783	-0.444328	-0.494309	-0.360062	0.0280263	-0.308229	-0.476848	-0.201231	0.384524	-0.377674	-0.454165	-0.443243	-0.214183	-0.519292	-0.534991	-0.440015	-0.165069	-0.409795	-0.366865	-0.309612	0.223641	-0.403162	-0.539014	-0.295825	-0.0450319	-0.361521	-0.439845	-0.449569	-0.0507514	-0.361522	-0.398813	-0.35226	0.238714	-0.278415	-0.428271	-0.454227	-0.152095	-0.336359	-0.412423	-0.549789	-0.478608	-0.538833	-0.532285	0.340835	0.119255	0.419744
		TauAB	-0.163956	0.121702	-0.274601	-0.34393	-0.221662	0.113609	-0.23407	-0.31645	-0.0830566	0.554221	-0.193997	-0.318779	-0.259384	0.00230868	-0.31999	-0.380623	-0.277528	-0.00260681	-0.232546	-0.240412	-0.153793	0.409858	-0.230442	-0.375932	-0.155599	0.0972187	-0.198843	-0.281441	-0.242822	0.185007	-0.198843	-0.239374	-0.218628	0.411455	-0.134091	-0.260538	-0.308641	0.0214443	-0.160485	-0.219521	-0.40329	-0.314522	-0.394083	-0.342356	0.357059	0.178213	0.471563
	386-406 p2	HT7	-0.210751	0.038677	-0.328837	-0.394846	-0.274104	0.077949	-0.263594	-0.352007	-0.123185	0.463552	-0.261082	-0.372724	-0.319164	-0.0986184	-0.393182	-0.428348	-0.312249	-0.0735314	-0.347112	-0.312977	-0.19798	0.296235	-0.293434	-0.437827	-0.180445	0.0387176	-0.256653	-0.328548	-0.276812	0.130855	-0.256654	-0.274035	-0.240673	0.326848	-0.186978	-0.314069	-0.348361	-0.0468244	-0.227344	-0.25777	-0.455229	-0.394784	-0.452839	-0.390145	0.43263	0.260484	0.517723
		77G7	-0.234312	-0.038346	-0.378164	-0.458716	-0.293262	0.10066	-0.259562	-0.419007	-0.130311	0.368217	-0.345505	-0.429929	-0.365454	-0.175438	-0.465619	-0.482341	-0.335974	-0.102084	-0.398756	-0.389677	-0.207997	0.233863	-0.350526	-0.507137	-0.182851	0.013157	-0.308778	-0.383339	-0.309529	0.0720883	-0.308778	-0.329749	-0.237548	0.278174	-0.231198	-0.375284	-0.377801	-0.100316	-0.28195	-0.312211	-0.513008	-0.470787	-0.501006	-0.455024	0.520822	0.314411	0.538474
		TauAB	-0.295341	-0.11152	-0.424101	-0.487768	-0.351682	0.0226594	-0.373902	-0.422431	-0.222881	0.277185	-0.338791	-0.47767	-0.412378	-0.237462	-0.481403	-0.505109	-0.387053	-0.186629	-0.449719	-0.432632	-0.267314	0.154466	-0.383057	-0.538076	-0.241045	-0.0714547	-0.345974	-0.410259	-0.314521	0.0686268	-0.345974	-0.341705	-0.284916	0.221703	-0.260196	-0.414003	-0.421698	-0.159495	-0.31319	-0.325017	-0.550385	-0.52413	-0.559914	-0.475339	0.505036	0.333203	0.566766
	386-406 p3	HT7	-0.154368	0.0546631	-0.257188	-0.258467	-0.183115	-0.0693715	-0.260029	-0.200187	-0.200723	0.379886	-0.219806	-0.288187	-0.216741	-0.0194895	-0.288451	-0.275819	-0.19846	0.0131031	-0.295687	-0.181193	-0.15465	0.291625	-0.246604	-0.293445	-0.167949	-0.00104456	-0.227086	-0.195235	-0.14297	0.226541	-0.227086	-0.133958	-0.170692	0.278511	-0.189918	-0.19756	-0.25009	0.0474401	-0.191505	-0.106627	-0.333348	-0.278138	-0.36412	-0.236195	0.487724	0.433551	0.608451
		77G7	-0.198118	0.0224808	-0.264102	-0.237295	-0.249512	0.412446	-0.208874	-0.185347	-0.0986838	0.429027	-0.171774	-0.150502	-0.290853	-0.0694102	-0.29199	-0.287266	-0.348274	-0.136552	-0.250507	-0.119348	-0.201582	0.267488	-0.248094	-0.270727	-0.199811	0.00516482	-0.231601	-0.185745	-0.171867	0.194947	-0.231601	-0.126556	-0.255226	0.300176	-0.19804	-0.246848	-0.232113	-0.00540145	-0.166334	-0.147692	-0.304798	-0.245176	-0.365061	-0.254529	0.189892	-0.0181194	0.273961
		TauAB	-0.191705	-0.174849	-0.137458	-0.196436	-0.2359	0.230098	-0.181607	-0.136881	-0.137103	-0.219584	0.00296968	-0.167266	-0.113978	-0.134392	-0.0335741	-0.17862	-0.0610399	-0.0917807	-0.0965362	-0.251131	-0.0172525	-0.128089	-0.0594305	-0.171289	-0.0305932	-0.077162	-0.0897694	-0.193948	0.143352	0.102979	-0.0897694	-0.160374	-0.0414428	-0.0936769	-0.0828309	-0.251406	-0.155037	-0.253012	-0.0379662	-0.0758335	-0.187392	-0.217857	-0.191923	-0.0601277	-0.170325	-0.243178	-0.385665
	407-438 p1	HT7	0.00720001	0.232864	-0.141166	-0.168548	-0.0238518	0.130949	-0.137047	-0.120112	-0.0301424	0.533974	-0.149694	-0.189379	-0.0731522	0.164738	-0.183153	-0.181683	-0.0674587	0.182033	-0.109242	-0.0951127	-0.00220753	0.506945	-0.144579	-0.198121	-0.0332754	0.151619	-0.127	-0.0890306	-0.000516258	0.398078	-0.127001	-0.0343803	-0.0602761	0.473651	-0.0974418	-0.0890644	-0.127656	0.204486	-0.0744267	0.0110725	-0.242093	-0.165341	-0.2617	-0.132	0.543218	0.447851	0.677823
		77G7
		TauAB	-0.317577	-0.0980153	-0.438305	-0.420023	-0.335552	-0.120703	-0.419004	-0.362091	-0.317181	0.303335	-0.329897	-0.43478	-0.409287	-0.184838	-0.461026	-0.450186	-0.415332	-0.182632	-0.393265	-0.299831	-0.341074	0.199968	-0.40152	-0.464727	-0.349624	-0.141926	-0.374921	-0.364401	-0.364143	0.0421353	-0.374921	-0.298547	-0.377423	0.208037	-0.300684	-0.374197	-0.428363	-0.119309	-0.334967	-0.314197	-0.499658	-0.437885	-0.540058	-0.445062	0.32851	0.214387	0.551934
	407-438 p2	HT7	0.0741289	0.240605	-0.0959647	-0.163067	0.0356272	0.149614	-0.0813629	-0.109594	0.0332545	0.475261	-0.155778	-0.194955	-0.0195812	0.167134	-0.163085	-0.156627	0.0175282	0.231419	-0.108398	-0.143027	0.0823059	0.483888	-0.113126	-0.196417	0.065009	0.196062	-0.090975	-0.0661209	0.0783664	0.43811	-0.0909752	-0.010764	0.0454037	0.474862	-0.0611044	-0.0593326	-0.0738463	0.226486	-0.0466429	0.0587513	-0.227389	-0.179771	-0.230317	-0.10116	0.724736	0.634662	0.776299
		77G7
		TauAB	-0.218072	-0.111491	-0.337841	-0.186083	-0.172497	-0.201547	-0.265188	-0.092958	-0.386645	-0.0780807	-0.318637	-0.279857	-0.164812	-0.0472707	-0.262926	-0.192036	-0.0524473	0.0510917	-0.224099	-0.0969057	-0.199107	0.0769057	-0.342617	-0.194071	-0.289995	-0.248789	-0.377556	-0.190382	0.0219097	0.156391	-0.377556	-0.103378	-0.283884	-0.0506896	-0.390261	-0.260771	-0.263335	-0.114112	-0.313641	-0.0690177	-0.259135	-0.224014	-0.352492	-0.0985497	-0.0491163	0.0200445	0.174281
	407-438 p3	HT7
		77G7
		TauAB
			Tau12	HT7	77G7	TauAB	Tau12	HT7	77G7	TauAB	Tau12	HT7	77G7	TauAB	Tau12	HT7	77G7	TauAB	Tau12	HT7	77G7	TauAB	Tau12	HT7	77G7	TauAB	Tau12	HT7	77G7	TauAB	Tau12	HT7	77G7	TauAB	Tau12	HT7	77G7	TauAB	Tau12	HT7	77G7	TauAB	Tau12	HT7	77G7	TauAB	HT7	77G7	TauAB
			6-23				25-44				45-68 0N				68-97 1N				68-87 2N				212-221				243-254				275-286 3R				299-317 4R				354-369				407-438				6-23
			TBS																																												SI
[truncated: 33 more columns]
