# Supplementary material for: Tau protein profiling in tauopathies: a human brain study
Source: Mol Neurodegener. 2024 Jul 19;19:54. doi: 10.1186/s13024-024-00741-9 (PMC11264707; doi:10.1186/s13024-024-00741-9)
Supplement: Supplementary file 4 — Supplementary Material 4: Figure 19 [file 13024_2024_741_MOESM4_ESM.xlsx]

## Sheet: a) Ctrl
a)		TBS											SI
	#1 Ctrl	6-23	25-44	45-68 0N	68-97 1N	68-87 2N	212-221	243-254	275-286 3R	299-317 4R	354-369	407-438	6-23	25-44	45-68 0N	68-97 1N	68-87 2N	212-221	243-254	275-286 3R	299-317 4R	354-369	407-438
TBS	6-23	1	0.637936	0.80623	0.861267	0.729026	0.502893	0.967002	0.678198	0.670374	0.654832	0.639193	0.901439	0.686598	0.521521	0.762987	0.345135	0.039492	0.770553	0.478759	0.576337	0.447904	0.407012
	25-44	0.637936	1	0.688524	0.83445	0.838719	0.804432	0.663984	0.270441	0.0455036	0.111558	0.079137	0.412557	0.689591	0.676955	0.691374	0.482103	0.523763	0.604035	0.108252	0.0242016	0.0485278	-0.222215
	45-68 0N	0.80623	0.688524	1	0.783274	0.458018	0.758355	0.846107	0.40081	0.360685	0.375241	0.319869	0.668157	0.684393	0.809345	0.575174	0.0560656	0.385951	0.794912	0.17616	0.268027	0.191339	0.103525
	68-97 1N	0.861267	0.83445	0.783274	1	0.839048	0.810913	0.849808	0.444876	0.329897	0.333293	0.319585	0.687565	0.874313	0.631052	0.782114	0.439425	0.384937	0.785207	0.207574	0.284886	0.171657	0.114857
	68-87 2N	0.729026	0.838719	0.458018	0.839048	1	0.53383	0.696319	0.466203	0.335169	0.336015	0.337019	0.57998	0.707286	0.390596	0.808218	0.73906	0.203904	0.606288	0.355257	0.312619	0.314135	0.112602
	212-221	0.502893	0.804432	0.758355	0.810913	0.53383	1	0.573342	0.102744	-0.0795689	-0.0708843	-0.10294	0.354274	0.750517	0.830472	0.572243	0.233871	0.800075	0.695305	-0.110409	-0.0828675	-0.141819	-0.226967
	243-254	0.967002	0.663984	0.846107	0.849808	0.696319	0.573342	1	0.743967	0.66924	0.687369	0.669691	0.92456	0.692956	0.664995	0.791734	0.395987	0.165158	0.845453	0.564864	0.625531	0.536455	0.434152
	275-286 3R	0.678198	0.270441	0.40081	0.444876	0.466203	0.102744	0.743967	1	0.878063	0.948077	0.94581	0.772602	0.451717	0.289021	0.507538	0.311947	-0.140506	0.522499	0.945687	0.931567	0.863561	0.784734
	299-317 4R	0.670374	0.0455036	0.360685	0.329897	0.335169	-0.0795689	0.66924	0.878063	1	0.929355	0.923171	0.803203	0.387895	0.149222	0.433644	0.223015	-0.334376	0.547256	0.860999	0.935288	0.871436	0.911902
	354-369	0.654832	0.111558	0.375241	0.333293	0.336015	-0.0708843	0.687369	0.948077	0.929355	1	0.993904	0.726653	0.382912	0.129732	0.339195	0.16577	-0.389105	0.444591	0.902192	0.923501	0.873549	0.854857
	407-438	0.639193	0.079137	0.319869	0.319585	0.337019	-0.10294	0.669691	0.94581	0.923171	0.993904	1	0.728095	0.353757	0.0825317	0.334238	0.199378	-0.418705	0.421588	0.907104	0.919704	0.867489	0.875291
SI	6-23	0.901439	0.412557	0.668157	0.687565	0.57998	0.354274	0.92456	0.772602	0.803203	0.726653	0.728095	1	0.519177	0.547202	0.805965	0.456131	0.0584199	0.821902	0.665582	0.758182	0.655142	0.616224
	25-44	0.686598	0.689591	0.684393	0.874313	0.707286	0.750517	0.692956	0.451717	0.387895	0.382912	0.353757	0.519177	1	0.529818	0.552799	0.306051	0.338427	0.757907	0.251792	0.327934	0.271128	0.278716
	45-68 0N	0.521521	0.676955	0.809345	0.631052	0.390596	0.830472	0.664995	0.289021	0.149222	0.129732	0.0825317	0.547202	0.529818	1	0.675631	0.308388	0.776027	0.808385	0.175984	0.186448	0.195961	-0.0433949
	68-97 1N	0.762987	0.691374	0.575174	0.782114	0.808218	0.572243	0.791734	0.507538	0.433644	0.339195	0.334238	0.805965	0.552799	0.675631	1	0.755648	0.425206	0.797063	0.423191	0.471844	0.419566	0.183441
	68-87 2N	0.345135	0.482103	0.0560656	0.439425	0.73906	0.233871	0.395987	0.311947	0.223015	0.16577	0.199378	0.456131	0.306051	0.308388	0.755648	1	0.217238	0.505085	0.394455	0.299071	0.438174	0.151299
	212-221	0.039492	0.523763	0.385951	0.384937	0.203904	0.800075	0.165158	-0.140506	-0.334376	-0.389105	-0.418705	0.0584199	0.338427	0.776027	0.425206	0.217238	1	0.436146	-0.211948	-0.233545	-0.243936	-0.409744
	243-254	0.770553	0.604035	0.794912	0.785207	0.606288	0.695305	0.845453	0.522499	0.547256	0.444591	0.421588	0.821902	0.757907	0.808385	0.797063	0.505085	0.436146	1	0.414026	0.485958	0.48889	0.396271
	275-286 3R	0.478759	0.108252	0.17616	0.207574	0.355257	-0.110409	0.564864	0.945687	0.860999	0.902192	0.907104	0.665582	0.251792	0.175984	0.423191	0.394455	-0.211948	0.414026	1	0.931162	0.949907	0.81946
	299-317 4R	0.576337	0.0242016	0.268027	0.284886	0.312619	-0.0828675	0.625531	0.931567	0.935288	0.923501	0.919704	0.758182	0.327934	0.186448	0.471844	0.299071	-0.233545	0.485958	0.931162	1	0.924318	0.868398
	354-369	0.447904	0.0485278	0.191339	0.171657	0.314135	-0.141819	0.536455	0.863561	0.871436	0.873549	0.867489	0.655142	0.271128	0.195961	0.419566	0.438174	-0.243936	0.48889	0.949907	0.924318	1	0.83697
	407-438	0.407012	-0.222215	0.103525	0.114857	0.112602	-0.226967	0.434152	0.784734	0.911902	0.854857	0.875291	0.616224	0.278716	-0.0433949	0.183441	0.151299	-0.409744	0.396271	0.81946	0.868398	0.83697	1
TBS	6-23	1	0.866864	0.837848	0.951197	0.888698	0.885378	0.97339	0.930971	0.932799	0.865626	0.852261	0.146857	0.260015	0.142136	0.275306	0.366502	0.275339	-0.0374774	-0.0492194	0.0364809	-0.224674	0.359105
	25-44	0.866864	1	0.894647	0.882404	0.868785	0.927623	0.87335	0.674712	0.702606	0.552049	0.55303	0.0998335	0.1215	0.150797	0.325536	0.375162	0.301101	-0.117418	-0.135972	-0.0287144	-0.309397	0.280137
	45-68 0N	0.837848	0.894647	1	0.775239	0.722547	0.91192	0.877364	0.7178	0.801228	0.707645	0.71163	0.108401	0.0314205	0.178727	0.323513	0.315693	0.340844	-0.140004	-0.139438	-0.0938852	-0.387194	0.379326
	68-97 1N	0.951197	0.882404	0.775239	1	0.923126	0.876166	0.922615	0.87351	0.857189	0.734899	0.746368	0.00217016	0.142915	0.00698399	0.179123	0.288846	0.17659	-0.182446	-0.190234	-0.0755982	-0.328136	0.21916
	68-87 2N	0.888698	0.868785	0.722547	0.923126	1	0.880036	0.894478	0.728901	0.753951	0.611486	0.625538	0.0889522	0.234944	0.0702888	0.205144	0.398022	0.184957	-0.0646694	-0.0949111	-0.0130886	-0.1973	0.16886
	212-221	0.885378	0.927623	0.91192	0.876166	0.880036	1	0.893254	0.754215	0.799399	0.638209	0.632777	-0.0164657	0.0602387	0.0246037	0.190761	0.290671	0.212119	-0.245937	-0.258108	-0.190137	-0.442384	0.214166
	243-254	0.97339	0.87335	0.877364	0.922615	0.894478	0.893254	1	0.898791	0.934321	0.851038	0.85982	0.0744254	0.131418	0.0769533	0.204064	0.295824	0.20135	-0.105338	-0.127122	-0.0675906	-0.285246	0.274099
	275-286 3R	0.930971	0.674712	0.7178	0.87351	0.728901	0.754215	0.898791	1	0.976494	0.931184	0.926602	-0.037967	0.104752	-0.0595127	0.0446083	0.113191	0.0659127	-0.170981	-0.174345	-0.109342	-0.291701	0.215923
	299-317 4R	0.932799	0.702606	0.801228	0.857189	0.753951	0.799399	0.934321	0.976494	1	0.950599	0.959671	0.00545675	0.0917293	-0.00977808	0.079481	0.154054	0.101549	-0.138483	-0.142886	-0.105242	-0.280329	0.240709
	354-369	0.865626	0.552049	0.707645	0.734899	0.611486	0.638209	0.851038	0.931184	0.950599	1	0.98787	0.178006	0.23227	0.153334	0.212131	0.249052	0.241385	0.038914	0.0456175	0.068263	-0.139278	0.42058
	407-438	0.852261	0.55303	0.71163	0.746368	0.625538	0.632777	0.85982	0.926602	0.959671	0.98787	1	0.118706	0.154033	0.0925759	0.145868	0.189634	0.167913	-0.00385099	0.000620363	0.017045	-0.154034	0.340682
SI	6-23	0.146857	0.0998335	0.108401	0.00217016	0.0889522	-0.0164657	0.0744254	-0.037967	0.00545675	0.178006	0.118706	1	0.913906	0.983623	0.911576	0.902206	0.86742	0.933542	0.940807	0.936073	0.702695	0.852334
	25-44	0.260015	0.1215	0.0314205	0.142915	0.234944	0.0602387	0.131418	0.104752	0.0917293	0.23227	0.154033	0.913906	1	0.855493	0.795806	0.876517	0.756672	0.874744	0.876553	0.903732	0.695238	0.75268
	45-68 0N	0.142136	0.150797	0.178727	0.00698399	0.0702888	0.0246037	0.0769533	-0.0595127	-0.00977808	0.153334	0.0925759	0.983623	0.855493	1	0.960148	0.913702	0.927967	0.869033	0.882281	0.881974	0.59379	0.898299
	68-97 1N	0.275306	0.325536	0.323513	0.179123	0.205144	0.190761	0.204064	0.0446083	0.079481	0.212131	0.145868	0.911576	0.795806	0.960148	1	0.94535	0.986342	0.714651	0.733961	0.76923	0.37928	0.94396
	68-87 2N	0.366502	0.375162	0.315693	0.288846	0.398022	0.290671	0.295824	0.113191	0.154054	0.249052	0.189634	0.902206	0.876517	0.913702	0.94535	1	0.927163	0.726708	0.732141	0.763033	0.418899	0.863927
	212-221	0.275339	0.301101	0.340844	0.17659	0.184957	0.212119	0.20135	0.0659127	0.101549	0.241385	0.167913	0.86742	0.756672	0.927967	0.986342	0.927163	1	0.637336	0.665458	0.69275	0.271855	0.966196
	243-254	-0.0374774	-0.117418	-0.140004	-0.182446	-0.0646694	-0.245937	-0.105338	-0.170981	-0.138483	0.038914	-0.00385099	0.933542	0.874744	0.869033	0.714651	0.726708	0.637336	1	0.99517	0.97142	0.908733	0.632774
	275-286 3R	-0.0492194	-0.135972	-0.139438	-0.190234	-0.0949111	-0.258108	-0.127122	-0.174345	-0.142886	0.0456175	0.000620363	0.940807	0.876553	0.882281	0.733961	0.732141	0.665458	0.99517	1	0.979471	0.893639	0.667886
	299-317 4R	0.0364809	-0.0287144	-0.0938852	-0.0755982	-0.0130886	-0.190137	-0.0675906	-0.109342	-0.105242	0.068263	0.017045	0.936073	0.903732	0.881974	0.76923	0.763033	0.69275	0.97142	0.979471	1	0.866196	0.693218
	354-369	-0.224674	-0.309397	-0.387194	-0.328136	-0.1973	-0.442384	-0.285246	-0.291701	-0.280329	-0.139278	-0.154034	0.702695	0.695238	0.59379	0.37928	0.418899	0.271855	0.908733	0.893639	0.866196	1	0.272661
	407-438	0.359105	0.280137	0.379326	0.21916	0.16886	0.214166	0.274099	0.215923	0.240709	0.42058	0.340682	0.852334	0.75268	0.898299	0.94396	0.863927	0.966196	0.632774	0.667886	0.693218	0.272661	1
	#2 Ctrl	6-23	25-44	45-68 0N	68-97 1N	68-87 2N	212-221	243-254	275-286 3R	299-317 4R	354-369	407-438	6-23	25-44	45-68 0N	68-97 1N	68-87 2N	212-221	243-254	275-286 3R	299-317 4R	354-369	407-438
		TBS											SI
		TBS											SI														TBS														SI
	#1 Ctrl	6-23	25-44	45-68 0N	68-97 1N	68-87 2N	212-221	243-254	275-286 3R	299-317 4R	354-369	407-438	6-23	25-44	45-68 0N	68-97 1N	68-87 2N	212-221	243-254	275-286 3R	299-317 4R	354-369	407-438			#1 Ctrl	175-190 p1	210-224 p1	210-224 p2	210-224 p3	212-224 p1	225-240 p1	225-240 p2	225-240p3	386-406 p1	386-406 p2	386-406 p3	407-438 p1	407-438 p2	407-438 p3	175-190 p1	210-224 p1	210-224 p2	210-224 p3	212-224 p1	225-240 p1	225-240 p2	225-240p3	386-406 p1
TBS	175-190 p1	0.613652	0.546534	0.740365	0.488537	0.41935	0.525889	0.657997	0.527615	0.609321	0.687974	0.674811	0.462989	0.282894	0.539953	0.638611	0.564603	0.674875	0.195841	0.204658	0.194301	-0.170447	0.732226		TBS	175-190 p1	1	0.682777	0.682992		0.739761	0.934022	0.77357	-0.320131	0.289128	0.206928					0.920967	0.401707	-0.287207		0.36798	0.907408	0.817374	0.430059	-0.384827
	210-224 p1	0.600657	0.533802	0.62511	0.519607	0.632023	0.654725	0.683727	0.545218	0.644641	0.566229	0.585962	-0.172767	-0.137285	-0.213446	-0.183155	-0.0485493	-0.181459	-0.215748	-0.236264	-0.244537	-0.219674	-0.110757			210-224 p1	0.682777	1	0.748722		0.991806	0.673326	0.929605	-0.174061	0.205733	0.195085					0.77059	0.401503	-0.147644		0.566059	0.673054	0.589576	0.0185067	-0.258344
	210-224 p2	0.385151	0.253427	0.0537482	0.47629	0.472492	0.265879	0.36949	0.478472	0.421784	0.251674	0.318252	-0.261191	-0.023199	-0.359767	-0.39416	-0.21298	-0.46334	-0.114861	-0.16147	-0.119196	0.0909932	-0.440292			210-224 p2	0.682992	0.748722	1		0.778525	0.778284	0.835228	-0.0720814	0.291332	0.128218					0.737493	0.114416	-0.000743292		0.619874	0.830152	0.878962	0.405648	-0.271957
	210-224 p3																									210-224 p3
	212-224 p1	0.37962	0.455411	0.490637	0.350305	0.407902	0.371187	0.522739	0.279977	0.362993	0.315927	0.36754	0.146973	-0.0332852	0.205465	0.270475	0.268105	0.251018	0.0052163	-0.0433025	-0.0824771	-0.19749	0.205855			212-224 p1	0.739761	0.991806	0.778525		1	0.741069	0.938911	-0.172794	0.213329	0.220498					0.80988	0.353759	-0.195475		0.562778	0.723004	0.65549	0.104132	-0.315218
	225-240 p1	0.840667	0.789246	0.797017	0.756584	0.767	0.739957	0.844268	0.663073	0.712474	0.726694	0.701787	0.512049	0.479927	0.545643	0.67075	0.716588	0.67079	0.260498	0.249547	0.29885	-0.0698649	0.692056			225-240 p1	0.934022	0.673326	0.778284		0.741069	1	0.828028	-0.216862	0.430152	0.249114					0.835417	0.197546	-0.182159		0.393136	0.95216	0.877769	0.448622	-0.246336
	225-240 p2	0.346666	0.121187	0.125564	0.269079	0.25651	0.094559	0.400455	0.435433	0.425672	0.449564	0.481637	0.16601	0.17653	0.121704	0.0730676	0.123323	0.0382666	0.192367	0.139004	0.0935689	0.13689	0.102329			225-240 p2	0.77357	0.929605	0.835228		0.938911	0.828028	1	-0.176955	0.4342	0.163276					0.81858	0.394432	-0.137093		0.523361	0.863153	0.744636	0.0776783	-0.138314
	225-240p3	-0.0328311	-0.355956	-0.326646	-0.224217	-0.317041	-0.403793	-0.111809	0.128784	0.0316386	0.235425	0.167387	0.316069	0.383844	0.228999	0.0874502	0.0190965	0.0525428	0.464763	0.449544	0.43123	0.512197	0.214479			225-240p3	-0.320131	-0.174061	-0.0720814		-0.172794	-0.216862	-0.176955	1	-0.018712	0.0479601					-0.483504	0.0718774	0.334521		-0.31078	-0.303239	-0.21012	-0.238667	0.128624
	386-406 p1	0.0926986	-0.142961	-0.0153624	-0.0907217	-0.218137	-0.0596279	-0.0227931	0.166253	0.0819946	0.283413	0.147175	0.30544	0.365789	0.327207	0.360551	0.255268	0.444115	0.17712	0.206398	0.209938	-0.0402781	0.563234			386-406 p1	0.289128	0.205733	0.291332		0.213329	0.430152	0.4342	-0.018712	1	0.610253					0.149115	0.0508476	-0.091503		-0.156266	0.468302	0.157092	-0.383595	0.218218
	386-406 p2	0.506005	0.442426	0.566332	0.418236	0.518436	0.615847	0.560714	0.471435	0.565949	0.488013	0.490406	-0.209567	-0.151501	-0.245109	-0.222884	-0.0991766	-0.200563	-0.250389	-0.256828	-0.27016	-0.241904	-0.128056			386-406 p2	0.206928	0.195085	0.128218		0.220498	0.249114	0.163276	0.0479601	0.610253	1					0.0302221	-0.199916	-0.247857		-0.140459	0.114081	-0.0902415	-0.276334	-0.279653
	386-406 p3																									386-406 p3
	407-438 p1	0.708365	0.398705	0.591772	0.642274	0.48603	0.52289	0.699193	0.827274	0.856461	0.879525	0.90219	0.141917	0.172084	0.137878	0.187516	0.221137	0.237574	-0.002532	0.0152905	0.00721728	-0.185313	0.381003			407-438 p1
	407-438 p2																									407-438 p2
	407-438 p3																									407-438 p3
SI	175-190 p1	-0.0592487	-0.112089	-0.12379	-0.221392	-0.107926	-0.259423	-0.112952	-0.205496	-0.174735	0.0177752	-0.0356537	0.944994	0.847846	0.902367	0.765909	0.743951	0.695397	0.979984	0.97112	0.942646	0.844852	0.684297		SI	175-190 p1	0.920967	0.77059	0.737493		0.80988	0.835417	0.81858	-0.483504	0.149115	0.0302221					1	0.40377	-0.408769		0.581733	0.884372	0.843108	0.416848	-0.473244
	210-224 p1	-0.228441	0.0992015	0.163236	-0.305272	-0.282173	-0.091479	-0.112696	-0.326669	-0.249723	-0.278991	-0.255939	0.0576116	-0.25781	0.140693	0.0975979	-0.10098	0.0295552	0.0739482	0.0432277	0.00561613	0.0612597	-0.0287439			210-224 p1	0.401707	0.401503	0.114416		0.353759	0.197546	0.394432	0.0718774	0.0508476	-0.199916					0.40377	1	-0.137867		0.17547	0.298215	0.141078	-0.323596	-0.084318
	210-224 p2	-0.409452	-0.430501	-0.54718	-0.468103	-0.276409	-0.522138	-0.411304	-0.425459	-0.411373	-0.368426	-0.347731	0.316935	0.339476	0.192018	-0.0541119	0.0290143	-0.173664	0.623635	0.580666	0.521923	0.869826	-0.20693			210-224 p2	-0.287207	-0.147644	-0.000743292		-0.195475	-0.182159	-0.137093	0.334521	-0.091503	-0.247857					-0.408769	-0.137867	1		-0.287686	-0.202016	-0.144509	0.0537478	0.760012
	210-224 p3	-0.288096	-0.248009	-0.519524	-0.271811	-0.0290441	-0.350983	-0.30545	-0.380491	-0.400847	-0.431781	-0.418491	0.272564	0.394489	0.154405	-0.0171359	0.146693	-0.136505	0.525588	0.466182	0.449106	0.738397	-0.240605			210-224 p3
	212-224 p1	-0.349172	-0.400937	-0.513639	-0.424488	-0.227604	-0.497838	-0.356104	-0.378975	-0.362771	-0.295395	-0.281505	0.413202	0.435482	0.284391	0.0406366	0.130724	-0.0782663	0.701863	0.659263	0.60137	0.91196	-0.103776			212-224 p1	0.36798	0.566059	0.619874		0.562778	0.393136	0.523361	-0.31078	-0.156266	-0.140459					0.581733	0.17547	-0.287686		1	0.457639	0.569593	0.278118	-0.476714
	225-240 p1	-0.0446457	-0.122849	-0.232213	-0.182382	0.0142476	-0.243782	-0.0921068	-0.194738	-0.180468	-0.0358849	-0.0826598	0.837245	0.8439	0.750139	0.594921	0.673343	0.506717	0.937108	0.903455	0.87437	0.884759	0.473348			225-240 p1	0.907408	0.673054	0.830152		0.723004	0.95216	0.863153	-0.303239	0.468302	0.114081					0.884372	0.298215	-0.202016		0.457639	1	0.914921	0.39406	-0.209155
	225-240 p2	-0.380525	-0.430973	-0.553307	-0.432902	-0.265329	-0.533958	-0.397974	-0.388135	-0.384219	-0.32359	-0.303922	0.33894	0.374198	0.20648	-0.036173	0.044332	-0.157077	0.648016	0.612312	0.567596	0.89883	-0.173043			225-240 p2	0.817374	0.589576	0.878962		0.65549	0.877769	0.744636	-0.21012	0.157092	-0.0902415					0.843108	0.141078	-0.144509		0.569593	0.914921	1	0.663975	-0.325338
	225-240p3	-0.378832	-0.421453	-0.561318	-0.417765	-0.273327	-0.540171	-0.409905	-0.383998	-0.392832	-0.334152	-0.316064	0.323155	0.367819	0.192021	-0.0421355	0.0275123	-0.165873	0.634058	0.602959	0.574287	0.89606	-0.178249			225-240p3	0.430059	0.0185067	0.405648		0.104132	0.448622	0.0776783	-0.238667	-0.383595	-0.276334					0.416848	-0.323596	0.0537478		0.278118	0.39406	0.663975	1	-0.292975
	386-406 p1	0.126919	-0.116449	-0.0993716	-0.027972	-0.139605	-0.14233	0.0766337	0.222661	0.108651	0.293483	0.192589	0.0893062	0.151615	0.0766538	0.106407	0.015953	0.137693	0.0513912	0.0421365	0.0627329	-0.0514772	0.274535			386-406 p1	-0.384827	-0.258344	-0.271957		-0.315218	-0.246336	-0.138314	0.128624	0.218218	-0.279653					-0.473244	-0.084318	0.760012		-0.476714	-0.209155	-0.325338	-0.292975	1
	386-406 p2	-0.307883	-0.253207	-0.536379	-0.2643	-0.160801	-0.443261	-0.371648	-0.356405	-0.419503	-0.424654	-0.411489	0.207561	0.311857	0.0957807	-0.0633502	0.00227671	-0.200655	0.489665	0.456886	0.499563	0.766932	-0.250188			386-406 p2	0.586942	0.842189	0.80112		0.874835	0.638132	0.784683	-0.226423	0.0782507	0.167411					0.724355	-0.0510311	-0.194304		0.515484	0.625969	0.686886	0.343831	-0.374889
	386-406 p3																									386-406 p3
	407-438 p1	-0.295258	-0.394948	-0.373811	-0.407185	-0.315622	-0.490052	-0.34316	-0.310388	-0.272958	-0.122461	-0.121639	0.639451	0.581686	0.539573	0.303983	0.307021	0.211913	0.854572	0.855232	0.803737	0.963223	0.239105			407-438 p1
	407-438 p2	-0.399294	-0.470152	-0.548607	-0.47677	-0.304648	-0.549434	-0.405238	-0.390412	-0.374161	-0.301135	-0.282408	0.349102	0.36482	0.218549	-0.0380563	0.0356374	-0.150939	0.656875	0.620221	0.554274	0.894705	-0.157972			407-438 p2
	407-438 p3																									407-438 p3
TBS	175-190 p1	0.642593	0.820833	0.667169	0.66366	0.699373	0.635627	0.717388	0.335778	0.21717	0.190438	0.17419	0.627303	0.426999	0.783631	0.804575	0.631441	0.49349	0.738245	0.282707	0.172096	0.26496	-0.0359254		TBS	175-190 p1	1	0.221055	-0.228773		0.70674	0.868175	0.434267	0.00319452	0.296905	0.10884		0.687752			0.280164	0.163571	-0.485499	-0.514603	-0.398652	0.0867444	-0.487706	-0.52153	0.213715
	210-224 p1	0.587758	0.368452	0.495317	0.349391	0.347772	0.168259	0.583651	0.244076	0.27442	0.21122	0.197967	0.637682	-0.0531636	0.477535	0.667467	0.360191	0.0984578	0.427271	0.205129	0.254177	0.213583	-0.0365692			210-224 p1	0.221055	1	0.157198		0.11779	0.389822	-0.0663669	-0.25257	-0.202087	0.965653		0.282446			-0.267984	-0.0868671	-0.166881	-0.201421	-0.15377	-0.178317	-0.160121	-0.179966	-0.100664
	210-224 p2	0.322417	0.332155	0.193421	0.201237	0.389617	0.0983246	0.439652	0.374235	0.239112	0.248307	0.256537	0.520572	-0.0848798	0.482382	0.68661	0.720215	0.219127	0.406255	0.470016	0.382703	0.48965	0.0762731			210-224 p2	-0.228773	0.157198	1		0.110359	0.0309339	0.512033	0.09539	-0.459127	0.0724173		0.33346			-0.223176	-0.272736	0.293698	0.432112	0.273182	0.00524978	0.298016	0.30371	-0.232302
	210-224 p3																									210-224 p3
	212-224 p1	0.614569	0.436895	0.507765	0.388307	0.412091	0.207524	0.621268	0.309147	0.297454	0.248005	0.236042	0.662299	-0.015096	0.510801	0.707431	0.405372	0.137991	0.449554	0.269642	0.285733	0.25036	-0.019389			212-224 p1	0.70674	0.11779	0.110359		1	0.629019	0.700541	-0.119381	-0.177266	-0.0861156		0.400311			0.109119	0.399063	-0.202317	-0.100188	-0.156986	0.0848052	-0.260273	-0.316669	0.0410713
	225-240 p1	0.647094	0.682124	0.525087	0.547659	0.700928	0.394545	0.726446	0.556633	0.458877	0.428941	0.421506	0.71551	0.349774	0.641928	0.80537	0.715938	0.280727	0.701059	0.570925	0.43448	0.549311	0.230873			225-240 p1	0.868175	0.389822	0.0309339		0.629019	1	0.401625	-0.0544979	0.184201	0.257168		0.620564			0.302257	-0.0351941	-0.376969	-0.253677	-0.280642	0.236999	-0.366029	-0.38818	0.16008
	225-240 p2	0.648733	0.403122	0.472077	0.43195	0.49709	0.205335	0.671543	0.409486	0.459424	0.343549	0.341836	0.781991	0.10508	0.536337	0.819099	0.606068	0.144036	0.621135	0.415734	0.439855	0.446806	0.196883			225-240 p2	0.434267	-0.0663669	0.512033		0.700541	0.401625	1	0.468855	0.0344827	-0.248625		0.564698			0.23491	0.0443967	0.151414	0.194187	0.20386	0.307316	0.125383	0.0776496	0.300568
	225-240p3	0.187624	0.0502891	-0.126959	0.225849	0.333068	-0.123613	0.115616	0.3285	0.198984	0.335349	0.33588	0.0506431	0.27026	-0.314695	0.114332	0.132673	-0.326842	-0.138997	0.238491	0.362038	0.22083	0.158376			225-240p3	0.00319452	-0.25257	0.09539		-0.119381	-0.0544979	0.468855	1	0.579407	-0.277446		0.114597			0.493539	-0.012067	0.409976	0.246224	0.453216	0.498676	0.438656	0.438386	0.724156
	386-406 p1	0.595621	0.0342708	0.43415	0.401049	0.240017	0.162503	0.679017	0.732151	0.812811	0.754848	0.773306	0.809297	0.454628	0.36663	0.454041	0.312004	-0.0745483	0.728721	0.700382	0.781037	0.754608	0.858222			386-406 p1	0.296905	-0.202087	-0.459127		-0.177266	0.184201	0.0344827	0.579407	1	-0.119907		0.160734			0.267971	-0.192631	-0.305513	-0.355809	-0.249058	0.148328	-0.288845	-0.289117	0.804119
	386-406 p2	0.538343	0.161554	0.558447	0.337126	0.0655388	0.203532	0.634811	0.66099	0.496315	0.70218	0.702625	0.536435	0.281066	0.320015	0.114707	-0.16264	-0.14473	0.354959	0.509818	0.506082	0.42425	0.480969			386-406 p2	0.10884	0.965653	0.0724173		-0.0861156	0.257168	-0.248625	-0.277446	-0.119907	1		0.213091			-0.316058	-0.136674	-0.185462	-0.247681	-0.187142	-0.243787	-0.179799	-0.193173	-0.139914
	386-406 p3																									386-406 p3
	407-438 p1																									407-438 p1	0.687752	0.282446	0.33346		0.400311	0.620564	0.564698	0.114597	0.160734	0.213091		1			-0.0349578	-0.33379	-0.387955	-0.436773	-0.326953	-0.11731	-0.358073	-0.377504	0.0674231
	407-438 p2																									407-438 p2
	407-438 p3																									407-438 p3
SI	175-190 p1	0.446409	0.62351	0.472701	0.453445	0.498258	0.497383	0.51013	0.109167	0.0336764	-0.0507122	-0.0492471	0.509183	0.120611	0.68978	0.731155	0.587969	0.523498	0.564939	0.103004	0.00272188	0.0739208	-0.190186		SI	175-190 p1	0.280164	-0.267984	-0.223176		0.109119	0.302257	0.23491	0.493539	0.267971	-0.316058		-0.0349578			1	0.177898	0.55253	0.464363	0.63506	0.933744	0.564999	0.545234	0.167408
	210-224 p1	0.46992	0.465644	0.430048	0.635744	0.518234	0.503521	0.370248	-0.241163	-0.112071	-0.235778	-0.23493	0.310653	0.442784	0.30278	0.534589	0.381796	0.223744	0.471118	-0.389956	-0.217386	-0.273959	-0.277248			210-224 p1	0.163571	-0.0868671	-0.272736		0.399063	-0.0351941	0.0443967	-0.012067	-0.192631	-0.136674		-0.33379			0.177898	1	0.166044	0.0202676	0.128166	0.0456576	0.0982472	0.0857935	-0.066395
	210-224 p2	-0.23049	-0.222306	-0.125583	-0.304224	-0.179834	-0.318333	-0.216768	-0.0266936	0.102895	0.105434	0.038306	-0.225005	-0.0420043	-0.119553	-0.181845	-0.0598151	-0.223352	-0.0973457	0.093217	0.17487	0.314647	0.0660116			210-224 p2	-0.485499	-0.166881	0.293698		-0.202317	-0.376969	0.151414	0.409976	-0.305513	-0.185462		-0.387955			0.55253	0.166044	1	0.897025	0.991731	0.704223	0.991342	0.978247	-0.181959
	210-224 p3																									210-224 p3	-0.514603	-0.201421	0.432112		-0.100188	-0.253677	0.194187	0.246224	-0.355809	-0.247681		-0.436773			0.464363	0.0202676	0.897025	1	0.893615	0.704658	0.876187	0.862865	-0.196693
	212-224 p1	-0.0613603	0.0249472	-0.23255	-0.181062	0.0908027	-0.272504	-0.0625339	-0.206275	-0.217134	-0.213844	-0.161573	0.0338246	-0.53755	-0.094248	0.16699	0.442802	-0.157881	-0.1471	-0.0706613	-0.224404	-0.0781269	-0.266271			212-224 p1	-0.398652	-0.15377	0.273182		-0.156986	-0.280642	0.20386	0.453216	-0.249058	-0.187142		-0.326953			0.63506	0.128166	0.991731	0.893615	1	0.780481	0.988914	0.972345	-0.128379
	225-240 p1	0.543105	0.574588	0.437465	0.492668	0.622924	0.399227	0.636647	0.423933	0.373381	0.280364	0.285843	0.693557	0.286223	0.665614	0.836403	0.799544	0.382235	0.733894	0.47134	0.369361	0.491212	0.200109			225-240 p1	0.0867444	-0.178317	0.00524978		0.0848052	0.236999	0.307316	0.498676	0.148328	-0.243787		-0.11731			0.933744	0.0456576	0.704223	0.704658	0.780481	1	0.707668	0.680291	0.148208
	225-240 p2	0.288808	0.544907	0.170784	0.301274	0.57744	0.269651	0.388671	0.290761	0.138959	0.0965751	0.105427	0.427985	0.0746106	0.519423	0.728717	0.829606	0.408133	0.450408	0.39514	0.218938	0.373671	-0.0250029			225-240 p2	-0.487706	-0.160121	0.298016		-0.260273	-0.366029	0.125383	0.438656	-0.288845	-0.179799		-0.358073			0.564999	0.0982472	0.991342	0.876187	0.988914	0.707668	1	0.995289	-0.161464
	225-240p3	-0.259482	0.409573	-0.132953	-0.10432	0.220682	0.142178	-0.144296	-0.0346814	-0.294337	-0.219997	-0.239146	-0.248765	-0.111651	0.254975	0.123459	0.371343	0.433704	-0.0669062	0.109374	-0.189969	0.0393447	-0.360834			225-240p3	-0.52153	-0.179966	0.30371		-0.316669	-0.38818	0.0776496	0.438386	-0.289117	-0.193173		-0.377504			0.545234	0.0857935	0.978247	0.862865	0.972345	0.680291	0.995289	1	-0.162126
	386-406 p1	-0.113897	-0.421538	-0.116626	-0.258455	-0.232438	-0.34708	-0.161775	0.0437952	0.391017	0.20768	0.161871	-0.0204421	0.0845388	-0.204615	-0.174055	-0.147931	-0.300141	0.0733274	0.151755	0.314683	0.368346	0.42975			386-406 p1	0.213715	-0.100664	-0.232302		0.0410713	0.16008	0.300568	0.724156	0.804119	-0.139914		0.0674231			0.167408	-0.066395	-0.181959	-0.196693	-0.128379	0.148208	-0.161464	-0.162126	1
	386-406 p2	0.314754	0.255389	0.263951	0.100358	0.169467	0.0734247	0.382177	0.307247	0.189729	0.171704	0.161495	0.46299	-0.265787	0.45848	0.540815	0.290339	0.25329	0.216411	0.337483	0.285045	0.247516	-0.0589932			386-406 p2	-0.623146	-0.253969	0.394855		-0.360702	-0.382571	-0.0199115	0.326592	-0.346702	-0.274183		-0.494363			0.404464	0.0700497	0.86379	0.867135	0.843584	0.562907	0.888976	0.92026	-0.165586
	386-406 p3																									386-406 p3
	407-438 p1																									407-438 p1	-0.167576	-0.198398	0.0313332		-0.262542	-0.164713	0.0631845	0.470339	-0.0749133	-0.190012		-0.123828			0.775492	0.0948859	0.838501	0.610466	0.867892	0.761402	0.870798	0.868906	-0.150896
	407-438 p2																									407-438 p2	-0.444139	-0.15703	0.267042		-0.221306	-0.365054	0.171469	0.471744	-0.249771	-0.173867		-0.321251			0.582348	0.127052	0.992336	0.850972	0.991626	0.714784	0.992821	0.979167	-0.138075
	407-438 p3																									407-438 p3
	#2 Ctrl	6-23	25-44	45-68 0N	68-97 1N	68-87 2N	212-221	243-254	275-286 3R	299-317 4R	354-369	407-438	6-23	25-44	45-68 0N	68-97 1N	68-87 2N	212-221	243-254	275-286 3R	299-317 4R	354-369	407-438			#2 Ctrl	175-190 p1	210-224 p1	210-224 p2	210-224 p3	212-224 p1	225-240 p1	225-240 p2	225-240p3	386-406 p1	386-406 p2	386-406 p3	407-438 p1	407-438 p2	407-438 p3	175-190 p1	210-224 p1	210-224 p2	210-224 p3	212-224 p1	225-240 p1	225-240 p2	225-240p3	386-406 p1
		TBS											SI														TBS														SI
[truncated: 5 more columns]

## Sheet: b) AD
b)		TBS											SI
	#1 AD	6-23	25-44	45-68 0N	68-97 1N	68-87 2N	212-221	243-254	275-286 3R	299-317 4R	354-369	407-438	6-23	25-44	45-68 0N	68-97 1N	68-87 2N	212-221	243-254	275-286 3R	299-317 4R	354-369	407-438
TBS	6-23	1	0.69916	0.866284	0.886829	0.676101	0.901775	0.723657	0.509234	-0.0218879	-0.00549048	0.684433	-0.230499	0.234621	-0.179135	0.0466167	0.234999	0.254482	-0.294637	-0.331671	-0.21983	-0.316143	0.613114
	25-44	0.69916	1	0.693387	0.847124	0.967065	0.718674	0.40883	0.43611	-0.167868	0.0236228	0.198374	0.0176414	0.460156	0.162578	0.258151	0.638059	0.400187	0.0771268	-0.0250399	0.0521475	-0.00636967	0.294514
	45-68 0N	0.866284	0.693387	1	0.842768	0.688755	0.830254	0.672328	0.402002	-0.109479	0.0170323	0.571573	-0.238962	0.238645	-0.100139	-0.0974372	0.16514	0.138317	-0.0417633	-0.0836912	0.0401487	-0.0425326	0.416561
	68-97 1N	0.886829	0.847124	0.842768	1	0.829632	0.939361	0.48745	0.272144	-0.351387	-0.24336	0.416884	-0.275469	0.212464	-0.173349	0.0326942	0.35474	0.136257	-0.243491	-0.324687	-0.215798	-0.287948	0.390884
	68-87 2N	0.676101	0.967065	0.688755	0.829632	1	0.70146	0.280933	0.296705	-0.230205	-0.124976	0.227153	0.00983469	0.458166	0.189517	0.279917	0.720676	0.331909	0.0536111	-0.0540319	-0.0175492	-0.052413	0.357364
	212-221	0.901775	0.718674	0.830254	0.939361	0.70146	1	0.531394	0.264189	-0.260881	-0.240927	0.564737	-0.506718	-0.00434238	-0.431867	-0.214576	0.137721	-0.0058976	-0.379003	-0.444944	-0.310113	-0.387657	0.484625
	243-254	0.723657	0.40883	0.672328	0.48745	0.280933	0.531394	1	0.874084	0.527473	0.62687	0.397621	-0.0257866	0.395439	-0.0339605	0.0576519	-0.0638857	0.461101	0.19112	0.209681	0.357514	0.239995	0.29671
	275-286 3R	0.509234	0.43611	0.402002	0.272144	0.296705	0.264189	0.874084	1	0.69113	0.828719	0.183908	0.264214	0.635911	0.237681	0.323205	0.14536	0.705763	0.438045	0.450872	0.569468	0.455792	0.180847
	299-317 4R	-0.0218879	-0.167868	-0.109479	-0.351387	-0.230205	-0.260881	0.527473	0.69113	1	0.848668	-0.0402386	0.304165	0.406914	0.274716	0.232627	-0.0253235	0.559132	0.532922	0.590198	0.580258	0.557438	0.131416
	354-369	-0.00549048	0.0236228	0.0170323	-0.24336	-0.124976	-0.240927	0.62687	0.828719	0.848668	1	-0.105309	0.444643	0.511354	0.394267	0.261446	-0.0532362	0.642682	0.65599	0.709152	0.7751	0.704565	-0.0900294
	407-438	0.684433	0.198374	0.571573	0.416884	0.227153	0.564737	0.397621	0.183908	-0.0402386	-0.105309	1	-0.259814	-0.203877	-0.293486	-0.219939	-0.0787911	0.0142749	-0.655269	-0.626686	-0.550897	-0.635189	0.824072
SI	6-23	-0.230499	0.0176414	-0.238962	-0.275469	0.00983469	-0.506718	-0.0257866	0.264214	0.304165	0.444643	-0.259814	1	0.750068	0.949361	0.887938	0.565609	0.770812	0.447375	0.482179	0.381416	0.361674	0.0396313
	25-44	0.234621	0.460156	0.238645	0.212464	0.458166	-0.00434238	0.395439	0.635911	0.406914	0.511354	-0.203877	0.750068	1	0.799293	0.858696	0.702403	0.822793	0.644459	0.630053	0.59364	0.547635	0.0896286
	45-68 0N	-0.179135	0.162578	-0.100139	-0.173349	0.189517	-0.431867	-0.0339605	0.237681	0.274716	0.394267	-0.293486	0.949361	0.799293	1	0.863997	0.69557	0.751366	0.564081	0.569596	0.45114	0.456875	0.0427696
	68-97 1N	0.0466167	0.258151	-0.0974372	0.0326942	0.279917	-0.214576	0.0576519	0.323205	0.232627	0.261446	-0.219939	0.887938	0.858696	0.863997	1	0.771364	0.802223	0.352546	0.350911	0.243327	0.224911	0.167086
	68-87 2N	0.234999	0.638059	0.16514	0.35474	0.720676	0.137721	-0.0638857	0.14536	-0.0253235	-0.0532362	-0.0787911	0.565609	0.702403	0.69557	0.771364	1	0.646868	0.222929	0.148048	0.0405285	0.0546653	0.363964
	212-221	0.254482	0.400187	0.138317	0.136257	0.331909	-0.0058976	0.461101	0.705763	0.559132	0.642682	0.0142749	0.770812	0.822793	0.751366	0.802223	0.646868	1	0.379751	0.387108	0.364662	0.297	0.394145
	243-254	-0.294637	0.0771268	-0.0417633	-0.243491	0.0536111	-0.379003	0.19112	0.438045	0.532922	0.65599	-0.655269	0.447375	0.644459	0.564081	0.352546	0.222929	0.379751	1	0.990703	0.962397	0.984488	-0.496856
	275-286 3R	-0.331671	-0.0250399	-0.0836912	-0.324687	-0.0540319	-0.444944	0.209681	0.450872	0.590198	0.709152	-0.626686	0.482179	0.630053	0.569596	0.350911	0.148048	0.387108	0.990703	1	0.972494	0.988141	-0.491423
	299-317 4R	-0.21983	0.0521475	0.0401487	-0.215798	-0.0175492	-0.310113	0.357514	0.569468	0.580258	0.7751	-0.550897	0.381416	0.59364	0.45114	0.243327	0.0405285	0.364662	0.962397	0.972494	1	0.986409	-0.503657
	354-369	-0.316143	-0.00636967	-0.0425326	-0.287948	-0.052413	-0.387657	0.239995	0.455792	0.557438	0.704565	-0.635189	0.361674	0.547635	0.456875	0.224911	0.0546653	0.297	0.984488	0.988141	0.986409	1	-0.556189
	407-438	0.613114	0.294514	0.416561	0.390884	0.357364	0.484625	0.29671	0.180847	0.131416	-0.0900294	0.824072	0.0396313	0.0896286	0.0427696	0.167086	0.363964	0.394145	-0.496856	-0.491423	-0.503657	-0.556189	1
TBS	6-23	1	0.953718	0.972193	0.967716	0.860469	0.927435	0.823405	0.493067	0.460515	-0.0236225	0.881444	-0.174655	-0.288713	-0.21368	-0.31377	-0.266821	-0.353851	-0.405597	-0.372771	-0.444486	-0.458291	0.186429
	25-44	0.953718	1	0.962827	0.972905	0.907169	0.96225	0.714109	0.365316	0.279901	-0.170435	0.779548	-0.273756	-0.312271	-0.286151	-0.353838	-0.29733	-0.376482	-0.420375	-0.395823	-0.492191	-0.514283	0.109062
	45-68 0N	0.972193	0.962827	1	0.930444	0.822711	0.917494	0.833368	0.501353	0.470779	0.0106734	0.752059	-0.112061	-0.195588	-0.118824	-0.25463	-0.214906	-0.278081	-0.329746	-0.319958	-0.382279	-0.393792	0.263034
	68-97 1N	0.967716	0.972905	0.930444	1	0.903613	0.96328	0.719329	0.353293	0.291589	-0.176745	0.879649	-0.308884	-0.391289	-0.362165	-0.398757	-0.340788	-0.438517	-0.471431	-0.447405	-0.533765	-0.55853	0.0283764
	68-87 2N	0.860469	0.907169	0.822711	0.903613	1	0.9248	0.509585	0.155141	0.0714035	-0.369236	0.775012	-0.508038	-0.528123	-0.516962	-0.513494	-0.427864	-0.543416	-0.588867	-0.527319	-0.643558	-0.668902	-0.140967
	212-221	0.927435	0.96225	0.917494	0.96328	0.9248	1	0.606006	0.189115	0.150742	-0.344733	0.804193	-0.465913	-0.522222	-0.474654	-0.55731	-0.497878	-0.575142	-0.612614	-0.590329	-0.675967	-0.692383	-0.0934851
	243-254	0.823405	0.714109	0.833368	0.719329	0.509585	0.606006	1	0.864673	0.846546	0.52599	0.641744	0.389367	0.224809	0.288085	0.222829	0.250605	0.168574	0.124366	0.12031	0.0953517	0.0789439	0.638149
	275-286 3R	0.493067	0.365316	0.501353	0.353293	0.155141	0.189115	0.864673	1	0.929024	0.812212	0.369829	0.730965	0.596965	0.624788	0.603765	0.613767	0.548125	0.49739	0.521356	0.494957	0.480876	0.877495
	299-317 4R	0.460515	0.279901	0.470779	0.291589	0.0714035	0.150742	0.846546	0.929024	1	0.851306	0.351717	0.693776	0.486842	0.575776	0.493868	0.472703	0.423101	0.394824	0.362052	0.41918	0.412873	0.758599
	354-369	-0.0236225	-0.170435	0.0106734	-0.176745	-0.369236	-0.344733	0.52599	0.812212	0.851306	1	-0.116295	0.940187	0.803802	0.819558	0.840944	0.804857	0.786244	0.784249	0.733989	0.813109	0.805135	0.821894
	407-438	0.881444	0.779548	0.752059	0.879649	0.775012	0.804193	0.641744	0.369829	0.351717	-0.116295	1	-0.305905	-0.466823	-0.405435	-0.434489	-0.391095	-0.501674	-0.540965	-0.477416	-0.546762	-0.562521	-0.0314389
SI	6-23	-0.174655	-0.273756	-0.112061	-0.308884	-0.508038	-0.465913	0.389367	0.730965	0.693776	0.940187	-0.305905	1	0.949416	0.941998	0.946283	0.90884	0.92938	0.919798	0.891788	0.935164	0.935306	0.87416
	25-44	-0.288713	-0.312271	-0.195588	-0.391289	-0.528123	-0.522222	0.224809	0.596965	0.486842	0.803802	-0.466823	0.949416	1	0.961919	0.963697	0.932348	0.976489	0.960729	0.954088	0.958998	0.960943	0.835812
	45-68 0N	-0.21368	-0.286151	-0.118824	-0.362165	-0.516962	-0.474654	0.288085	0.624788	0.575776	0.819558	-0.405435	0.941998	0.961919	1	0.884176	0.832501	0.899907	0.871958	0.865524	0.895143	0.912841	0.84226
	68-97 1N	-0.31377	-0.353838	-0.25463	-0.398757	-0.513494	-0.55731	0.222829	0.603765	0.493868	0.840944	-0.434489	0.946283	0.963697	0.884176	1	0.98947	0.99102	0.988157	0.97874	0.984803	0.973633	0.798454
	68-87 2N	-0.266821	-0.29733	-0.214906	-0.340788	-0.427864	-0.497878	0.250605	0.613767	0.472703	0.804857	-0.391095	0.90884	0.932348	0.832501	0.98947	1	0.980018	0.971359	0.977661	0.958299	0.94183	0.798622
	212-221	-0.353851	-0.376482	-0.278081	-0.438517	-0.543416	-0.575142	0.168574	0.548125	0.423101	0.786244	-0.501674	0.92938	0.976489	0.899907	0.99102	0.980018	1	0.991082	0.989295	0.984866	0.979664	0.796879
	243-254	-0.405597	-0.420375	-0.329746	-0.471431	-0.588867	-0.612614	0.124366	0.49739	0.394824	0.784249	-0.540965	0.919798	0.960729	0.871958	0.988157	0.971359	0.991082	1	0.973082	0.989512	0.979775	0.735819
	275-286 3R	-0.372771	-0.395823	-0.319958	-0.447405	-0.527319	-0.590329	0.12031	0.521356	0.362052	0.733989	-0.477416	0.891788	0.954088	0.865524	0.97874	0.977661	0.989295	0.973082	1	0.970211	0.964956	0.768509
	299-317 4R	-0.444486	-0.492191	-0.382279	-0.533765	-0.643558	-0.675967	0.0953517	0.494957	0.41918	0.813109	-0.546762	0.935164	0.958998	0.895143	0.984803	0.958299	0.984866	0.989512	0.970211	1	0.997165	0.730887
	354-369	-0.458291	-0.514283	-0.393792	-0.55853	-0.668902	-0.692383	0.0789439	0.480876	0.412873	0.805135	-0.562521	0.935306	0.960943	0.912841	0.973633	0.94183	0.979664	0.979775	0.964956	0.997165	1	0.733054
	407-438	0.186429	0.109062	0.263034	0.0283764	-0.140967	-0.0934851	0.638149	0.877495	0.758599	0.821894	-0.0314389	0.87416	0.835812	0.84226	0.798454	0.798622	0.796879	0.735819	0.768509	0.730887	0.733054	1
	#2 AD	6-23	25-44	45-68 0N	68-97 1N	68-87 2N	212-221	243-254	275-286 3R	299-317 4R	354-369	407-438	6-23	25-44	45-68 0N	68-97 1N	68-87 2N	212-221	243-254	275-286 3R	299-317 4R	354-369	407-438
		TBS											SI
		TBS											SI														TBS														SI
	#1 AD	6-23	25-44	45-68 0N	68-97 1N	68-87 2N	212-221	243-254	275-286 3R	299-317 4R	354-369	407-438	6-23	25-44	45-68 0N	68-97 1N	68-87 2N	212-221	243-254	275-286 3R	299-317 4R	354-369	407-438			#1 AD	175-190 p1	210-224 p1	210-224 p2	210-224 p3	212-224 p1	225-240 p1	225-240 p2	225-240p3	386-406 p1	386-406 p2	386-406 p3	407-438 p1	407-438 p2	407-438 p3	175-190 p1	210-224 p1	210-224 p2	210-224 p3	212-224 p1	225-240 p1	225-240 p2	225-240p3	386-406 p1
TBS	175-190 p1	0.246077	0.168713	0.5056	0.275908	0.157632	0.391501	0.474658	0.237721	0.264245	0.210473	-0.0628166	-0.477556	0.0513984	-0.315901	-0.434657	-0.238761	-0.116229	0.444262	0.417545	0.518815	0.508442	-0.100436		TBS	175-190 p1	1	0.676693	0.562028	0.488012	0.556497	0.413667	0.376506	0.362022	0.235105	0.356416		0.0720041	-0.156908		0.236343	0.398622	0.339692	0.40218	0.149115	-0.0464852	0.102357	0.268237	0.631328
	210-224 p1	-0.221094	0.221314	0.074535	-0.0485103	0.164353	-0.0845651	0.163234	0.244362	0.344814	0.453695	-0.57197	0.080519	0.344488	0.240739	-0.0120613	0.137609	0.24899	0.827281	0.781497	0.811824	0.832954	-0.391955			210-224 p1	0.676693	1	0.891673	0.752557	0.902208	0.0986778	0.51673	0.527585	0.640492	0.600521		0.484034	0.150456		0.684805	0.82427	0.706378	0.84307	0.645492	0.573688	0.574003	0.660941	0.814158
	210-224 p2	-0.342336	-0.0725617	-0.103629	-0.290781	-0.181389	-0.316443	0.268479	0.355354	0.551215	0.680851	-0.595151	0.269882	0.376338	0.313697	0.0800505	-0.083674	0.359073	0.856778	0.870472	0.907145	0.902481	-0.460028			210-224 p2	0.562028	0.891673	1	0.861903	0.951733	0.0403158	0.672936	0.725632	0.863598	0.736401		0.759561	0.49455		0.807898	0.790463	0.840829	0.827045	0.766005	0.663147	0.683642	0.783638	0.794013
	210-224 p3	-0.613487	-0.430188	-0.32972	-0.599595	-0.475084	-0.567902	-0.0318287	0.0326857	0.496471	0.495587	-0.604448	0.0891993	0.0150014	0.159637	-0.18117	-0.310202	-0.00788759	0.721745	0.751584	0.726066	0.786344	-0.538435			210-224 p3	0.488012	0.752557	0.861903	1	0.819923	-0.216644	0.439792	0.520132	0.811395	0.638908		0.665545	0.458098		0.653384	0.597063	0.651317	0.699472	0.631224	0.499417	0.519192	0.655577	0.734036
	212-224 p1	-0.271813	0.0556336	-0.0408381	-0.248572	-0.0525446	-0.268707	0.326481	0.491922	0.610665	0.759981	-0.544144	0.206216	0.382665	0.280534	0.0426984	-0.037647	0.328906	0.869272	0.867131	0.912588	0.908579	-0.450842			212-224 p1	0.556497	0.902208	0.951733	0.819923	1	0.184233	0.755051	0.795277	0.845724	0.851334		0.7708	0.470452		0.791741	0.823006	0.828228	0.858696	0.742698	0.639336	0.657983	0.765975	0.823737
	225-240 p1	0.828202	0.609026	0.772944	0.603479	0.577029	0.621256	0.877254	0.818137	0.455245	0.458819	0.499694	-0.0191979	0.525717	0.0712652	0.172155	0.262231	0.482698	0.197278	0.17846	0.275508	0.183961	0.486569			225-240 p1	0.413667	0.0986778	0.0403158	-0.216644	0.184233	1	0.589034	0.53741	-0.0118972	0.429567		0.0026115	0.102834		0.149796	0.157892	0.21839	0.0785804	0.0769102	0.0213675	0.151064	0.166866	0.25206
	225-240 p2	0.143125	0.183278	0.15766	-0.0138857	0.0716626	-0.0843075	0.688025	0.842819	0.768846	0.864868	-0.279392	0.375229	0.693629	0.395079	0.381897	0.0982723	0.588567	0.794099	0.810999	0.857572	0.809673	-0.227372			225-240 p2	0.376506	0.51673	0.672936	0.439792	0.755051	0.589034	1	0.977526	0.697119	0.924917		0.645017	0.594763		0.777263	0.741507	0.85841	0.648194	0.743164	0.631204	0.763215	0.79104	0.748187
	225-240p3	0.0565634	0.0708584	0.0849857	-0.144929	-0.0484334	-0.175634	0.671459	0.836257	0.851426	0.941314	-0.234695	0.402739	0.630976	0.395903	0.331509	0.0184151	0.606408	0.775734	0.811972	0.859927	0.807031	-0.179745			225-240p3	0.362022	0.527585	0.725632	0.520132	0.795277	0.53741	0.977526	1	0.768769	0.942831		0.768359	0.713361		0.790865	0.69139	0.852492	0.658188	0.753484	0.642156	0.736088	0.790066	0.709078
	386-406 p1	-0.406687	-0.225641	-0.317405	-0.472174	-0.381509	-0.498939	0.26567	0.436109	0.679113	0.799453	-0.535964	0.334608	0.237019	0.31367	0.109292	-0.172924	0.385023	0.667902	0.704951	0.718748	0.721423	-0.416229			386-406 p1	0.235105	0.640492	0.863598	0.811395	0.845724	-0.0118972	0.697119	0.768769	1	0.838353		0.877031	0.766826		0.669239	0.568688	0.687323	0.584539	0.6574	0.590409	0.599782	0.645775	0.565132
	386-406 p2	-0.0786805	0.0425918	-0.0184768	-0.237225	-0.074025	-0.264332	0.529246	0.739226	0.818895	0.897562	-0.348533	0.291841	0.486004	0.33979	0.188232	-0.0274922	0.46803	0.835633	0.853274	0.882967	0.870679	-0.33042			386-406 p2	0.356416	0.600521	0.736401	0.638908	0.851334	0.429567	0.924917	0.942831	0.838353	1		0.757423	0.6689		0.788147	0.749572	0.842274	0.718723	0.758457	0.641688	0.728923	0.790716	0.794631
	386-406 p3																									386-406 p3
	407-438 p1	-0.426641	-0.285342	-0.366491	-0.575686	-0.434073	-0.553993	0.258183	0.506715	0.719436	0.882009	-0.350465	0.446505	0.274618	0.338132	0.154956	-0.21064	0.439917	0.59449	0.66195	0.69848	0.659195	-0.311646			407-438 p1	0.0720041	0.484034	0.759561	0.665545	0.7708	0.0026115	0.645017	0.768359	0.877031	0.757423		1	0.838374		0.687915	0.505706	0.687097	0.613198	0.663498	0.607975	0.546117	0.632851	0.439698
	407-438 p2	-0.268884	-0.357992	-0.37184	-0.56088	-0.466347	-0.554905	0.305811	0.511559	0.823633	0.818135	-0.116979	0.602536	0.337152	0.477467	0.384188	-0.0561743	0.624834	0.383509	0.471617	0.439151	0.41	0.0460683			407-438 p2	-0.156908	0.150456	0.49455	0.458098	0.470452	0.102834	0.594763	0.713361	0.766826	0.6689		0.838374	1		0.547887	0.234154	0.512903	0.290167	0.57854	0.56842	0.534457	0.52407	0.215571
	407-438 p3																									407-438 p3
SI	175-190 p1	-0.341321	-0.0159073	-0.125796	-0.349318	-0.0414434	-0.503142	0.172366	0.455311	0.576498	0.722093	-0.581097	0.664593	0.727896	0.720151	0.516462	0.26213	0.522836	0.954247	0.972915	0.929316	0.932617	-0.401606		SI	175-190 p1	0.236343	0.684805	0.807898	0.653384	0.791741	0.149796	0.777263	0.790865	0.669239	0.788147		0.687915	0.547887		1	0.886423	0.978919	0.91594	0.974842	0.926163	0.944426	0.991716	0.843727
	210-224 p1	-0.271655	0.197437	-0.0765564	-0.143736	0.172505	-0.290506	0.120948	0.409189	0.414666	0.544906	-0.738724	0.389798	0.654305	0.497611	0.379876	0.306351	0.347144	0.958767	0.925258	0.904444	0.926263	-0.550005			210-224 p1	0.398622	0.82427	0.790463	0.597063	0.823006	0.157892	0.741507	0.69139	0.568688	0.749572		0.505706	0.234154		0.886423	1	0.918879	0.940825	0.882497	0.811654	0.860847	0.890133	0.91
	210-224 p2	-0.27213	0.00442606	-0.082689	-0.281219	-0.0428811	-0.416235	0.275366	0.538317	0.600673	0.74777	-0.605912	0.558804	0.714732	0.601467	0.45572	0.175074	0.47481	0.964335	0.980853	0.965697	0.959084	-0.468393			210-224 p2	0.339692	0.706378	0.840829	0.651317	0.828228	0.21839	0.85841	0.852492	0.687323	0.842274		0.687097	0.512903		0.978919	0.918879	1	0.90907	0.94998	0.863285	0.92428	0.980385	0.88355
	210-224 p3	-0.392315	0.0711197	-0.0970805	-0.299328	0.0572357	-0.403574	0.053552	0.332375	0.42672	0.593443	-0.638945	0.40375	0.553549	0.506173	0.258471	0.19305	0.289226	0.953086	0.940987	0.926225	0.943673	-0.520775			210-224 p3	0.40218	0.84307	0.827045	0.699472	0.858696	0.0785804	0.648194	0.658188	0.584539	0.718723		0.613198	0.290167		0.91594	0.940825	0.90907	1	0.876997	0.807181	0.79907	0.896468	0.892667
	212-224 p1	-0.404684	-0.063635	-0.265631	-0.413381	-0.070431	-0.563558	0.0743589	0.395414	0.613095	0.667954	-0.648458	0.694754	0.733859	0.739806	0.594882	0.340179	0.551148	0.924567	0.939404	0.860588	0.882092	-0.369492			212-224 p1	0.149115	0.645492	0.766005	0.631224	0.742698	0.0769102	0.743164	0.753484	0.6574	0.758457		0.663498	0.57854		0.974842	0.882497	0.94998	0.876997	1	0.962926	0.974597	0.976551	0.805635
	225-240 p1	-0.391692	0.0418104	-0.281052	-0.363714	0.0374049	-0.56135	-0.0156318	0.341296	0.505867	0.599007	-0.610186	0.824986	0.780519	0.870134	0.725832	0.518226	0.663167	0.840218	0.844383	0.746789	0.766793	-0.262626			225-240 p1	-0.0464852	0.573688	0.663147	0.499417	0.639336	0.0213675	0.631204	0.642156	0.590409	0.641688		0.607975	0.56842		0.926163	0.811654	0.863285	0.807181	0.962926	1	0.957093	0.909836	0.664476
	225-240 p2	-0.284135	0.038134	-0.182273	-0.280497	0.0340122	-0.480528	0.124274	0.423228	0.556035	0.611186	-0.63004	0.737908	0.816594	0.798593	0.702978	0.447488	0.612097	0.896732	0.901184	0.812959	0.834186	-0.325465			225-240 p2	0.102357	0.574003	0.683642	0.519192	0.657983	0.151064	0.763215	0.736088	0.599782	0.728923		0.546117	0.534457		0.944426	0.860847	0.92428	0.79907	0.974597	0.957093	1	0.958655	0.778005
	225-240p3	-0.327584	-0.0464869	-0.124122	-0.345466	-0.0560615	-0.498108	0.173943	0.434923	0.58802	0.68413	-0.595488	0.63148	0.727051	0.697595	0.515943	0.253903	0.485517	0.959925	0.977961	0.922406	0.935829	-0.411634			225-240p3	0.268237	0.660941	0.783638	0.655577	0.765975	0.166866	0.79104	0.790066	0.645775	0.790716		0.632851	0.52407		0.991716	0.890133	0.980385	0.896468	0.976551	0.909836	0.958655	1	0.875856
	386-406 p1	-0.224642	0.0433874	0.0552876	-0.179266	0.0490403	-0.265135	0.21398	0.365889	0.488719	0.533457	-0.602195	0.200074	0.504816	0.355015	0.151142	0.0905178	0.164762	0.954217	0.937761	0.918604	0.956172	-0.521978			386-406 p1	0.631328	0.814158	0.794013	0.734036	0.823737	0.25206	0.748187	0.709078	0.565132	0.794631		0.439698	0.215571		0.843727	0.91	0.88355	0.892667	0.805635	0.664476	0.778005	0.875856	1
	386-406 p2	-0.331307	0.0093076	-0.0934606	-0.305615	-0.016104	-0.419302	0.190431	0.443739	0.587506	0.687519	-0.655299	0.445836	0.623761	0.543547	0.338875	0.176631	0.376994	0.995668	0.995541	0.966374	0.987414	-0.49438			386-406 p2	0.442705	0.818152	0.875995	0.751526	0.881347	0.177655	0.803963	0.799258	0.696044	0.852927		0.643286	0.436309		0.959639	0.949676	0.972299	0.952791	0.9372	0.841835	0.896196	0.965713	0.948935
	386-406 p3	0.0767311	0.259733	0.289685	0.127486	0.352938	-0.00811716	0.206606	0.294102	0.265183	0.228683	-0.366237	0.230328	0.663064	0.416196	0.349857	0.373839	0.194506	0.779226	0.741899	0.6932	0.723929	-0.261823			386-406 p3	0.520388	0.525687	0.40685	0.309986	0.463186	0.429979	0.589905	0.487024	0.116079	0.480096		0.0227724	-0.0763812		0.687234	0.776054	0.717962	0.701235	0.665726	0.564066	0.708162	0.74475	0.854191
	407-438 p1	-0.372832	-0.238468	-0.157119	-0.415974	-0.175555	-0.401349	0.0421429	0.161787	0.613167	0.427318	-0.531243	0.0882155	0.288855	0.235748	0.0308693	-0.000433883	0.0459963	0.807488	0.808969	0.732649	0.810167	-0.370522			407-438 p1	0.600359	0.702486	0.696932	0.808076	0.709169	0.111508	0.577642	0.585633	0.52787	0.705263		0.401583	0.294904		0.702296	0.730745	0.717908	0.746674	0.725927	0.56565	0.66322	0.755121	0.893394
	407-438 p2	-0.381922	-0.156573	-0.0652852	-0.267449	-0.0561283	-0.221147	-0.224245	-0.209817	0.120531	-0.00461858	-0.475369	-0.307594	-0.078498	-0.109644	-0.354621	-0.144628	-0.429517	0.572895	0.536812	0.493401	0.591967	-0.509261			407-438 p2	0.63157	0.619158	0.43008	0.647118	0.497111	-0.0855522	0.168555	0.147285	0.178094	0.335779		0.0513527	-0.230382		0.378862	0.560713	0.400655	0.614807	0.364694	0.205746	0.279205	0.424722	0.743753
	407-438 p3	0.196818	0.237724	0.220322	0.165282	0.409967	0.0484129	0.0602002	0.108809	0.241818	-0.039817	-0.0971209	0.29554	0.622025	0.477748	0.527724	0.635862	0.311797	0.427033	0.388339	0.253251	0.308907	0.207721			407-438 p3	0.224345	0.162962	0.0121807	-0.00241707	0.0503092	0.413568	0.302167	0.206177	-0.162313	0.167643		-0.272113	-0.0694909		0.392172	0.417753	0.366648	0.306342	0.46133	0.443166	0.552969	0.469913	0.488227
TBS	175-190 p1	0.122114	0.0532147	0.213633	0.0132145	-0.0698147	-0.00708921	0.56616	0.655445	0.668814	0.680573	-0.110557	0.633341	0.52743	0.523755	0.570502	0.602803	0.552962	0.537004	0.491427	0.512288	0.49906	0.687241		TBS	175-190 p1	1	0.588328	0.614339	0.597327	0.59178	0.833537	0.701441	0.670364	0.613458	0.670675		0.647404	0.661493		0.531163	0.313877	0.530777	0.434182	0.51264	0.506348	0.525825	0.556128	0.47564
	210-224 p1	-0.150283	-0.340479	-0.129289	-0.316345	-0.502914	-0.408314	0.324165	0.509572	0.674658	0.813848	-0.178268	0.710021	0.503189	0.547203	0.572003	0.526643	0.530159	0.543527	0.46137	0.598833	0.606039	0.568562			210-224 p1	0.588328	1	0.720067	0.723996	0.73733	0.624944	0.757359	0.807813	0.769174	0.761488		0.697615	0.756098		0.582605	0.436142	0.539198	0.35053	0.580852	0.542812	0.512812	0.617966	0.521033
	210-224 p2	-0.404367	-0.467672	-0.334032	-0.504212	-0.62863	-0.641044	0.168513	0.540603	0.528754	0.889174	-0.515936	0.944667	0.915498	0.860024	0.959592	0.926804	0.940434	0.959054	0.900823	0.970713	0.962022	0.723436			210-224 p2	0.614339	0.720067	1	0.8126	0.951588	0.62156	0.957844	0.96323	0.878468	0.82843		0.577034	0.703584		0.960595	0.726712	0.949974	0.862923	0.9433	0.90289	0.896755	0.971459	0.920508
	210-224 p3	-0.157795	-0.273311	-0.179154	-0.259306	-0.334074	-0.425288	0.319638	0.64495	0.562191	0.805259	-0.146454	0.786345	0.691327	0.595165	0.832048	0.860711	0.788067	0.773893	0.796815	0.790122	0.769864	0.722843			210-224 p3	0.597327	0.723996	0.8126	1	0.64372	0.461346	0.82264	0.875699	0.810647	0.954696		0.541181	0.818482		0.727199	0.244993	0.751627	0.723357	0.693925	0.630014	0.669019	0.777819	0.739833
	212-224 p1	-0.512653	-0.576147	-0.413321	-0.621349	-0.761054	-0.702579	0.0482265	0.395568	0.458945	0.81931	-0.640273	0.886207	0.855841	0.846608	0.853613	0.791466	0.851618	0.880635	0.790003	0.904134	0.909598	0.619026			212-224 p1	0.59178	0.73733	0.951588	0.64372	1	0.65752	0.894625	0.887291	0.820327	0.687921		0.575045	0.608717		0.912511	0.822187	0.873566	0.749709	0.913321	0.885962	0.845883	0.906847	0.85774
	225-240 p1	0.161074	0.0916056	0.278465	0.0142891	-0.161468	-0.0191644	0.603645	0.751598	0.808142	0.776008	-0.0703165	0.715719	0.603058	0.658526	0.547168	0.514897	0.524888	0.505369	0.437162	0.501205	0.499997	0.767267			225-240 p1	0.833537	0.624944	0.62156	0.461346	0.65752	1	0.766796	0.703808	0.728388	0.628739		0.878146	0.707687		0.599829	0.452493	0.565493	0.284447	0.624808	0.640179	0.650614	0.602547	0.498197
	225-240 p2	-0.171928	-0.265498	-0.0982535	-0.316297	-0.462845	-0.456457	0.39772	0.735676	0.72252	0.962673	-0.324394	0.97784	0.914083	0.899854	0.932177	0.902191	0.905964	0.897965	0.85871	0.914331	0.909281	0.864961			225-240 p2	0.701441	0.757359	0.957844	0.82264	0.894625	0.766796	1	0.988001	0.958671	0.903727		0.771556	0.844946		0.93255	0.646155	0.923997	0.753408	0.922736	0.904532	0.917696	0.95276	0.881499
	225-240p3	-0.207844	-0.32459	-0.161756	-0.347817	-0.491981	-0.503781	0.363951	0.709048	0.71259	0.97006	-0.30433	0.962278	0.873037	0.849909	0.925179	0.897689	0.887486	0.887432	0.84716	0.91273	0.904983	0.814003			225-240p3	0.670364	0.807813	0.96323	0.875699	0.887291	0.703808	0.988001	1	0.947697	0.924486		0.726851	0.852399		0.907439	0.630977	0.899046	0.754778	0.888618	0.854924	0.867699	0.936756	0.857692
	386-406 p1	-0.144236	-0.274521	-0.0889729	-0.330864	-0.455947	-0.457473	0.382761	0.741534	0.725439	0.926458	-0.261532	0.94185	0.872362	0.898343	0.865905	0.830763	0.849249	0.812669	0.817768	0.856986	0.86713	0.890273			386-406 p1	0.613458	0.769174	0.878468	0.810647	0.820327	0.728388	0.958671	0.947697	1	0.928028		0.855296	0.926746		0.873099	0.526906	0.862562	0.645149	0.878331	0.87682	0.891942	0.900982	0.851663
	386-406 p2	-0.03644	-0.174208	-0.0276246	-0.191719	-0.296652	-0.346031	0.46649	0.785352	0.717326	0.890686	-0.10053	0.874413	0.774809	0.741749	0.851459	0.862848	0.817165	0.779437	0.809591	0.806242	0.799336	0.87302			386-406 p2	0.670675	0.761488	0.82843	0.954696	0.687921	0.628739	0.903727	0.924486	0.928028	1		0.747857	0.937014		0.781726	0.304835	0.79737	0.67	0.761979	0.733866	0.774459	0.829774	0.78221
	386-406 p3																									386-406 p3
	407-438 p1	0.212209	0.0733436	0.287842	-0.00501052	-0.146795	-0.062952	0.610318	0.804538	0.852827	0.798835	0.037402	0.726086	0.600198	0.705248	0.53318	0.493403	0.513067	0.454564	0.451761	0.497325	0.514653	0.841553			407-438 p1	0.647404	0.697615	0.577034	0.541181	0.575045	0.878146	0.771556	0.726851	0.855296	0.747857		1	0.884786		0.575901	0.317142	0.549494	0.208693	0.611345	0.644506	0.664744	0.600473	0.519359
	407-438 p2	0.0786652	-0.103588	0.0850787	-0.127961	-0.205766	-0.245508	0.532379	0.819129	0.814703	0.870502	0.015383	0.798358	0.664694	0.714094	0.69753	0.692715	0.659519	0.601229	0.643793	0.658124	0.665622	0.848604			407-438 p2	0.661493	0.756098	0.703584	0.818482	0.608717	0.707687	0.844946	0.852399	0.926746	0.937014		0.884786	1		0.653126	0.28919	0.654442	0.441364	0.649064	0.646804	0.688645	0.709114	0.637446
	407-438 p3																									407-438 p3
SI	175-190 p1	-0.369367	-0.398387	-0.279864	-0.464269	-0.610519	-0.598936	0.169676	0.55148	0.475317	0.830304	-0.521547	0.957549	0.987444	0.93702	0.97458	0.936731	0.979193	0.980554	0.948894	0.981611	0.980111	0.788238		SI	175-190 p1	0.531163	0.582605	0.960595	0.727199	0.912511	0.599829	0.93255	0.907439	0.873099	0.781726		0.575901	0.653126		1	0.698963	0.994211	0.887596	0.991919	0.978373	0.976237	0.995057	0.979667
	210-224 p1	-0.454422	-0.501916	-0.372506	-0.515544	-0.633898	-0.592791	-0.0412663	0.19957	0.338061	0.625253	-0.555077	0.659401	0.650248	0.697495	0.609109	0.518402	0.592062	0.650417	0.523761	0.679143	0.684912	0.291242			210-224 p1	0.313877	0.436142	0.726712	0.244993	0.822187	0.452493	0.646155	0.630977	0.526906	0.304835		0.317142	0.28919		0.698963	1	0.650657	0.559452	0.679989	0.672363	0.628253	0.684671	0.590684
	210-224 p2	-0.336295	-0.355579	-0.251209	-0.424405	-0.549698	-0.565976	0.189361	0.567597	0.461497	0.814572	-0.495436	0.946674	0.989506	0.923974	0.987509	0.962743	0.991949	0.98806	0.970204	0.982604	0.977398	0.801798			210-224 p2	0.530777	0.539198	0.949974	0.751627	0.873566	0.565493	0.923997	0.899046	0.862562	0.79737		0.549494	0.654442		0.994211	0.650657	1	0.915693	0.981068	0.966807	0.974664	0.992961	0.984604
	210-224 p3	-0.457369	-0.43867	-0.40757	-0.470513	-0.524126	-0.610058	-0.00253148	0.351927	0.19625	0.618383	-0.553195	0.786054	0.873023	0.742019	0.93358	0.943729	0.941725	0.955748	0.953305	0.931777	0.914719	0.588495			210-224 p3	0.434182	0.35053	0.862923	0.723357	0.749709	0.284447	0.753408	0.754778	0.645149	0.67		0.208693	0.441364		0.887596	0.559452	0.915693	1	0.845006	0.806793	0.818088	0.889297	0.911875
	212-224 p1	-0.390161	-0.405541	-0.284847	-0.492249	-0.62881	-0.607161	0.136483	0.525777	0.453495	0.807848	-0.557717	0.939642	0.980039	0.934366	0.948408	0.903971	0.960238	0.957618	0.924837	0.960197	0.962124	0.789097			212-224 p1	0.51264	0.580852	0.9433	0.693925	0.913321	0.624808	0.922736	0.888618	0.878331	0.761979		0.611345	0.649064		0.991919	0.679989	0.981068	0.845006	1	0.989784	0.981529	0.980624	0.974712
	225-240 p1	-0.32978	-0.347265	-0.213155	-0.44595	-0.589676	-0.549251	0.178069	0.542994	0.467699	0.785975	-0.532069	0.933099	0.984173	0.965822	0.920832	0.872695	0.943092	0.928976	0.9052	0.932894	0.94198	0.817758			225-240 p1	0.506348	0.542812	0.90289	0.630014	0.885962	0.640179	0.904532	0.854924	0.87682	0.733866		0.644506	0.646804		0.978373	0.672363	0.966807	0.806793	0.989784	1	0.991347	0.963922	0.964587
	225-240 p2	-0.252244	-0.272436	-0.147952	-0.368022	-0.505424	-0.488908	0.251906	0.621296	0.517096	0.808446	-0.447992	0.944567	0.993038	0.966349	0.939308	0.902413	0.953495	0.931382	0.924555	0.93162	0.935891	0.861784			225-240 p2	0.525825	0.512812	0.896755	0.669019	0.845883	0.650614	0.917696	0.867699	0.891942	0.774459		0.664744	0.688645		0.976237	0.628253	0.974664	0.818088	0.981529	0.991347	1	0.968669	0.963651
	225-240p3	-0.341315	-0.391923	-0.266211	-0.446982	-0.584154	-0.592261	0.207412	0.592971	0.520982	0.864412	-0.477364	0.970916	0.982408	0.93597	0.986143	0.953909	0.982688	0.980296	0.956686	0.988121	0.985689	0.80618			225-240p3	0.556128	0.617966	0.971459	0.777819	0.906847	0.602547	0.95276	0.936756	0.900982	0.829774		0.600473	0.709114		0.995057	0.684671	0.992961	0.889297	0.980624	0.963922	0.968669	1	0.975392
	386-406 p1	-0.420179	-0.438306	-0.337047	-0.512833	-0.617224	-0.633853	0.0851372	0.485447	0.36436	0.746908	-0.561564	0.914003	0.978383	0.914566	0.966736	0.942392	0.988225	0.975042	0.978754	0.977905	0.981171	0.778366			386-406 p1	0.47564	0.521033	0.920508	0.739833	0.85774	0.498197	0.881499	0.857692	0.851663	0.78221		0.519359	0.637446		0.979667	0.590684	0.984604	0.911875	0.974712	0.964587	0.963651	0.975392	1
	386-406 p2	-0.331914	-0.353403	-0.231138	-0.443441	-0.578491	-0.563743	0.18372	0.569303	0.475821	0.807503	-0.506317	0.945082	0.989329	0.949781	0.951481	0.912588	0.96589	0.951372	0.937132	0.954885	0.958796	0.831886			386-406 p2	0.508138	0.561589	0.924164	0.705146	0.877915	0.618849	0.922282	0.884321	0.895375	0.786883		0.636953	0.681156		0.987849	0.63159	0.983219	0.840352	0.994856	0.993132	0.992991	0.980004	0.980713
	386-406 p3	-0.33869	-0.301877	-0.326643	-0.317169	-0.32441	-0.461911	0.0284406	0.341642	0.114652	0.48574	-0.388322	0.641573	0.733776	0.554954	0.841199	0.892855	0.843329	0.845492	0.885149	0.804657	0.775742	0.531244			386-406 p3	0.392308	0.218959	0.71826	0.750034	0.536236	0.1441	0.6163	0.631983	0.515172	0.647855		0.0816675	0.386449		0.737234	0.286718	0.791444	0.946904	0.684545	0.633506	0.671354	0.750332	0.793626
	407-438 p1	-0.202127	-0.0904886	-0.0528588	-0.245791	-0.333229	-0.287778	0.104266	0.38528	0.181418	0.421201	-0.470296	0.65858	0.833783	0.778383	0.703253	0.681192	0.764483	0.729139	0.749348	0.684918	0.691152	0.696741			407-438 p1	0.323089	0.075346	0.591407	0.312163	0.568467	0.478247	0.604672	0.500932	0.576764	0.428766		0.42611	0.329306		0.774926	0.394224	0.78526	0.667384	0.808165	0.84831	0.85476	0.72893	0.80103
	407-438 p2	-0.198445	-0.124228	-0.0814991	-0.248369	-0.349019	-0.343654	0.193687	0.519222	0.297948	0.577471	-0.42415	0.783884	0.915127	0.821658	0.854066	0.851479	0.892479	0.86074	0.886957	0.817649	0.812303	0.80125			407-438 p2	0.439591	0.234745	0.735559	0.565185	0.647643	0.508283	0.74193	0.669881	0.699945	0.636855		0.472067	0.486984		0.873246	0.386185	0.896191	0.81248	0.884984	0.89773	0.920224	0.848055	0.902039
	407-438 p3	-0.279618	-0.236863	-0.271655	-0.247595	-0.25828	-0.398137	0.0782055	0.370005	0.139957	0.484971	-0.32799	0.619486	0.699825	0.508927	0.820853	0.879733	0.814047	0.819622	0.853773	0.7704	0.734862	0.524002			407-438 p3	0.413944	0.208568	0.697455	0.75547	0.500863	0.157352	0.602928	0.620688	0.487674	0.643499		0.0732808	0.376706		0.705644	0.251274	0.763282	0.923256	0.650234	0.592945	0.638054	0.720811	0.752894
	#2 AD	6-23	25-44	45-68 0N	68-97 1N	68-87 2N	212-221	243-254	275-286 3R	299-317 4R	354-369	407-438	6-23	25-44	45-68 0N	68-97 1N	68-87 2N	212-221	243-254	275-286 3R	299-317 4R	354-369	407-438			#2 AD	175-190 p1	210-224 p1	210-224 p2	210-224 p3	212-224 p1	225-240 p1	225-240 p2	225-240p3	386-406 p1	386-406 p2	386-406 p3	407-438 p1	407-438 p2	407-438 p3	175-190 p1	210-224 p1	210-224 p2	210-224 p3	212-224 p1	225-240 p1	225-240 p2	225-240p3	386-406 p1
		TBS											SI														TBS														SI
[truncated: 5 more columns]

## Sheet: c) CBD
c)		TBS											SI
	#1 CBD	6-23	25-44	45-68 0N	68-97 1N	68-87 2N	212-221	243-254	275-286 3R	299-317 4R	354-369	407-438	6-23	25-44	45-68 0N	68-97 1N	68-87 2N	212-221	243-254	275-286 3R	299-317 4R	354-369	407-438
TBS	6-23	1	0.985679	0.967988	0.964964	0.924428	0.960971	0.98869	0.934536	0.73583	0.929821	0.853489	0.728806	0.718318	0.606982	0.746853	0.523304	0.848381	0.299923	0.785741	-0.228351	-0.278556	0.515677
	25-44	0.985679	1	0.952766	0.924251	0.877059	0.911987	0.966841	0.934396	0.752347	0.944837	0.865846	0.699483	0.644051	0.592642	0.686706	0.479694	0.774332	0.293918	0.731679	-0.183141	-0.230549	0.469808
	45-68 0N	0.967988	0.952766	1	0.923545	0.864053	0.912628	0.968045	0.877691	0.827849	0.922376	0.846741	0.71207	0.701234	0.649895	0.736286	0.502456	0.809993	0.329334	0.721384	-0.159497	-0.217462	0.415038
	68-97 1N	0.964964	0.924251	0.923545	1	0.988277	0.98736	0.948897	0.888441	0.719977	0.848055	0.773989	0.748813	0.785734	0.618527	0.81823	0.582541	0.877802	0.345019	0.85096	-0.221411	-0.268961	0.578009
	68-87 2N	0.924428	0.877059	0.864053	0.988277	1	0.974584	0.90331	0.856258	0.68797	0.795862	0.716169	0.739381	0.795967	0.58993	0.82358	0.604325	0.868414	0.339705	0.873406	-0.232282	-0.276073	0.62137
	212-221	0.960971	0.911987	0.912628	0.98736	0.974584	1	0.951217	0.865168	0.688683	0.864111	0.740681	0.771603	0.804931	0.623113	0.821211	0.605712	0.922691	0.365936	0.840154	-0.222259	-0.270217	0.596201
	243-254	0.98869	0.966841	0.968045	0.948897	0.90331	0.951217	1	0.937547	0.751969	0.938546	0.868843	0.789558	0.756731	0.683544	0.800429	0.59745	0.891716	0.375341	0.822076	-0.146216	-0.198073	0.581708
	275-286 3R	0.934536	0.934396	0.877691	0.888441	0.856258	0.865168	0.937547	1	0.635101	0.865013	0.957602	0.657131	0.57672	0.55508	0.682595	0.459752	0.767516	0.204201	0.857513	-0.242135	-0.2761	0.65386
	299-317 4R	0.73583	0.752347	0.827849	0.719977	0.68797	0.688683	0.751969	0.635101	1	0.791804	0.620378	0.762534	0.666828	0.79971	0.7525	0.654172	0.644874	0.593484	0.607073	0.262722	0.203073	0.36273
	354-369	0.929821	0.944837	0.922376	0.848055	0.795862	0.864111	0.938546	0.865013	0.791804	1	0.805492	0.768473	0.699039	0.664047	0.699461	0.561695	0.808353	0.440004	0.700714	-0.0218133	-0.0714533	0.533964
	407-438	0.853489	0.865846	0.846741	0.773989	0.716169	0.740681	0.868843	0.957602	0.620378	0.805492	1	0.540457	0.406001	0.514282	0.565983	0.321332	0.6446	0.118708	0.767663	-0.225366	-0.255575	0.555494
SI	6-23	0.728806	0.699483	0.71207	0.748813	0.739381	0.771603	0.789558	0.657131	0.762534	0.768473	0.540457	1	0.87508	0.944972	0.959156	0.951365	0.893769	0.835118	0.793612	0.405586	0.357473	0.726126
	25-44	0.718318	0.644051	0.701234	0.785734	0.795967	0.804931	0.756731	0.57672	0.666828	0.699039	0.406001	0.87508	1	0.730391	0.901544	0.854735	0.888366	0.658345	0.726271	0.138228	0.0814548	0.608391
	45-68 0N	0.606982	0.592642	0.649895	0.618527	0.58993	0.623113	0.683544	0.55508	0.79971	0.664047	0.514282	0.944972	0.730391	1	0.905735	0.903345	0.762345	0.879275	0.69937	0.575279	0.529725	0.620887
	68-97 1N	0.746853	0.686706	0.736286	0.81823	0.82358	0.821211	0.800429	0.682595	0.7525	0.699461	0.565983	0.959156	0.901544	0.905735	1	0.924515	0.915452	0.741301	0.871737	0.269256	0.220187	0.737302
	68-87 2N	0.523304	0.479694	0.502456	0.582541	0.604325	0.605712	0.59745	0.459752	0.654172	0.561695	0.321332	0.951365	0.854735	0.903345	0.924515	1	0.793891	0.868353	0.713913	0.513126	0.469959	0.71196
	212-221	0.848381	0.774332	0.809993	0.877802	0.868414	0.922691	0.891716	0.767516	0.644874	0.808353	0.6446	0.893769	0.888366	0.762345	0.915452	0.793891	1	0.559845	0.868726	-0.00180489	-0.0500137	0.740182
	243-254	0.299923	0.293918	0.329334	0.345019	0.339705	0.365936	0.375341	0.204201	0.593484	0.440004	0.118708	0.835118	0.658345	0.879275	0.741301	0.868353	0.559845	1	0.436592	0.809935	0.778875	0.512187
	275-286 3R	0.785741	0.731679	0.721384	0.85096	0.873406	0.840154	0.822076	0.857513	0.607073	0.700714	0.767663	0.793612	0.726271	0.69937	0.871737	0.713913	0.868726	0.436592	1	-0.0377318	-0.0664162	0.88997
	299-317 4R	-0.228351	-0.183141	-0.159497	-0.221411	-0.232282	-0.222259	-0.146216	-0.242135	0.262722	-0.0218133	-0.225366	0.405586	0.138228	0.575279	0.269256	0.513126	-0.00180489	0.809935	-0.0377318	1	0.99711	0.161164
	354-369	-0.278556	-0.230549	-0.217462	-0.268961	-0.276073	-0.270217	-0.198073	-0.2761	0.203073	-0.0714533	-0.255575	0.357473	0.0814548	0.529725	0.220187	0.469959	-0.0500137	0.778875	-0.0664162	0.99711	1	0.154655
	407-438	0.515677	0.469808	0.415038	0.578009	0.62137	0.596201	0.581708	0.65386	0.36273	0.533964	0.555494	0.726126	0.608391	0.620887	0.737302	0.71196	0.740182	0.512187	0.88997	0.161164	0.154655	1
TBS	6-23	1	0.633661	0.751958	0.62497	0.634223	0.699581	0.926958	0.937458	0.803586	0.693095	0.753297	0.0720534	-0.0489871	-0.0344753	0.160636	0.00511754	0.30473	-0.178468	0.332598	-0.259977	-0.275459	0.497031
	25-44	0.633661	1	0.424918	0.78923	0.891525	0.875118	0.629226	0.644755	0.407729	0.168149	0.153526	-0.283211	-0.245154	-0.279464	-0.302414	-0.336181	0.0466136	-0.259205	-0.0649455	-0.226966	-0.25051	-0.0101644
	45-68 0N	0.751958	0.424918	1	0.431774	0.453321	0.576456	0.863644	0.648129	0.798009	0.567798	0.57439	0.314534	0.0444368	0.357231	0.203854	0.167954	0.17241	0.179303	-0.0538762	0.137301	0.0954635	0.398561
	68-97 1N	0.62497	0.78923	0.431774	1	0.895835	0.843516	0.619648	0.670785	0.263428	0.0922041	0.174193	-0.447899	-0.5915	-0.441696	-0.457162	-0.630752	-0.212357	-0.494018	-0.0486953	-0.435781	-0.475235	-0.161748
	68-87 2N	0.634223	0.891525	0.453321	0.895835	1	0.843597	0.623502	0.695559	0.281889	0.0764737	0.134177	-0.481902	-0.503669	-0.479924	-0.434113	-0.545831	0.0322021	-0.517451	-0.0141875	-0.48394	-0.511355	-0.0395623
	212-221	0.699581	0.875118	0.576456	0.843516	0.843597	1	0.7457	0.65264	0.349474	0.133196	0.188675	-0.342986	-0.461764	-0.308452	-0.313672	-0.442317	0.0331954	-0.398801	-0.0803541	-0.3771	-0.426661	0.0213716
	243-254	0.926958	0.629226	0.863644	0.619648	0.623502	0.7457	1	0.866322	0.798777	0.643452	0.68072	0.215243	0.02893	0.15735	0.280131	0.0828502	0.393525	-0.016744	0.255773	-0.127525	-0.140899	0.568038
	275-286 3R	0.937458	0.644755	0.648129	0.670785	0.695559	0.65264	0.866322	1	0.73834	0.730838	0.794513	-0.0262575	-0.0913635	-0.168505	0.085326	-0.134177	0.300808	-0.267643	0.506832	-0.385819	-0.364521	0.513088
	299-317 4R	0.803586	0.407729	0.798009	0.263428	0.281889	0.349474	0.798777	0.73834	1	0.873921	0.822427	0.558798	0.443047	0.480457	0.463121	0.450131	0.269023	0.398074	0.237661	0.301849	0.307332	0.580031
	354-369	0.693095	0.168149	0.567798	0.0922041	0.0764737	0.133196	0.643452	0.730838	0.873921	1	0.976585	0.54341	0.476667	0.372336	0.523412	0.394524	0.346579	0.311386	0.623671	0.129407	0.191882	0.727501
	407-438	0.753297	0.153526	0.57439	0.174193	0.134177	0.188675	0.68072	0.794513	0.822427	0.976585	1	0.416366	0.321101	0.231817	0.459342	0.27265	0.350303	0.134138	0.681776	-0.0512237	0.00524747	0.728474
SI	6-23	0.0720534	-0.283211	0.314534	-0.447899	-0.481902	-0.342986	0.215243	-0.0262575	0.558798	0.54341	0.416366	1	0.901217	0.960217	0.862283	0.888882	0.35931	0.917228	0.146184	0.785744	0.82431	0.573242
	25-44	-0.0489871	-0.245154	0.0444368	-0.5915	-0.503669	-0.461764	0.02893	-0.0913635	0.443047	0.476667	0.321101	0.901217	1	0.819028	0.848856	0.924069	0.477166	0.860257	0.249487	0.713543	0.778122	0.579574
	45-68 0N	-0.0344753	-0.279464	0.357231	-0.441696	-0.479924	-0.308452	0.15735	-0.168505	0.480457	0.372336	0.231817	0.960217	0.819028	1	0.747588	0.84842	0.215978	0.957757	-0.115545	0.885282	0.894926	0.393856
	68-97 1N	0.160636	-0.302414	0.203854	-0.457162	-0.434113	-0.313672	0.280131	0.085326	0.463121	0.523412	0.459342	0.862283	0.848856	0.747588	1	0.887928	0.707589	0.648883	0.424536	0.435213	0.488234	0.814375
	68-87 2N	0.00511754	-0.336181	0.167954	-0.630752	-0.545831	-0.442317	0.0828502	-0.134177	0.450131	0.394524	0.27265	0.888882	0.924069	0.84842	0.887928	1	0.499874	0.81236	0.092182	0.695732	0.717183	0.573036
	212-221	0.30473	0.0466136	0.17241	-0.212357	0.0322021	0.0331954	0.393525	0.300808	0.269023	0.346579	0.350303	0.35931	0.477166	0.215978	0.707589	0.499874	1	0.095509	0.597267	-0.150566	-0.0864265	0.874706
	243-254	-0.178468	-0.259205	0.179303	-0.494018	-0.517451	-0.398801	-0.016744	-0.267643	0.398074	0.311386	0.134138	0.917228	0.860257	0.957757	0.648883	0.81236	0.095509	1	-0.152921	0.954366	0.97707	0.256064
	275-286 3R	0.332598	-0.0649455	-0.0538762	-0.0486953	-0.0141875	-0.0803541	0.255773	0.506832	0.237661	0.623671	0.681776	0.146184	0.249487	-0.115545	0.424536	0.092182	0.597267	-0.152921	1	-0.413484	-0.294683	0.742058
	299-317 4R	-0.259977	-0.226966	0.137301	-0.435781	-0.48394	-0.3771	-0.127525	-0.385819	0.301849	0.129407	-0.0512237	0.785744	0.713543	0.885282	0.435213	0.695732	-0.150566	0.954366	-0.413484	1	0.989231	-0.0214487
	354-369	-0.275459	-0.25051	0.0954635	-0.475235	-0.511355	-0.426661	-0.140899	-0.364521	0.307332	0.191882	0.00524747	0.82431	0.778122	0.894926	0.488234	0.717183	-0.0864265	0.97707	-0.294683	0.989231	1	0.0563709
	407-438	0.497031	-0.0101644	0.398561	-0.161748	-0.0395623	0.0213716	0.568038	0.513088	0.580031	0.727501	0.728474	0.573242	0.579574	0.393856	0.814375	0.573036	0.874706	0.256064	0.742058	-0.0214487	0.0563709	1
	#2 CBD	6-23	25-44	45-68 0N	68-97 1N	68-87 2N	212-221	243-254	275-286 3R	299-317 4R	354-369	407-438	6-23	25-44	45-68 0N	68-97 1N	68-87 2N	212-221	243-254	275-286 3R	299-317 4R	354-369	407-438
		TBS											SI
		TBS											SI														TBS														SI
	#1 CBD	6-23	25-44	45-68 0N	68-97 1N	68-87 2N	212-221	243-254	275-286 3R	299-317 4R	354-369	407-438	6-23	25-44	45-68 0N	68-97 1N	68-87 2N	212-221	243-254	275-286 3R	299-317 4R	354-369	407-438			#1 CBD	175-190 p1	210-224 p1	210-224 p2	210-224 p3	212-224 p1	225-240 p1	225-240 p2	225-240p3	386-406 p1	386-406 p2	386-406 p3	407-438 p1	407-438 p2	407-438 p3	175-190 p1	210-224 p1	210-224 p2	210-224 p3	212-224 p1	225-240 p1	225-240 p2	225-240p3	386-406 p1
TBS	175-190 p1	0.795152	0.761805	0.756446	0.721401	0.662203	0.794487	0.822119	0.634998	0.515261	0.807269	0.519247	0.760108	0.745347	0.615966	0.680812	0.612983	0.844964	0.469317	0.530953	-0.00950453	-0.0611973	0.40185		TBS	175-190 p1	1	0.910947	0.745112		0.93252	0.866262	0.601383	0.764771	0.551962	0.206729					0.61028	-0.131582	0.184182	0.225738	0.373126	0.248301	-0.020538	-0.0272923	0.267545
	210-224 p1	0.881311	0.889966	0.895947	0.773958	0.695626	0.8056	0.90781	0.768118	0.762734	0.926236	0.723889	0.798593	0.683938	0.73957	0.714312	0.610408	0.801407	0.502688	0.591434	0.0834667	0.0260382	0.393489			210-224 p1	0.910947	1	0.650949		0.825752	0.775124	0.513576	0.665818	0.543835	0.381151					0.635963	-0.0470001	0.281695	0.23031	0.345921	0.258137	0.0540678	0.0389528	0.352232
	210-224 p2	0.576157	0.541065	0.561359	0.61593	0.619415	0.655186	0.57542	0.31598	0.603722	0.610569	0.114857	0.744323	0.866603	0.598284	0.6941	0.724321	0.686329	0.663129	0.382764	0.226872	0.170546	0.267948			210-224 p2	0.745112	0.650949	1		0.912781	0.684382	0.881554	0.838698	0.687418	0.329377					0.564254	-0.121762	0.534135	0.484942	0.626682	0.513318	0.322971	0.156353	0.67702
	210-224 p3																									210-224 p3
	212-224 p1	0.665183	0.642128	0.638185	0.617746	0.57931	0.68988	0.681938	0.435485	0.542357	0.729684	0.275219	0.755486	0.793098	0.604172	0.648278	0.66723	0.749422	0.594421	0.382555	0.156945	0.101704	0.289707			212-224 p1	0.93252	0.825752	0.912781		1	0.804148	0.805437	0.907488	0.641729	0.286054					0.673149	-0.0871095	0.376779	0.405366	0.586036	0.438458	0.198722	0.136349	0.507676
	225-240 p1	0.75868	0.721823	0.659996	0.725253	0.711526	0.767605	0.803608	0.720462	0.458419	0.761282	0.559323	0.823249	0.834886	0.63093	0.769364	0.751756	0.862562	0.504554	0.719832	0.0339047	-0.00768998	0.689069			225-240 p1	0.866262	0.775124	0.684382		0.804148	1	0.706525	0.705386	0.812177	0.484308					0.533296	-0.114078	0.26789	0.255543	0.338166	0.316685	0.0735475	-0.0149581	0.280061
	225-240 p2	0.358009	0.343103	0.333189	0.366525	0.382483	0.405153	0.397592	0.192967	0.481785	0.492504	0.00495084	0.709847	0.799105	0.570869	0.602477	0.770668	0.547377	0.720109	0.30519	0.43269	0.386675	0.359736			225-240 p2	0.601383	0.513576	0.881554		0.805437	0.706525	1	0.909373	0.82588	0.53087					0.646177	0.0708385	0.653004	0.650046	0.753018	0.711318	0.551047	0.380575	0.771714
	225-240p3	0.398168	0.389893	0.402622	0.331179	0.298151	0.410734	0.448141	0.200526	0.453558	0.584476	0.069092	0.675767	0.704693	0.558402	0.51239	0.659626	0.570454	0.673498	0.202024	0.392504	0.344197	0.256253			225-240p3	0.764771	0.665818	0.838698		0.907488	0.705386	0.909373	1	0.651784	0.370005					0.752397	0.114655	0.501441	0.612516	0.748789	0.657671	0.437366	0.382595	0.677583
	386-406 p1	0.554752	0.561556	0.4734	0.53786	0.556279	0.520706	0.571874	0.520597	0.484273	0.585472	0.33997	0.657695	0.754268	0.478987	0.604377	0.672599	0.551242	0.451612	0.50394	0.135421	0.0933891	0.471457			386-406 p1	0.551962	0.543835	0.687418		0.641729	0.812177	0.82588	0.651784	1	0.799367					0.388714	-0.161738	0.456094	0.290495	0.401947	0.402569	0.290987	0.0760845	0.456198
	386-406 p2	0.424616	0.509744	0.373914	0.352287	0.358146	0.291616	0.417538	0.502644	0.479886	0.554526	0.425499	0.391105	0.380375	0.290617	0.294096	0.34464	0.2177	0.265867	0.34773	0.151522	0.130627	0.357943			386-406 p2	0.206729	0.381151	0.329377		0.286054	0.484308	0.53087	0.370005	0.799367	1					0.183301	-0.0580907	0.305088	0.114022	0.185489	0.252028	0.247872	0.100113	0.338436
	386-406 p3																									386-406 p3
	407-438 p1																									407-438 p1
	407-438 p2																									407-438 p2
	407-438 p3																									407-438 p3
SI	175-190 p1	0.278021	0.299229	0.308351	0.209981	0.160147	0.266451	0.363544	0.181397	0.49211	0.448224	0.143074	0.751423	0.483754	0.811124	0.581879	0.749752	0.486229	0.866263	0.256197	0.75931	0.726089	0.332764		SI	175-190 p1	0.61028	0.635963	0.564254		0.673149	0.533296	0.646177	0.752397	0.388714	0.183301					1	0.622379	0.757979	0.83607	0.889173	0.831027	0.723959	0.759264	0.719768
	210-224 p1	-0.336931	-0.287229	-0.28451	-0.353642	-0.386889	-0.353368	-0.25038	-0.258662	0.00126119	-0.162747	-0.170651	0.200487	-0.147892	0.411854	0.0729341	0.261615	-0.141271	0.606519	-0.105843	0.894614	0.915272	0.136704			210-224 p1	-0.131582	-0.0470001	-0.121762		-0.0871095	-0.114078	0.0708385	0.114655	-0.161738	-0.0580907					0.622379	1	0.602385	0.744709	0.619655	0.726311	0.768084	0.905999	0.443974
	210-224 p2	0.0638299	0.0831253	0.120503	0.112911	0.121362	0.0878094	0.125622	-0.0194651	0.530688	0.162296	-0.0830246	0.630509	0.473376	0.737599	0.563675	0.749524	0.248819	0.869714	0.198583	0.864473	0.834115	0.228681			210-224 p2	0.184182	0.281695	0.534135		0.376779	0.26789	0.653004	0.501441	0.456094	0.305088					0.757979	0.602385	1	0.898696	0.876483	0.903017	0.928725	0.795182	0.899199
	210-224 p3	-0.0771467	-0.0803899	-0.00980718	-0.0433974	-0.0492013	-0.016952	0.0169803	-0.16752	0.350535	0.103768	-0.207789	0.583728	0.423388	0.686999	0.472085	0.702008	0.2494	0.910903	0.0985289	0.932536	0.911734	0.262303			210-224 p3	0.225738	0.23031	0.484942		0.405366	0.255543	0.650046	0.612516	0.290495	0.114022					0.83607	0.744709	0.898696	1	0.933576	0.984587	0.92139	0.884239	0.883401
	212-224 p1	-0.00274626	0.018274	0.0311917	-0.0109093	-0.0237915	0.0306713	0.0617133	-0.155959	0.351631	0.178013	-0.242327	0.579665	0.429521	0.629845	0.420104	0.673737	0.243377	0.863028	0.000355104	0.855753	0.828579	0.126116			212-224 p1	0.373126	0.345921	0.626682		0.586036	0.338166	0.753018	0.748789	0.401947	0.185489					0.889173	0.619655	0.876483	0.933576	1	0.940722	0.891664	0.854648	0.86059
	225-240 p1	-0.0438869	-0.0330753	0.00938805	-0.0270068	-0.0370553	-0.0105884	0.0453625	-0.124311	0.351279	0.148954	-0.177086	0.586987	0.445195	0.667564	0.458194	0.694904	0.236293	0.903977	0.0927402	0.925972	0.904593	0.263624			225-240 p1	0.248301	0.258137	0.513318		0.438458	0.316685	0.711318	0.657671	0.402569	0.252028					0.831027	0.726311	0.903017	0.984587	0.940722	1	0.930434	0.880712	0.882739
	225-240 p2	-0.238089	-0.193707	-0.186292	-0.217854	-0.207936	-0.227914	-0.168692	-0.275721	0.272901	-0.0583226	-0.30484	0.403741	0.202514	0.536314	0.279337	0.556558	-0.0225578	0.783394	-0.0623624	0.961845	0.952616	0.111194			225-240 p2	-0.020538	0.0540678	0.322971		0.198722	0.0735475	0.551047	0.437366	0.290987	0.247872					0.723959	0.768084	0.928725	0.92139	0.891664	0.930434	1	0.942126	0.831494
	225-240p3	-0.319933	-0.260134	-0.267518	-0.344794	-0.361308	-0.331137	-0.243367	-0.331201	0.132844	-0.100825	-0.30935	0.300181	0.00705686	0.465905	0.130802	0.410026	-0.108703	0.722218	-0.174393	0.977494	0.981288	0.0567724			225-240p3	-0.0272923	0.0389528	0.156353		0.136349	-0.0149581	0.380575	0.382595	0.0760845	0.100113					0.759264	0.905999	0.795182	0.884239	0.854648	0.880712	0.942126	1	0.69163
	386-406 p1	0.127392	0.1342	0.222147	0.167428	0.172836	0.170745	0.184361	-0.0267473	0.638255	0.308948	-0.0936419	0.639877	0.579123	0.70391	0.552794	0.726786	0.328248	0.872119	0.177225	0.782295	0.741226	0.211297			386-406 p1	0.267545	0.352232	0.67702		0.507676	0.280061	0.771714	0.677583	0.456198	0.338436					0.719768	0.443974	0.899199	0.883401	0.86059	0.882739	0.831494	0.69163	1
	386-406 p2	-0.0674476	-0.0622393	-0.00127235	0.0080952	0.0220564	0.00225673	-0.028214	-0.244962	0.395284	0.0576987	-0.34041	0.481228	0.454343	0.548355	0.407056	0.607719	0.143044	0.819647	-0.0204336	0.813229	0.785267	0.037651			386-406 p2	0.147037	0.152124	0.635036		0.426423	0.154404	0.71095	0.581016	0.371343	0.196291					0.6534	0.516078	0.912541	0.891716	0.896179	0.898721	0.881764	0.750492	0.924254
	386-406 p3	0.00861014	-0.0634357	0.11004	0.0682422	0.0209161	0.0363596	0.0678905	-0.119259	0.101826	-0.056669	-0.125462	0.218708	0.40838	0.277244	0.289162	0.278087	0.150953	0.354458	-0.0226539	0.295403	0.263346	-0.105655			386-406 p3	0.183592	0.105358	0.342195		0.252234	0.181967	0.34832	0.298589	0.229442	-0.0832703					0.250416	0.206884	0.426461	0.457296	0.36962	0.482265	0.32061	0.21441	0.382687
	407-438 p1	0.110122	0.127433	0.0508711	0.102779	0.117127	0.180258	0.171632	0.0341667	0.264679	0.290822	-0.0943335	0.662242	0.429789	0.633229	0.482703	0.727354	0.408041	0.827964	0.227723	0.725106	0.713809	0.439928			407-438 p1	0.470357	0.388159	0.561516		0.599858	0.496092	0.688942	0.708402	0.3949	0.186849					0.87187	0.569568	0.68762	0.796482	0.869427	0.790766	0.723263	0.745176	0.663833
	407-438 p2	-0.257212	-0.261021	-0.306391	-0.225277	-0.248576	-0.288663	-0.251685	-0.203371	-0.453802	-0.412883	-0.215235	-0.212921	-0.151709	-0.179212	-0.163904	-0.157006	-0.291207	-0.0785172	-0.235321	0.0962633	0.116294	-0.212976			407-438 p2	-0.164321	-0.271962	-0.173706		-0.185359	-0.0394578	-0.110268	-0.207606	0.0497856	-0.0788897					-0.0776837	0.251432	0.0924245	0.0407361	0.0325805	0.110983	0.125435	0.125624	-0.212209
	407-438 p3																									407-438 p3
TBS	175-190 p1	0.778596	0.788793	0.609831	0.457605	0.631796	0.780845	0.811204	0.716812	0.622357	0.452608	0.443803	0.0445446	0.0769202	-0.00429278	0.17724	0.090854	0.511291	-0.0879526	0.201881	-0.185034	-0.192434	0.494834		TBS	175-190 p1	1	0.747003	0.023797		0.817428	0.933473	-0.00246578	-0.0193411	0.0787969	0.170277		-0.146016			0.0645774	-0.252313	-0.14327	0.104498	-0.136942	-0.203796	-0.196463	-0.118035	-0.251733
	210-224 p1	0.632242	0.386188	0.518163	0.186374	0.379171	0.447228	0.707954	0.496922	0.466579	0.300775	0.330902	0.242375	0.22549	0.173161	0.517323	0.365482	0.815454	-0.0139038	0.255086	-0.155255	-0.165541	0.69017			210-224 p1	0.747003	1	0.132251		0.75187	0.605005	0.0356328	-0.0899304	0.0459926	0.0361702		-0.230944			0.137375	-0.253539	-0.0671518	0.065253	-0.171711	-0.15248	-0.134937	-0.0894954	-0.189503
	210-224 p2	-0.270339	-0.203841	0.0681128	-0.61028	-0.440916	-0.433128	-0.115538	-0.33029	0.268454	0.143303	-0.0416636	0.757799	0.862314	0.807035	0.623234	0.844166	0.309299	0.872527	-0.17174	0.817564	0.84207	0.289577			210-224 p2	0.023797	0.132251	1		0.48514	-0.00135606	0.951996	0.89076	0.316677	0.686508		0.334544			0.85979	0.786301	0.751189	0.787881	0.87824	0.846038	0.816215	0.841997	0.72815
	210-224 p3																									210-224 p3
	212-224 p1	0.424158	0.596492	0.372312	0.110093	0.400568	0.414134	0.522886	0.371976	0.47412	0.248503	0.162005	0.257837	0.419288	0.235904	0.400038	0.419709	0.662869	0.215626	0.0725513	0.115121	0.122166	0.499847			212-224 p1	0.817428	0.75187	0.48514		1	0.721389	0.387265	0.282351	-0.029139	0.385042		-0.191371			0.319974	0.0786988	0.0733452	0.309541	0.210335	0.126344	0.0797909	0.159045	-0.00308868
	225-240 p1	0.756503	0.89476	0.694355	0.621648	0.738317	0.872775	0.825095	0.691609	0.637923	0.391685	0.362033	0.0378532	-0.0110835	0.0446032	0.0114048	-0.0349381	0.268829	-0.0164292	-0.00128428	-0.0505718	-0.0733382	0.289555			225-240 p1	0.933473	0.605005	-0.00135606		0.721389	1	0.0565783	-0.0204844	0.16221	0.0691681		-0.0682479			0.0860966	-0.294388	-0.0312232	0.169085	-0.0792789	-0.078515	-0.0928423	-0.0358252	-0.0954412
	225-240 p2	-0.19871	-0.137902	0.15613	-0.48461	-0.380205	-0.380836	-0.0381187	-0.235733	0.379523	0.26973	0.0736362	0.828128	0.866301	0.869108	0.583188	0.781008	0.185839	0.947735	-0.143755	0.897286	0.932041	0.265244			225-240 p2	-0.00246578	0.0356328	0.951996		0.387265	0.0565783	1	0.930668	0.472247	0.71146		0.525331			0.908622	0.705387	0.850754	0.805245	0.943898	0.924545	0.903731	0.923316	0.817815
	225-240p3	-0.177995	-0.228128	0.0793911	-0.606366	-0.517675	-0.464141	-0.11024	-0.203363	0.412188	0.410042	0.221014	0.802016	0.886795	0.799584	0.567225	0.788869	0.135323	0.90377	-0.00332281	0.840149	0.887423	0.294284			225-240p3	-0.0193411	-0.0899304	0.89076		0.282351	-0.0204844	0.930668	1	0.552841	0.80982		0.665993			0.8893	0.80027	0.798665	0.785976	0.950347	0.844649	0.866339	0.900177	0.733837
	386-406 p1	0.427238	-0.0711544	0.548596	-0.0569837	-0.210543	-0.0760184	0.387395	0.288945	0.777196	0.698981	0.632235	0.709041	0.502157	0.677787	0.44374	0.544232	-0.114094	0.625824	0.00581562	0.6155	0.60189	0.277938			386-406 p1	0.0787969	0.0459926	0.316677		-0.029139	0.16221	0.472247	0.552841	1	0.269589		0.881534			0.690734	0.378715	0.711034	0.644596	0.495516	0.506936	0.657297	0.666311	0.589126
	386-406 p2	-0.038085	-0.114088	0.0515823	-0.465298	-0.325974	-0.32676	0.0496654	0.0941881	0.399974	0.583553	0.445369	0.640238	0.797417	0.536777	0.60552	0.603448	0.439172	0.624107	0.475802	0.42618	0.533207	0.600373			386-406 p2	0.170277	0.0361702	0.686508		0.385042	0.0691681	0.71146	0.80982	0.269589	1		0.487575			0.6425	0.445932	0.464439	0.405821	0.702811	0.514632	0.52646	0.595436	0.335212
	386-406 p3																									386-406 p3
	407-438 p1	0.193467	-0.218438	0.267303	-0.227137	-0.339381	-0.339505	0.110796	0.184298	0.61349	0.710706	0.622904	0.66359	0.564284	0.581178	0.367885	0.464548	-0.155716	0.621934	0.211515	0.581058	0.622495	0.250028			407-438 p1	-0.146016	-0.230944	0.334544		-0.191371	-0.0682479	0.525331	0.665993	0.881534	0.487575		1			0.62035	0.378367	0.63829	0.466855	0.599003	0.514324	0.643017	0.653969	0.516054
	407-438 p2																									407-438 p2
	407-438 p3																									407-438 p3
SI	175-190 p1	-0.0132419	-0.208039	0.297761	-0.461366	-0.478588	-0.310208	0.136229	-0.129315	0.532399	0.433868	0.271686	0.9517	0.88712	0.970817	0.747134	0.883914	0.208863	0.97399	-0.0787625	0.900627	0.917581	0.394597		SI	175-190 p1	0.0645774	0.137375	0.85979		0.319974	0.0860966	0.908622	0.8893	0.690734	0.6425		0.62035			1	0.726691	0.946549	0.914835	0.893535	0.901503	0.945646	0.968351	0.866414
	210-224 p1	-0.438063	-0.447373	-0.139875	-0.738085	-0.711499	-0.57382	-0.409934	-0.555731	0.0685638	-0.012859	-0.163816	0.550628	0.636874	0.638246	0.369182	0.703997	-0.116463	0.733152	-0.3725	0.782174	0.765219	-0.068967			210-224 p1	-0.252313	-0.253539	0.786301		0.0786988	-0.294388	0.705387	0.80027	0.378715	0.445932		0.378367			0.726691	1	0.693544	0.806941	0.78039	0.73998	0.761304	0.767389	0.717822
	210-224 p2	-0.133411	-0.283169	0.267266	-0.390819	-0.508314	-0.332468	0.0365053	-0.255467	0.409866	0.29233	0.140595	0.890585	0.735895	0.959195	0.585988	0.735573	-0.0513181	0.966215	-0.252086	0.953006	0.95198	0.164845			210-224 p2	-0.14327	-0.0671518	0.751189		0.0733452	-0.0312232	0.850754	0.798665	0.711034	0.464439		0.63829			0.946549	0.693544	1	0.903564	0.864196	0.950188	0.986126	0.977385	0.969702
	210-224 p3	-0.0369058	-0.0922954	0.329007	-0.363326	-0.40224	-0.148952	0.100465	-0.225074	0.453853	0.224368	0.0640777	0.768416	0.681023	0.873845	0.507638	0.752901	-0.0270134	0.884413	-0.414536	0.910965	0.875709	0.10829			210-224 p3	0.104498	0.065253	0.787881		0.309541	0.169085	0.805245	0.785976	0.644596	0.405821		0.466855			0.914835	0.806941	0.903564	1	0.806781	0.866447	0.895976	0.907014	0.889822
	212-224 p1	-0.309447	-0.229436	-0.0501121	-0.555184	-0.540117	-0.474968	-0.203548	-0.34441	0.274181	0.242036	0.0423907	0.800174	0.862713	0.821896	0.529188	0.736881	0.0290411	0.948428	-0.119222	0.917068	0.958047	0.1456			212-224 p1	-0.136942	-0.171711	0.87824		0.210335	-0.0792789	0.943898	0.950347	0.495516	0.702811		0.599003			0.893535	0.78039	0.864196	0.806781	1	0.934194	0.926043	0.945879	0.836749
	225-240 p1	-0.342559	-0.269182	0.0916976	-0.476338	-0.514503	-0.403629	-0.152655	-0.42703	0.22532	0.104501	-0.0783183	0.807038	0.740346	0.901671	0.483997	0.686706	-0.0618628	0.969653	-0.332029	0.975537	0.984937	0.0467634			225-240 p1	-0.203796	-0.15248	0.846038		0.126344	-0.078515	0.924545	0.844649	0.506936	0.514632		0.514324			0.901503	0.73998	0.950188	0.866447	0.934194	1	0.978241	0.966807	0.965513
	225-240 p2	-0.2333	-0.316096	0.164291	-0.481611	-0.555785	-0.425285	-0.0814207	-0.334389	0.346261	0.246424	0.0767398	0.871848	0.776467	0.939615	0.556598	0.749191	-0.0611817	0.984761	-0.258898	0.978425	0.986234	0.123724			225-240 p2	-0.196463	-0.134937	0.816215		0.0797909	-0.0928423	0.903731	0.866339	0.657297	0.52646		0.643017			0.945646	0.761304	0.986126	0.895976	0.926043	0.978241	1	0.993238	0.967066
	225-240p3	-0.177776	-0.2627	0.177353	-0.471205	-0.528953	-0.396344	-0.0333855	-0.268822	0.406269	0.313617	0.137741	0.891726	0.824753	0.940557	0.600438	0.78331	-0.00195978	0.992128	-0.196883	0.966994	0.981931	0.189203			225-240p3	-0.118035	-0.0894954	0.841997		0.159045	-0.0358252	0.923316	0.900177	0.666311	0.595436		0.653969			0.968351	0.767389	0.977385	0.907014	0.945879	0.966807	0.993238	1	0.939748
	386-406 p1	-0.293005	-0.29571	0.179467	-0.385943	-0.506938	-0.340569	-0.105503	-0.421613	0.235266	0.0713024	-0.0840722	0.766911	0.610136	0.892517	0.41676	0.620731	-0.20437	0.922644	-0.451165	0.967533	0.948112	-0.0519027			386-406 p1	-0.251733	-0.189503	0.72815		-0.00308868	-0.0954412	0.817815	0.733837	0.589126	0.335212		0.516054			0.866414	0.717822	0.969702	0.889822	0.836749	0.965513	0.967066	0.939748	1
	386-406 p2	-0.272426	-0.224603	0.167722	-0.410804	-0.474345	-0.3402	-0.10886	-0.394448	0.283521	0.107955	-0.0690222	0.77634	0.677749	0.891541	0.419869	0.663787	-0.164979	0.950324	-0.437029	0.99432	0.98121	-0.0314716			386-406 p2	-0.181591	-0.164315	0.802509		0.101842	-0.0357475	0.885286	0.815636	0.591496	0.415888		0.544012			0.895107	0.764208	0.961685	0.9156	0.898953	0.983023	0.978737	0.963577	0.984885
	386-406 p3	0.479009	0.153386	0.634457	-0.0860206	-0.046727	0.148785	0.560408	0.28656	0.757985	0.500042	0.419551	0.670224	0.588464	0.687308	0.653247	0.755977	0.350533	0.58274	-0.114566	0.527395	0.487053	0.486608			386-406 p3	0.51459	0.55596	0.586281		0.602505	0.452746	0.539532	0.517786	0.642282	0.329547		0.330067			0.734879	0.486204	0.598123	0.773005	0.42901	0.453339	0.542362	0.590621	0.487158
	407-438 p1	-0.168542	-0.066638	0.157013	-0.464242	-0.395933	-0.258025	-0.0194361	-0.253743	0.369675	0.265779	0.0661881	0.805102	0.82154	0.856676	0.516672	0.726094	0.121649	0.939221	-0.180489	0.905144	0.931795	0.210729			407-438 p1	0.0804796	0.016502	0.879285		0.366172	0.158454	0.946824	0.920683	0.499576	0.665145		0.527292			0.903366	0.707101	0.857267	0.85407	0.947871	0.92544	0.901165	0.919855	0.831909
	407-438 p2	0.222466	0.0318942	0.442885	-0.316439	-0.292385	-0.0193036	0.364569	0.0858185	0.64895	0.561644	0.415118	0.886451	0.819839	0.879357	0.720574	0.799141	0.352569	0.852376	0.0507697	0.742665	0.764323	0.533511			407-438 p2	0.378163	0.335429	0.734029		0.484153	0.380139	0.791584	0.803861	0.659704	0.650137		0.551117			0.917138	0.550878	0.810617	0.844295	0.769569	0.750159	0.79113	0.831806	0.699257
	407-438 p3																									407-438 p3
	#2 CBD	6-23	25-44	45-68 0N	68-97 1N	68-87 2N	212-221	243-254	275-286 3R	299-317 4R	354-369	407-438	6-23	25-44	45-68 0N	68-97 1N	68-87 2N	212-221	243-254	275-286 3R	299-317 4R	354-369	407-438			#2 CBD	175-190 p1	210-224 p1	210-224 p2	210-224 p3	212-224 p1	225-240 p1	225-240 p2	225-240p3	386-406 p1	386-406 p2	386-406 p3	407-438 p1	407-438 p2	407-438 p3	175-190 p1	210-224 p1	210-224 p2	210-224 p3	212-224 p1	225-240 p1	225-240 p2	225-240p3	386-406 p1
		TBS											SI														TBS														SI
[truncated: 5 more columns]
