# Supplementary material for: Tau protein profiling in tauopathies: a human brain study
Source: Mol Neurodegener. 2024 Jul 19;19:54. doi: 10.1186/s13024-024-00741-9 (PMC11264707; doi:10.1186/s13024-024-00741-9)
Supplement: Supplementary file 7 — Supplementary Material 7: Table 3 [file 13024_2024_741_MOESM7_ESM.xlsx]

## Sheet: Linearity
			Ratios of measured peak areas				Fitting performed using the Weighted Linear Regression Excel add-in tool by Real Statistics (www.real-statistics.com)
TBS fraction
			Non-phospho peptides													Phospho peptides
Fit weight (1/x)	Relative sample amount		6-23	25-44	45-68 0N	68-97 1N	68-87 2N	195-209	212-221	243-254	275-286 3R	299-317 4R	354-369	407-438		175-190-p1	195-209-p1	210-224-p1	210-224-p2	212-224-p1	225-240-p1	225-240-p2	225-240-p3	386-406-p1	386-406-p2
8	0.125		1.0622	0.7464	0.647133	0.525833	0.0422	0.9925	1.3786	1.4876	0.8559	0.793	1.1011	1.0301		0.0944	0.0313	0.0006	0.0067	0.0258	0.0499	0.0478	0.0147	0.0001	0.0005
8	0.125		1.6942	1.1826	0.997667	0.9414	0.0606667	1.6636	2.2719	2.5539	1.57213	1.058	2.0852	0.5845		0.2098	0.0716	0.0371	0.0195	0.0671	0.1061	0.1022	0.0217	0.0001	0.0083
8	0.125		1.842	1.2368	1.08593	0.9355	0.0622667	1.6834	2.3752	2.7685	1.69317	1.06	2.2067	0.6743		0.2286	0.0729	0.022	0.0226	0.0684	0.1119	0.1032	0.0239	0	0.0067
4	0.25		2.7647	2.0383	1.71117	1.5072	0.1066	2.7167	3.9115	4.1247	2.73997	1.73607	3.5055	1.1386		0.344	0.1052	0.0698	0.0356	0.1083	0.1599	0.1557	0.0352	0	0.018
4	0.25		2.9678	2.0887	1.7312	1.57157	0.113633	2.8796	3.8974	4.5187	2.88367	1.90047	3.7636	0.9595		0.3535	0.1126	0.0675	0.0353	0.0999	0.1628	0.1501	0.0317	0.0001	0.0195
4	0.25		3.378	2.3205	1.95883	1.72607	0.125533	3.0584	4.3163	4.9136	3.1927	2.0008	4.0432	1.2163		0.333	0.1071	0.0593	0.0235	0.0951	0.1565	0.1559	0.0296	0.0001	0.0154
2	0.5		5.4667	4.4752	3.55223	3.03547	0.2164	5.3864	7.6128	8.4175	5.2498	3.5354	7.4498	1.9378		0.6647	0.1987	0.1639	0.0705	0.1996	0.3175	0.3196	0.068	0.0002	0.0275
2	0.5		6.6711	4.7179	3.91797	3.55027	0.2557	6.2776	8.5601	10.1565	6.54927	4.10247	8.9455	2.3296		0.7724	0.2321	0.2377	0.094	0.2451	0.3707	0.3833	0.0749	0.0006	0.0495
2	0.5		6.6826	4.3169	4.02493	3.72187	0.229233	6.2525	8.8608	9.868	6.13913	4.04407	8.1488	2.292		0.7998	0.2384	0.2049	0.0761	0.2332	0.3673	0.3516	0.0776	0.0006	0.0438
1	1		11.576	10.8475	6.6533	6.62397	0.430933	11.0802	15.2746	18.4588	12.2501	7.8712	16.1989	3.9794		1.2987	0.3554	0.4328	0.1559	0.3909	0.6482	0.6921	0.1403	0.0007	0.0711
1	1		12.667	9.0549	7.25923	6.78587	0.481467	11.9561	16.2124	19.5086	12.3637	7.94773	16.4123	4.3371		1.4323	0.4273	0.4357	0.1583	0.4473	0.6721	0.7197	0.1558	0.0008	0.0843
1	1		13.0944	9.3542	7.8481	6.87703	0.456467	12.5109	16.8363	19.4573	12.9297	8.6976	17.1777	4.1883		1.2434	0.4249	0.3285	0.101	0.3659	0.6183	0.6247	0.115	0.0008	0.0765
0.5	2		23.6513	17.3556	14.6903	11.6552	0.864	21.9358	30.1634	36.441	22.7739	16.2619	32.4322	8.7309		2.5512	0.7363	0.6367	0.2892	0.8294	1.1971	1.3446	0.2745	0.0014	0.1649
0.5	2		24.9552	17.6125	13.5862	13.7266	0.9616	22.4903	31.2705	38.7004	24.1132	16.9598	35.0296	8.3932		2.5196	0.7516	0.7361	0.326	0.8095	1.2209	1.5089	0.3083	0.0023	0.1613
0.5	2		23.2657	16.861	14.5381	13.8671	0.8541	21.4361	30.0624	36.8119	23.1749	16.8441	34.3013	7.5184		2.4112	0.7352	0.7788	0.3167	0.7938	1.206	1.3916	0.2937	0.0023	0.174
0.25	4		44.6657	36.9085	28.1709	24.7892	1.72983	42.4915	56.3906	77.8999	45.8671	38.0669	77.4171	13.0762		4.4015	1.1931	1.0449	0.6416	1.4675	2.0974	2.8195	0.5825	0.0044	0.3195
0.25	4		41.6706	31.0761	25.2277	23.7069	1.59733	39.4445	53.118	71.2276	42.5366	35.6816	69.6859	13.0761		4.1233	1.1193	1.1208	0.5726	1.4336	2.0975	2.75	0.5711	0.0051	0.3159
0.25	4		47.4406	33.2892	26.5667	26.1436	1.6315	41.4567	59.0425	76.6274	47.4104	39.6164	80.1727	16.2919		4.3239	1.2107	1.1782	0.5886	1.5134	2.1289	2.9299	0.6056	0.0048	0.3221
		Adjusted r2:	0.991928	0.989945	0.993138	0.992389	0.993384	0.992884	0.992115	0.996193	0.99387	0.99231	0.991776	0.978255		0.980835	0.967261	0.944982	0.983378	0.988575	0.985351	0.994888	0.993016	0.948989	0.989448
SI fraction
			Non-phospho peptides													Phospho peptides
Fit weight (1/x)	Relative sample amount		6-23	25-44	45-68 0N	68-97 1N	68-87 2N	195-209	212-221	243-254	275-286 3R	299-317 4R	354-369	407-438		175-190-p1	195-209-p1	210-224-p1	210-224-p2	212-224-p1	225-240-p1	225-240-p2	225-240-p3	386-406-p1	386-406-p2
16	0.0625		0.8087	0.3884	0.535167	0.2337	0.0191	0.0739	0.334	3.9426	2.73263	1.67873	6.8842	0.0517		0.186	0.0071	0.043	0.0629	0.1713	0.1702	0.492	0.1021	0.0005	0.0417
16	0.0625		0.8399	0.395	0.497267	0.2563	0.0189	0.0737	0.3564	4.1536	2.64253	1.7666	7.0522	0.0547		0.1688	0.0058	0.093	0.0553	0.1589	0.1544	0.4183	0.0875	0.0005	0.0321
8	0.125		1.8758	1.0739	1.27737	0.5258	0.0483667	0.1714	0.8237	10.3349	6.8604	4.18747	17.264	0.1219		0.3938	0.0162	0.2374	0.1223	0.388	0.3797	1.0045	0.1905	0.0024	0.0902
8	0.125		1.6706	0.7487	0.8919	0.468933	0.0396667	0.1466	0.6351	8.5339	5.61153	3.4944	14.2523	0.1044		0.3523	0.0128	0.1496	0.1162	0.3288	0.3357	0.9144	0.185	0.0014	0.0854
4	0.25		3.4997	1.9656	2.16793	0.9958	0.0877	0.2908	1.2639	17.718	11.5657	7.60333	28.1662	0.3351		0.7556	0.0268	0.2964	0.2482	0.6864	0.7028	1.9859	0.3975	0.004	0.1738
4	0.25		3.6943	1.896	2.259	1.03793	0.107933	0.3106	1.4399	19.2442	15.4193	8.86713	35.9142	0.2641		0.7647	0.0296	0.3466	0.2633	0.7237	0.7229	2.043	0.4004	0.0041	0.1991
2	0.5		6.6281	3.4274	4.24127	1.85883	0.172933	0.5117	2.3292	34.8095	23.2012	15.5069	58.2769	0.3889		1.4518	0.0453	0.4984	0.4997	1.2594	1.2772	3.7455	0.787	0.0065	0.2959
2	0.5		6.5051	3.4488	3.98357	1.8426	0.1765	0.5268	2.3004	33.4047	23.1684	15.2592	55.2554	0.4148		1.4619	0.0541	0.7053	0.4966	1.3605	1.3167	3.9348	0.7555	0.0057	0.2809
1	1		12.2837	6.3666	7.87293	3.38197	0.3748	1.0685	4.5372	65.0839	46.9214	30.7313	110.262	0.6894		3.4456	0.0989	1.4258	1.1774	3.3495	3.2271	8.9929	1.78	0.0196	0.8124
1	1		13.0512	6.8406	8.58263	3.6853	0.350167	0.996	4.3135	64.4368	37.2313	26.9143	97.0597	0.7566		2.7535	0.0933	0.9014	0.9428	2.3638	2.3352	6.7947	1.4256	0.0108	0.4551
0.5	2		30.333	14.8525	24.9848	7.79883	0.697733	1.9597	8.8849	135.556	110.457	66.1895	227.016	1.6231		6.6931	0.2012	3.5711	2.2892	5.3178	5.6908	15.5893	3.4826	0.0301	1.534
0.5	2		26.2876	13.7543	19.255	7.09177	0.657967	1.9469	8.3456	133.495	90.1326	63.0065	227.751	1.5594		5.8447	0.1957	2.121	2.0899	5.0098	5.1611	15.0739	2.9782	0.0221	1.1551
		Adjusted r2:	0.991448	0.993617	0.959755	0.995655	0.994034	0.995448	0.993246	0.997143	0.975072	0.993435	0.991486	0.970945		0.990848	0.994145	0.910902	0.992631	0.982294	0.98653	0.991166	0.990083	0.928337	0.949904
